# Supplementary material
Source: publisher figshare collection journal article supplement (https://acs.figshare.com/ndownloader/files/22762487)
Supplement: Supplementary file 1 [file 22762487]

## Sheet: Cover Page
S1
Supporting information
Pulsed SILAM reveals in vivo dynamics of murine brain protein translation
Ser Sue Ng 1, Jung Eun Park 1, Wei Meng 1, Christopher P. Chen 2,3, Raj N. Kalaria 4, Neil E McCarthy 5, Siu Kwan Sze 1,*
1School of Biological Sciences, Nanyang Technological University, 60 Nanyang Drive, Singapore, 637551 Singapore.
2Memory, Aging and Cognition Centre, National University Health System, 1E Kent Ridge Road, 119228 Singapore.
3Department of Pharmacology, Yong Loo Lin School of Medicine, National University of Singapore, Blk MD3, 16 Medical Drive, 117600 Singapore.
4Institute of Neuroscience, Campus for Ageing and Vitality, Newcastle University, Newcastle upon Tyne, NE4 5PL, United Kingdom.
5Centre for Immunobiology, The Blizard Institute, Bart's and The London School of Medicine and Dentistry, Queen Mary University of London, 4 Newark St, London, E1 2AT, United Kingdom.

## Sheet: Table S5A_Structure_Enrichment
	Table S5A_Structure_Enrichment of actively translating proteins in murine brain tissue by Metscape
GroupID	Category	Term	Description	LogP	Log(q-value)	InTerm_InList	Genes	Symbols
1_Summary	GO Cellular Components	GO:0098794	postsynapse	-54.7487	-51.3563	167/728	11308,11676,11735,11776,11784,11785,11840,11843,11848,12262,12293,12322,12323,12325,12326,12330,12386,12387,12540,12568,12846,12889,12890,12955,13116,13169,13175,13196,13429,13518,13669,13684,13690,13823,13829,13838,13854,14265,14360,14394,14395,14396,14704,14810,14811,14812,14815,15387,15444,15481,15507,16438,16498,16560,16646,17755,17756,17758,17762,17918,17920,17957,17999,18125,18195,18212,182…	Abi1,Aldoc,Ank3,Ap3d1,Apba2,Apbb1,Arf1,Arf4,Rhoa,C1qc,Cacna2d1,Camk2a,Camk2b,Camk2g,Camk4,Canx,Ctnna2,Ctnnb1,Cdc42,Cdk5,Comt,Cplx1,Cplx2,Cryab,Cyp46a1,Dbnl,Dclk1,Asap1,Dnm1,Dst,Eif3a,Eif4e,Eif4g2,Epb41l3,Dmtn,Epha4,Epn1,Fmr1,Fyn,Gabra1,Gabra2,Gabra3,Gng3,Grin1,Grin2a,Grin2b,Nr3c1,Hnrnpk,Hpca,Hspa8,Hspb1,Itpr1,Kcnab2,Kif1a,Kpna1,Map1b,Map2,Map4,Mapt,Myo5a,Myo6,Napb,Nedd4,Nos1,Nsf,Ntrk2,Numb,Pak1,P…
1_Member	GO Cellular Components	GO:0098794	postsynapse	-54.7487	-51.3563	167/728	11308,11676,11735,11776,11784,11785,11840,11843,11848,12262,12293,12322,12323,12325,12326,12330,12386,12387,12540,12568,12846,12889,12890,12955,13116,13169,13175,13196,13429,13518,13669,13684,13690,13823,13829,13838,13854,14265,14360,14394,14395,14396,14704,14810,14811,14812,14815,15387,15444,15481,15507,16438,16498,16560,16646,17755,17756,17758,17762,17918,17920,17957,17999,18125,18195,18212,182…	Abi1,Aldoc,Ank3,Ap3d1,Apba2,Apbb1,Arf1,Arf4,Rhoa,C1qc,Cacna2d1,Camk2a,Camk2b,Camk2g,Camk4,Canx,Ctnna2,Ctnnb1,Cdc42,Cdk5,Comt,Cplx1,Cplx2,Cryab,Cyp46a1,Dbnl,Dclk1,Asap1,Dnm1,Dst,Eif3a,Eif4e,Eif4g2,Epb41l3,Dmtn,Epha4,Epn1,Fmr1,Fyn,Gabra1,Gabra2,Gabra3,Gng3,Grin1,Grin2a,Grin2b,Nr3c1,Hnrnpk,Hpca,Hspa8,Hspb1,Itpr1,Kcnab2,Kif1a,Kpna1,Map1b,Map2,Map4,Mapt,Myo5a,Myo6,Napb,Nedd4,Nos1,Nsf,Ntrk2,Numb,Pak1,P…
1_Member	GO Cellular Components	GO:0098978	glutamatergic synapse	-44.9469	-42.1566	126/507	11308,11773,11776,11785,11816,11840,11843,11848,12293,12298,12322,12323,12326,12330,12552,12568,12889,12890,13001,13429,13684,13838,14265,14360,14810,14811,14812,14815,15387,15444,15481,15572,16646,16785,17918,17920,17957,17988,17999,18125,18164,18189,18212,18222,18479,18643,18754,18798,19045,19047,19055,19058,19084,19085,19229,19744,19878,20614,22317,22629,22631,23879,23969,24012,26395,26414,268…	Abi1,Ap2m1,Ap3d1,Apbb1,Apoe,Arf1,Arf4,Rhoa,Cacna2d1,Cacnb4,Camk2a,Camk2b,Camk4,Canx,Cdh11,Cdk5,Cplx1,Cplx2,Csnk2b,Dnm1,Eif4e,Epha4,Fmr1,Fyn,Grin1,Grin2a,Grin2b,Nr3c1,Hnrnpk,Hpca,Hspa8,Elavl4,Kpna1,Rpsa,Myo5a,Myo6,Napb,Ndrg1,Nedd4,Nos1,Nptx1,Nrxn1,Ntrk2,Numb,Pak1,Pfn1,Prkce,Plcb4,Ppp1ca,Ppp1cc,Ppp3ca,Ppp3r1,Prkar1a,Prkar1b,Ptk2b,Rheb,Rock2,Snap25,Vamp1,Ywhah,Ywhaz,Fxr2,Pacsin1,Rgs7,Map2k1,Mapk10,P…
1_Member	GO Cellular Components	GO:0032279	asymmetric synapse	-33.4779	-30.9307	96/393	11308,11840,12322,12323,12325,12386,12387,12568,12955,13169,13175,13429,13518,13669,13690,13823,13829,13838,14265,14360,14704,14810,14811,14812,14815,15387,15481,15507,16438,16498,16646,17755,17756,17758,17762,17920,18125,18195,18212,18222,18479,18483,18521,18607,18752,18798,19052,19122,19229,19744,22631,23879,23969,26395,26413,26414,26875,50997,52163,53310,54725,56013,56440,56637,65019,65114,662…	Abi1,Arf1,Camk2a,Camk2b,Camk2g,Ctnna2,Ctnnb1,Cdk5,Cryab,Dbnl,Dclk1,Dnm1,Dst,Eif3a,Eif4g2,Epb41l3,Dmtn,Epha4,Fmr1,Fyn,Gng3,Grin1,Grin2a,Grin2b,Nr3c1,Hnrnpk,Hspa8,Hspb1,Itpr1,Kcnab2,Kpna1,Map1b,Map2,Map4,Mapt,Myo6,Nos1,Nsf,Ntrk2,Numb,Pak1,Palm,Pcbp2,Pdpk1,Prkcg,Plcb4,Ppp2ca,Prnp,Ptk2b,Rheb,Ywhaz,Fxr2,Pacsin1,Map2k1,Mapk1,Mapk10,Pclo,Mpp2,Camk1,Dlg3,Cadm1,Srcin1,Snx1,Gsk3b,Rpl23,Vps35,Camk2n1,Cap2,S…
1_Member	GO Cellular Components	GO:0099572	postsynaptic specialization	-33.0327	-30.6299	100/429	11308,11840,12322,12323,12325,12386,12387,12568,12955,13169,13175,13429,13518,13669,13690,13823,13829,13838,14265,14360,14394,14395,14396,14704,14810,14811,14812,14815,15387,15481,15507,16438,16498,16646,17755,17756,17758,17762,17920,18125,18195,18212,18222,18479,18483,18521,18607,18752,18798,19052,19122,19229,19744,22631,23879,23969,26395,26413,26414,26875,50997,52163,53310,54725,56013,56440,566…	Abi1,Arf1,Camk2a,Camk2b,Camk2g,Ctnna2,Ctnnb1,Cdk5,Cryab,Dbnl,Dclk1,Dnm1,Dst,Eif3a,Eif4g2,Epb41l3,Dmtn,Epha4,Fmr1,Fyn,Gabra1,Gabra2,Gabra3,Gng3,Grin1,Grin2a,Grin2b,Nr3c1,Hnrnpk,Hspa8,Hspb1,Itpr1,Kcnab2,Kpna1,Map1b,Map2,Map4,Mapt,Myo6,Nos1,Nsf,Ntrk2,Numb,Pak1,Palm,Pcbp2,Pdpk1,Prkcg,Plcb4,Ppp2ca,Prnp,Ptk2b,Rheb,Ywhaz,Fxr2,Pacsin1,Map2k1,Mapk1,Mapk10,Pclo,Mpp2,Camk1,Dlg3,Cadm1,Srcin1,Snx1,Gsk3b,Erbin…
1_Member	GO Cellular Components	GO:0014069	postsynaptic density	-33.0222	-30.6299	95/390	11308,11840,12322,12323,12325,12386,12387,12568,12955,13169,13175,13429,13518,13669,13690,13823,13829,13838,14265,14360,14704,14810,14811,14812,14815,15387,15481,15507,16438,16498,16646,17755,17756,17758,17762,17920,18125,18195,18212,18222,18479,18483,18521,18607,18752,18798,19052,19122,19229,19744,22631,23879,23969,26395,26413,26414,26875,50997,52163,53310,54725,56013,56440,56637,65019,65114,662…	Abi1,Arf1,Camk2a,Camk2b,Camk2g,Ctnna2,Ctnnb1,Cdk5,Cryab,Dbnl,Dclk1,Dnm1,Dst,Eif3a,Eif4g2,Epb41l3,Dmtn,Epha4,Fmr1,Fyn,Gng3,Grin1,Grin2a,Grin2b,Nr3c1,Hnrnpk,Hspa8,Hspb1,Itpr1,Kcnab2,Kpna1,Map1b,Map2,Map4,Mapt,Myo6,Nos1,Nsf,Ntrk2,Numb,Pak1,Palm,Pcbp2,Pdpk1,Prkcg,Plcb4,Ppp2ca,Prnp,Ptk2b,Rheb,Ywhaz,Fxr2,Pacsin1,Map2k1,Mapk1,Mapk10,Pclo,Mpp2,Camk1,Dlg3,Cadm1,Srcin1,Snx1,Gsk3b,Rpl23,Vps35,Camk2n1,Cap2,S…
1_Member	GO Cellular Components	GO:0098984	neuron to neuron synapse	-32.5904	-30.2394	98/418	11308,11840,12322,12323,12325,12386,12387,12568,12955,13169,13175,13429,13518,13669,13690,13823,13829,13838,14265,14360,14704,14810,14811,14812,14815,15387,15481,15507,16438,16498,16646,17755,17756,17758,17762,17920,18125,18195,18212,18222,18479,18483,18521,18607,18619,18752,18798,19052,19085,19122,19229,19744,22631,23879,23969,26395,26413,26414,26875,50997,52163,53310,54725,56013,56440,56637,650…	Abi1,Arf1,Camk2a,Camk2b,Camk2g,Ctnna2,Ctnnb1,Cdk5,Cryab,Dbnl,Dclk1,Dnm1,Dst,Eif3a,Eif4g2,Epb41l3,Dmtn,Epha4,Fmr1,Fyn,Gng3,Grin1,Grin2a,Grin2b,Nr3c1,Hnrnpk,Hspa8,Hspb1,Itpr1,Kcnab2,Kpna1,Map1b,Map2,Map4,Mapt,Myo6,Nos1,Nsf,Ntrk2,Numb,Pak1,Palm,Pcbp2,Pdpk1,Penk,Prkcg,Plcb4,Ppp2ca,Prkar1b,Prnp,Ptk2b,Rheb,Ywhaz,Fxr2,Pacsin1,Map2k1,Mapk1,Mapk10,Pclo,Mpp2,Camk1,Dlg3,Cadm1,Srcin1,Snx1,Gsk3b,Rpl23,Vps35,C…
1_Member	GO Cellular Components	GO:0043197	dendritic spine	-21.9672	-19.751	54/193	11784,11785,11843,11848,12322,12330,12540,12846,12955,13196,13429,13838,14265,14810,14811,14812,14815,15387,15444,15481,17999,18212,18483,18747,19045,19047,19055,19229,19894,20541,23879,50997,54393,56440,56637,64009,66849,71994,77579,84092,97387,99371,103967,104027,108100,109689,110355,216831,217124,233908,242274,243725,268980,320127	Apba2,Apbb1,Arf4,Rhoa,Camk2a,Canx,Cdc42,Comt,Cryab,Asap1,Dnm1,Epha4,Fmr1,Grin1,Grin2a,Grin2b,Nr3c1,Hnrnpk,Hpca,Hspa8,Nedd4,Ntrk2,Palm,Prkaca,Ppp1ca,Ppp1cc,Ppp3ca,Ptk2b,Rph3a,Slc8a1,Fxr2,Mpp2,Gabbr1,Snx1,Gsk3b,Syne1,Ppp1r2,Cnn3,Myh10,Usp8,Strn4,Arfgef2,Dnm3,Synpo,Baiap2,Arrb1,Grk2,Arhgap44,Ppp1r9b,Fus,Lrrc7,Ppp1r9a,Strn,Dgki
1_Member	GO Cellular Components	GO:0044309	neuron spine	-21.3908	-19.2289	54/198	11784,11785,11843,11848,12322,12330,12540,12846,12955,13196,13429,13838,14265,14810,14811,14812,14815,15387,15444,15481,17999,18212,18483,18747,19045,19047,19055,19229,19894,20541,23879,50997,54393,56440,56637,64009,66849,71994,77579,84092,97387,99371,103967,104027,108100,109689,110355,216831,217124,233908,242274,243725,268980,320127	Apba2,Apbb1,Arf4,Rhoa,Camk2a,Canx,Cdc42,Comt,Cryab,Asap1,Dnm1,Epha4,Fmr1,Grin1,Grin2a,Grin2b,Nr3c1,Hnrnpk,Hpca,Hspa8,Nedd4,Ntrk2,Palm,Prkaca,Ppp1ca,Ppp1cc,Ppp3ca,Ptk2b,Rph3a,Slc8a1,Fxr2,Mpp2,Gabbr1,Snx1,Gsk3b,Syne1,Ppp1r2,Cnn3,Myh10,Usp8,Strn4,Arfgef2,Dnm3,Synpo,Baiap2,Arrb1,Grk2,Arhgap44,Ppp1r9b,Fus,Lrrc7,Ppp1r9a,Strn,Dgki
2_Summary	GO Cellular Components	GO:0030425	dendrite	-45.5711	-42.4798	153/719	11735,11784,11785,11789,11816,11843,11848,12308,12322,12323,12330,12334,12387,12540,12568,12709,12759,12846,12876,12889,12890,12891,12955,13116,13169,13196,13429,13838,14265,14360,14394,14395,14396,14682,14683,14704,14810,14811,14812,14815,15161,15387,15444,15481,15507,15516,15519,15572,16202,16438,16549,16560,16574,16646,16728,16971,17755,17756,17762,17918,17955,17999,18125,18195,18212,18458,184…	Ank3,Apba2,Apbb1,Apc,Apoe,Arf4,Rhoa,Calb2,Camk2a,Camk2b,Canx,Capn2,Ctnnb1,Cdc42,Cdk5,Ckb,Clu,Comt,Cpe,Cplx1,Cplx2,Cpne6,Cryab,Cyp46a1,Dbnl,Asap1,Dnm1,Epha4,Fmr1,Fyn,Gabra1,Gabra2,Gabra3,Gnaq,Gnas,Gng3,Grin1,Grin2a,Grin2b,Nr3c1,Hcfc1,Hnrnpk,Hpca,Hspa8,Hspb1,Hsp90ab1,Hsp90aa1,Elavl4,Ilk,Itpr1,Khsrp,Kif1a,Kif5c,Kpna1,L1cam,Lrp1,Map1b,Map2,Mapt,Myo5a,Nap1l4,Nedd4,Nos1,Nsf,Ntrk2,Pabpc1,Pak1,Palm,Penk,…
2_Member	GO Cellular Components	GO:0030425	dendrite	-45.5711	-42.4798	153/719	11735,11784,11785,11789,11816,11843,11848,12308,12322,12323,12330,12334,12387,12540,12568,12709,12759,12846,12876,12889,12890,12891,12955,13116,13169,13196,13429,13838,14265,14360,14394,14395,14396,14682,14683,14704,14810,14811,14812,14815,15161,15387,15444,15481,15507,15516,15519,15572,16202,16438,16549,16560,16574,16646,16728,16971,17755,17756,17762,17918,17955,17999,18125,18195,18212,18458,184…	Ank3,Apba2,Apbb1,Apc,Apoe,Arf4,Rhoa,Calb2,Camk2a,Camk2b,Canx,Capn2,Ctnnb1,Cdc42,Cdk5,Ckb,Clu,Comt,Cpe,Cplx1,Cplx2,Cpne6,Cryab,Cyp46a1,Dbnl,Asap1,Dnm1,Epha4,Fmr1,Fyn,Gabra1,Gabra2,Gabra3,Gnaq,Gnas,Gng3,Grin1,Grin2a,Grin2b,Nr3c1,Hcfc1,Hnrnpk,Hpca,Hspa8,Hspb1,Hsp90ab1,Hsp90aa1,Elavl4,Ilk,Itpr1,Khsrp,Kif1a,Kif5c,Kpna1,L1cam,Lrp1,Map1b,Map2,Mapt,Myo5a,Nap1l4,Nedd4,Nos1,Nsf,Ntrk2,Pabpc1,Pak1,Palm,Penk,…
2_Member	GO Cellular Components	GO:0097447	dendritic tree	-45.3306	-42.4154	153/722	11735,11784,11785,11789,11816,11843,11848,12308,12322,12323,12330,12334,12387,12540,12568,12709,12759,12846,12876,12889,12890,12891,12955,13116,13169,13196,13429,13838,14265,14360,14394,14395,14396,14682,14683,14704,14810,14811,14812,14815,15161,15387,15444,15481,15507,15516,15519,15572,16202,16438,16549,16560,16574,16646,16728,16971,17755,17756,17762,17918,17955,17999,18125,18195,18212,18458,184…	Ank3,Apba2,Apbb1,Apc,Apoe,Arf4,Rhoa,Calb2,Camk2a,Camk2b,Canx,Capn2,Ctnnb1,Cdc42,Cdk5,Ckb,Clu,Comt,Cpe,Cplx1,Cplx2,Cpne6,Cryab,Cyp46a1,Dbnl,Asap1,Dnm1,Epha4,Fmr1,Fyn,Gabra1,Gabra2,Gabra3,Gnaq,Gnas,Gng3,Grin1,Grin2a,Grin2b,Nr3c1,Hcfc1,Hnrnpk,Hpca,Hspa8,Hspb1,Hsp90ab1,Hsp90aa1,Elavl4,Ilk,Itpr1,Khsrp,Kif1a,Kif5c,Kpna1,L1cam,Lrp1,Map1b,Map2,Mapt,Myo5a,Nap1l4,Nedd4,Nos1,Nsf,Ntrk2,Pabpc1,Pak1,Palm,Penk,…
2_Member	GO Cellular Components	GO:0044297	cell body	-38.4446	-35.7513	151/798	11658,11785,11789,11816,12301,12322,12323,12330,12334,12461,12462,12464,12465,12466,12468,12469,12568,12704,12709,12846,12876,12889,12890,12955,13010,13039,13424,13628,13838,14228,14265,14360,14395,14567,14645,14682,14683,14704,14810,14812,14873,15161,15444,15481,15507,15516,15519,15572,16202,16438,16549,16560,16568,16574,16593,16728,16785,16971,17755,17756,17762,17918,17920,17955,18189,18212,184…	Alcam,Apbb1,Apc,Apoe,Cacybp,Camk2a,Camk2b,Canx,Capn2,Cct2,Cct3,Cct4,Cct5,Cct6a,Cct7,Cct8,Cdk5,Cit,Ckb,Comt,Cpe,Cplx1,Cplx2,Cryab,Cst3,Ctsl,Dync1h1,Eef1a2,Epha4,Fkbp4,Fmr1,Fyn,Gabra2,Gdi1,Glul,Gnaq,Gnas,Gng3,Grin1,Grin2b,Gsto1,Hcfc1,Hpca,Hspa8,Hspb1,Hsp90ab1,Hsp90aa1,Elavl4,Ilk,Itpr1,Khsrp,Kif1a,Kif3a,Kif5c,Klc1,L1cam,Rpsa,Lrp1,Map1b,Map2,Mapt,Myo5a,Myo6,Nap1l4,Nrxn1,Ntrk2,Pafah1b1,Pam,Pcmt1,Pde1b…
2_Member	GO Cellular Components	GO:0030424	axon	-34.6947	-32.0805	135/707	11658,11676,11735,11776,11785,11789,11820,11848,12215,12313,12322,12330,12386,12568,12759,12846,12889,12890,12891,12955,13010,13424,13426,13429,13518,13690,13806,13823,13838,14228,14265,14395,14415,14417,14489,14567,14645,14810,14811,14812,14873,15161,15387,15444,15481,15507,15516,15519,15572,16202,16498,16560,16568,16574,16593,16728,16971,17755,17756,17758,17762,17918,17920,18125,18189,18212,184…	Alcam,Aldoc,Ank3,Ap3d1,Apbb1,Apc,App,Rhoa,Bsg,Calm1,Camk2a,Canx,Ctnna2,Cdk5,Clu,Comt,Cplx1,Cplx2,Cpne6,Cryab,Cst3,Dync1h1,Dync1i1,Dnm1,Dst,Eif4g2,Eno1,Epb41l3,Epha4,Fkbp4,Fmr1,Gabra2,Gad1,Gad2,Mtpn,Gdi1,Glul,Grin1,Grin2a,Grin2b,Gsto1,Hcfc1,Hnrnpk,Hpca,Hspa8,Hspb1,Hsp90ab1,Hsp90aa1,Elavl4,Ilk,Kcnab2,Kif1a,Kif3a,Kif5c,Klc1,L1cam,Lrp1,Map1b,Map2,Map4,Mapt,Myo5a,Myo6,Nos1,Nrxn1,Ntrk2,Pafah1b1,Pak1,Pa…
2_Member	GO Cellular Components	GO:0043025	neuronal cell body	-33.1977	-30.7085	133/711	11658,11785,11789,11816,12322,12323,12330,12334,12568,12704,12709,12876,12889,12890,12955,13010,13039,13424,13628,13838,14228,14265,14395,14567,14645,14683,14810,14812,15161,15444,15481,15507,15516,15519,15572,16202,16438,16549,16560,16568,16574,16593,16728,16785,16971,17755,17756,17762,17918,17920,17955,18189,18212,18472,18484,18537,18574,18607,18619,19045,19060,19063,19229,19417,19744,20614,206…	Alcam,Apbb1,Apc,Apoe,Camk2a,Camk2b,Canx,Capn2,Cdk5,Cit,Ckb,Cpe,Cplx1,Cplx2,Cryab,Cst3,Ctsl,Dync1h1,Eef1a2,Epha4,Fkbp4,Fmr1,Gabra2,Gdi1,Glul,Gnas,Grin1,Grin2b,Hcfc1,Hpca,Hspa8,Hspb1,Hsp90ab1,Hsp90aa1,Elavl4,Ilk,Itpr1,Khsrp,Kif1a,Kif3a,Kif5c,Klc1,L1cam,Rpsa,Lrp1,Map1b,Map2,Mapt,Myo5a,Myo6,Nap1l4,Nrxn1,Ntrk2,Pafah1b1,Pam,Pcmt1,Pde1b,Pdpk1,Penk,Ppp1ca,Ppp5c,Ppt1,Ptk2b,Rasgrf1,Rheb,Snap25,Sort1,Serpin…
2_Member	GO Cellular Components	GO:0033267	axon part	-24.0589	-21.7805	89/448	11735,11776,11785,11789,11820,12313,12568,12759,12889,12890,13426,13429,13806,13823,13838,14228,14265,14415,14645,14810,14811,14812,15387,15481,15516,15519,15572,16202,16498,16568,16574,16593,16728,16971,17755,17756,17762,18125,18189,18212,18472,18479,18619,18751,18752,19052,19229,19339,19385,19387,19417,19941,20614,23969,26875,50876,52822,53310,54126,54393,54525,54725,56195,56637,64933,66849,678…	Ank3,Ap3d1,Apbb1,Apc,App,Calm1,Cdk5,Clu,Cplx1,Cplx2,Dync1i1,Dnm1,Eno1,Epb41l3,Epha4,Fkbp4,Fmr1,Gad1,Glul,Grin1,Grin2a,Grin2b,Hnrnpk,Hspa8,Hsp90ab1,Hsp90aa1,Elavl4,Ilk,Kcnab2,Kif3a,Kif5c,Klc1,L1cam,Lrp1,Map1b,Map2,Mapt,Nos1,Nrxn1,Ntrk2,Pafah1b1,Pak1,Penk,Prkcb,Prkcg,Ppp2ca,Ptk2b,Rab3a,Ranbp1,Rangap1,Rasgrf1,Rpl26,Snap25,Pacsin1,Pclo,Tmod2,Rufy3,Dlg3,Arhgef7,Gabbr1,Syt7,Cadm1,Ptbp2,Gsk3b,Ap3m2,Ppp1…
2_Member	GO Cellular Components	GO:0150034	distal axon	-20.8646	-18.7732	75/370	11776,11785,11789,11820,12313,12568,12759,12889,12890,13806,13838,14228,14265,14415,14645,14810,14811,14812,15387,15481,15516,15519,15572,16202,16498,16574,16593,16728,16971,17755,17756,17762,18125,18189,18212,18472,18479,18619,18751,18752,19052,19229,19339,19417,19941,20614,23969,26875,50876,52822,53310,54126,54525,56195,56637,66849,67808,68585,69017,69654,71960,73340,74326,76499,77579,94229,192…	Ap3d1,Apbb1,Apc,App,Calm1,Cdk5,Clu,Cplx1,Cplx2,Eno1,Epha4,Fkbp4,Fmr1,Gad1,Glul,Grin1,Grin2a,Grin2b,Hnrnpk,Hspa8,Hsp90ab1,Hsp90aa1,Elavl4,Ilk,Kcnab2,Kif5c,Klc1,L1cam,Lrp1,Map1b,Map2,Mapt,Nos1,Nrxn1,Ntrk2,Pafah1b1,Pak1,Penk,Prkcb,Prkcg,Ppp2ca,Ptk2b,Rab3a,Rasgrf1,Rpl26,Snap25,Pacsin1,Pclo,Tmod2,Rufy3,Dlg3,Arhgef7,Syt7,Ptbp2,Gsk3b,Ppp1r2,Tprgl,Rtn4,Prrt2,Dctn2,Myh14,Nptxr,Hnrnpr,Clasp2,Myh10,Slc4a10,…
2_Member	GO Cellular Components	GO:0030427	site of polarized growth	-17.3004	-15.3231	50/208	11785,11789,11820,12313,12568,12759,13169,13806,13838,14228,14265,14810,15516,15519,15572,16574,16593,16728,16971,17755,17756,17762,18189,18212,18472,18479,19229,19417,20614,26875,50876,52822,53310,54126,56195,56637,66849,68585,69654,71960,73340,74326,76499,77579,84095,192176,217124,243725,381921,382253	Apbb1,Apc,App,Calm1,Cdk5,Clu,Dbnl,Eno1,Epha4,Fkbp4,Fmr1,Grin1,Hsp90ab1,Hsp90aa1,Elavl4,Kif5c,Klc1,L1cam,Lrp1,Map1b,Map2,Mapt,Nrxn1,Ntrk2,Pafah1b1,Pak1,Ptk2b,Rasgrf1,Snap25,Pclo,Tmod2,Rufy3,Dlg3,Arhgef7,Ptbp2,Gsk3b,Ppp1r2,Rtn4,Dctn2,Myh14,Nptxr,Hnrnpr,Clasp2,Myh10,Pi4k2a,Flna,Ppp1r9b,Ppp1r9a,Taok2,Cdkl5
2_Member	GO Cellular Components	GO:0030426	growth cone	-16.3231	-14.4079	48/203	11785,11789,11820,12313,12568,12759,13806,13838,14228,14265,14810,15516,15519,15572,16574,16593,16728,16971,17755,17756,17762,18189,18212,18472,18479,19229,19417,20614,26875,50876,52822,53310,54126,56195,56637,66849,68585,69654,71960,73340,74326,76499,77579,192176,217124,243725,381921,382253	Apbb1,Apc,App,Calm1,Cdk5,Clu,Eno1,Epha4,Fkbp4,Fmr1,Grin1,Hsp90ab1,Hsp90aa1,Elavl4,Kif5c,Klc1,L1cam,Lrp1,Map1b,Map2,Mapt,Nrxn1,Ntrk2,Pafah1b1,Pak1,Ptk2b,Rasgrf1,Snap25,Pclo,Tmod2,Rufy3,Dlg3,Arhgef7,Ptbp2,Gsk3b,Ppp1r2,Rtn4,Dctn2,Myh14,Nptxr,Hnrnpr,Clasp2,Myh10,Flna,Ppp1r9b,Ppp1r9a,Taok2,Cdkl5
3_Summary	GO Cellular Components	GO:0098793	presynapse	-27.5653	-25.2521	107/558	11776,11784,11785,11820,12293,12298,12313,12322,12330,12386,12387,12889,12890,13116,13429,13838,13854,14265,14395,14415,14417,14645,14810,14811,14812,15384,15387,15481,16202,16438,16498,16560,16728,17918,17920,17957,18125,18189,18190,18212,18619,18643,18751,18752,18754,18952,19045,19047,19052,19063,19326,19338,19339,19342,19344,19346,19349,19894,19941,20362,20614,22365,22393,22628,22629,23969,240…	Ap3d1,Apba2,Apbb1,App,Cacna2d1,Cacnb4,Calm1,Camk2a,Canx,Ctnna2,Ctnnb1,Cplx1,Cplx2,Cyp46a1,Dnm1,Epha4,Epn1,Fmr1,Gabra2,Gad1,Gad2,Glul,Grin1,Grin2a,Grin2b,Hnrnpab,Hnrnpk,Hspa8,Ilk,Itpr1,Kcnab2,Kif1a,L1cam,Myo5a,Myo6,Napb,Nos1,Nrxn1,Nrxn2,Ntrk2,Penk,Pfn1,Prkcb,Prkcg,Prkce,Sept4,Ppp1ca,Ppp1cc,Ppp2ca,Ppt1,Rab11b,Rab33b,Rab3a,Rab4b,Rab5b,Rab6a,Rab7,Rph3a,Rpl26,Sept8,Snap25,Vps45,Wfs1,Ywhag,Ywhah,Pacsin…
3_Member	GO Cellular Components	GO:0098793	presynapse	-27.5653	-25.2521	107/558	11776,11784,11785,11820,12293,12298,12313,12322,12330,12386,12387,12889,12890,13116,13429,13838,13854,14265,14395,14415,14417,14645,14810,14811,14812,15384,15387,15481,16202,16438,16498,16560,16728,17918,17920,17957,18125,18189,18190,18212,18619,18643,18751,18752,18754,18952,19045,19047,19052,19063,19326,19338,19339,19342,19344,19346,19349,19894,19941,20362,20614,22365,22393,22628,22629,23969,240…	Ap3d1,Apba2,Apbb1,App,Cacna2d1,Cacnb4,Calm1,Camk2a,Canx,Ctnna2,Ctnnb1,Cplx1,Cplx2,Cyp46a1,Dnm1,Epha4,Epn1,Fmr1,Gabra2,Gad1,Gad2,Glul,Grin1,Grin2a,Grin2b,Hnrnpab,Hnrnpk,Hspa8,Ilk,Itpr1,Kcnab2,Kif1a,L1cam,Myo5a,Myo6,Napb,Nos1,Nrxn1,Nrxn2,Ntrk2,Penk,Pfn1,Prkcb,Prkcg,Prkce,Sept4,Ppp1ca,Ppp1cc,Ppp2ca,Ppt1,Rab11b,Rab33b,Rab3a,Rab4b,Rab5b,Rab6a,Rab7,Rph3a,Rpl26,Sept8,Snap25,Vps45,Wfs1,Ywhag,Ywhah,Pacsin…
3_Member	GO Cellular Components	GO:0044433	cytoplasmic vesicle part	-19.4002	-17.3696	89/521	11750,11765,11773,11776,11852,12215,12306,12313,12492,12847,12876,13033,13660,13838,13855,14395,14417,16438,16784,17698,17988,18484,18619,19326,19339,19342,19344,19349,19894,20255,20334,20479,20661,22041,22042,22088,22201,22317,22365,22393,29873,30930,52551,53612,54160,54161,54198,54418,54645,56041,56382,56440,56447,65114,66082,66237,66251,66508,66530,66914,67295,67602,67826,67898,68299,68365,685…	Anxa7,Ap1g1,Ap2m1,Ap3d1,Rhob,Bsg,Anxa2,Calm1,Scarb2,Copa,Cpe,Ctsd,Ehd1,Epha4,Epn2,Gabra2,Gad2,Itpr1,Lamp2,Msn,Ndrg1,Pam,Penk,Rab11b,Rab3a,Rab4b,Rab5b,Rab7,Rph3a,Scg3,Sec23a,Vps4b,Sort1,Trf,Tfrc,Tsg101,Uba1,Vamp1,Vps45,Wfs1,Cspg5,Vps26a,Sgta,Vti1b,Copg2,Copg1,Snx3,Fmn2,Gripap1,Uso1,Rab9,Snx1,Copz1,Vps35,Abhd6,Atp6v1g2,Arfgap3,Lamtor1,Ubxn6,Vps28,Rab3c,Necap1,Snap47,Pef1,Vps53,Rab14,Lamtor5,Tmed10,…
3_Member	GO Cellular Components	GO:0012506	vesicle membrane	-14.9355	-13.0746	61/332	11750,11765,11773,11938,12215,12313,12492,12847,12876,13855,14395,14417,14784,16438,16784,17698,17920,18125,18484,19326,19339,19342,19344,19349,19894,20255,20334,20661,22041,22317,22393,52551,53612,54160,54161,54418,56041,56382,56447,66237,66251,67295,67602,67826,67898,68365,68581,70349,72993,74006,77038,84095,99683,107767,213827,216344,218811,229706,234678,271457,381677	Anxa7,Ap1g1,Ap2m1,Atp2a2,Bsg,Calm1,Scarb2,Copa,Cpe,Epn2,Gabra2,Gad2,Grb2,Itpr1,Lamp2,Msn,Myo6,Nos1,Pam,Rab11b,Rab3a,Rab4b,Rab5b,Rab7,Rph3a,Scg3,Sec23a,Sort1,Trf,Vamp1,Wfs1,Sgta,Vti1b,Copg2,Copg1,Fmn2,Uso1,Rab9,Copz1,Atp6v1g2,Arfgap3,Rab3c,Necap1,Snap47,Pef1,Rab14,Tmed10,Copb1,Appl1,Dnm1l,Arfgap2,Pi4k2a,Sec24b,Scamp1,Arcn1,Rab21,Sec24c,Slc6a17,D230025D16Rik,Rab5a,Vgf
3_Member	GO Cellular Components	GO:0030133	transport vesicle	-13.5908	-11.8005	58/326	11765,11784,11820,12313,13429,14395,14417,14683,14810,14811,14812,15481,16560,17918,18619,18952,19063,19326,19339,19342,19344,19346,19349,19894,20334,20614,20661,20981,22365,22393,26875,52551,53612,54393,54525,54725,56041,56398,66237,66290,67295,67397,67808,67826,67898,68365,69017,74006,84095,99683,107767,111173,218811,229706,234678,245860,271457,320127	Ap1g1,Apba2,App,Calm1,Dnm1,Gabra2,Gad2,Gnas,Grin1,Grin2a,Grin2b,Hspa8,Kif1a,Myo5a,Penk,Sept4,Ppt1,Rab11b,Rab3a,Rab4b,Rab5b,Rab6a,Rab7,Rph3a,Sec23a,Snap25,Sort1,Syt3,Vps45,Wfs1,Pclo,Sgta,Vti1b,Gabbr1,Syt7,Cadm1,Uso1,Chp1,Atp6v1g2,Atp6v1g1,Rab3c,Erp29,Tprgl,Snap47,Pef1,Rab14,Prrt2,Dnm1l,Pi4k2a,Sec24b,Scamp1,Erc1,Sec24c,Slc6a17,D230025D16Rik,Atg9a,Rab5a,Dgki
3_Member	GO Cellular Components	GO:0030659	cytoplasmic vesicle membrane	-13.1085	-11.3289	55/306	11750,11765,11773,12215,12313,12492,12847,12876,13855,14395,14417,16438,16784,17698,18484,19326,19339,19342,19344,19349,19894,20255,20334,20661,22041,22317,22393,52551,53612,54160,54161,54418,56041,56382,56447,66237,66251,67295,67602,67826,67898,68365,68581,70349,74006,77038,84095,99683,107767,213827,218811,229706,234678,271457,381677	Anxa7,Ap1g1,Ap2m1,Bsg,Calm1,Scarb2,Copa,Cpe,Epn2,Gabra2,Gad2,Itpr1,Lamp2,Msn,Pam,Rab11b,Rab3a,Rab4b,Rab5b,Rab7,Rph3a,Scg3,Sec23a,Sort1,Trf,Vamp1,Wfs1,Sgta,Vti1b,Copg2,Copg1,Fmn2,Uso1,Rab9,Copz1,Atp6v1g2,Arfgap3,Rab3c,Necap1,Snap47,Pef1,Rab14,Tmed10,Copb1,Dnm1l,Arfgap2,Pi4k2a,Sec24b,Scamp1,Arcn1,Sec24c,Slc6a17,D230025D16Rik,Rab5a,Vgf
3_Member	GO Cellular Components	GO:0008021	synaptic vesicle	-12.1664	-10.4075	45/230	11784,11820,12313,13429,14395,14417,14810,14811,14812,15481,16560,17918,18619,18952,19063,19326,19339,19342,19344,19349,19894,20614,22365,22393,52551,53612,54393,54525,54725,66237,66290,67295,67808,67826,68365,69017,74006,84095,107767,111173,229706,234678,245860,271457,320127	Apba2,App,Calm1,Dnm1,Gabra2,Gad2,Grin1,Grin2a,Grin2b,Hspa8,Kif1a,Myo5a,Penk,Sept4,Ppt1,Rab11b,Rab3a,Rab4b,Rab5b,Rab7,Rph3a,Snap25,Vps45,Wfs1,Sgta,Vti1b,Gabbr1,Syt7,Cadm1,Atp6v1g2,Atp6v1g1,Rab3c,Tprgl,Snap47,Rab14,Prrt2,Dnm1l,Pi4k2a,Scamp1,Erc1,Slc6a17,D230025D16Rik,Atg9a,Rab5a,Dgki
3_Member	GO Cellular Components	GO:0070382	exocytic vesicle	-12.0844	-10.3453	47/249	11784,11820,12313,13429,14395,14417,14810,14811,14812,15481,16560,17918,18619,18952,19063,19326,19339,19342,19344,19346,19349,19894,20614,20981,22365,22393,52551,53612,54393,54525,54725,66237,66290,67295,67808,67826,68365,69017,74006,84095,107767,111173,229706,234678,245860,271457,320127	Apba2,App,Calm1,Dnm1,Gabra2,Gad2,Grin1,Grin2a,Grin2b,Hspa8,Kif1a,Myo5a,Penk,Sept4,Ppt1,Rab11b,Rab3a,Rab4b,Rab5b,Rab6a,Rab7,Rph3a,Snap25,Syt3,Vps45,Wfs1,Sgta,Vti1b,Gabbr1,Syt7,Cadm1,Atp6v1g2,Atp6v1g1,Rab3c,Tprgl,Snap47,Rab14,Prrt2,Dnm1l,Pi4k2a,Scamp1,Erc1,Slc6a17,D230025D16Rik,Atg9a,Rab5a,Dgki
3_Member	GO Cellular Components	GO:0030658	transport vesicle membrane	-7.8999	-6.43184	28/142	11765,12313,14395,14417,19326,19339,19342,19344,19349,19894,20334,22393,52551,53612,56041,66237,67295,67826,67898,68365,74006,84095,99683,107767,218811,229706,234678,271457	Ap1g1,Calm1,Gabra2,Gad2,Rab11b,Rab3a,Rab4b,Rab5b,Rab7,Rph3a,Sec23a,Wfs1,Sgta,Vti1b,Uso1,Atp6v1g2,Rab3c,Snap47,Pef1,Rab14,Dnm1l,Pi4k2a,Sec24b,Scamp1,Sec24c,Slc6a17,D230025D16Rik,Rab5a
3_Member	GO Cellular Components	GO:0030672	synaptic vesicle membrane	-5.78193	-4.51992	21/111	12313,14395,14417,19326,19339,19342,19344,19349,19894,22393,52551,66237,67295,67826,68365,74006,84095,107767,229706,234678,271457	Calm1,Gabra2,Gad2,Rab11b,Rab3a,Rab4b,Rab5b,Rab7,Rph3a,Wfs1,Sgta,Atp6v1g2,Rab3c,Snap47,Rab14,Dnm1l,Pi4k2a,Scamp1,Slc6a17,D230025D16Rik,Rab5a
3_Member	GO Cellular Components	GO:0099501	exocytic vesicle membrane	-5.78193	-4.51992	21/111	12313,14395,14417,19326,19339,19342,19344,19349,19894,22393,52551,66237,67295,67826,68365,74006,84095,107767,229706,234678,271457	Calm1,Gabra2,Gad2,Rab11b,Rab3a,Rab4b,Rab5b,Rab7,Rph3a,Wfs1,Sgta,Atp6v1g2,Rab3c,Snap47,Rab14,Dnm1l,Pi4k2a,Scamp1,Slc6a17,D230025D16Rik,Rab5a
3_Member	GO Cellular Components	GO:0098993	anchored component of synaptic vesicle membrane	-5.24072	-4.03022	8/19	19326,19339,19342,19344,19349,67295,68365,271457	Rab11b,Rab3a,Rab4b,Rab5b,Rab7,Rab3c,Rab14,Rab5a
3_Member	GO Cellular Components	GO:0098563	intrinsic component of synaptic vesicle membrane	-4.1425	-3.03571	13/64	14395,19326,19339,19342,19344,19349,22393,66237,67295,68365,107767,229706,271457	Gabra2,Rab11b,Rab3a,Rab4b,Rab5b,Rab7,Wfs1,Atp6v1g2,Rab3c,Rab14,Scamp1,Slc6a17,Rab5a
4_Summary	GO Cellular Components	GO:0043209	myelin sheath	-22.103	-19.8568	57/213	11657,11674,11964,11966,12306,12313,12330,12461,12462,12465,12540,12709,12861,12955,13429,13627,13628,13660,13806,14567,14569,14645,14751,14827,14828,14862,14873,15481,15519,15526,17698,17957,17988,18195,18571,18746,18952,19684,20362,20614,21454,21881,22223,22628,23969,54130,56370,66469,68585,71960,77767,78294,108123,108124,140559,236539,269523	Alb,Aldoa,Atp6v1a,Atp6v1b2,Anxa2,Calm1,Canx,Cct2,Cct3,Cct5,Cdc42,Ckb,Cox6a1,Cryab,Dnm1,Eef1a1,Eef1a2,Ehd1,Eno1,Gdi1,Gdi2,Glul,Gpi1,Pdia3,Hspa5,Gstm1,Gsto1,Hspa8,Hsp90aa1,Hspa9,Msn,Napb,Ndrg1,Nsf,Pdcd6ip,Pkm,Sept4,Rdx,Sept8,Snap25,Tcp1,Tkt,Uchl1,Ywhag,Pacsin1,Actr1a,Tagln3,Prxl2b,Rtn4,Myh14,Ermn,Rps27a,Napg,Napa,Igsf8,Phgdh,Vcp
4_Member	GO Cellular Components	GO:0043209	myelin sheath	-22.103	-19.8568	57/213	11657,11674,11964,11966,12306,12313,12330,12461,12462,12465,12540,12709,12861,12955,13429,13627,13628,13660,13806,14567,14569,14645,14751,14827,14828,14862,14873,15481,15519,15526,17698,17957,17988,18195,18571,18746,18952,19684,20362,20614,21454,21881,22223,22628,23969,54130,56370,66469,68585,71960,77767,78294,108123,108124,140559,236539,269523	Alb,Aldoa,Atp6v1a,Atp6v1b2,Anxa2,Calm1,Canx,Cct2,Cct3,Cct5,Cdc42,Ckb,Cox6a1,Cryab,Dnm1,Eef1a1,Eef1a2,Ehd1,Eno1,Gdi1,Gdi2,Glul,Gpi1,Pdia3,Hspa5,Gstm1,Gsto1,Hspa8,Hsp90aa1,Hspa9,Msn,Napb,Ndrg1,Nsf,Pdcd6ip,Pkm,Sept4,Rdx,Sept8,Snap25,Tcp1,Tkt,Uchl1,Ywhag,Pacsin1,Actr1a,Tagln3,Prxl2b,Rtn4,Myh14,Ermn,Rps27a,Napg,Napa,Igsf8,Phgdh,Vcp
5_Summary	GO Cellular Components	GO:0048471	perinuclear region of cytoplasm	-21.7293	-19.5411	106/645	11737,11765,11785,11789,11803,11820,11938,12306,12334,12387,12652,12759,13010,13030,13209,13426,13518,13660,13682,13684,13829,14228,14265,14360,14417,14683,15388,15481,15516,15519,16438,16784,16971,17698,17755,17920,17988,18125,18212,18472,18484,18747,18752,18754,18810,19035,19182,19229,19230,19339,19342,19387,20239,20262,20334,20614,20661,22027,22041,22042,22608,22631,23789,23969,26395,26875,298…	Anp32a,Ap1g1,Apbb1,Apc,Aplp1,App,Atp2a2,Anxa2,Capn2,Ctnnb1,Chga,Clu,Cst3,Ctsb,Ddx6,Dync1i1,Dst,Ehd1,Eif4a2,Eif4e,Dmtn,Fkbp4,Fmr1,Fyn,Gad2,Gnas,Hnrnpl,Hspa8,Hsp90ab1,Hsp90aa1,Itpr1,Lamp2,Lrp1,Msn,Map1b,Myo6,Ndrg1,Nos1,Ntrk2,Pafah1b1,Pam,Prkaca,Prkcg,Prkce,Plec,Ppib,Psmc3,Ptk2b,Twf1,Rab3a,Rab4b,Rangap1,Atxn2,Stmn3,Sec23a,Snap25,Sort1,Hsp90b1,Trf,Tfrc,Ybx1,Ywhaz,Coro1b,Pacsin1,Map2k1,Pclo,Clic4,Vapa…
5_Member	GO Cellular Components	GO:0048471	perinuclear region of cytoplasm	-21.7293	-19.5411	106/645	11737,11765,11785,11789,11803,11820,11938,12306,12334,12387,12652,12759,13010,13030,13209,13426,13518,13660,13682,13684,13829,14228,14265,14360,14417,14683,15388,15481,15516,15519,16438,16784,16971,17698,17755,17920,17988,18125,18212,18472,18484,18747,18752,18754,18810,19035,19182,19229,19230,19339,19342,19387,20239,20262,20334,20614,20661,22027,22041,22042,22608,22631,23789,23969,26395,26875,298…	Anp32a,Ap1g1,Apbb1,Apc,Aplp1,App,Atp2a2,Anxa2,Capn2,Ctnnb1,Chga,Clu,Cst3,Ctsb,Ddx6,Dync1i1,Dst,Ehd1,Eif4a2,Eif4e,Dmtn,Fkbp4,Fmr1,Fyn,Gad2,Gnas,Hnrnpl,Hspa8,Hsp90ab1,Hsp90aa1,Itpr1,Lamp2,Lrp1,Msn,Map1b,Myo6,Ndrg1,Nos1,Ntrk2,Pafah1b1,Pam,Prkaca,Prkcg,Prkce,Plec,Ppib,Psmc3,Ptk2b,Twf1,Rab3a,Rab4b,Rangap1,Atxn2,Stmn3,Sec23a,Snap25,Sort1,Hsp90b1,Trf,Tfrc,Ybx1,Ywhaz,Coro1b,Pacsin1,Map2k1,Pclo,Clic4,Vapa…
6_Summary	GO Cellular Components	GO:0015629	actin cytoskeleton	-21.1852	-19.0481	89/491	11674,12306,12308,12331,12385,12386,12632,12704,12955,13007,13169,13196,13211,13518,13627,13800,13829,14360,14457,14489,15381,16202,16480,17118,17756,17886,17904,17918,17920,18479,18571,19230,19247,19684,20411,20525,20614,21916,22428,22793,23789,26419,26936,29810,50876,53598,54130,54418,56013,56351,56431,56444,56737,59288,60595,63985,66395,67252,67665,67938,69654,69807,71732,71960,71994,72157,731…	Aldoa,Anxa2,Calb2,Cap1,Ctnna1,Ctnna2,Cfl2,Cit,Cryab,Csrp1,Dbnl,Asap1,Dhx9,Dst,Eef1a1,Enah,Dmtn,Fyn,Gas7,Mtpn,Hnrnpc,Ilk,Jup,Marcks,Map2,Myh9,Myl6,Myo5a,Myo6,Pak1,Pdcd6ip,Twf1,Ptpn11,Rdx,Sorbs1,Slc2a1,Snap25,Tmod1,Dctn6,Zyx,Coro1b,Mapk8,Mprip,Bag3,Tmod2,Dctn3,Actr1a,Fmn2,Srcin1,Ptges3,Dstn,Actr10,Alg2,Dctn5,Actn4,Gmfb,Ahnak,Cap2,Dctn4,Myl12b,Dctn2,Trim32,Vps11,Myh14,Cnn3,Pgm2,Wasl,Arpc5l,Sipa1l3,L…
6_Member	GO Cellular Components	GO:0015629	actin cytoskeleton	-21.1852	-19.0481	89/491	11674,12306,12308,12331,12385,12386,12632,12704,12955,13007,13169,13196,13211,13518,13627,13800,13829,14360,14457,14489,15381,16202,16480,17118,17756,17886,17904,17918,17920,18479,18571,19230,19247,19684,20411,20525,20614,21916,22428,22793,23789,26419,26936,29810,50876,53598,54130,54418,56013,56351,56431,56444,56737,59288,60595,63985,66395,67252,67665,67938,69654,69807,71732,71960,71994,72157,731…	Aldoa,Anxa2,Calb2,Cap1,Ctnna1,Ctnna2,Cfl2,Cit,Cryab,Csrp1,Dbnl,Asap1,Dhx9,Dst,Eef1a1,Enah,Dmtn,Fyn,Gas7,Mtpn,Hnrnpc,Ilk,Jup,Marcks,Map2,Myh9,Myl6,Myo5a,Myo6,Pak1,Pdcd6ip,Twf1,Ptpn11,Rdx,Sorbs1,Slc2a1,Snap25,Tmod1,Dctn6,Zyx,Coro1b,Mapk8,Mprip,Bag3,Tmod2,Dctn3,Actr1a,Fmn2,Srcin1,Ptges3,Dstn,Actr10,Alg2,Dctn5,Actn4,Gmfb,Ahnak,Cap2,Dctn4,Myl12b,Dctn2,Trim32,Vps11,Myh14,Cnn3,Pgm2,Wasl,Arpc5l,Sipa1l3,L…
6_Member	GO Cellular Components	GO:0032432	actin filament bundle	-9.8845	-8.24803	25/95	12306,12955,13518,13800,16202,17118,17886,19247,20411,22793,23789,26936,29810,60595,67665,67938,71960,74206,77569,77579,102866,104027,192176,218952,226251	Anxa2,Cryab,Dst,Enah,Ilk,Marcks,Myh9,Ptpn11,Sorbs1,Zyx,Coro1b,Mprip,Bag3,Actn4,Dctn4,Myl12b,Myh14,Sipa1l3,Limch1,Myh10,Pls3,Synpo,Flna,Fermt2,Ablim1
6_Member	GO Cellular Components	GO:0042641	actomyosin	-8.92077	-7.34134	24/97	12306,13518,13800,16202,17886,17918,18571,19247,20411,22793,23789,26936,29810,60595,67665,67938,71960,74206,77569,77579,104027,218952,226251,360013	Anxa2,Dst,Enah,Ilk,Myh9,Myo5a,Pdcd6ip,Ptpn11,Sorbs1,Zyx,Coro1b,Mprip,Bag3,Actn4,Dctn4,Myl12b,Myh14,Sipa1l3,Limch1,Myh10,Synpo,Fermt2,Ablim1,Myo18a
6_Member	GO Cellular Components	GO:0001725	stress fiber	-7.77879	-6.33092	21/86	12306,13518,13800,16202,17886,19247,20411,22793,23789,26936,29810,60595,67665,67938,71960,74206,77569,77579,104027,218952,226251	Anxa2,Dst,Enah,Ilk,Myh9,Ptpn11,Sorbs1,Zyx,Coro1b,Mprip,Bag3,Actn4,Dctn4,Myl12b,Myh14,Sipa1l3,Limch1,Myh10,Synpo,Fermt2,Ablim1
6_Member	GO Cellular Components	GO:0097517	contractile actin filament bundle	-7.77879	-6.33092	21/86	12306,13518,13800,16202,17886,19247,20411,22793,23789,26936,29810,60595,67665,67938,71960,74206,77569,77579,104027,218952,226251	Anxa2,Dst,Enah,Ilk,Myh9,Ptpn11,Sorbs1,Zyx,Coro1b,Mprip,Bag3,Actn4,Dctn4,Myl12b,Myh14,Sipa1l3,Limch1,Myh10,Synpo,Fermt2,Ablim1
7_Summary	GO Cellular Components	GO:0005874	microtubule	-21.0585	-18.9449	81/420	11789,11816,12461,12462,12464,12465,12466,12468,12469,12568,13424,13426,13429,13518,13669,14228,14265,15481,15505,16498,16560,16563,16564,16568,16574,16593,16594,16765,17755,17756,17758,17762,17918,17988,18221,18472,20541,21454,22070,26395,26554,51810,51944,53598,56350,56430,56637,57436,66734,67068,67117,67443,69654,70762,72416,73242,74006,74237,75786,76499,76707,99371,99512,100732,101706,103967,…	Apc,Apoe,Cct2,Cct3,Cct4,Cct5,Cct6a,Cct7,Cct8,Cdk5,Dync1h1,Dync1i1,Dnm1,Dst,Eif3a,Fkbp4,Fmr1,Hspa8,Hsph1,Kcnab2,Kif1a,Kif2a,Kif21a,Kif3a,Kif5c,Klc1,Klc2,Stmn1,Map1b,Map2,Map4,Mapt,Myo5a,Ndrg1,Nudc,Pafah1b1,Slc8a1,Tcp1,Tpt1,Map2k1,Cul3,Hnrnpu,Knstrn,Dctn3,Arl3,Clip1,Gsk3b,Gabarapl1,Map1lc3a,Dynlrb1,Dynlt3,Map1lc3b,Dctn2,Dclk2,Lrpprc,Atat1,Dnm1l,Tubgcp2,Ckap5,Clasp2,Clasp1,Arfgef2,Wdr47,Mapre3,Numa1…
7_Member	GO Cellular Components	GO:0005874	microtubule	-21.0585	-18.9449	81/420	11789,11816,12461,12462,12464,12465,12466,12468,12469,12568,13424,13426,13429,13518,13669,14228,14265,15481,15505,16498,16560,16563,16564,16568,16574,16593,16594,16765,17755,17756,17758,17762,17918,17988,18221,18472,20541,21454,22070,26395,26554,51810,51944,53598,56350,56430,56637,57436,66734,67068,67117,67443,69654,70762,72416,73242,74006,74237,75786,76499,76707,99371,99512,100732,101706,103967,…	Apc,Apoe,Cct2,Cct3,Cct4,Cct5,Cct6a,Cct7,Cct8,Cdk5,Dync1h1,Dync1i1,Dnm1,Dst,Eif3a,Fkbp4,Fmr1,Hspa8,Hsph1,Kcnab2,Kif1a,Kif2a,Kif21a,Kif3a,Kif5c,Klc1,Klc2,Stmn1,Map1b,Map2,Map4,Mapt,Myo5a,Ndrg1,Nudc,Pafah1b1,Slc8a1,Tcp1,Tpt1,Map2k1,Cul3,Hnrnpu,Knstrn,Dctn3,Arl3,Clip1,Gsk3b,Gabarapl1,Map1lc3a,Dynlrb1,Dynlt3,Map1lc3b,Dctn2,Dclk2,Lrpprc,Atat1,Dnm1l,Tubgcp2,Ckap5,Clasp2,Clasp1,Arfgef2,Wdr47,Mapre3,Numa1…
7_Member	GO Cellular Components	GO:0099513	polymeric cytoskeletal fiber	-18.8717	-16.8596	103/671	11789,11816,12461,12462,12464,12465,12466,12468,12469,12568,13169,13209,13424,13426,13429,13518,13669,13829,14228,14265,14360,14457,14609,15481,15505,16480,16498,16560,16563,16564,16568,16574,16593,16594,16765,17755,17756,17758,17762,17918,17920,17988,18221,18472,18479,18810,19230,20541,21454,21916,22070,23789,26395,26554,51810,51944,53598,54418,56350,56351,56430,56637,57436,66734,67068,67117,674…	Apc,Apoe,Cct2,Cct3,Cct4,Cct5,Cct6a,Cct7,Cct8,Cdk5,Dbnl,Ddx6,Dync1h1,Dync1i1,Dnm1,Dst,Eif3a,Dmtn,Fkbp4,Fmr1,Fyn,Gas7,Gja1,Hspa8,Hsph1,Jup,Kcnab2,Kif1a,Kif2a,Kif21a,Kif3a,Kif5c,Klc1,Klc2,Stmn1,Map1b,Map2,Map4,Mapt,Myo5a,Myo6,Ndrg1,Nudc,Pafah1b1,Pak1,Plec,Twf1,Slc8a1,Tcp1,Tmod1,Tpt1,Coro1b,Map2k1,Cul3,Hnrnpu,Knstrn,Dctn3,Fmn2,Arl3,Ptges3,Clip1,Gsk3b,Gabarapl1,Map1lc3a,Dynlrb1,Dynlt3,Map1lc3b,Dctn2,D…
8_Summary	GO Cellular Components	GO:0000502	proteasome complex	-20.414	-18.3439	31/66	15507,17463,19166,19170,19172,19175,19179,19182,19184,19185,19359,21762,22123,22393,23996,23997,26440,26441,26442,26444,53382,56207,57296,59025,59029,66413,66997,67089,69077,70247,269523	Hspb1,Psmd7,Psma2,Psmb1,Psmb4,Psmb6,Psmc1,Psmc3,Psmc5,Psmd4,Rad23b,Psmd2,Psmd3,Wfs1,Psmc4,Psmd13,Psma1,Psma4,Psma5,Psma7,Txnl1,Uchl5,Psmd8,Usp14,Psmd14,Psmd6,Psmd12,Psmc6,Psmd11,Psmd1,Vcp
8_Member	GO Cellular Components	GO:0000502	proteasome complex	-20.414	-18.3439	31/66	15507,17463,19166,19170,19172,19175,19179,19182,19184,19185,19359,21762,22123,22393,23996,23997,26440,26441,26442,26444,53382,56207,57296,59025,59029,66413,66997,67089,69077,70247,269523	Hspb1,Psmd7,Psma2,Psmb1,Psmb4,Psmb6,Psmc1,Psmc3,Psmc5,Psmd4,Rad23b,Psmd2,Psmd3,Wfs1,Psmc4,Psmd13,Psma1,Psma4,Psma5,Psma7,Txnl1,Uchl5,Psmd8,Usp14,Psmd14,Psmd6,Psmd12,Psmc6,Psmd11,Psmd1,Vcp
8_Member	GO Cellular Components	GO:1905369	endopeptidase complex	-20.169	-18.119	31/67	15507,17463,19166,19170,19172,19175,19179,19182,19184,19185,19359,21762,22123,22393,23996,23997,26440,26441,26442,26444,53382,56207,57296,59025,59029,66413,66997,67089,69077,70247,269523	Hspb1,Psmd7,Psma2,Psmb1,Psmb4,Psmb6,Psmc1,Psmc3,Psmc5,Psmd4,Rad23b,Psmd2,Psmd3,Wfs1,Psmc4,Psmd13,Psma1,Psma4,Psma5,Psma7,Txnl1,Uchl5,Psmd8,Usp14,Psmd14,Psmd6,Psmd12,Psmc6,Psmd11,Psmd1,Vcp
8_Member	KEGG Structural Complexes	M00341	Proteasome, 19S regulatory particle (PA700)	-16.8409	-14.8957	16/19	17463,19179,19182,19184,19185,21762,22123,23996,23997,57296,59029,66413,66997,67089,69077,70247	Psmd7,Psmc1,Psmc3,Psmc5,Psmd4,Psmd2,Psmd3,Psmc4,Psmd13,Psmd8,Psmd14,Psmd6,Psmd12,Psmc6,Psmd11,Psmd1
8_Member	KEGG Structural Complexes	mmu_M00341	Proteasome, 19S regulatory particle (PA700)	-16.8409	-14.8957	16/19	17463,19179,19182,19184,19185,21762,22123,23996,23997,57296,59029,66413,66997,67089,69077,70247	Psmd7,Psmc1,Psmc3,Psmc5,Psmd4,Psmd2,Psmd3,Psmc4,Psmd13,Psmd8,Psmd14,Psmd6,Psmd12,Psmc6,Psmd11,Psmd1
8_Member	GO Cellular Components	GO:1905368	peptidase complex	-15.3893	-13.4883	31/92	15507,17463,19166,19170,19172,19175,19179,19182,19184,19185,19359,21762,22123,22393,23996,23997,26440,26441,26442,26444,53382,56207,57296,59025,59029,66413,66997,67089,69077,70247,269523	Hspb1,Psmd7,Psma2,Psmb1,Psmb4,Psmb6,Psmc1,Psmc3,Psmc5,Psmd4,Rad23b,Psmd2,Psmd3,Wfs1,Psmc4,Psmd13,Psma1,Psma4,Psma5,Psma7,Txnl1,Uchl5,Psmd8,Usp14,Psmd14,Psmd6,Psmd12,Psmc6,Psmd11,Psmd1,Vcp
8_Member	GO Cellular Components	GO:0005838	proteasome regulatory particle	-14.535	-12.6867	16/23	17463,19179,19182,19184,19185,21762,22123,23996,23997,57296,59029,66413,66997,67089,69077,70247	Psmd7,Psmc1,Psmc3,Psmc5,Psmd4,Psmd2,Psmd3,Psmc4,Psmd13,Psmd8,Psmd14,Psmd6,Psmd12,Psmc6,Psmd11,Psmd1
8_Member	GO Cellular Components	GO:0022624	proteasome accessory complex	-13.6627	-11.8615	16/25	17463,19179,19182,19184,19185,21762,22123,23996,23997,57296,59029,66413,66997,67089,69077,70247	Psmd7,Psmc1,Psmc3,Psmc5,Psmd4,Psmd2,Psmd3,Psmc4,Psmd13,Psmd8,Psmd14,Psmd6,Psmd12,Psmc6,Psmd11,Psmd1
8_Member	GO Cellular Components	GO:0008540	proteasome regulatory particle, base subcomplex	-7.26371	-5.84449	8/12	19179,19182,19184,19185,21762,23996,67089,70247	Psmc1,Psmc3,Psmc5,Psmd4,Psmd2,Psmc4,Psmc6,Psmd1
8_Member	GO Cellular Components	GO:0031597	cytosolic proteasome complex	-7.12075	-5.71067	7/9	19184,21762,23996,56207,59029,67089,70247	Psmc5,Psmd2,Psmc4,Uchl5,Psmd14,Psmc6,Psmd1
8_Member	GO Cellular Components	GO:0008541	proteasome regulatory particle, lid subcomplex	-5.53996	-4.29374	6/9	22123,23997,57296,59029,66997,69077	Psmd3,Psmd13,Psmd8,Psmd14,Psmd12,Psmd11
9_Summary	GO Cellular Components	GO:0099568	cytoplasmic region	-18.74	-16.7456	83/475	11610,11789,11848,11852,12306,12308,12322,12330,12331,12386,12387,12540,13169,13424,13426,13627,13806,13829,14161,14265,14415,14677,15387,15444,16568,17118,17524,17756,17758,17762,17886,17975,18472,18643,18747,18952,19084,19229,19385,19387,19684,20362,20525,21916,26395,26398,26413,26419,26875,54130,54418,56350,56431,57436,60595,63985,64933,67252,67443,67839,68337,73178,76192,76499,76707,76787,775…	Agtrap,Apc,Rhoa,Rhob,Anxa2,Calb2,Camk2a,Canx,Cap1,Ctnna2,Ctnnb1,Cdc42,Dbnl,Dync1h1,Dync1i1,Eef1a1,Eno1,Dmtn,Fga,Fmr1,Gad1,Gnai1,Hnrnpk,Hpca,Kif3a,Marcks,Mpp1,Map2,Map4,Mapt,Myh9,Ncl,Pafah1b1,Pfn1,Prkaca,Sept4,Prkar1a,Ptk2b,Ranbp1,Rangap1,Rdx,Sept8,Slc2a1,Tmod1,Map2k1,Map2k4,Mapk1,Mapk8,Pclo,Actr1a,Fmn2,Arl3,Dstn,Gabarapl1,Actn4,Gmfb,Ap3m2,Cap2,Map1lc3b,Gpsm1,Crip2,Wasl,Abhd12,Clasp2,Clasp1,Ppfia3…
9_Member	GO Cellular Components	GO:0099568	cytoplasmic region	-18.74	-16.7456	83/475	11610,11789,11848,11852,12306,12308,12322,12330,12331,12386,12387,12540,13169,13424,13426,13627,13806,13829,14161,14265,14415,14677,15387,15444,16568,17118,17524,17756,17758,17762,17886,17975,18472,18643,18747,18952,19084,19229,19385,19387,19684,20362,20525,21916,26395,26398,26413,26419,26875,54130,54418,56350,56431,57436,60595,63985,64933,67252,67443,67839,68337,73178,76192,76499,76707,76787,775…	Agtrap,Apc,Rhoa,Rhob,Anxa2,Calb2,Camk2a,Canx,Cap1,Ctnna2,Ctnnb1,Cdc42,Dbnl,Dync1h1,Dync1i1,Eef1a1,Eno1,Dmtn,Fga,Fmr1,Gad1,Gnai1,Hnrnpk,Hpca,Kif3a,Marcks,Mpp1,Map2,Map4,Mapt,Myh9,Ncl,Pafah1b1,Pfn1,Prkaca,Sept4,Prkar1a,Ptk2b,Ranbp1,Rangap1,Rdx,Sept8,Slc2a1,Tmod1,Map2k1,Map2k4,Mapk1,Mapk8,Pclo,Actr1a,Fmn2,Arl3,Dstn,Gabarapl1,Actn4,Gmfb,Ap3m2,Cap2,Map1lc3b,Gpsm1,Crip2,Wasl,Abhd12,Clasp2,Clasp1,Ppfia3…
9_Member	GO Cellular Components	GO:0005938	cell cortex	-15.0538	-13.18	59/312	11610,11789,11848,11852,12306,12308,12331,12386,12387,12540,13169,13424,13627,13806,13829,14161,14415,14677,15387,17118,17524,17886,17975,18472,18643,18952,19229,19684,20362,20525,21916,26395,26875,54130,54418,56431,60595,63985,67252,67839,68337,73178,76499,76707,76787,77579,77767,80297,99571,101706,102058,110135,110380,111173,192176,217124,226977,243725,320365	Agtrap,Apc,Rhoa,Rhob,Anxa2,Calb2,Cap1,Ctnna2,Ctnnb1,Cdc42,Dbnl,Dync1h1,Eef1a1,Eno1,Dmtn,Fga,Gad1,Gnai1,Hnrnpk,Marcks,Mpp1,Myh9,Ncl,Pafah1b1,Pfn1,Sept4,Ptk2b,Rdx,Sept8,Slc2a1,Tmod1,Map2k1,Pclo,Actr1a,Fmn2,Dstn,Actn4,Gmfb,Cap2,Gpsm1,Crip2,Wasl,Clasp2,Clasp1,Ppfia3,Myh10,Ermn,Sptbn4,Fgg,Numa1,Exoc8,Fgb,Shroom2,Erc1,Flna,Ppp1r9b,Actr1b,Ppp1r9a,Fry
9_Member	GO Cellular Components	GO:0044448	cell cortex part	-7.80685	-6.349	35/208	12308,12331,12386,12387,13169,13627,13806,13829,14677,17524,17886,18952,19684,20362,20525,21916,26875,54130,56431,60595,63985,67252,73178,76499,76707,76787,80297,101706,102058,110380,111173,192176,217124,226977,243725	Calb2,Cap1,Ctnna2,Ctnnb1,Dbnl,Eef1a1,Eno1,Dmtn,Gnai1,Mpp1,Myh9,Sept4,Rdx,Sept8,Slc2a1,Tmod1,Pclo,Actr1a,Dstn,Actn4,Gmfb,Cap2,Wasl,Clasp2,Clasp1,Ppfia3,Sptbn4,Numa1,Exoc8,Shroom2,Erc1,Flna,Ppp1r9b,Actr1b,Ppp1r9a
9_Member	GO Cellular Components	GO:0030863	cortical cytoskeleton	-6.24736	-4.92689	24/131	12308,12331,13169,13627,13829,17524,17886,19684,20525,21916,26875,56431,60595,63985,67252,73178,76499,76707,80297,101706,110380,192176,217124,243725	Calb2,Cap1,Dbnl,Eef1a1,Dmtn,Mpp1,Myh9,Rdx,Slc2a1,Tmod1,Pclo,Dstn,Actn4,Gmfb,Cap2,Wasl,Clasp2,Clasp1,Sptbn4,Numa1,Shroom2,Flna,Ppp1r9b,Ppp1r9a
9_Member	GO Cellular Components	GO:0030864	cortical actin cytoskeleton	-3.20083	-2.20294	15/99	12308,12331,13169,13627,17886,19684,20525,56431,63985,67252,73178,80297,110380,217124,243725	Calb2,Cap1,Dbnl,Eef1a1,Myh9,Rdx,Slc2a1,Dstn,Gmfb,Cap2,Wasl,Sptbn4,Shroom2,Ppp1r9b,Ppp1r9a
10_Summary	GO Cellular Components	GO:0031252	cell leading edge	-16.5472	-14.6172	69/380	11308,11785,11789,11820,11840,11843,11848,11966,12306,12385,12386,12387,12539,12540,12568,12704,13169,13627,13800,13823,14394,14395,14396,14457,14683,14810,15444,15519,16202,17756,17762,17886,17918,17920,18472,18479,18483,19229,19230,19684,20614,21894,22631,23789,23969,50997,52822,54126,54393,56013,57436,70549,72993,73178,76499,77579,83767,100169,101314,102058,192197,216831,217124,226251,234353,2…	Abi1,Apbb1,Apc,App,Arf1,Arf4,Rhoa,Atp6v1b2,Anxa2,Ctnna1,Ctnna2,Ctnnb1,Cdc37,Cdc42,Cdk5,Cit,Dbnl,Eef1a1,Enah,Epb41l3,Gabra1,Gabra2,Gabra3,Gas7,Gnas,Grin1,Hpca,Hsp90aa1,Ilk,Map2,Mapt,Myh9,Myo5a,Myo6,Pafah1b1,Pak1,Palm,Ptk2b,Twf1,Rdx,Snap25,Tln1,Ywhaz,Coro1b,Pacsin1,Mpp2,Rufy3,Arhgef7,Gabbr1,Srcin1,Gabarapl1,Tln2,Appl1,Wasl,Clasp2,Myh10,Wasf1,Phactr4,Brk1,Exoc8,Bcas3,Arhgap44,Ppp1r9b,Ablim1,Psd3,Ppp…
10_Member	GO Cellular Components	GO:0031252	cell leading edge	-16.5472	-14.6172	69/380	11308,11785,11789,11820,11840,11843,11848,11966,12306,12385,12386,12387,12539,12540,12568,12704,13169,13627,13800,13823,14394,14395,14396,14457,14683,14810,15444,15519,16202,17756,17762,17886,17918,17920,18472,18479,18483,19229,19230,19684,20614,21894,22631,23789,23969,50997,52822,54126,54393,56013,57436,70549,72993,73178,76499,77579,83767,100169,101314,102058,192197,216831,217124,226251,234353,2…	Abi1,Apbb1,Apc,App,Arf1,Arf4,Rhoa,Atp6v1b2,Anxa2,Ctnna1,Ctnna2,Ctnnb1,Cdc37,Cdc42,Cdk5,Cit,Dbnl,Eef1a1,Enah,Epb41l3,Gabra1,Gabra2,Gabra3,Gas7,Gnas,Grin1,Hpca,Hsp90aa1,Ilk,Map2,Mapt,Myh9,Myo5a,Myo6,Pafah1b1,Pak1,Palm,Ptk2b,Twf1,Rdx,Snap25,Tln1,Ywhaz,Coro1b,Pacsin1,Mpp2,Rufy3,Arhgef7,Gabbr1,Srcin1,Gabarapl1,Tln2,Appl1,Wasl,Clasp2,Myh10,Wasf1,Phactr4,Brk1,Exoc8,Bcas3,Arhgap44,Ppp1r9b,Ablim1,Psd3,Ppp…
10_Member	GO Cellular Components	GO:0098858	actin-based cell projection	-9.983	-8.33102	39/209	11308,11785,11820,11964,11966,11973,12308,12387,12408,12568,13039,13424,13800,13838,14265,16513,17698,17756,17918,17920,17999,18472,18483,19230,19684,20614,26569,29876,52822,54418,56013,56018,57776,73340,77767,102866,217124,242274,243725	Abi1,Apbb1,App,Atp6v1a,Atp6v1b2,Atp6v1e1,Calb2,Ctnnb1,Cbr1,Cdk5,Ctsl,Dync1h1,Enah,Epha4,Fmr1,Kcnj10,Msn,Map2,Myo5a,Myo6,Nedd4,Pafah1b1,Palm,Twf1,Rdx,Snap25,Slc27a4,Clic4,Rufy3,Fmn2,Srcin1,Stard10,Ttyh1,Nptxr,Ermn,Pls3,Ppp1r9b,Lrrc7,Ppp1r9a
10_Member	GO Cellular Components	GO:0030175	filopodium	-8.77197	-7.21847	23/91	11308,11785,11820,12568,13424,13800,13838,14265,17698,17756,17918,18483,19230,19684,20614,52822,56013,57776,73340,77767,217124,242274,243725	Abi1,Apbb1,App,Cdk5,Dync1h1,Enah,Epha4,Fmr1,Msn,Map2,Myo5a,Palm,Twf1,Rdx,Snap25,Rufy3,Srcin1,Ttyh1,Nptxr,Ermn,Ppp1r9b,Lrrc7,Ppp1r9a
10_Member	GO Cellular Components	GO:0030027	lamellipodium	-6.45625	-5.12836	28/165	11308,11785,11789,11820,11848,12385,12386,12387,12568,13169,13800,16202,18479,19229,19684,20614,23789,52822,54126,56013,73178,77579,83767,100169,101314,217124,226251,243725	Abi1,Apbb1,Apc,App,Rhoa,Ctnna1,Ctnna2,Ctnnb1,Cdk5,Dbnl,Enah,Ilk,Pak1,Ptk2b,Rdx,Snap25,Coro1b,Rufy3,Arhgef7,Srcin1,Wasl,Myh10,Wasf1,Phactr4,Brk1,Ppp1r9b,Ablim1,Ppp1r9a
11_Summary	GO Cellular Components	GO:0098685	Schaffer collateral - CA1 synapse	-15.1127	-13.2255	34/113	11784,11785,12322,12387,12540,12552,12568,12889,13001,13838,13854,14265,14360,16438,16728,17918,17920,18189,18643,19055,19058,19085,19878,50997,54393,54725,56637,83397,104015,104027,108100,109934,110279,320127	Apba2,Apbb1,Camk2a,Ctnnb1,Cdc42,Cdh11,Cdk5,Cplx1,Csnk2b,Epha4,Epn1,Fmr1,Fyn,Itpr1,L1cam,Myo5a,Myo6,Nrxn1,Pfn1,Ppp3ca,Ppp3r1,Prkar1b,Rock2,Mpp2,Gabbr1,Cadm1,Gsk3b,Akap12,Synj1,Synpo,Baiap2,Abr,Bcr,Dgki
11_Member	GO Cellular Components	GO:0098685	Schaffer collateral - CA1 synapse	-15.1127	-13.2255	34/113	11784,11785,12322,12387,12540,12552,12568,12889,13001,13838,13854,14265,14360,16438,16728,17918,17920,18189,18643,19055,19058,19085,19878,50997,54393,54725,56637,83397,104015,104027,108100,109934,110279,320127	Apba2,Apbb1,Camk2a,Ctnnb1,Cdc42,Cdh11,Cdk5,Cplx1,Csnk2b,Epha4,Epn1,Fmr1,Fyn,Itpr1,L1cam,Myo5a,Myo6,Nrxn1,Pfn1,Ppp3ca,Ppp3r1,Prkar1b,Rock2,Mpp2,Gabbr1,Cadm1,Gsk3b,Akap12,Synj1,Synpo,Baiap2,Abr,Bcr,Dgki
12_Summary	GO Cellular Components	GO:0097060	synaptic membrane	-14.4174	-12.5813	78/507	11308,11735,11785,11840,12293,12308,12322,12330,12386,12387,12568,12846,12876,12955,13169,13429,13806,13838,13854,14265,14394,14395,14396,14810,14811,14812,15481,15507,16438,16728,18189,18190,18212,18483,18752,19894,20541,20614,20981,23969,24012,29873,50932,50997,53310,54393,54525,54725,56013,64009,66082,66259,67979,68585,69017,74006,83945,84095,94332,103967,104015,104027,108100,109689,110279,217…	Abi1,Ank3,Apbb1,Arf1,Cacna2d1,Calb2,Camk2a,Canx,Ctnna2,Ctnnb1,Cdk5,Comt,Cpe,Cryab,Dbnl,Dnm1,Eno1,Epha4,Epn1,Fmr1,Gabra1,Gabra2,Gabra3,Grin1,Grin2a,Grin2b,Hspa8,Hspb1,Itpr1,L1cam,Nrxn1,Nrxn2,Ntrk2,Palm,Prkcg,Rph3a,Slc8a1,Snap25,Syt3,Pacsin1,Rgs7,Cspg5,Mink1,Mpp2,Dlg3,Gabbr1,Syt7,Cadm1,Srcin1,Syne1,Abhd6,Camk2n1,Atad1,Rtn4,Prrt2,Dnm1l,Dnaja3,Pi4k2a,Cadm3,Dnm3,Synj1,Synpo,Baiap2,Arrb1,Bcr,Ppp1r9b,Fa…
12_Member	GO Cellular Components	GO:0097060	synaptic membrane	-14.4174	-12.5813	78/507	11308,11735,11785,11840,12293,12308,12322,12330,12386,12387,12568,12846,12876,12955,13169,13429,13806,13838,13854,14265,14394,14395,14396,14810,14811,14812,15481,15507,16438,16728,18189,18190,18212,18483,18752,19894,20541,20614,20981,23969,24012,29873,50932,50997,53310,54393,54525,54725,56013,64009,66082,66259,67979,68585,69017,74006,83945,84095,94332,103967,104015,104027,108100,109689,110279,217…	Abi1,Ank3,Apbb1,Arf1,Cacna2d1,Calb2,Camk2a,Canx,Ctnna2,Ctnnb1,Cdk5,Comt,Cpe,Cryab,Dbnl,Dnm1,Eno1,Epha4,Epn1,Fmr1,Gabra1,Gabra2,Gabra3,Grin1,Grin2a,Grin2b,Hspa8,Hspb1,Itpr1,L1cam,Nrxn1,Nrxn2,Ntrk2,Palm,Prkcg,Rph3a,Slc8a1,Snap25,Syt3,Pacsin1,Rgs7,Cspg5,Mink1,Mpp2,Dlg3,Gabbr1,Syt7,Cadm1,Srcin1,Syne1,Abhd6,Camk2n1,Atad1,Rtn4,Prrt2,Dnm1l,Dnaja3,Pi4k2a,Cadm3,Dnm3,Synj1,Synpo,Baiap2,Arrb1,Bcr,Ppp1r9b,Fa…
12_Member	GO Cellular Components	GO:0045211	postsynaptic membrane	-11.1951	-9.50176	58/370	11308,11735,11785,11840,12293,12322,12330,12386,12387,12568,12846,13169,13429,13838,13854,14265,14394,14395,14396,14810,14811,14812,15481,15507,18212,19894,20541,23969,24012,29873,50932,50997,53310,54393,54725,56013,64009,66082,66259,67979,68585,69017,83945,103967,104027,109689,110279,223254,224997,229791,234353,242274,242425,245684,268980,272381,319504,320127	Abi1,Ank3,Apbb1,Arf1,Cacna2d1,Camk2a,Canx,Ctnna2,Ctnnb1,Cdk5,Comt,Dbnl,Dnm1,Epha4,Epn1,Fmr1,Gabra1,Gabra2,Gabra3,Grin1,Grin2a,Grin2b,Hspa8,Hspb1,Ntrk2,Rph3a,Slc8a1,Pacsin1,Rgs7,Cspg5,Mink1,Mpp2,Dlg3,Gabbr1,Cadm1,Srcin1,Syne1,Abhd6,Camk2n1,Atad1,Rtn4,Prrt2,Dnaja3,Dnm3,Synpo,Arrb1,Bcr,Farp1,Dlgap1,Plppr4,Psd3,Lrrc7,Gabbr2,Cnksr2,Strn,Lrrc4b,Nrcam,Dgki
12_Member	GO Cellular Components	GO:0042734	presynaptic membrane	-3.61005	-2.56989	25/198	11785,12293,12330,12386,12387,13429,13838,13854,14810,14811,14812,16728,18189,18190,20614,54393,54525,54725,69017,74006,84095,94332,241727,242425,320127	Apbb1,Cacna2d1,Canx,Ctnna2,Ctnnb1,Dnm1,Epha4,Epn1,Grin1,Grin2a,Grin2b,L1cam,Nrxn1,Nrxn2,Snap25,Gabbr1,Syt7,Cadm1,Prrt2,Dnm1l,Pi4k2a,Cadm3,Snph,Gabbr2,Dgki
12_Member	GO Cellular Components	GO:0099634	postsynaptic specialization membrane	-3.07673	-2.09936	18/134	14394,14395,14396,14810,14811,14812,15481,15507,23969,50997,53310,68585,229791,242274,245684,272381,319504,320127	Gabra1,Gabra2,Gabra3,Grin1,Grin2a,Grin2b,Hspa8,Hspb1,Pacsin1,Mpp2,Dlg3,Rtn4,Plppr4,Lrrc7,Cnksr2,Lrrc4b,Nrcam,Dgki
12_Member	GO Cellular Components	GO:0098839	postsynaptic density membrane	-2.90497	-1.94879	14/95	14810,14811,14812,15507,23969,50997,53310,68585,229791,242274,245684,272381,319504,320127	Grin1,Grin2a,Grin2b,Hspb1,Pacsin1,Mpp2,Dlg3,Rtn4,Plppr4,Lrrc7,Cnksr2,Lrrc4b,Nrcam,Dgki
12_Member	GO Cellular Components	GO:0098936	intrinsic component of postsynaptic membrane	-2.75149	-1.80785	21/178	12293,12330,13838,14394,14395,14396,14810,14811,14812,20541,29873,50997,54393,54725,66082,68585,229791,242274,242425,272381,319504	Cacna2d1,Canx,Epha4,Gabra1,Gabra2,Gabra3,Grin1,Grin2a,Grin2b,Slc8a1,Cspg5,Mpp2,Gabbr1,Cadm1,Abhd6,Rtn4,Plppr4,Lrrc7,Gabbr2,Lrrc4b,Nrcam
12_Member	GO Cellular Components	GO:0099240	intrinsic component of synaptic membrane	-2.62243	-1.70721	26/244	12293,12330,13838,14394,14395,14396,14810,14811,14812,18189,20541,20614,20981,29873,50997,54393,54725,66082,68585,69017,94332,229791,242274,242425,272381,319504	Cacna2d1,Canx,Epha4,Gabra1,Gabra2,Gabra3,Grin1,Grin2a,Grin2b,Nrxn1,Slc8a1,Snap25,Syt3,Cspg5,Mpp2,Gabbr1,Cadm1,Abhd6,Rtn4,Prrt2,Cadm3,Plppr4,Lrrc7,Gabbr2,Lrrc4b,Nrcam
12_Member	GO Cellular Components	GO:0099055	integral component of postsynaptic membrane	-2.3121	-1.43297	19/169	12330,13838,14394,14395,14396,14810,14811,14812,20541,29873,54393,54725,66082,68585,229791,242274,242425,272381,319504	Canx,Epha4,Gabra1,Gabra2,Gabra3,Grin1,Grin2a,Grin2b,Slc8a1,Cspg5,Gabbr1,Cadm1,Abhd6,Rtn4,Plppr4,Lrrc7,Gabbr2,Lrrc4b,Nrcam
12_Member	GO Cellular Components	GO:0099699	integral component of synaptic membrane	-2.14557	-1.29605	23/226	12330,13838,14394,14395,14396,14810,14811,14812,18189,20541,20981,29873,54393,54725,66082,68585,69017,94332,229791,242274,242425,272381,319504	Canx,Epha4,Gabra1,Gabra2,Gabra3,Grin1,Grin2a,Grin2b,Nrxn1,Slc8a1,Syt3,Cspg5,Gabbr1,Cadm1,Abhd6,Rtn4,Prrt2,Cadm3,Plppr4,Lrrc7,Gabbr2,Lrrc4b,Nrcam
13_Summary	GO Cellular Components	GO:0099503	secretory vesicle	-14.1042	-12.2801	85/587	11750,11773,11784,11820,12215,12313,12385,12466,12540,12652,12653,12876,13039,13429,14161,14395,14417,14810,14811,14812,14827,15212,15481,16438,16560,16784,16971,17698,17918,18125,18484,18619,18747,18952,19063,19326,19339,19342,19344,19346,19349,19894,20254,20255,20394,20614,20720,20981,21454,22317,22365,22393,52551,53612,54393,54525,54725,66237,66290,67295,67808,67826,68365,68581,69017,74006,767…	Anxa7,Ap2m1,Apba2,App,Bsg,Calm1,Ctnna1,Cct6a,Cdc42,Chga,Chgb,Cpe,Ctsl,Dnm1,Fga,Gabra2,Gad2,Grin1,Grin2a,Grin2b,Pdia3,Hexb,Hspa8,Itpr1,Kif1a,Lamp2,Lrp1,Msn,Myo5a,Nos1,Pam,Penk,Prkaca,Sept4,Ppt1,Rab11b,Rab3a,Rab4b,Rab5b,Rab6a,Rab7,Rph3a,Scg2,Scg3,Scg5,Snap25,Serpine2,Syt3,Tcp1,Vamp1,Vps45,Wfs1,Sgta,Vti1b,Gabbr1,Syt7,Cadm1,Atp6v1g2,Atp6v1g1,Rab3c,Tprgl,Snap47,Rab14,Tmed10,Prrt2,Dnm1l,Ppfia3,Usp8,Pi4…
13_Member	GO Cellular Components	GO:0099503	secretory vesicle	-14.1042	-12.2801	85/587	11750,11773,11784,11820,12215,12313,12385,12466,12540,12652,12653,12876,13039,13429,14161,14395,14417,14810,14811,14812,14827,15212,15481,16438,16560,16784,16971,17698,17918,18125,18484,18619,18747,18952,19063,19326,19339,19342,19344,19346,19349,19894,20254,20255,20394,20614,20720,20981,21454,22317,22365,22393,52551,53612,54393,54525,54725,66237,66290,67295,67808,67826,68365,68581,69017,74006,767…	Anxa7,Ap2m1,Apba2,App,Bsg,Calm1,Ctnna1,Cct6a,Cdc42,Chga,Chgb,Cpe,Ctsl,Dnm1,Fga,Gabra2,Gad2,Grin1,Grin2a,Grin2b,Pdia3,Hexb,Hspa8,Itpr1,Kif1a,Lamp2,Lrp1,Msn,Myo5a,Nos1,Pam,Penk,Prkaca,Sept4,Ppt1,Rab11b,Rab3a,Rab4b,Rab5b,Rab6a,Rab7,Rph3a,Scg2,Scg3,Scg5,Snap25,Serpine2,Syt3,Tcp1,Vamp1,Vps45,Wfs1,Sgta,Vti1b,Gabbr1,Syt7,Cadm1,Atp6v1g2,Atp6v1g1,Rab3c,Tprgl,Snap47,Rab14,Tmed10,Prrt2,Dnm1l,Ppfia3,Usp8,Pi4…
13_Member	GO Cellular Components	GO:0030141	secretory granule	-5.84395	-4.57218	47/384	11750,11773,12215,12385,12466,12540,12652,12653,12876,13039,14161,14827,15212,16438,16784,16971,17698,17918,18125,18484,18619,18747,19339,19342,19349,19894,20254,20255,20394,20720,21454,22317,68365,68581,76787,84092,99571,107767,108100,108155,110135,207227,269713,271457,353172,380773,381677	Anxa7,Ap2m1,Bsg,Ctnna1,Cct6a,Cdc42,Chga,Chgb,Cpe,Ctsl,Fga,Pdia3,Hexb,Itpr1,Lamp2,Lrp1,Msn,Myo5a,Nos1,Pam,Penk,Prkaca,Rab3a,Rab4b,Rab7,Rph3a,Scg2,Scg3,Scg5,Serpine2,Tcp1,Vamp1,Rab14,Tmed10,Ppfia3,Usp8,Fgg,Scamp1,Baiap2,Ogt,Fgb,Stxbp5l,Clip2,Rab5a,Gars,Slirp,Vgf
13_Member	GO Cellular Components	GO:0030667	secretory granule membrane	-2.93596	-1.97564	13/84	11750,12215,12876,16438,16784,17698,18484,20255,22317,68581,107767,271457,381677	Anxa7,Bsg,Cpe,Itpr1,Lamp2,Msn,Pam,Scg3,Vamp1,Tmed10,Scamp1,Rab5a,Vgf
14_Summary	GO Cellular Components	GO:0101031	chaperone complex	-13.9279	-12.1153	15/21	12461,12462,12464,12465,12466,12468,12469,12539,15481,15516,19060,21454,29810,56351,56424	Cct2,Cct3,Cct4,Cct5,Cct6a,Cct7,Cct8,Cdc37,Hspa8,Hsp90ab1,Ppp5c,Tcp1,Bag3,Ptges3,Stub1
14_Member	GO Cellular Components	GO:0101031	chaperone complex	-13.9279	-12.1153	15/21	12461,12462,12464,12465,12466,12468,12469,12539,15481,15516,19060,21454,29810,56351,56424	Cct2,Cct3,Cct4,Cct5,Cct6a,Cct7,Cct8,Cdc37,Hspa8,Hsp90ab1,Ppp5c,Tcp1,Bag3,Ptges3,Stub1
14_Member	CORUM	CORUM:132	CCT complex (chaperonin containing TCP1 complex)	-8.63161	-7.11432	7/7	12461,12462,12464,12465,12468,12469,21454	Cct2,Cct3,Cct4,Cct5,Cct7,Cct8,Tcp1
14_Member	CORUM	CORUM:51	CCT complex (chaperonin containing TCP1 complex)	-8.63161	-7.11432	7/7	12461,12462,12464,12465,12468,12469,21454	Cct2,Cct3,Cct4,Cct5,Cct7,Cct8,Tcp1
14_Member	CORUM	CORUM:52	CCT complex (chaperonin containing TCP1 complex)	-8.63161	-7.11432	7/7	12461,12462,12464,12465,12468,12469,21454	Cct2,Cct3,Cct4,Cct5,Cct7,Cct8,Tcp1
14_Member	GO Cellular Components	GO:0005832	chaperonin-containing T-complex	-8.25901	-6.75876	8/10	12461,12462,12464,12465,12466,12468,12469,21454	Cct2,Cct3,Cct4,Cct5,Cct6a,Cct7,Cct8,Tcp1
14_Member	CORUM	CORUM:3072	CCT complex (chaperonin containing TCP1 complex), testis specific	-7.75125	-6.31794	7/8	12461,12462,12464,12465,12468,12469,21454	Cct2,Cct3,Cct4,Cct5,Cct7,Cct8,Tcp1
14_Member	GO Cellular Components	GO:0002199	zona pellucida receptor complex	-6.87176	-5.51284	8/13	12461,12462,12464,12465,12466,12468,12469,21454	Cct2,Cct3,Cct4,Cct5,Cct6a,Cct7,Cct8,Tcp1
15_Summary	GO Cellular Components	GO:0035770	ribonucleoprotein granule	-12.433	-10.6639	43/209	13205,13209,13211,13426,13665,13682,13684,14265,15387,15388,16211,16549,17762,17975,18412,18458,18739,19166,19182,19878,20239,21969,22218,22608,23879,23881,23983,26441,27041,50783,51810,53872,56541,56758,64009,73158,73826,104721,213541,231413,233871,269523,270086	Ddx3x,Ddx6,Dhx9,Dync1i1,Eif2s1,Eif4a2,Eif4e,Fmr1,Hnrnpk,Hnrnpl,Kpnb1,Khsrp,Mapt,Ncl,Sqstm1,Pabpc1,Pitpnm1,Psma2,Psmc3,Rock2,Atxn2,Top1,Sumo1,Ybx1,Fxr2,G3bp2,Pcbp1,Psma4,G3bp1,Lsm4,Hnrnpu,Caprin1,Habp4,Mbnl1,Syne1,Larp1,Poldip3,Ddx1,Ythdf2,Grsf1,Atxn2l,Vcp,Ogfod1
15_Member	GO Cellular Components	GO:0035770	ribonucleoprotein granule	-12.433	-10.6639	43/209	13205,13209,13211,13426,13665,13682,13684,14265,15387,15388,16211,16549,17762,17975,18412,18458,18739,19166,19182,19878,20239,21969,22218,22608,23879,23881,23983,26441,27041,50783,51810,53872,56541,56758,64009,73158,73826,104721,213541,231413,233871,269523,270086	Ddx3x,Ddx6,Dhx9,Dync1i1,Eif2s1,Eif4a2,Eif4e,Fmr1,Hnrnpk,Hnrnpl,Kpnb1,Khsrp,Mapt,Ncl,Sqstm1,Pabpc1,Pitpnm1,Psma2,Psmc3,Rock2,Atxn2,Top1,Sumo1,Ybx1,Fxr2,G3bp2,Pcbp1,Psma4,G3bp1,Lsm4,Hnrnpu,Caprin1,Habp4,Mbnl1,Syne1,Larp1,Poldip3,Ddx1,Ythdf2,Grsf1,Atxn2l,Vcp,Ogfod1
15_Member	GO Cellular Components	GO:0036464	cytoplasmic ribonucleoprotein granule	-11.3463	-9.63518	40/198	13205,13209,13211,13426,13665,13682,13684,14265,15387,16211,16549,17762,17975,18412,18458,18739,19166,19182,19878,20239,21969,22608,23879,23881,23983,26441,27041,50783,51810,53872,56541,56758,64009,73158,73826,104721,213541,233871,269523,270086	Ddx3x,Ddx6,Dhx9,Dync1i1,Eif2s1,Eif4a2,Eif4e,Fmr1,Hnrnpk,Kpnb1,Khsrp,Mapt,Ncl,Sqstm1,Pabpc1,Pitpnm1,Psma2,Psmc3,Rock2,Atxn2,Top1,Ybx1,Fxr2,G3bp2,Pcbp1,Psma4,G3bp1,Lsm4,Hnrnpu,Caprin1,Habp4,Mbnl1,Syne1,Larp1,Poldip3,Ddx1,Ythdf2,Atxn2l,Vcp,Ogfod1
15_Member	GO Cellular Components	GO:0010494	cytoplasmic stress granule	-11.312	-9.6098	22/64	13205,13209,13665,13682,13684,14265,15387,16211,16549,18458,20239,22608,23881,27041,53872,56541,56758,73158,104721,233871,269523,270086	Ddx3x,Ddx6,Eif2s1,Eif4a2,Eif4e,Fmr1,Hnrnpk,Kpnb1,Khsrp,Pabpc1,Atxn2,Ybx1,G3bp2,G3bp1,Caprin1,Habp4,Mbnl1,Larp1,Ddx1,Atxn2l,Vcp,Ogfod1
15_Member	GO Cellular Components	GO:0000932	P-body	-2.57137	-1.65759	11/71	13209,13684,18412,19166,19182,21969,26441,50783,53872,64009,213541	Ddx6,Eif4e,Sqstm1,Psma2,Psmc3,Top1,Psma4,Lsm4,Caprin1,Syne1,Ythdf2
16_Summary	GO Cellular Components	GO:0005773	vacuole	-12.1527	-10.4038	75/526	11305,11735,11816,11881,11886,11964,12306,12334,12359,12492,12540,12704,13010,13030,13033,13039,14319,14387,14609,14667,14824,15212,15481,15516,16563,16784,17748,17918,17939,17957,18125,18412,19063,19156,19339,19349,20661,22201,30930,53612,54126,54525,56382,56440,57436,65114,66082,66237,66290,66335,66439,66508,66530,66734,66881,67166,67443,67474,67561,67963,68365,68576,71732,71772,72145,80743,937…	Abca2,Ank3,Apoe,Arsb,Asah1,Atp6v1a,Anxa2,Capn2,Cat,Scarb2,Cdc42,Cit,Cst3,Ctsb,Ctsd,Ctsl,Fth1,Gaa,Gja1,Gm2a,Grn,Hexb,Hspa8,Hsp90ab1,Kif2a,Lamp2,Mt1,Myo5a,Naga,Napb,Nos1,Sqstm1,Ppt1,Psap,Rab3a,Rab7,Sort1,Uba1,Vps26a,Vti1b,Arhgef7,Syt7,Rab9,Snx1,Gabarapl1,Vps35,Abhd6,Atp6v1g2,Atp6v1g1,Atp6v1c1,Borcs7,Lamtor1,Ubxn6,Map1lc3a,Pcyox1,Arl8b,Map1lc3b,Snap29,Wdr48,Npc2,Rab14,Lamtor5,Vps11,Plbd2,Wdfy3,Vps16…
16_Member	GO Cellular Components	GO:0005773	vacuole	-12.1527	-10.4038	75/526	11305,11735,11816,11881,11886,11964,12306,12334,12359,12492,12540,12704,13010,13030,13033,13039,14319,14387,14609,14667,14824,15212,15481,15516,16563,16784,17748,17918,17939,17957,18125,18412,19063,19156,19339,19349,20661,22201,30930,53612,54126,54525,56382,56440,57436,65114,66082,66237,66290,66335,66439,66508,66530,66734,66881,67166,67443,67474,67561,67963,68365,68576,71732,71772,72145,80743,937…	Abca2,Ank3,Apoe,Arsb,Asah1,Atp6v1a,Anxa2,Capn2,Cat,Scarb2,Cdc42,Cit,Cst3,Ctsb,Ctsd,Ctsl,Fth1,Gaa,Gja1,Gm2a,Grn,Hexb,Hspa8,Hsp90ab1,Kif2a,Lamp2,Mt1,Myo5a,Naga,Napb,Nos1,Sqstm1,Ppt1,Psap,Rab3a,Rab7,Sort1,Uba1,Vps26a,Vti1b,Arhgef7,Syt7,Rab9,Snx1,Gabarapl1,Vps35,Abhd6,Atp6v1g2,Atp6v1g1,Atp6v1c1,Borcs7,Lamtor1,Ubxn6,Map1lc3a,Pcyox1,Arl8b,Map1lc3b,Snap29,Wdr48,Npc2,Rab14,Lamtor5,Vps11,Plbd2,Wdfy3,Vps16…
16_Member	GO Cellular Components	GO:0005764	lysosome	-9.41209	-7.7906	60/431	11305,11735,11816,11881,11886,12306,12334,12359,12492,13010,13030,13033,13039,14319,14387,14609,14667,14824,15212,15481,15516,16563,16784,17748,17918,17939,18125,18412,19063,19156,19339,19349,20661,22201,30930,53612,54525,56382,56440,65114,66082,66290,66439,66508,66530,66734,66881,67166,67443,67561,67963,68365,68576,71732,71772,80743,105298,234663,235661,330260	Abca2,Ank3,Apoe,Arsb,Asah1,Anxa2,Capn2,Cat,Scarb2,Cst3,Ctsb,Ctsd,Ctsl,Fth1,Gaa,Gja1,Gm2a,Grn,Hexb,Hspa8,Hsp90ab1,Kif2a,Lamp2,Mt1,Myo5a,Naga,Nos1,Sqstm1,Ppt1,Psap,Rab3a,Rab7,Sort1,Uba1,Vps26a,Vti1b,Syt7,Rab9,Snx1,Vps35,Abhd6,Atp6v1g1,Borcs7,Lamtor1,Ubxn6,Map1lc3a,Pcyox1,Arl8b,Map1lc3b,Wdr48,Npc2,Rab14,Lamtor5,Vps11,Plbd2,Vps16,Epdr1,Dync1li2,Dync1li1,Pon2
16_Member	GO Cellular Components	GO:0000323	lytic vacuole	-9.37191	-7.76489	60/432	11305,11735,11816,11881,11886,12306,12334,12359,12492,13010,13030,13033,13039,14319,14387,14609,14667,14824,15212,15481,15516,16563,16784,17748,17918,17939,18125,18412,19063,19156,19339,19349,20661,22201,30930,53612,54525,56382,56440,65114,66082,66290,66439,66508,66530,66734,66881,67166,67443,67561,67963,68365,68576,71732,71772,80743,105298,234663,235661,330260	Abca2,Ank3,Apoe,Arsb,Asah1,Anxa2,Capn2,Cat,Scarb2,Cst3,Ctsb,Ctsd,Ctsl,Fth1,Gaa,Gja1,Gm2a,Grn,Hexb,Hspa8,Hsp90ab1,Kif2a,Lamp2,Mt1,Myo5a,Naga,Nos1,Sqstm1,Ppt1,Psap,Rab3a,Rab7,Sort1,Uba1,Vps26a,Vti1b,Syt7,Rab9,Snx1,Vps35,Abhd6,Atp6v1g1,Borcs7,Lamtor1,Ubxn6,Map1lc3a,Pcyox1,Arl8b,Map1lc3b,Wdr48,Npc2,Rab14,Lamtor5,Vps11,Plbd2,Vps16,Epdr1,Dync1li2,Dync1li1,Pon2
16_Member	GO Cellular Components	GO:0005770	late endosome	-8.82088	-7.25461	36/200	11816,11840,11852,12306,13010,14609,14824,15481,16784,17918,19156,19349,22041,22070,22088,26395,26413,26417,53612,56382,65114,66082,66508,66530,66734,68365,68576,69091,71732,76089,77480,80743,102058,234663,235661,245860	Apoe,Arf1,Rhob,Anxa2,Cst3,Gja1,Grn,Hspa8,Lamp2,Myo5a,Psap,Rab7,Trf,Tpt1,Tsg101,Map2k1,Mapk1,Mapk3,Vti1b,Rab9,Vps35,Abhd6,Lamtor1,Ubxn6,Map1lc3a,Rab14,Lamtor5,Vps26b,Vps11,Rapgef2,Kidins220,Vps16,Exoc8,Dync1li2,Dync1li1,Atg9a
16_Member	GO Cellular Components	GO:0005774	vacuolar membrane	-5.77262	-4.51381	27/168	11305,11964,12306,12492,13033,14824,15481,15516,16784,17957,19349,22201,53612,57436,66082,66237,66290,66335,66530,66734,67166,67443,72145,93739,108123,108124,245860	Abca2,Atp6v1a,Anxa2,Scarb2,Ctsd,Grn,Hspa8,Hsp90ab1,Lamp2,Napb,Rab7,Uba1,Vti1b,Gabarapl1,Abhd6,Atp6v1g2,Atp6v1g1,Atp6v1c1,Ubxn6,Map1lc3a,Arl8b,Map1lc3b,Wdfy3,Gabarapl2,Napg,Napa,Atg9a
16_Member	GO Cellular Components	GO:0044437	vacuolar part	-5.28278	-4.06069	27/178	11305,11964,12306,12492,13033,14824,15481,15516,16784,17957,19349,22201,53612,57436,66082,66237,66290,66335,66530,66734,67166,67443,72145,93739,108123,108124,245860	Abca2,Atp6v1a,Anxa2,Scarb2,Ctsd,Grn,Hspa8,Hsp90ab1,Lamp2,Napb,Rab7,Uba1,Vti1b,Gabarapl1,Abhd6,Atp6v1g2,Atp6v1g1,Atp6v1c1,Ubxn6,Map1lc3a,Arl8b,Map1lc3b,Wdfy3,Gabarapl2,Napg,Napa,Atg9a
16_Member	GO Cellular Components	GO:0005765	lysosomal membrane	-2.76407	-1.81733	15/109	11305,12306,12492,13033,14824,15481,15516,16784,19349,22201,53612,66082,66290,66530,67166	Abca2,Anxa2,Scarb2,Ctsd,Grn,Hspa8,Hsp90ab1,Lamp2,Rab7,Uba1,Vti1b,Abhd6,Atp6v1g1,Ubxn6,Arl8b
16_Member	GO Cellular Components	GO:0098852	lytic vacuole membrane	-2.72402	-1.79855	15/110	11305,12306,12492,13033,14824,15481,15516,16784,19349,22201,53612,66082,66290,66530,67166	Abca2,Anxa2,Scarb2,Ctsd,Grn,Hspa8,Hsp90ab1,Lamp2,Rab7,Uba1,Vti1b,Abhd6,Atp6v1g1,Ubxn6,Arl8b
17_Summary	GO Cellular Components	GO:0044445	cytosolic part	-11.849	-10.1194	52/299	11676,12322,12461,12462,12464,12465,12466,12468,12469,13205,13684,13806,14109,14265,15384,15481,16785,17999,18642,18751,18752,18754,19184,19941,20614,21454,21762,23996,27367,27370,27643,52551,56040,56207,56421,59029,65019,66439,67025,67089,67186,67826,68193,70247,72199,78294,84095,108100,110954,111173,192170,229317	Aldoc,Camk2a,Cct2,Cct3,Cct4,Cct5,Cct6a,Cct7,Cct8,Ddx3x,Eif4e,Eno1,Fau,Fmr1,Hnrnpab,Hspa8,Rpsa,Nedd4,Pfkm,Prkcb,Prkcg,Prkce,Psmc5,Rpl26,Snap25,Tcp1,Psmd2,Psmc4,Rpl3,Rps26,Ubl4a,Sgta,Rplp1,Uchl5,Pfkp,Psmd14,Rpl23,Borcs7,Rpl11,Psmc6,Rplp2,Snap47,Rpl24,Psmd1,Mms19,Rps27a,Pi4k2a,Baiap2,Rpl10,Erc1,Eif4a3,Eif2a
17_Member	GO Cellular Components	GO:0044445	cytosolic part	-11.849	-10.1194	52/299	11676,12322,12461,12462,12464,12465,12466,12468,12469,13205,13684,13806,14109,14265,15384,15481,16785,17999,18642,18751,18752,18754,19184,19941,20614,21454,21762,23996,27367,27370,27643,52551,56040,56207,56421,59029,65019,66439,67025,67089,67186,67826,68193,70247,72199,78294,84095,108100,110954,111173,192170,229317	Aldoc,Camk2a,Cct2,Cct3,Cct4,Cct5,Cct6a,Cct7,Cct8,Ddx3x,Eif4e,Eno1,Fau,Fmr1,Hnrnpab,Hspa8,Rpsa,Nedd4,Pfkm,Prkcb,Prkcg,Prkce,Psmc5,Rpl26,Snap25,Tcp1,Psmd2,Psmc4,Rpl3,Rps26,Ubl4a,Sgta,Rplp1,Uchl5,Pfkp,Psmd14,Rpl23,Borcs7,Rpl11,Psmc6,Rplp2,Snap47,Rpl24,Psmd1,Mms19,Rps27a,Pi4k2a,Baiap2,Rpl10,Erc1,Eif4a3,Eif2a
18_Summary	GO Cellular Components	GO:0120111	neuron projection cytoplasm	-11.4856	-9.7654	18/41	12322,12330,13426,14265,15444,16568,17756,19385,19387,26395,26398,26413,26419,57436,64933,76192,108100,382253,17758,17762,18747,19084,56350,67443,99371	Camk2a,Canx,Dync1i1,Fmr1,Hpca,Kif3a,Map2,Ranbp1,Rangap1,Map2k1,Map2k4,Mapk1,Mapk8,Gabarapl1,Ap3m2,Abhd12,Baiap2,Cdkl5,Map4,Mapt,Prkaca,Prkar1a,Arl3,Map1lc3b,Arfgef2
18_Member	GO Cellular Components	GO:0120111	neuron projection cytoplasm	-11.4856	-9.7654	18/41	12322,12330,13426,14265,15444,16568,17756,19385,19387,26395,26398,26413,26419,57436,64933,76192,108100,382253	Camk2a,Canx,Dync1i1,Fmr1,Hpca,Kif3a,Map2,Ranbp1,Rangap1,Map2k1,Map2k4,Mapk1,Mapk8,Gabarapl1,Ap3m2,Abhd12,Baiap2,Cdkl5
18_Member	GO Cellular Components	GO:0032839	dendrite cytoplasm	-7.92524	-6.45197	12/27	12322,12330,15444,17756,26395,26398,26413,26419,57436,76192,108100,382253	Camk2a,Canx,Hpca,Map2,Map2k1,Map2k4,Mapk1,Mapk8,Gabarapl1,Abhd12,Baiap2,Cdkl5
18_Member	GO Cellular Components	GO:0032838	plasma membrane bounded cell projection cytoplasm	-4.65841	-3.49395	25/171	12322,12330,13426,14265,15444,16568,17756,17758,17762,18747,19084,19385,19387,26395,26398,26413,26419,56350,57436,64933,67443,76192,99371,108100,382253	Camk2a,Canx,Dync1i1,Fmr1,Hpca,Kif3a,Map2,Map4,Mapt,Prkaca,Prkar1a,Ranbp1,Rangap1,Map2k1,Map2k4,Mapk1,Mapk8,Arl3,Gabarapl1,Ap3m2,Map1lc3b,Abhd12,Arfgef2,Baiap2,Cdkl5
19_Summary	GO Cellular Components	GO:0030117	membrane coat	-11.0177	-9.34131	27/99	11765,11773,11774,11775,11776,12847,13429,13855,20334,22041,54160,54161,56447,64933,66251,67602,67898,70349,71732,75608,77038,80743,99683,104015,213827,218811,269774,11840,14683,23969,54130,68581,11820,12891,16971,17920,18222,20661,53612,54198,56041,68365,107767,18220,26875,29873,224020	Ap1g1,Ap2m1,Ap3b1,Ap3b2,Ap3d1,Copa,Dnm1,Epn2,Sec23a,Trf,Copg2,Copg1,Copz1,Ap3m2,Arfgap3,Necap1,Pef1,Copb1,Vps11,Chmp4b,Arfgap2,Vps16,Sec24b,Synj1,Arcn1,Sec24c,Aak1,Arf1,Gnas,Pacsin1,Actr1a,Tmed10,App,Cpne6,Lrp1,Myo6,Numb,Sort1,Vti1b,Snx3,Uso1,Rab14,Scamp1,Nucb1,Pclo,Cspg5,Pi4ka
19_Member	GO Cellular Components	GO:0030117	membrane coat	-11.0177	-9.34131	27/99	11765,11773,11774,11775,11776,12847,13429,13855,20334,22041,54160,54161,56447,64933,66251,67602,67898,70349,71732,75608,77038,80743,99683,104015,213827,218811,269774	Ap1g1,Ap2m1,Ap3b1,Ap3b2,Ap3d1,Copa,Dnm1,Epn2,Sec23a,Trf,Copg2,Copg1,Copz1,Ap3m2,Arfgap3,Necap1,Pef1,Copb1,Vps11,Chmp4b,Arfgap2,Vps16,Sec24b,Synj1,Arcn1,Sec24c,Aak1
19_Member	GO Cellular Components	GO:0048475	coated membrane	-11.0177	-9.34131	27/99	11765,11773,11774,11775,11776,12847,13429,13855,20334,22041,54160,54161,56447,64933,66251,67602,67898,70349,71732,75608,77038,80743,99683,104015,213827,218811,269774	Ap1g1,Ap2m1,Ap3b1,Ap3b2,Ap3d1,Copa,Dnm1,Epn2,Sec23a,Trf,Copg2,Copg1,Copz1,Ap3m2,Arfgap3,Necap1,Pef1,Copb1,Vps11,Chmp4b,Arfgap2,Vps16,Sec24b,Synj1,Arcn1,Sec24c,Aak1
19_Member	GO Cellular Components	GO:0030137	COPI-coated vesicle	-8.83024	-7.25744	13/28	11840,12847,14683,23969,54130,54160,54161,56447,66251,68581,70349,77038,213827	Arf1,Copa,Gnas,Pacsin1,Actr1a,Copg2,Copg1,Copz1,Arfgap3,Tmed10,Copb1,Arfgap2,Arcn1
19_Member	GO Cellular Components	GO:0030135	coated vesicle	-8.80215	-7.24231	34/182	11765,11773,11820,11840,12847,12891,13855,14683,16971,17920,18222,20334,20661,22041,23969,53612,54130,54160,54161,54198,56041,56447,66251,67602,67898,68365,68581,70349,77038,80743,99683,107767,213827,218811	Ap1g1,Ap2m1,App,Arf1,Copa,Cpne6,Epn2,Gnas,Lrp1,Myo6,Numb,Sec23a,Sort1,Trf,Pacsin1,Vti1b,Actr1a,Copg2,Copg1,Snx3,Uso1,Copz1,Arfgap3,Necap1,Pef1,Rab14,Tmed10,Copb1,Arfgap2,Vps16,Sec24b,Scamp1,Arcn1,Sec24c
19_Member	GO Cellular Components	GO:0030120	vesicle coat	-7.81945	-6.35652	17/57	11765,11773,12847,13855,20334,22041,54160,54161,56447,66251,67602,67898,70349,77038,99683,213827,218811	Ap1g1,Ap2m1,Copa,Epn2,Sec23a,Trf,Copg2,Copg1,Copz1,Arfgap3,Necap1,Pef1,Copb1,Arfgap2,Sec24b,Arcn1,Sec24c
19_Member	GO Cellular Components	GO:0005798	Golgi-associated vesicle	-7.70737	-6.27882	27/136	11765,11820,11840,12847,14683,18220,20334,20661,23969,26875,29873,53612,54130,54160,54161,56041,56447,66251,67898,68365,68581,70349,77038,99683,213827,218811,224020	Ap1g1,App,Arf1,Copa,Gnas,Nucb1,Sec23a,Sort1,Pacsin1,Pclo,Cspg5,Vti1b,Actr1a,Copg2,Copg1,Uso1,Copz1,Arfgap3,Pef1,Rab14,Tmed10,Copb1,Arfgap2,Sec24b,Arcn1,Sec24c,Pi4ka
19_Member	GO Cellular Components	GO:0030660	Golgi-associated vesicle membrane	-7.10421	-5.70309	17/63	11765,12847,20334,29873,53612,54160,54161,56041,56447,66251,67898,70349,77038,99683,213827,218811,224020	Ap1g1,Copa,Sec23a,Cspg5,Vti1b,Copg2,Copg1,Uso1,Copz1,Arfgap3,Pef1,Copb1,Arfgap2,Sec24b,Arcn1,Sec24c,Pi4ka
19_Member	GO Cellular Components	GO:0030662	coated vesicle membrane	-7.08139	-5.68905	19/78	11765,11773,12847,13855,20334,22041,53612,54160,54161,56041,56447,66251,67602,67898,70349,77038,99683,213827,218811	Ap1g1,Ap2m1,Copa,Epn2,Sec23a,Trf,Vti1b,Copg2,Copg1,Uso1,Copz1,Arfgap3,Necap1,Pef1,Copb1,Arfgap2,Sec24b,Arcn1,Sec24c
19_Member	GO Cellular Components	GO:0030126	COPI vesicle coat	-6.52679	-5.19514	8/14	12847,54160,54161,56447,66251,70349,77038,213827	Copa,Copg2,Copg1,Copz1,Arfgap3,Copb1,Arfgap2,Arcn1
19_Member	CORUM	CORUM:3146	Coatomer-Arf1 complex	-5.99485	-4.7131	6/8	11840,12847,54161,56447,70349,213827	Arf1,Copa,Copg1,Copz1,Copb1,Arcn1
19_Member	GO Cellular Components	GO:0030663	COPI-coated vesicle membrane	-5.24072	-4.03022	8/19	12847,54160,54161,56447,66251,70349,77038,213827	Copa,Copg2,Copg1,Copz1,Arfgap3,Copb1,Arfgap2,Arcn1
19_Member	CORUM	CORUM:3145	Coatomer complex	-4.88478	-3.70727	5/7	12847,54161,56447,70349,213827	Copa,Copg1,Copz1,Copb1,Arcn1
19_Member	CORUM	CORUM:3148	Arf1-beta/delta-coat protein subcomplex	-3.69719	-2.64924	3/3	11840,70349,213827	Arf1,Copb1,Arcn1
20_Summary	GO Cellular Components	GO:0005790	smooth endoplasmic reticulum	-10.3761	-8.70804	16/36	12282,12330,14265,14827,14828,16438,17756,17918,18798,19035,22027,57776,67397,71853,104001,110954,66861,12321,12759,16976,66073,66753,93684	Hyou1,Canx,Fmr1,Pdia3,Hspa5,Itpr1,Map2,Myo5a,Plcb4,Ppib,Hsp90b1,Ttyh1,Erp29,Pdia6,Rtn1,Rpl10,Dnajc10,Calu,Clu,Lrpap1,Txndc12,Erlec1,Selenof
20_Member	GO Cellular Components	GO:0005790	smooth endoplasmic reticulum	-10.3761	-8.70804	16/36	12282,12330,14265,14827,14828,16438,17756,17918,18798,19035,22027,57776,67397,71853,104001,110954	Hyou1,Canx,Fmr1,Pdia3,Hspa5,Itpr1,Map2,Myo5a,Plcb4,Ppib,Hsp90b1,Ttyh1,Erp29,Pdia6,Rtn1,Rpl10
20_Member	GO Cellular Components	GO:0034663	endoplasmic reticulum chaperone complex	-4.31838	-3.20019	6/13	12282,14828,19035,22027,66861,71853	Hyou1,Hspa5,Ppib,Hsp90b1,Dnajc10,Pdia6
20_Member	GO Cellular Components	GO:0005788	endoplasmic reticulum lumen	-3.18974	-2.19359	11/60	12321,12759,14828,16976,22027,66073,66753,66861,67397,71853,93684	Calu,Clu,Hspa5,Lrpap1,Hsp90b1,Txndc12,Erlec1,Dnajc10,Erp29,Pdia6,Selenof
20_Member	CORUM	CORUM:414	(ER)-localized multiprotein complex, in absence of Ig heavy chains	-2.93342	-1.97564	4/9	12282,14828,19035,22027	Hyou1,Hspa5,Ppib,Hsp90b1
20_Member	CORUM	CORUM:413	(ER)-localized multiprotein complex, Ig heavy chains associated	-2.73214	-1.80517	4/10	12282,14828,19035,22027	Hyou1,Hspa5,Ppib,Hsp90b1

## Sheet: Table S5B_Pathway_Enrichment
	Table S5B_Pathway_Enrichment of actively translating proteins in murine brain tissue by Metscape
GroupID	Category	Term	Description	LogP	Log(q-value)	InTerm_InList	Genes	Symbols
1_Summary	GO Biological Processes	GO:0060627	regulation of vesicle-mediated transport	-29.3548	-25.1946	111/568	11625,11765,11773,11784,11806,11816,11840,11938,12298,12306,12322,12568,12759,12889,12890,13429,13660,13855,14161,14265,15387,15444,15481,16568,16971,16976,17698,17756,17918,17920,17957,17999,18195,18222,18571,18607,18751,18752,18754,18952,19055,19058,19063,19326,19338,19339,19342,19344,19349,19684,20239,20362,20479,20971,20981,22041,22088,22317,23969,26395,26413,26417,26875,26950,28040,29873,529…	Ahsg,Ap1g1,Ap2m1,Apba2,Apoa1,Apoe,Arf1,Atp2a2,Cacnb4,Anxa2,Camk2a,Cdk5,Clu,Cplx1,Cplx2,Dnm1,Ehd1,Epn2,Fga,Fmr1,Hnrnpk,Hpca,Hspa8,Kif3a,Lrp1,Lrpap1,Msn,Map2,Myo5a,Myo6,Napb,Nedd4,Nsf,Numb,Pdcd6ip,Pdpk1,Prkcb,Prkcg,Prkce,Sept4,Ppp3ca,Ppp3r1,Ppt1,Rab11b,Rab33b,Rab3a,Rab4b,Rab5b,Rab7,Rdx,Atxn2,Sept8,Vps4b,Sdc4,Syt3,Trf,Tsg101,Vamp1,Pacsin1,Map2k1,Mapk1,Mapk3,Pclo,Vsnl1,D6Wsu163e,Cspg5,Ahi1,Snx3,Atp6a…
1_Member	GO Biological Processes	GO:0060627	regulation of vesicle-mediated transport	-29.3548	-25.1946	111/568	11625,11765,11773,11784,11806,11816,11840,11938,12298,12306,12322,12568,12759,12889,12890,13429,13660,13855,14161,14265,15387,15444,15481,16568,16971,16976,17698,17756,17918,17920,17957,17999,18195,18222,18571,18607,18751,18752,18754,18952,19055,19058,19063,19326,19338,19339,19342,19344,19349,19684,20239,20362,20479,20971,20981,22041,22088,22317,23969,26395,26413,26417,26875,26950,28040,29873,529…	Ahsg,Ap1g1,Ap2m1,Apba2,Apoa1,Apoe,Arf1,Atp2a2,Cacnb4,Anxa2,Camk2a,Cdk5,Clu,Cplx1,Cplx2,Dnm1,Ehd1,Epn2,Fga,Fmr1,Hnrnpk,Hpca,Hspa8,Kif3a,Lrp1,Lrpap1,Msn,Map2,Myo5a,Myo6,Napb,Nedd4,Nsf,Numb,Pdcd6ip,Pdpk1,Prkcb,Prkcg,Prkce,Sept4,Ppp3ca,Ppp3r1,Ppt1,Rab11b,Rab33b,Rab3a,Rab4b,Rab5b,Rab7,Rdx,Atxn2,Sept8,Vps4b,Sdc4,Syt3,Trf,Tsg101,Vamp1,Pacsin1,Map2k1,Mapk1,Mapk3,Pclo,Vsnl1,D6Wsu163e,Cspg5,Ahi1,Snx3,Atp6a…
1_Member	GO Biological Processes	GO:0051640	organelle localization	-29.146	-25.1946	114/598	11657,11774,11775,11776,11784,11840,11938,12298,12322,12387,12540,12568,12652,12889,12890,13424,13426,13429,14265,16211,16560,16574,17755,17756,17758,17762,17886,17918,17920,17957,18189,18195,18221,18472,18607,18751,18752,18754,19326,19339,19384,20479,20614,22210,22223,22317,22365,22631,24015,26395,26554,26875,28040,29873,51810,52906,54130,54160,54161,54411,54418,54525,54645,56041,56444,56491,566…	Alb,Ap3b1,Ap3b2,Ap3d1,Apba2,Arf1,Atp2a2,Cacnb4,Camk2a,Ctnnb1,Cdc42,Cdk5,Chga,Cplx1,Cplx2,Dync1h1,Dync1i1,Dnm1,Fmr1,Kpnb1,Kif1a,Kif5c,Map1b,Map2,Map4,Mapt,Myh9,Myo5a,Myo6,Napb,Nrxn1,Nsf,Nudc,Pafah1b1,Pdpk1,Prkcb,Prkcg,Prkce,Rab11b,Rab3a,Ran,Vps4b,Snap25,Ube2b,Uchl1,Vamp1,Vps45,Ywhaz,Abce1,Map2k1,Cul3,Pclo,D6Wsu163e,Cspg5,Hnrnpu,Ahi1,Actr1a,Copg2,Copg1,Atp6ap1,Fmn2,Syt7,Gripap1,Uso1,Actr10,Vapb,Gsk…
1_Member	GO Biological Processes	GO:0051656	establishment of organelle localization	-28.5675	-24.7922	99/474	11774,11775,11776,11784,11840,11938,12298,12322,12387,12540,12568,12652,12889,12890,13424,13426,13429,14265,16211,16560,16574,17755,17756,17758,17762,17886,17918,17920,17957,18221,18472,18607,18751,18752,18754,19326,19339,19384,20479,20614,22210,22223,22317,22631,24015,26395,26554,26875,28040,29873,51810,52906,54130,54160,54161,54411,54418,54525,54645,56444,56637,59040,59041,60595,64009,64933,662…	Ap3b1,Ap3b2,Ap3d1,Apba2,Arf1,Atp2a2,Cacnb4,Camk2a,Ctnnb1,Cdc42,Cdk5,Chga,Cplx1,Cplx2,Dync1h1,Dync1i1,Dnm1,Fmr1,Kpnb1,Kif1a,Kif5c,Map1b,Map2,Map4,Mapt,Myh9,Myo5a,Myo6,Napb,Nudc,Pafah1b1,Pdpk1,Prkcb,Prkcg,Prkce,Rab11b,Rab3a,Ran,Vps4b,Snap25,Ube2b,Uchl1,Vamp1,Ywhaz,Abce1,Map2k1,Cul3,Pclo,D6Wsu163e,Cspg5,Hnrnpu,Ahi1,Actr1a,Copg2,Copg1,Atp6ap1,Fmn2,Syt7,Gripap1,Actr10,Gsk3b,Rhot1,Stk25,Actn4,Syne1,Ap3…
1_Member	GO Biological Processes	GO:0006887	exocytosis	-23.7398	-20.4416	80/375	11765,11784,11840,11938,12298,12322,12568,12652,12889,12890,13829,14161,14265,17886,17918,17920,17957,18189,18195,18479,18571,18607,18751,18752,18754,18952,19326,19338,19339,19349,20479,20614,20971,20981,22088,22317,22365,22631,26875,26950,28040,29873,54411,54525,56013,56382,56398,56637,67295,67474,67826,68581,69017,69938,71732,74006,76499,76707,76787,77579,84095,99371,99571,102058,104015,107767,…	Ap1g1,Apba2,Arf1,Atp2a2,Cacnb4,Camk2a,Cdk5,Chga,Cplx1,Cplx2,Dmtn,Fga,Fmr1,Myh9,Myo5a,Myo6,Napb,Nrxn1,Nsf,Pak1,Pdcd6ip,Pdpk1,Prkcb,Prkcg,Prkce,Sept4,Rab11b,Rab33b,Rab3a,Rab7,Vps4b,Snap25,Sdc4,Syt3,Tsg101,Vamp1,Vps45,Ywhaz,Pclo,Vsnl1,D6Wsu163e,Cspg5,Atp6ap1,Syt7,Srcin1,Rab9,Chp1,Gsk3b,Rab3c,Snap29,Snap47,Tmed10,Prrt2,Scrn1,Vps11,Dnm1l,Clasp2,Clasp1,Ppfia3,Myh10,Pi4k2a,Arfgef2,Fgg,Exoc8,Synj1,Scamp1…
1_Member	GO Biological Processes	GO:0051650	establishment of vesicle localization	-22.6923	-19.5538	64/259	11774,11775,11776,11784,11840,11938,12298,12322,12387,12568,12889,12890,13424,13426,13429,14265,16560,16574,17756,17918,17920,17957,18472,18751,18752,18754,19326,19339,20614,22317,26395,26554,26875,29873,52906,54525,54645,56637,60595,64933,66251,67474,67826,67898,68581,69017,69654,73178,74006,76499,76707,76787,77038,103967,104015,108124,110380,111173,207227,213760,216963,226407,271457,320127	Ap3b1,Ap3b2,Ap3d1,Apba2,Arf1,Atp2a2,Cacnb4,Camk2a,Ctnnb1,Cdk5,Cplx1,Cplx2,Dync1h1,Dync1i1,Dnm1,Fmr1,Kif1a,Kif5c,Map2,Myo5a,Myo6,Napb,Pafah1b1,Prkcb,Prkcg,Prkce,Rab11b,Rab3a,Snap25,Vamp1,Map2k1,Cul3,Pclo,Cspg5,Ahi1,Syt7,Gripap1,Gsk3b,Actn4,Ap3m2,Arfgap3,Snap29,Snap47,Pef1,Tmed10,Prrt2,Dctn2,Wasl,Dnm1l,Clasp2,Clasp1,Ppfia3,Arfgap2,Dnm3,Synj1,Napa,Shroom2,Erc1,Stxbp5l,Prepl,Git1,Rab3gap1,Rab5a,Dgki
1_Member	GO Biological Processes	GO:0051648	vesicle localization	-22.3452	-19.2689	66/278	11774,11775,11776,11784,11840,11938,12298,12322,12387,12568,12889,12890,13424,13426,13429,14265,16560,16574,17756,17918,17920,17957,18189,18472,18751,18752,18754,19326,19339,20614,22317,26395,26554,26875,29873,52906,54525,54645,56041,56637,60595,64933,66251,67474,67826,67898,68581,69017,69654,73178,74006,76499,76707,76787,77038,103967,104015,108124,110380,111173,207227,213760,216963,226407,271457…	Ap3b1,Ap3b2,Ap3d1,Apba2,Arf1,Atp2a2,Cacnb4,Camk2a,Ctnnb1,Cdk5,Cplx1,Cplx2,Dync1h1,Dync1i1,Dnm1,Fmr1,Kif1a,Kif5c,Map2,Myo5a,Myo6,Napb,Nrxn1,Pafah1b1,Prkcb,Prkcg,Prkce,Rab11b,Rab3a,Snap25,Vamp1,Map2k1,Cul3,Pclo,Cspg5,Ahi1,Syt7,Gripap1,Uso1,Gsk3b,Actn4,Ap3m2,Arfgap3,Snap29,Snap47,Pef1,Tmed10,Prrt2,Dctn2,Wasl,Dnm1l,Clasp2,Clasp1,Ppfia3,Arfgap2,Dnm3,Synj1,Napa,Shroom2,Erc1,Stxbp5l,Prepl,Git1,Rab3gap1,…
1_Member	GO Biological Processes	GO:0099003	vesicle-mediated transport in synapse	-18.7374	-15.883	57/247	11773,11774,11775,11776,11784,11840,11938,12298,12322,12330,12387,12568,12889,12890,13429,14265,14824,15444,16574,17756,17920,17957,17999,18222,18751,18752,18754,19058,19339,20614,22317,23969,26414,26875,29873,54525,56637,64009,64933,65114,67474,67826,67979,69017,72685,74006,76787,103967,104015,108124,111173,207227,213760,216963,226407,271457,320127	Ap2m1,Ap3b1,Ap3b2,Ap3d1,Apba2,Arf1,Atp2a2,Cacnb4,Camk2a,Canx,Ctnnb1,Cdk5,Cplx1,Cplx2,Dnm1,Fmr1,Grn,Hpca,Kif5c,Map2,Myo6,Napb,Nedd4,Numb,Prkcb,Prkcg,Prkce,Ppp3r1,Rab3a,Snap25,Vamp1,Pacsin1,Mapk10,Pclo,Cspg5,Syt7,Gsk3b,Syne1,Ap3m2,Vps35,Snap29,Snap47,Atad1,Prrt2,Dnajc6,Dnm1l,Ppfia3,Dnm3,Synj1,Napa,Erc1,Stxbp5l,Prepl,Git1,Rab3gap1,Rab5a,Dgki
1_Member	GO Biological Processes	GO:0017157	regulation of exocytosis	-16.9179	-14.2452	54/244	11765,11784,11840,11938,12298,12322,12568,12889,12890,14161,14265,17918,17920,17957,18195,18571,18607,18751,18752,18754,18952,19338,19339,19349,20479,20971,20981,22088,22317,26875,26950,28040,29873,54411,54525,56382,56637,67295,69017,74006,76499,76707,99571,108124,109934,110135,110279,207227,213760,216344,216963,226407,271457,320127	Ap1g1,Apba2,Arf1,Atp2a2,Cacnb4,Camk2a,Cdk5,Cplx1,Cplx2,Fga,Fmr1,Myo5a,Myo6,Napb,Nsf,Pdcd6ip,Pdpk1,Prkcb,Prkcg,Prkce,Sept4,Rab33b,Rab3a,Rab7,Vps4b,Sdc4,Syt3,Tsg101,Vamp1,Pclo,Vsnl1,D6Wsu163e,Cspg5,Atp6ap1,Syt7,Rab9,Gsk3b,Rab3c,Prrt2,Dnm1l,Clasp2,Clasp1,Fgg,Napa,Abr,Fgb,Bcr,Stxbp5l,Prepl,Rab21,Git1,Rab3gap1,Rab5a,Dgki
1_Member	GO Biological Processes	GO:0050804	modulation of chemical synaptic transmission	-15.9297	-13.3403	96/662	11784,11816,11820,11840,11938,12298,12308,12322,12323,12552,12568,12889,12890,13001,13116,13429,13684,13838,14265,14360,14645,14677,14705,14810,14811,14812,14815,15387,15572,16513,16728,17762,17920,17957,17999,18125,18164,18189,18212,18412,18479,18747,18751,18752,18754,18798,19055,19058,19085,19122,19184,19229,19339,19417,20614,20720,22317,22628,26413,29873,50997,54393,54525,56637,59040,64009,660…	Apba2,Apoe,App,Arf1,Atp2a2,Cacnb4,Calb2,Camk2a,Camk2b,Cdh11,Cdk5,Cplx1,Cplx2,Csnk2b,Cyp46a1,Dnm1,Eif4e,Epha4,Fmr1,Fyn,Glul,Gnai1,Bscl2,Grin1,Grin2a,Grin2b,Nr3c1,Hnrnpk,Elavl4,Kcnj10,L1cam,Mapt,Myo6,Napb,Nedd4,Nos1,Nptx1,Nrxn1,Ntrk2,Sqstm1,Pak1,Prkaca,Prkcb,Prkcg,Prkce,Plcb4,Ppp3ca,Ppp3r1,Prkar1b,Prnp,Psmc5,Ptk2b,Rab3a,Rasgrf1,Snap25,Serpine2,Vamp1,Ywhag,Mapk1,Cspg5,Mpp2,Gabbr1,Syt7,Gsk3b,Rhot1,Sy…
1_Member	GO Biological Processes	GO:0099177	regulation of trans-synaptic signaling	-15.8862	-13.3283	96/663	11784,11816,11820,11840,11938,12298,12308,12322,12323,12552,12568,12889,12890,13001,13116,13429,13684,13838,14265,14360,14645,14677,14705,14810,14811,14812,14815,15387,15572,16513,16728,17762,17920,17957,17999,18125,18164,18189,18212,18412,18479,18747,18751,18752,18754,18798,19055,19058,19085,19122,19184,19229,19339,19417,20614,20720,22317,22628,26413,29873,50997,54393,54525,56637,59040,64009,660…	Apba2,Apoe,App,Arf1,Atp2a2,Cacnb4,Calb2,Camk2a,Camk2b,Cdh11,Cdk5,Cplx1,Cplx2,Csnk2b,Cyp46a1,Dnm1,Eif4e,Epha4,Fmr1,Fyn,Glul,Gnai1,Bscl2,Grin1,Grin2a,Grin2b,Nr3c1,Hnrnpk,Elavl4,Kcnj10,L1cam,Mapt,Myo6,Napb,Nedd4,Nos1,Nptx1,Nrxn1,Ntrk2,Sqstm1,Pak1,Prkaca,Prkcb,Prkcg,Prkce,Plcb4,Ppp3ca,Ppp3r1,Prkar1b,Prnp,Psmc5,Ptk2b,Rab3a,Rasgrf1,Snap25,Serpine2,Vamp1,Ywhag,Mapk1,Cspg5,Mpp2,Gabbr1,Syt7,Gsk3b,Rhot1,Sy…
1_Member	GO Biological Processes	GO:0048489	synaptic vesicle transport	-15.8818	-13.3283	44/177	11774,11775,11776,11784,11840,11938,12298,12322,12387,12568,12889,12890,13429,14265,16574,17756,17920,17957,18751,18752,18754,19339,20614,22317,26875,29873,54525,56637,64933,67474,67826,69017,74006,76787,103967,104015,108124,111173,207227,213760,216963,226407,271457,320127	Ap3b1,Ap3b2,Ap3d1,Apba2,Arf1,Atp2a2,Cacnb4,Camk2a,Ctnnb1,Cdk5,Cplx1,Cplx2,Dnm1,Fmr1,Kif5c,Map2,Myo6,Napb,Prkcb,Prkcg,Prkce,Rab3a,Snap25,Vamp1,Pclo,Cspg5,Syt7,Gsk3b,Ap3m2,Snap29,Snap47,Prrt2,Dnm1l,Ppfia3,Dnm3,Synj1,Napa,Erc1,Stxbp5l,Prepl,Git1,Rab3gap1,Rab5a,Dgki
1_Member	GO Biological Processes	GO:0097480	establishment of synaptic vesicle localization	-15.8818	-13.3283	44/177	11774,11775,11776,11784,11840,11938,12298,12322,12387,12568,12889,12890,13429,14265,16574,17756,17920,17957,18751,18752,18754,19339,20614,22317,26875,29873,54525,56637,64933,67474,67826,69017,74006,76787,103967,104015,108124,111173,207227,213760,216963,226407,271457,320127	Ap3b1,Ap3b2,Ap3d1,Apba2,Arf1,Atp2a2,Cacnb4,Camk2a,Ctnnb1,Cdk5,Cplx1,Cplx2,Dnm1,Fmr1,Kif5c,Map2,Myo6,Napb,Prkcb,Prkcg,Prkce,Rab3a,Snap25,Vamp1,Pclo,Cspg5,Syt7,Gsk3b,Ap3m2,Snap29,Snap47,Prrt2,Dnm1l,Ppfia3,Dnm3,Synj1,Napa,Erc1,Stxbp5l,Prepl,Git1,Rab3gap1,Rab5a,Dgki
1_Member	GO Biological Processes	GO:0097479	synaptic vesicle localization	-15.5565	-13.0523	45/188	11774,11775,11776,11784,11840,11938,12298,12322,12387,12568,12889,12890,13429,14265,16574,17756,17920,17957,18189,18751,18752,18754,19339,20614,22317,26875,29873,54525,56637,64933,67474,67826,69017,74006,76787,103967,104015,108124,111173,207227,213760,216963,226407,271457,320127	Ap3b1,Ap3b2,Ap3d1,Apba2,Arf1,Atp2a2,Cacnb4,Camk2a,Ctnnb1,Cdk5,Cplx1,Cplx2,Dnm1,Fmr1,Kif5c,Map2,Myo6,Napb,Nrxn1,Prkcb,Prkcg,Prkce,Rab3a,Snap25,Vamp1,Pclo,Cspg5,Syt7,Gsk3b,Ap3m2,Snap29,Snap47,Prrt2,Dnm1l,Ppfia3,Dnm3,Synj1,Napa,Erc1,Stxbp5l,Prepl,Git1,Rab3gap1,Rab5a,Dgki
1_Member	GO Biological Processes	GO:0099504	synaptic vesicle cycle	-14.524	-12.0977	48/224	11773,11774,11776,11784,11938,12298,12322,12330,12387,12568,12889,12890,13429,14265,14824,17920,17957,18189,18751,18752,18754,19085,19339,20614,22317,23969,26875,29873,54525,54645,56637,67474,67826,69017,72685,74006,76787,102866,103967,104015,108124,111173,207227,213760,216963,226407,271457,320127	Ap2m1,Ap3b1,Ap3d1,Apba2,Atp2a2,Cacnb4,Camk2a,Canx,Ctnnb1,Cdk5,Cplx1,Cplx2,Dnm1,Fmr1,Grn,Myo6,Napb,Nrxn1,Prkcb,Prkcg,Prkce,Prkar1b,Rab3a,Snap25,Vamp1,Pacsin1,Pclo,Cspg5,Syt7,Gripap1,Gsk3b,Snap29,Snap47,Prrt2,Dnajc6,Dnm1l,Ppfia3,Pls3,Dnm3,Synj1,Napa,Erc1,Stxbp5l,Prepl,Git1,Rab3gap1,Rab5a,Dgki
1_Member	GO Biological Processes	GO:0007269	neurotransmitter secretion	-13.6162	-11.2829	42/186	11784,11938,12298,12322,12889,12890,14265,17920,17957,18189,18190,18212,18479,18751,18752,18754,19063,19339,19894,20614,22317,26875,29873,54525,56637,59040,67474,67826,69017,72621,74006,76787,104015,108124,111173,207227,213760,216963,226407,243725,271457,320127	Apba2,Atp2a2,Cacnb4,Camk2a,Cplx1,Cplx2,Fmr1,Myo6,Napb,Nrxn1,Nrxn2,Ntrk2,Pak1,Prkcb,Prkcg,Prkce,Ppt1,Rab3a,Rph3a,Snap25,Vamp1,Pclo,Cspg5,Syt7,Gsk3b,Rhot1,Snap29,Snap47,Prrt2,Pdzd11,Dnm1l,Ppfia3,Synj1,Napa,Erc1,Stxbp5l,Prepl,Git1,Rab3gap1,Ppp1r9a,Rab5a,Dgki
1_Member	GO Biological Processes	GO:0099643	signal release from synapse	-13.5305	-11.2075	42/187	11784,11938,12298,12322,12889,12890,14265,17920,17957,18189,18190,18212,18479,18751,18752,18754,19063,19339,19894,20614,22317,26875,29873,54525,56637,59040,67474,67826,69017,72621,74006,76787,104015,108124,111173,207227,213760,216963,226407,243725,271457,320127	Apba2,Atp2a2,Cacnb4,Camk2a,Cplx1,Cplx2,Fmr1,Myo6,Napb,Nrxn1,Nrxn2,Ntrk2,Pak1,Prkcb,Prkcg,Prkce,Ppt1,Rab3a,Rph3a,Snap25,Vamp1,Pclo,Cspg5,Syt7,Gsk3b,Rhot1,Snap29,Snap47,Prrt2,Pdzd11,Dnm1l,Ppfia3,Synj1,Napa,Erc1,Stxbp5l,Prepl,Git1,Rab3gap1,Ppp1r9a,Rab5a,Dgki
1_Member	GO Biological Processes	GO:0045055	regulated exocytosis	-12.8113	-10.5801	49/256	11765,11784,11840,11938,12298,12322,12568,12652,12889,12890,13829,14265,17886,17920,17957,18607,18751,18752,18754,19326,19339,20614,20981,22317,22631,26875,28040,29873,54525,56398,56637,67474,67826,68581,69017,74006,76787,84095,104015,108124,109934,110279,111173,207227,213760,216963,226407,271457,320127	Ap1g1,Apba2,Arf1,Atp2a2,Cacnb4,Camk2a,Cdk5,Chga,Cplx1,Cplx2,Dmtn,Fmr1,Myh9,Myo6,Napb,Pdpk1,Prkcb,Prkcg,Prkce,Rab11b,Rab3a,Snap25,Syt3,Vamp1,Ywhaz,Pclo,D6Wsu163e,Cspg5,Syt7,Chp1,Gsk3b,Snap29,Snap47,Tmed10,Prrt2,Dnm1l,Ppfia3,Pi4k2a,Synj1,Napa,Abr,Bcr,Erc1,Stxbp5l,Prepl,Git1,Rab3gap1,Rab5a,Dgki
1_Member	GO Biological Processes	GO:0001505	regulation of neurotransmitter levels	-12.5661	-10.3629	61/373	11651,11784,11938,12298,12322,12759,12846,12889,12890,14265,14395,14415,14417,14811,15519,16513,16549,17920,17957,18125,18189,18190,18212,18479,18574,18751,18752,18754,18984,19063,19229,19339,19878,19894,20614,22317,26875,29873,54525,56448,56637,59040,65106,67474,67826,69017,72621,74006,76787,104015,108124,111173,207227,213760,216963,226407,236539,243725,268860,271457,320127	Akt1,Apba2,Atp2a2,Cacnb4,Camk2a,Clu,Comt,Cplx1,Cplx2,Fmr1,Gabra2,Gad1,Gad2,Grin2a,Hsp90aa1,Kcnj10,Khsrp,Myo6,Napb,Nos1,Nrxn1,Nrxn2,Ntrk2,Pak1,Pde1b,Prkcb,Prkcg,Prkce,Por,Ppt1,Ptk2b,Rab3a,Rock2,Rph3a,Snap25,Vamp1,Pclo,Cspg5,Syt7,Cyp2d22,Gsk3b,Rhot1,Arl6ip5,Snap29,Snap47,Prrt2,Pdzd11,Dnm1l,Ppfia3,Synj1,Napa,Erc1,Stxbp5l,Prepl,Git1,Rab3gap1,Phgdh,Ppp1r9a,Abat,Rab5a,Dgki
1_Member	GO Biological Processes	GO:0098693	regulation of synaptic vesicle cycle	-12.4552	-10.271	35/144	11773,11784,11938,12298,12322,12889,12890,13429,14265,17920,17957,18189,18751,18752,18754,19085,19339,22317,29873,54525,54645,56637,67474,69017,74006,102866,103967,104015,108124,207227,213760,216963,226407,271457,320127	Ap2m1,Apba2,Atp2a2,Cacnb4,Camk2a,Cplx1,Cplx2,Dnm1,Fmr1,Myo6,Napb,Nrxn1,Prkcb,Prkcg,Prkce,Prkar1b,Rab3a,Vamp1,Cspg5,Syt7,Gripap1,Gsk3b,Snap29,Prrt2,Dnm1l,Pls3,Dnm3,Synj1,Napa,Stxbp5l,Prepl,Git1,Rab3gap1,Rab5a,Dgki
1_Member	GO Biological Processes	GO:0006836	neurotransmitter transport	-11.9072	-9.78518	52/298	11784,11938,12298,12322,12889,12890,14265,14395,16513,17920,17957,18125,18189,18190,18212,18479,18751,18752,18754,19063,19339,19894,20614,22317,22631,26875,29873,54393,54525,56327,56637,59040,65106,67474,67826,69017,71803,72621,74006,76787,104015,108124,111173,207227,213760,216963,226407,229706,243725,268860,271457,320127	Apba2,Atp2a2,Cacnb4,Camk2a,Cplx1,Cplx2,Fmr1,Gabra2,Kcnj10,Myo6,Napb,Nos1,Nrxn1,Nrxn2,Ntrk2,Pak1,Prkcb,Prkcg,Prkce,Ppt1,Rab3a,Rph3a,Snap25,Vamp1,Ywhaz,Pclo,Cspg5,Gabbr1,Syt7,Arl2,Gsk3b,Rhot1,Arl6ip5,Snap29,Snap47,Prrt2,Slc25a18,Pdzd11,Dnm1l,Ppfia3,Synj1,Napa,Erc1,Stxbp5l,Prepl,Git1,Rab3gap1,Slc6a17,Ppp1r9a,Abat,Rab5a,Dgki
1_Member	GO Biological Processes	GO:0016079	synaptic vesicle exocytosis	-11.478	-9.38397	33/139	11784,11938,12298,12322,12889,12890,14265,17920,17957,18751,18752,18754,19339,20614,22317,26875,29873,54525,56637,67474,67826,69017,74006,76787,104015,108124,111173,207227,213760,216963,226407,271457,320127	Apba2,Atp2a2,Cacnb4,Camk2a,Cplx1,Cplx2,Fmr1,Myo6,Napb,Prkcb,Prkcg,Prkce,Rab3a,Snap25,Vamp1,Pclo,Cspg5,Syt7,Gsk3b,Snap29,Snap47,Prrt2,Dnm1l,Ppfia3,Synj1,Napa,Erc1,Stxbp5l,Prepl,Git1,Rab3gap1,Rab5a,Dgki
1_Member	GO Biological Processes	GO:0017156	calcium ion regulated exocytosis	-11.1604	-9.0812	37/175	11784,11840,11938,12298,12322,12568,12889,12890,14265,17920,17957,18751,18752,18754,19339,20614,20981,22317,26875,29873,54525,56398,56637,67474,67826,69017,74006,76787,104015,108124,111173,207227,213760,216963,226407,271457,320127	Apba2,Arf1,Atp2a2,Cacnb4,Camk2a,Cdk5,Cplx1,Cplx2,Fmr1,Myo6,Napb,Prkcb,Prkcg,Prkce,Rab3a,Snap25,Syt3,Vamp1,Pclo,Cspg5,Syt7,Chp1,Gsk3b,Snap29,Snap47,Prrt2,Dnm1l,Ppfia3,Synj1,Napa,Erc1,Stxbp5l,Prepl,Git1,Rab3gap1,Rab5a,Dgki
1_Member	GO Biological Processes	GO:0023061	signal release	-10.4836	-8.4617	71/524	11784,11938,12298,12322,12652,12876,12889,12890,12894,14161,14265,14609,14645,14683,15107,16971,17918,17920,17957,18125,18189,18190,18212,18479,18642,18751,18752,18754,19055,19063,19247,19326,19339,19894,20394,20614,22317,22631,26875,26950,29873,54126,54393,54525,56205,56637,59040,65114,67474,67826,69017,72621,74006,76055,76787,78894,99571,104015,108124,109689,110135,111173,207227,213760,216963,2…	Apba2,Atp2a2,Cacnb4,Camk2a,Chga,Cpe,Cplx1,Cplx2,Cpt1a,Fga,Fmr1,Gja1,Glul,Gnas,Hadh,Lrp1,Myo5a,Myo6,Napb,Nos1,Nrxn1,Nrxn2,Ntrk2,Pak1,Pfkm,Prkcb,Prkcg,Prkce,Ppp3ca,Ppt1,Ptpn11,Rab11b,Rab3a,Rph3a,Scg5,Snap25,Vamp1,Ywhaz,Pclo,Vsnl1,Cspg5,Arhgef7,Gabbr1,Syt7,Ensa,Gsk3b,Rhot1,Vps35,Snap29,Snap47,Prrt2,Pdzd11,Dnm1l,Oga,Ppfia3,Aacs,Fgg,Synj1,Napa,Arrb1,Fgb,Erc1,Stxbp5l,Prepl,Git1,Rab3gap1,Ppp1r9a,Abat,Ra…
1_Member	GO Biological Processes	GO:1902803	regulation of synaptic vesicle transport	-10.2654	-8.25608	27/106	11784,11938,12298,12322,12889,12890,14265,17756,17920,17957,18751,18752,18754,19339,22317,29873,54525,56637,69017,74006,108124,207227,213760,216963,226407,271457,320127	Apba2,Atp2a2,Cacnb4,Camk2a,Cplx1,Cplx2,Fmr1,Map2,Myo6,Napb,Prkcb,Prkcg,Prkce,Rab3a,Vamp1,Cspg5,Syt7,Gsk3b,Prrt2,Dnm1l,Napa,Stxbp5l,Prepl,Git1,Rab3gap1,Rab5a,Dgki
1_Member	GO Biological Processes	GO:2000300	regulation of synaptic vesicle exocytosis	-10.0209	-8.03093	26/101	11784,11938,12298,12322,12889,12890,14265,17920,17957,18751,18752,18754,19339,22317,29873,54525,56637,69017,74006,108124,207227,213760,216963,226407,271457,320127	Apba2,Atp2a2,Cacnb4,Camk2a,Cplx1,Cplx2,Fmr1,Myo6,Napb,Prkcb,Prkcg,Prkce,Rab3a,Vamp1,Cspg5,Syt7,Gsk3b,Prrt2,Dnm1l,Napa,Stxbp5l,Prepl,Git1,Rab3gap1,Rab5a,Dgki
1_Member	GO Biological Processes	GO:0046928	regulation of neurotransmitter secretion	-9.22533	-7.28681	29/133	11784,11938,12298,12322,12889,12890,14265,17920,17957,18212,18751,18752,18754,19339,22317,29873,54525,56637,59040,69017,74006,108124,207227,213760,216963,226407,243725,271457,320127	Apba2,Atp2a2,Cacnb4,Camk2a,Cplx1,Cplx2,Fmr1,Myo6,Napb,Ntrk2,Prkcb,Prkcg,Prkce,Rab3a,Vamp1,Cspg5,Syt7,Gsk3b,Rhot1,Prrt2,Dnm1l,Napa,Stxbp5l,Prepl,Git1,Rab3gap1,Ppp1r9a,Rab5a,Dgki
1_Member	GO Biological Processes	GO:0017158	regulation of calcium ion-dependent exocytosis	-8.98416	-7.07023	29/136	11784,11840,11938,12298,12322,12568,12889,12890,14265,17920,17957,18751,18752,18754,19339,20981,22317,29873,54525,56637,69017,74006,108124,207227,213760,216963,226407,271457,320127	Apba2,Arf1,Atp2a2,Cacnb4,Camk2a,Cdk5,Cplx1,Cplx2,Fmr1,Myo6,Napb,Prkcb,Prkcg,Prkce,Rab3a,Syt3,Vamp1,Cspg5,Syt7,Gsk3b,Prrt2,Dnm1l,Napa,Stxbp5l,Prepl,Git1,Rab3gap1,Rab5a,Dgki
1_Member	GO Biological Processes	GO:1903305	regulation of regulated secretory pathway	-8.54707	-6.66203	34/186	11765,11784,11840,11938,12298,12322,12568,12889,12890,14265,17920,17957,18607,18751,18752,18754,19339,20981,22317,28040,29873,54525,56637,69017,74006,108124,109934,110279,207227,213760,216963,226407,271457,320127	Ap1g1,Apba2,Arf1,Atp2a2,Cacnb4,Camk2a,Cdk5,Cplx1,Cplx2,Fmr1,Myo6,Napb,Pdpk1,Prkcb,Prkcg,Prkce,Rab3a,Syt3,Vamp1,D6Wsu163e,Cspg5,Syt7,Gsk3b,Prrt2,Dnm1l,Napa,Abr,Bcr,Stxbp5l,Prepl,Git1,Rab3gap1,Rab5a,Dgki
1_Member	GO Biological Processes	GO:0051588	regulation of neurotransmitter transport	-8.47579	-6.59446	33/178	11784,11938,12298,12322,12889,12890,14265,17920,17957,18125,18212,18751,18752,18754,19339,22317,29873,54393,54525,56637,59040,65106,69017,74006,108124,207227,213760,216963,226407,243725,268860,271457,320127	Apba2,Atp2a2,Cacnb4,Camk2a,Cplx1,Cplx2,Fmr1,Myo6,Napb,Nos1,Ntrk2,Prkcb,Prkcg,Prkce,Rab3a,Vamp1,Cspg5,Gabbr1,Syt7,Gsk3b,Rhot1,Arl6ip5,Prrt2,Dnm1l,Napa,Stxbp5l,Prepl,Git1,Rab3gap1,Ppp1r9a,Abat,Rab5a,Dgki
1_Member	GO Biological Processes	GO:0048167	regulation of synaptic plasticity	-6.62072	-4.92808	47/361	11816,11820,11840,12308,12322,12323,12568,12890,13116,13838,14265,14810,14811,14812,14815,15387,16513,17762,17920,18125,18212,18412,18479,19122,19229,19339,19417,20614,20720,22628,26413,50997,54525,56637,66082,67826,69017,76089,76787,94229,104027,108100,226407,243725,271457,320127,381677	Apoe,App,Arf1,Calb2,Camk2a,Camk2b,Cdk5,Cplx2,Cyp46a1,Epha4,Fmr1,Grin1,Grin2a,Grin2b,Nr3c1,Hnrnpk,Kcnj10,Mapt,Myo6,Nos1,Ntrk2,Sqstm1,Pak1,Prnp,Ptk2b,Rab3a,Rasgrf1,Snap25,Serpine2,Ywhag,Mapk1,Mpp2,Syt7,Gsk3b,Abhd6,Snap47,Prrt2,Rapgef2,Ppfia3,Slc4a10,Synpo,Baiap2,Rab3gap1,Ppp1r9a,Rab5a,Dgki,Vgf
1_Member	GO Biological Processes	GO:0050806	positive regulation of synaptic transmission	-2.81386	-1.63372	35/351	11816,11820,12308,12323,13116,13838,14265,14645,14810,14811,14812,15387,18125,18189,18212,18412,18479,18754,19122,19229,19339,20614,20720,26413,50997,54525,56637,67826,69017,74006,108100,110355,226407,243725,268860	Apoe,App,Calb2,Camk2b,Cyp46a1,Epha4,Fmr1,Glul,Grin1,Grin2a,Grin2b,Hnrnpk,Nos1,Nrxn1,Ntrk2,Sqstm1,Pak1,Prkce,Prnp,Ptk2b,Rab3a,Snap25,Serpine2,Mapk1,Mpp2,Syt7,Gsk3b,Snap47,Prrt2,Dnm1l,Baiap2,Grk2,Rab3gap1,Ppp1r9a,Abat
2_Summary	Reactome Gene Sets	R-MMU-5653656	Vesicle-mediated transport	-27.0925	-23.4422	107/565	11657,11765,11773,11774,11806,11816,11820,11840,11842,11843,11844,12492,12847,13424,13426,13429,13854,13855,14319,14567,14569,14609,14784,15458,15481,16563,16564,16568,16971,17957,18002,18195,18472,18475,19326,19330,19338,19339,19344,19346,19349,20334,20479,20661,22027,22041,22042,22088,22365,22428,23969,26572,26894,53598,54130,54160,54161,54609,56041,56382,56444,56447,59288,66251,66905,66914,674…	Alb,Ap1g1,Ap2m1,Ap3b1,Apoa1,Apoe,App,Arf1,Arf3,Arf4,Arf5,Scarb2,Copa,Dync1h1,Dync1i1,Dnm1,Epn1,Epn2,Fth1,Gdi1,Gdi2,Gja1,Grb2,Hpx,Hspa8,Kif2a,Kif21a,Kif3a,Lrp1,Napb,Nedd8,Nsf,Pafah1b1,Pafah1b2,Rab11b,Rab18,Rab33b,Rab3a,Rab5b,Rab6a,Rab7,Sec23a,Vps4b,Sort1,Hsp90b1,Trf,Tfrc,Tsg101,Vps45,Dctn6,Pacsin1,Cops3,Cops7a,Dctn3,Actr1a,Copg2,Copg1,Ubqln2,Uso1,Rab9,Actr10,Copz1,Dctn5,Arfgap3,Plin3,Vps28,Map1lc3…
2_Member	Reactome Gene Sets	R-MMU-5653656	Vesicle-mediated transport	-27.0925	-23.4422	107/565	11657,11765,11773,11774,11806,11816,11820,11840,11842,11843,11844,12492,12847,13424,13426,13429,13854,13855,14319,14567,14569,14609,14784,15458,15481,16563,16564,16568,16971,17957,18002,18195,18472,18475,19326,19330,19338,19339,19344,19346,19349,20334,20479,20661,22027,22041,22042,22088,22365,22428,23969,26572,26894,53598,54130,54160,54161,54609,56041,56382,56444,56447,59288,66251,66905,66914,674…	Alb,Ap1g1,Ap2m1,Ap3b1,Apoa1,Apoe,App,Arf1,Arf3,Arf4,Arf5,Scarb2,Copa,Dync1h1,Dync1i1,Dnm1,Epn1,Epn2,Fth1,Gdi1,Gdi2,Gja1,Grb2,Hpx,Hspa8,Kif2a,Kif21a,Kif3a,Lrp1,Napb,Nedd8,Nsf,Pafah1b1,Pafah1b2,Rab11b,Rab18,Rab33b,Rab3a,Rab5b,Rab6a,Rab7,Sec23a,Vps4b,Sort1,Hsp90b1,Trf,Tfrc,Tsg101,Vps45,Dctn6,Pacsin1,Cops3,Cops7a,Dctn3,Actr1a,Copg2,Copg1,Ubqln2,Uso1,Rab9,Actr10,Copz1,Dctn5,Arfgap3,Plin3,Vps28,Map1lc3…
2_Member	Reactome Gene Sets	R-MMU-199991	Membrane Trafficking	-25.4566	-21.9824	101/535	11765,11773,11774,11820,11840,11842,11843,11844,12492,12847,13424,13426,13429,13854,13855,14319,14567,14569,14609,14784,15481,16563,16564,16568,17957,18002,18195,18472,18475,19326,19330,19338,19339,19344,19346,19349,20334,20479,20661,22041,22042,22088,22365,22428,23969,26572,26894,53598,54130,54160,54161,54609,56041,56382,56444,56447,59288,66251,66905,66914,67443,67474,67602,67665,67857,68299,683…	Ap1g1,Ap2m1,Ap3b1,App,Arf1,Arf3,Arf4,Arf5,Scarb2,Copa,Dync1h1,Dync1i1,Dnm1,Epn1,Epn2,Fth1,Gdi1,Gdi2,Gja1,Grb2,Hspa8,Kif2a,Kif21a,Kif3a,Napb,Nedd8,Nsf,Pafah1b1,Pafah1b2,Rab11b,Rab18,Rab33b,Rab3a,Rab5b,Rab6a,Rab7,Sec23a,Vps4b,Sort1,Trf,Tfrc,Tsg101,Vps45,Dctn6,Pacsin1,Cops3,Cops7a,Dctn3,Actr1a,Copg2,Copg1,Ubqln2,Uso1,Rab9,Actr10,Copz1,Dctn5,Arfgap3,Plin3,Vps28,Map1lc3b,Snap29,Necap1,Dctn4,Ppp6c,Vps5…
2_Member	Reactome Gene Sets	R-MMU-8856688	Golgi-to-ER retrograde transport	-17.719	-14.9717	39/126	11840,11842,11843,11844,12847,13424,13426,16563,16564,16568,17957,18195,18472,18475,19330,19346,22428,53598,54130,54160,54161,56444,56447,59288,66251,67665,68581,69654,70349,76308,77038,98732,108123,108124,213827,226407,234663,235661,270192	Arf1,Arf3,Arf4,Arf5,Copa,Dync1h1,Dync1i1,Kif2a,Kif21a,Kif3a,Napb,Nsf,Pafah1b1,Pafah1b2,Rab18,Rab6a,Dctn6,Dctn3,Actr1a,Copg2,Copg1,Actr10,Copz1,Dctn5,Arfgap3,Dctn4,Tmed10,Dctn2,Copb1,Rab1b,Arfgap2,Rab3gap2,Napg,Napa,Arcn1,Rab3gap1,Dync1li2,Dync1li1,Rab6b
2_Member	Reactome Gene Sets	R-MMU-6811442	Intra-Golgi and retrograde Golgi-to-ER traffic	-17.0847	-14.4005	46/180	11840,11842,11843,11844,12847,13424,13426,16563,16564,16568,17957,18195,18472,18475,19330,19338,19346,22365,22428,53598,54130,54160,54161,56382,56444,56447,59288,66251,66905,67474,67665,68299,68581,69654,70349,76308,77038,98732,104303,108123,108124,213827,226407,234663,235661,270192	Arf1,Arf3,Arf4,Arf5,Copa,Dync1h1,Dync1i1,Kif2a,Kif21a,Kif3a,Napb,Nsf,Pafah1b1,Pafah1b2,Rab18,Rab33b,Rab6a,Vps45,Dctn6,Dctn3,Actr1a,Copg2,Copg1,Rab9,Actr10,Copz1,Dctn5,Arfgap3,Plin3,Snap29,Dctn4,Vps53,Tmed10,Dctn2,Copb1,Rab1b,Arfgap2,Rab3gap2,Arl1,Napg,Napa,Arcn1,Rab3gap1,Dync1li2,Dync1li1,Rab6b
2_Member	Reactome Gene Sets	R-MMU-6807878	COPI-mediated anterograde transport	-15.0888	-12.6218	31/94	11840,11842,11843,11844,12847,13424,13426,17957,18195,22428,53598,54130,54160,54161,56041,56444,56447,59288,66251,67665,68581,69654,70349,76308,77038,80297,108123,108124,213827,234663,235661	Arf1,Arf3,Arf4,Arf5,Copa,Dync1h1,Dync1i1,Napb,Nsf,Dctn6,Dctn3,Actr1a,Copg2,Copg1,Uso1,Actr10,Copz1,Dctn5,Arfgap3,Dctn4,Tmed10,Dctn2,Copb1,Rab1b,Arfgap2,Sptbn4,Napg,Napa,Arcn1,Dync1li2,Dync1li1
2_Member	Reactome Gene Sets	R-MMU-199977	ER to Golgi Anterograde Transport	-12.9965	-10.7441	36/146	11840,11842,11843,11844,12847,13424,13426,17957,18195,20334,22428,53598,54130,54160,54161,56041,56444,56447,59288,66251,67665,67857,68581,69654,70349,76308,77038,78232,80297,99683,108123,108124,213827,218811,234663,235661	Arf1,Arf3,Arf4,Arf5,Copa,Dync1h1,Dync1i1,Napb,Nsf,Sec23a,Dctn6,Dctn3,Actr1a,Copg2,Copg1,Uso1,Actr10,Copz1,Dctn5,Arfgap3,Dctn4,Ppp6c,Tmed10,Dctn2,Copb1,Rab1b,Arfgap2,Trappc6b,Sptbn4,Sec24b,Napg,Napa,Arcn1,Sec24c,Dync1li2,Dync1li1
2_Member	Reactome Gene Sets	R-MMU-446203	Asparagine N-linked glycosylation	-10.9999	-8.935	46/257	11840,11842,11843,11844,12330,12847,13424,13426,14827,17957,18195,19179,19359,20334,22428,53598,54130,54160,54161,56041,56174,56444,56447,56737,59007,59288,66251,67665,67857,68581,69654,70349,76308,77038,78232,78294,80297,99683,108123,108124,213827,218811,225896,234663,235661,269523	Arf1,Arf3,Arf4,Arf5,Canx,Copa,Dync1h1,Dync1i1,Pdia3,Napb,Nsf,Psmc1,Rad23b,Sec23a,Dctn6,Dctn3,Actr1a,Copg2,Copg1,Uso1,Nagk,Actr10,Copz1,Alg2,Ngly1,Dctn5,Arfgap3,Dctn4,Ppp6c,Tmed10,Dctn2,Copb1,Rab1b,Arfgap2,Trappc6b,Rps27a,Sptbn4,Sec24b,Napg,Napa,Arcn1,Sec24c,Ubxn1,Dync1li2,Dync1li1,Vcp
2_Member	Reactome Gene Sets	R-MMU-948021	Transport to the Golgi and subsequent modification	-10.5902	-8.56316	36/174	11840,11842,11843,11844,12847,13424,13426,17957,18195,20334,22428,53598,54130,54160,54161,56041,56444,56447,59288,66251,67665,67857,68581,69654,70349,76308,77038,78232,80297,99683,108123,108124,213827,218811,234663,235661	Arf1,Arf3,Arf4,Arf5,Copa,Dync1h1,Dync1i1,Napb,Nsf,Sec23a,Dctn6,Dctn3,Actr1a,Copg2,Copg1,Uso1,Actr10,Copz1,Dctn5,Arfgap3,Dctn4,Ppp6c,Tmed10,Dctn2,Copb1,Rab1b,Arfgap2,Trappc6b,Sptbn4,Sec24b,Napg,Napa,Arcn1,Sec24c,Dync1li2,Dync1li1
2_Member	Reactome Gene Sets	R-MMU-6811434	COPI-dependent Golgi-to-ER retrograde traffic	-7.22812	-5.46003	21/92	11840,11842,11843,11844,12847,16563,16564,16568,17957,18195,54160,54161,56447,66251,68581,70349,76308,77038,108123,108124,213827	Arf1,Arf3,Arf4,Arf5,Copa,Kif2a,Kif21a,Kif3a,Napb,Nsf,Copg2,Copg1,Copz1,Arfgap3,Tmed10,Copb1,Rab1b,Arfgap2,Napg,Napa,Arcn1
3_Summary	GO Biological Processes	GO:0032386	regulation of intracellular transport	-26.7416	-23.1881	92/438	11305,11735,11784,11840,11938,12298,12306,12322,12326,12540,12568,12889,12890,12955,13211,13424,13660,13829,14265,14360,14567,15444,16480,16568,17698,17755,17756,17762,17920,17957,18220,18479,18607,18747,18751,18752,18754,18767,19042,19047,19052,19122,19247,19326,19339,19384,19387,19684,20218,20280,20362,21849,22317,26395,26413,26417,28040,29810,29873,52163,52250,52822,54198,54525,54645,55988,563…	Abca2,Ank3,Apba2,Arf1,Atp2a2,Cacnb4,Anxa2,Camk2a,Camk4,Cdc42,Cdk5,Cplx1,Cplx2,Cryab,Dhx9,Dync1h1,Ehd1,Dmtn,Fmr1,Fyn,Gdi1,Hpca,Jup,Kif3a,Msn,Map1b,Map2,Mapt,Myo6,Napb,Nucb1,Pak1,Pdpk1,Prkaca,Prkcb,Prkcg,Prkce,Pkia,Ppm1a,Ppp1cc,Ppp2ca,Prnp,Ptpn11,Rab11b,Rab3a,Ran,Rangap1,Rdx,Khdrbs1,Scp2,Sept8,Trim28,Vamp1,Map2k1,Mapk1,Mapk3,D6Wsu163e,Bag3,Cspg5,Camk1,Reep1,Rufy3,Snx3,Syt7,Gripap1,Snx12,Chp1,Gsk3b,…
3_Member	GO Biological Processes	GO:0032386	regulation of intracellular transport	-26.7416	-23.1881	92/438	11305,11735,11784,11840,11938,12298,12306,12322,12326,12540,12568,12889,12890,12955,13211,13424,13660,13829,14265,14360,14567,15444,16480,16568,17698,17755,17756,17762,17920,17957,18220,18479,18607,18747,18751,18752,18754,18767,19042,19047,19052,19122,19247,19326,19339,19384,19387,19684,20218,20280,20362,21849,22317,26395,26413,26417,28040,29810,29873,52163,52250,52822,54198,54525,54645,55988,563…	Abca2,Ank3,Apba2,Arf1,Atp2a2,Cacnb4,Anxa2,Camk2a,Camk4,Cdc42,Cdk5,Cplx1,Cplx2,Cryab,Dhx9,Dync1h1,Ehd1,Dmtn,Fmr1,Fyn,Gdi1,Hpca,Jup,Kif3a,Msn,Map1b,Map2,Mapt,Myo6,Napb,Nucb1,Pak1,Pdpk1,Prkaca,Prkcb,Prkcg,Prkce,Pkia,Ppm1a,Ppp1cc,Ppp2ca,Prnp,Ptpn11,Rab11b,Rab3a,Ran,Rangap1,Rdx,Khdrbs1,Scp2,Sept8,Trim28,Vamp1,Map2k1,Mapk1,Mapk3,D6Wsu163e,Bag3,Cspg5,Camk1,Reep1,Rufy3,Snx3,Syt7,Gripap1,Snx12,Chp1,Gsk3b,…
3_Member	GO Biological Processes	GO:1903827	regulation of cellular protein localization	-22.7965	-19.6233	95/521	11651,11735,11773,11789,12298,12322,12323,12325,12326,12387,12461,12462,12464,12465,12466,12468,12469,12540,12568,12995,13175,13829,14360,14567,14645,14677,15387,15444,15502,15505,15516,15519,16480,16498,16568,16971,17698,17756,17762,17918,18189,18220,18222,18412,18479,18607,18747,18767,19042,19052,19122,19247,19326,19384,19387,19684,19878,20362,20411,21454,21849,22088,26395,26413,29810,52163,528…	Akt1,Ank3,Ap2m1,Apc,Cacnb4,Camk2a,Camk2b,Camk2g,Camk4,Ctnnb1,Cct2,Cct3,Cct4,Cct5,Cct6a,Cct7,Cct8,Cdc42,Cdk5,Csnk2a1,Dclk1,Dmtn,Fyn,Gdi1,Glul,Gnai1,Hnrnpk,Hpca,Dnaja1,Hsph1,Hsp90ab1,Hsp90aa1,Jup,Kcnab2,Kif3a,Lrp1,Msn,Map2,Mapt,Myo5a,Nrxn1,Nucb1,Numb,Sqstm1,Pak1,Pdpk1,Prkaca,Pkia,Ppm1a,Ppp2ca,Prnp,Ptpn11,Rab11b,Ran,Rangap1,Rdx,Rock2,Sept8,Sorbs1,Tcp1,Trim28,Tsg101,Map2k1,Mapk1,Bag3,Camk1,Rufy3,Pgrm…
3_Member	GO Biological Processes	GO:1903829	positive regulation of cellular protein localization	-14.7911	-12.3311	57/298	11651,11735,11789,12298,12326,12461,12462,12464,12465,12466,12468,12469,12540,12568,14360,14677,15387,15444,15516,16480,16568,16971,17698,17762,17918,18189,18412,18479,18607,18747,19042,19122,19384,19684,19878,20411,21454,21849,22088,26413,29810,52163,52822,53328,56637,66914,67943,68051,68585,70572,76936,101706,108155,192176,192197,217124,230908	Akt1,Ank3,Apc,Cacnb4,Camk4,Cct2,Cct3,Cct4,Cct5,Cct6a,Cct7,Cct8,Cdc42,Cdk5,Fyn,Gnai1,Hnrnpk,Hpca,Hsp90ab1,Jup,Kif3a,Lrp1,Msn,Mapt,Myo5a,Nrxn1,Sqstm1,Pak1,Pdpk1,Prkaca,Ppm1a,Prnp,Ran,Rdx,Rock2,Sorbs1,Tcp1,Trim28,Tsg101,Mapk1,Bag3,Camk1,Rufy3,Pgrmc1,Gsk3b,Vps28,Mesd,Nutf2,Rtn4,Ipo5,Hnrnpm,Numa1,Ogt,Flna,Bcas3,Ppp1r9b,Tardbp
3_Member	GO Biological Processes	GO:0070201	regulation of establishment of protein localization	-14.0934	-11.7043	99/740	11735,11785,11806,11816,11840,12326,12461,12462,12464,12465,12466,12468,12469,12540,12568,12652,12894,13033,13121,13211,13829,14161,14360,14567,14609,14645,14751,15107,15444,15502,15505,16480,16568,16971,17762,17975,18125,18189,18220,18479,18484,18642,18747,18754,18767,19042,19052,19055,19122,19247,19384,19387,20362,20614,21454,21849,22088,26413,26417,26950,29810,52163,52822,52906,54198,54525,546…	Ank3,Apbb1,Apoa1,Apoe,Arf1,Camk4,Cct2,Cct3,Cct4,Cct5,Cct6a,Cct7,Cct8,Cdc42,Cdk5,Chga,Cpt1a,Ctsd,Cyp51,Dhx9,Dmtn,Fga,Fyn,Gdi1,Gja1,Glul,Gpi1,Hadh,Hpca,Dnaja1,Hsph1,Jup,Kif3a,Lrp1,Mapt,Ncl,Nos1,Nrxn1,Nucb1,Pak1,Pam,Pfkm,Prkaca,Prkce,Pkia,Ppm1a,Ppp2ca,Ppp3ca,Prnp,Ptpn11,Ran,Rangap1,Sept8,Snap25,Tcp1,Trim28,Tsg101,Mapk1,Mapk3,Vsnl1,Bag3,Camk1,Rufy3,Ahi1,Snx3,Syt7,Gripap1,Cadm1,Snx12,Srcin1,Ensa,Chp1,…
3_Member	GO Biological Processes	GO:0051223	regulation of protein transport	-10.4128	-8.39592	87/708	11735,11785,11806,11816,11840,12326,12540,12568,12652,12894,13121,13211,13829,14161,14360,14567,14609,14645,14751,15107,15444,15502,16480,16568,16971,17975,18125,18189,18220,18479,18484,18642,18747,18754,18767,19042,19052,19055,19122,19247,19384,19387,20362,21849,22088,26413,26417,26950,29810,52163,52822,52906,54198,54525,54645,54725,55988,56013,56205,56398,56637,65114,66753,66914,67397,67738,680…	Ank3,Apbb1,Apoa1,Apoe,Arf1,Camk4,Cdc42,Cdk5,Chga,Cpt1a,Cyp51,Dhx9,Dmtn,Fga,Fyn,Gdi1,Gja1,Glul,Gpi1,Hadh,Hpca,Dnaja1,Jup,Kif3a,Lrp1,Ncl,Nos1,Nrxn1,Nucb1,Pak1,Pam,Pfkm,Prkaca,Prkce,Pkia,Ppm1a,Ppp2ca,Ppp3ca,Prnp,Ptpn11,Ran,Rangap1,Sept8,Trim28,Tsg101,Mapk1,Mapk3,Vsnl1,Bag3,Camk1,Rufy3,Ahi1,Snx3,Syt7,Gripap1,Cadm1,Snx12,Srcin1,Ensa,Chp1,Gsk3b,Vps35,Erlec1,Vps28,Erp29,Ppid,Nutf2,Ppm1f,Ipo5,Dnm1l,Oga,P…
3_Member	GO Biological Processes	GO:0090087	regulation of peptide transport	-9.86976	-7.89383	89/749	11735,11785,11806,11816,11840,12326,12540,12568,12652,12894,13121,13211,13829,14161,14360,14567,14609,14645,14751,15107,15444,15502,16480,16568,16971,17975,18125,18189,18220,18479,18484,18642,18747,18754,18767,19042,19052,19055,19122,19247,19384,19387,20362,21849,22088,26413,26417,26950,29810,52163,52822,52906,54126,54198,54393,54525,54645,54725,55988,56013,56205,56398,56637,65114,66753,66914,673…	Ank3,Apbb1,Apoa1,Apoe,Arf1,Camk4,Cdc42,Cdk5,Chga,Cpt1a,Cyp51,Dhx9,Dmtn,Fga,Fyn,Gdi1,Gja1,Glul,Gpi1,Hadh,Hpca,Dnaja1,Jup,Kif3a,Lrp1,Ncl,Nos1,Nrxn1,Nucb1,Pak1,Pam,Pfkm,Prkaca,Prkce,Pkia,Ppm1a,Ppp2ca,Ppp3ca,Prnp,Ptpn11,Ran,Rangap1,Sept8,Trim28,Tsg101,Mapk1,Mapk3,Vsnl1,Bag3,Camk1,Rufy3,Ahi1,Arhgef7,Snx3,Gabbr1,Syt7,Gripap1,Cadm1,Snx12,Srcin1,Ensa,Chp1,Gsk3b,Vps35,Erlec1,Vps28,Erp29,Ppid,Nutf2,Ppm1f,I…
3_Member	GO Biological Processes	GO:1904951	positive regulation of establishment of protein localization	-9.79515	-7.82379	63/454	11735,11785,11840,12326,12461,12462,12464,12465,12466,12468,12469,12540,12568,13211,14161,14360,14609,14645,14751,15444,16480,16568,16971,17975,18479,18642,18747,18754,19042,19122,19384,21454,21849,22088,26413,26417,26950,29810,52163,52822,54725,56398,56637,65114,66914,67738,68051,70572,74006,76055,76936,77579,78894,83397,99571,109689,110135,192176,192197,207227,230908,268860,360013	Ank3,Apbb1,Arf1,Camk4,Cct2,Cct3,Cct4,Cct5,Cct6a,Cct7,Cct8,Cdc42,Cdk5,Dhx9,Fga,Fyn,Gja1,Glul,Gpi1,Hpca,Jup,Kif3a,Lrp1,Ncl,Pak1,Pfkm,Prkaca,Prkce,Ppm1a,Prnp,Ran,Tcp1,Trim28,Tsg101,Mapk1,Mapk3,Vsnl1,Bag3,Camk1,Rufy3,Cadm1,Chp1,Gsk3b,Vps35,Vps28,Ppid,Nutf2,Ipo5,Dnm1l,Oga,Hnrnpm,Myh10,Aacs,Akap12,Fgg,Arrb1,Fgb,Flna,Bcas3,Stxbp5l,Tardbp,Abat,Myo18a
3_Member	GO Biological Processes	GO:0051222	positive regulation of protein transport	-7.20338	-5.43671	55/435	11735,11785,11840,12326,12540,12568,13211,14161,14360,14609,14645,14751,15444,16480,16568,16971,17975,18479,18642,18747,18754,19042,19122,19384,21849,22088,26413,26417,26950,29810,52163,52822,54725,56398,56637,65114,66914,67738,68051,70572,74006,76055,76936,77579,78894,83397,99571,109689,110135,192176,192197,207227,230908,268860,360013	Ank3,Apbb1,Arf1,Camk4,Cdc42,Cdk5,Dhx9,Fga,Fyn,Gja1,Glul,Gpi1,Hpca,Jup,Kif3a,Lrp1,Ncl,Pak1,Pfkm,Prkaca,Prkce,Ppm1a,Prnp,Ran,Trim28,Tsg101,Mapk1,Mapk3,Vsnl1,Bag3,Camk1,Rufy3,Cadm1,Chp1,Gsk3b,Vps35,Vps28,Ppid,Nutf2,Ipo5,Dnm1l,Oga,Hnrnpm,Myh10,Aacs,Akap12,Fgg,Arrb1,Fgb,Flna,Bcas3,Stxbp5l,Tardbp,Abat,Myo18a
4_Summary	GO Biological Processes	GO:0033365	protein localization to organelle	-24.9443	-21.537	125/774	11632,11651,11774,11776,11789,11843,12237,12298,12322,12461,12462,12464,12465,12466,12468,12469,12492,12568,12652,12876,13018,13175,13205,13207,13211,13660,14360,14645,14828,15481,15502,15505,15519,15525,16211,16480,16646,16648,16649,16784,17698,17762,17999,18164,18767,19052,19055,19058,19298,19338,19346,19349,19384,19386,19387,19684,19878,20255,20823,21402,21454,21849,21854,22088,22218,22608,226…	Aip,Akt1,Ap3b1,Ap3d1,Apc,Arf4,Bub3,Cacnb4,Camk2a,Cct2,Cct3,Cct4,Cct5,Cct6a,Cct7,Cct8,Scarb2,Cdk5,Chga,Cpe,Ctcf,Dclk1,Ddx3x,Ddx5,Dhx9,Ehd1,Fyn,Glul,Hspa5,Hspa8,Dnaja1,Hsph1,Hsp90aa1,Hspa4,Kpnb1,Jup,Kpna1,Kpna3,Kpna4,Lamp2,Msn,Mapt,Nedd4,Nptx1,Pkia,Ppp2ca,Ppp3ca,Ppp3r1,Pex19,Rab33b,Rab6a,Rab7,Ran,Ranbp2,Rangap1,Rdx,Rock2,Scg3,Ssb,Skp1a,Tcp1,Trim28,Timm17a,Tsg101,Sumo1,Ybx1,Ywhaz,Ik,Map2k1,Mapk1,Ubl…
4_Member	GO Biological Processes	GO:0033365	protein localization to organelle	-24.9443	-21.537	125/774	11632,11651,11774,11776,11789,11843,12237,12298,12322,12461,12462,12464,12465,12466,12468,12469,12492,12568,12652,12876,13018,13175,13205,13207,13211,13660,14360,14645,14828,15481,15502,15505,15519,15525,16211,16480,16646,16648,16649,16784,17698,17762,17999,18164,18767,19052,19055,19058,19298,19338,19346,19349,19384,19386,19387,19684,19878,20255,20823,21402,21454,21849,21854,22088,22218,22608,226…	Aip,Akt1,Ap3b1,Ap3d1,Apc,Arf4,Bub3,Cacnb4,Camk2a,Cct2,Cct3,Cct4,Cct5,Cct6a,Cct7,Cct8,Scarb2,Cdk5,Chga,Cpe,Ctcf,Dclk1,Ddx3x,Ddx5,Dhx9,Ehd1,Fyn,Glul,Hspa5,Hspa8,Dnaja1,Hsph1,Hsp90aa1,Hspa4,Kpnb1,Jup,Kpna1,Kpna3,Kpna4,Lamp2,Msn,Mapt,Nedd4,Nptx1,Pkia,Ppp2ca,Ppp3ca,Ppp3r1,Pex19,Rab33b,Rab6a,Rab7,Ran,Ranbp2,Rangap1,Rdx,Rock2,Scg3,Ssb,Skp1a,Tcp1,Trim28,Timm17a,Tsg101,Sumo1,Ybx1,Ywhaz,Ik,Map2k1,Mapk1,Ubl…
4_Member	GO Biological Processes	GO:0072594	establishment of protein localization to organelle	-13.0355	-10.7787	62/374	11632,11651,11774,11776,12461,12462,12464,12465,12466,12468,12469,12492,13207,14828,15481,15502,15505,15519,15525,16211,16480,16646,16648,16649,16784,17762,17999,18767,19052,19055,19058,19298,19349,19384,19386,21454,21849,21854,22088,22631,26413,29810,30055,52551,53612,56398,66661,66914,68051,70572,72993,75608,76582,98732,110750,192176,213990,226407,230908,233726,238799,242274	Aip,Akt1,Ap3b1,Ap3d1,Cct2,Cct3,Cct4,Cct5,Cct6a,Cct7,Cct8,Scarb2,Ddx5,Hspa5,Hspa8,Dnaja1,Hsph1,Hsp90aa1,Hspa4,Kpnb1,Jup,Kpna1,Kpna3,Kpna4,Lamp2,Mapt,Nedd4,Pkia,Ppp2ca,Ppp3ca,Ppp3r1,Pex19,Rab7,Ran,Ranbp2,Tcp1,Trim28,Timm17a,Tsg101,Ywhaz,Mapk1,Bag3,Timm13,Sgta,Vti1b,Chp1,Srp72,Vps28,Nutf2,Ipo5,Appl1,Chmp4b,Ipo11,Rab3gap2,Cse1l,Flna,Agap3,Rab3gap1,Tardbp,Ipo7,Tnpo1,Lrrc7
4_Member	GO Biological Processes	GO:0006913	nucleocytoplasmic transport	-11.8826	-9.76698	51/289	11651,11737,12326,12568,13207,13211,15481,15526,16211,16480,16646,16648,16649,18747,18767,19042,19047,19052,19055,19058,19247,19330,19384,19386,19387,20218,20823,21849,24015,26413,29810,52163,53817,56398,56637,66679,68051,69823,70572,71810,72993,73826,76582,110750,192176,213990,230908,233726,238799,276770,432508	Akt1,Anp32a,Camk4,Cdk5,Ddx5,Dhx9,Hspa8,Hspa9,Kpnb1,Jup,Kpna1,Kpna3,Kpna4,Prkaca,Pkia,Ppm1a,Ppp1cc,Ppp2ca,Ppp3ca,Ppp3r1,Ptpn11,Rab18,Ran,Ranbp2,Rangap1,Khdrbs1,Ssb,Trim28,Abce1,Mapk1,Bag3,Camk1,Ddx39b,Chp1,Gsk3b,Rae1,Nutf2,Fyttd1,Ipo5,Ranbp3,Appl1,Poldip3,Ipo11,Cse1l,Flna,Agap3,Tardbp,Ipo7,Tnpo1,Eif5a,Cpsf6
4_Member	GO Biological Processes	GO:0051169	nuclear transport	-11.8826	-9.76698	51/289	11651,11737,12326,12568,13207,13211,15481,15526,16211,16480,16646,16648,16649,18747,18767,19042,19047,19052,19055,19058,19247,19330,19384,19386,19387,20218,20823,21849,24015,26413,29810,52163,53817,56398,56637,66679,68051,69823,70572,71810,72993,73826,76582,110750,192176,213990,230908,233726,238799,276770,432508	Akt1,Anp32a,Camk4,Cdk5,Ddx5,Dhx9,Hspa8,Hspa9,Kpnb1,Jup,Kpna1,Kpna3,Kpna4,Prkaca,Pkia,Ppm1a,Ppp1cc,Ppp2ca,Ppp3ca,Ppp3r1,Ptpn11,Rab18,Ran,Ranbp2,Rangap1,Khdrbs1,Ssb,Trim28,Abce1,Mapk1,Bag3,Camk1,Ddx39b,Chp1,Gsk3b,Rae1,Nutf2,Fyttd1,Ipo5,Ranbp3,Appl1,Poldip3,Ipo11,Cse1l,Flna,Agap3,Tardbp,Ipo7,Tnpo1,Eif5a,Cpsf6
4_Member	GO Biological Processes	GO:0032388	positive regulation of intracellular transport	-11.8311	-9.71862	41/200	11735,11840,12306,12326,12540,12568,13211,13424,13660,14360,15444,16480,16568,17698,17756,18479,18747,19042,19122,19384,19684,20218,20280,21849,26413,29810,52163,52822,54525,56637,68051,69017,70572,71732,74006,101706,192176,192197,216344,230908,432508	Ank3,Arf1,Anxa2,Camk4,Cdc42,Cdk5,Dhx9,Dync1h1,Ehd1,Fyn,Hpca,Jup,Kif3a,Msn,Map2,Pak1,Prkaca,Ppm1a,Prnp,Ran,Rdx,Khdrbs1,Scp2,Trim28,Mapk1,Bag3,Camk1,Rufy3,Syt7,Gsk3b,Nutf2,Prrt2,Ipo5,Vps11,Dnm1l,Numa1,Flna,Bcas3,Rab21,Tardbp,Cpsf6
4_Member	GO Biological Processes	GO:0034504	protein localization to nucleus	-10.1288	-8.13171	46/272	11651,12298,12568,13175,13207,14360,14645,15481,16211,16480,16646,16648,16649,18767,19052,19055,19058,19384,19386,19387,21402,21849,22218,26413,29810,51810,56327,56398,56637,64009,67025,68051,70572,70762,72993,76582,76936,94275,108155,110355,110750,192176,213990,230908,233726,238799	Akt1,Cacnb4,Cdk5,Dclk1,Ddx5,Fyn,Glul,Hspa8,Kpnb1,Jup,Kpna1,Kpna3,Kpna4,Pkia,Ppp2ca,Ppp3ca,Ppp3r1,Ran,Ranbp2,Rangap1,Skp1a,Trim28,Sumo1,Mapk1,Bag3,Hnrnpu,Arl2,Chp1,Gsk3b,Syne1,Rpl11,Nutf2,Ipo5,Dclk2,Appl1,Ipo11,Hnrnpm,Maged1,Ogt,Grk2,Cse1l,Flna,Agap3,Tardbp,Ipo7,Tnpo1
4_Member	GO Biological Processes	GO:0033157	regulation of intracellular protein transport	-9.34215	-7.39511	38/210	11735,12326,12540,12568,13829,14360,14567,15444,16480,16568,18220,18479,18747,18767,19042,19052,19122,19247,19384,19387,20362,21849,26413,29810,52163,52822,54198,54645,56398,56637,66753,68051,70572,108155,192176,192197,216831,230908	Ank3,Camk4,Cdc42,Cdk5,Dmtn,Fyn,Gdi1,Hpca,Jup,Kif3a,Nucb1,Pak1,Prkaca,Pkia,Ppm1a,Ppp2ca,Prnp,Ptpn11,Ran,Rangap1,Sept8,Trim28,Mapk1,Bag3,Camk1,Rufy3,Snx3,Gripap1,Chp1,Gsk3b,Erlec1,Nutf2,Ipo5,Ogt,Flna,Bcas3,Arhgap44,Tardbp
4_Member	GO Biological Processes	GO:0017038	protein import	-8.28831	-6.41613	36/209	11651,11816,12759,13207,15481,15519,15525,16211,16480,16646,16648,16649,18767,19052,19055,19058,19298,19384,19386,21849,21854,26413,29810,30055,56398,68051,70572,72993,76582,76936,110750,192176,213990,230908,233726,238799	Akt1,Apoe,Clu,Ddx5,Hspa8,Hsp90aa1,Hspa4,Kpnb1,Jup,Kpna1,Kpna3,Kpna4,Pkia,Ppp2ca,Ppp3ca,Ppp3r1,Pex19,Ran,Ranbp2,Trim28,Timm17a,Mapk1,Bag3,Timm13,Chp1,Nutf2,Ipo5,Appl1,Ipo11,Hnrnpm,Cse1l,Flna,Agap3,Tardbp,Ipo7,Tnpo1
4_Member	GO Biological Processes	GO:0051170	import into nucleus	-7.62165	-5.81642	29/155	11651,13207,15481,16211,16480,16646,16648,16649,18767,19052,19055,19058,19330,19384,19386,21849,26413,29810,56398,68051,70572,72993,76582,110750,192176,213990,230908,233726,238799	Akt1,Ddx5,Hspa8,Kpnb1,Jup,Kpna1,Kpna3,Kpna4,Pkia,Ppp2ca,Ppp3ca,Ppp3r1,Rab18,Ran,Ranbp2,Trim28,Mapk1,Bag3,Chp1,Nutf2,Ipo5,Appl1,Ipo11,Cse1l,Flna,Agap3,Tardbp,Ipo7,Tnpo1
4_Member	GO Biological Processes	GO:0046822	regulation of nucleocytoplasmic transport	-7.5943	-5.7937	24/112	12326,12568,13211,16480,18747,18767,19042,19047,19052,19247,19384,19387,20218,21849,26413,29810,52163,56398,56637,68051,70572,192176,230908,432508	Camk4,Cdk5,Dhx9,Jup,Prkaca,Pkia,Ppm1a,Ppp1cc,Ppp2ca,Ptpn11,Ran,Rangap1,Khdrbs1,Trim28,Mapk1,Bag3,Camk1,Chp1,Gsk3b,Nutf2,Ipo5,Flna,Tardbp,Cpsf6
4_Member	GO Biological Processes	GO:0006606	protein import into nucleus	-7.29501	-5.51829	28/151	11651,13207,15481,16211,16480,16646,16648,16649,18767,19052,19055,19058,19384,19386,21849,26413,29810,56398,68051,70572,72993,76582,110750,192176,213990,230908,233726,238799	Akt1,Ddx5,Hspa8,Kpnb1,Jup,Kpna1,Kpna3,Kpna4,Pkia,Ppp2ca,Ppp3ca,Ppp3r1,Ran,Ranbp2,Trim28,Mapk1,Bag3,Chp1,Nutf2,Ipo5,Appl1,Ipo11,Cse1l,Flna,Agap3,Tardbp,Ipo7,Tnpo1
4_Member	GO Biological Processes	GO:0046824	positive regulation of nucleocytoplasmic transport	-6.99433	-5.24436	17/64	12326,13211,16480,18747,19042,19384,20218,21849,26413,29810,52163,56637,68051,70572,192176,230908,432508	Camk4,Dhx9,Jup,Prkaca,Ppm1a,Ran,Khdrbs1,Trim28,Mapk1,Bag3,Camk1,Gsk3b,Nutf2,Ipo5,Flna,Tardbp,Cpsf6
4_Member	GO Biological Processes	GO:0090316	positive regulation of intracellular protein transport	-6.24736	-4.59703	24/131	11735,12326,12540,12568,14360,15444,16480,16568,18479,18747,19042,19122,19384,21849,26413,29810,52163,52822,56637,68051,70572,192176,192197,230908	Ank3,Camk4,Cdc42,Cdk5,Fyn,Hpca,Jup,Kif3a,Pak1,Prkaca,Ppm1a,Prnp,Ran,Trim28,Mapk1,Bag3,Camk1,Rufy3,Gsk3b,Nutf2,Ipo5,Flna,Bcas3,Tardbp
4_Member	GO Biological Processes	GO:1900180	regulation of protein localization to nucleus	-5.72342	-4.14681	22/121	11651,12298,13175,14360,14645,16480,18767,19052,19384,21849,26413,29810,56398,56637,68051,70572,70762,76936,94275,108155,192176,230908	Akt1,Cacnb4,Dclk1,Fyn,Glul,Jup,Pkia,Ppp2ca,Ran,Trim28,Mapk1,Bag3,Chp1,Gsk3b,Nutf2,Ipo5,Dclk2,Hnrnpm,Maged1,Ogt,Flna,Tardbp
4_Member	GO Biological Processes	GO:1900182	positive regulation of protein localization to nucleus	-3.99351	-2.61849	14/75	11651,12298,14360,16480,19384,21849,26413,29810,68051,70572,76936,108155,192176,230908	Akt1,Cacnb4,Fyn,Jup,Ran,Trim28,Mapk1,Bag3,Nutf2,Ipo5,Hnrnpm,Ogt,Flna,Tardbp
4_Member	GO Biological Processes	GO:1904589	regulation of protein import	-3.79205	-2.44545	13/69	16480,18767,19052,19384,21849,26413,29810,56398,68051,70572,76936,192176,230908	Jup,Pkia,Ppp2ca,Ran,Trim28,Mapk1,Bag3,Chp1,Nutf2,Ipo5,Hnrnpm,Flna,Tardbp
4_Member	GO Biological Processes	GO:0042306	regulation of protein import into nucleus	-3.52375	-2.22172	12/64	16480,18767,19052,19384,21849,26413,29810,56398,68051,70572,192176,230908	Jup,Pkia,Ppp2ca,Ran,Trim28,Mapk1,Bag3,Chp1,Nutf2,Ipo5,Flna,Tardbp
4_Member	GO Biological Processes	GO:1904591	positive regulation of protein import	-3.40865	-2.12846	10/48	16480,19384,21849,26413,29810,68051,70572,76936,192176,230908	Jup,Ran,Trim28,Mapk1,Bag3,Nutf2,Ipo5,Hnrnpm,Flna,Tardbp
4_Member	GO Biological Processes	GO:0042307	positive regulation of protein import into nucleus	-3.13631	-1.90157	9/43	16480,19384,21849,26413,29810,68051,70572,192176,230908	Jup,Ran,Trim28,Mapk1,Bag3,Nutf2,Ipo5,Flna,Tardbp
5_Summary	GO Biological Processes	GO:0016358	dendrite development	-23.7536	-20.4416	70/294	11308,11816,11820,11840,11843,11848,12322,12323,12386,12540,12568,12704,13169,13175,13196,13690,13838,14265,14360,14810,14815,14824,15182,15387,15452,15572,16202,17755,17756,17920,17999,18212,18222,18472,18479,18483,19055,19878,22629,23969,26419,50932,52163,53872,53972,56013,56637,64009,71974,73178,74006,76089,76454,77480,83814,103967,108100,216344,216831,216963,217124,218194,223254,224105,227541…	Abi1,Apoe,App,Arf1,Arf4,Rhoa,Camk2a,Camk2b,Ctnna2,Cdc42,Cdk5,Cit,Dbnl,Dclk1,Asap1,Eif4g2,Epha4,Fmr1,Fyn,Grin1,Nr3c1,Grn,Hdac2,Hnrnpk,Hprt,Elavl4,Ilk,Map1b,Map2,Myo6,Nedd4,Ntrk2,Numb,Pafah1b1,Pak1,Palm,Ppp3ca,Rock2,Ywhah,Pacsin1,Mapk8,Mink1,Camk1,Caprin1,Ngef,Srcin1,Gsk3b,Syne1,Prmt3,Wasl,Dnm1l,Rapgef2,Fbxo31,Kidins220,Nedd4l,Dnm3,Baiap2,Rab21,Arhgap44,Git1,Ppp1r9b,Phactr1,Farp1,Pak2,Camk1d,Ppp1r9…
5_Member	GO Biological Processes	GO:0016358	dendrite development	-23.7536	-20.4416	70/294	11308,11816,11820,11840,11843,11848,12322,12323,12386,12540,12568,12704,13169,13175,13196,13690,13838,14265,14360,14810,14815,14824,15182,15387,15452,15572,16202,17755,17756,17920,17999,18212,18222,18472,18479,18483,19055,19878,22629,23969,26419,50932,52163,53872,53972,56013,56637,64009,71974,73178,74006,76089,76454,77480,83814,103967,108100,216344,216831,216963,217124,218194,223254,224105,227541…	Abi1,Apoe,App,Arf1,Arf4,Rhoa,Camk2a,Camk2b,Ctnna2,Cdc42,Cdk5,Cit,Dbnl,Dclk1,Asap1,Eif4g2,Epha4,Fmr1,Fyn,Grin1,Nr3c1,Grn,Hdac2,Hnrnpk,Hprt,Elavl4,Ilk,Map1b,Map2,Myo6,Nedd4,Ntrk2,Numb,Pafah1b1,Pak1,Palm,Ppp3ca,Rock2,Ywhah,Pacsin1,Mapk8,Mink1,Camk1,Caprin1,Ngef,Srcin1,Gsk3b,Syne1,Prmt3,Wasl,Dnm1l,Rapgef2,Fbxo31,Kidins220,Nedd4l,Dnm3,Baiap2,Rab21,Arhgap44,Git1,Ppp1r9b,Phactr1,Farp1,Pak2,Camk1d,Ppp1r9…
5_Member	GO Biological Processes	GO:0048858	cell projection morphogenesis	-20.1514	-17.1777	108/696	11308,11658,11735,11785,11789,11816,11820,12215,12322,12323,12386,12387,12540,12552,12568,12704,12759,12891,13169,13175,13518,13690,13800,13823,13838,14265,14360,14457,14567,14609,14790,14810,15387,15452,15516,15519,15572,16202,16210,16568,16574,16728,16765,16971,17755,17756,17762,17999,18164,18212,18222,18472,18479,19055,19247,19339,19878,20239,20981,22223,22239,22629,23789,23969,26395,26419,298…	Abi1,Alcam,Ank3,Apbb1,Apc,Apoe,App,Bsg,Camk2a,Camk2b,Ctnna2,Ctnnb1,Cdc42,Cdh11,Cdk5,Cit,Clu,Cpne6,Dbnl,Dclk1,Dst,Eif4g2,Enah,Epb41l3,Epha4,Fmr1,Fyn,Gas7,Gdi1,Gja1,Grcc10,Grin1,Hnrnpk,Hprt,Hsp90ab1,Hsp90aa1,Elavl4,Ilk,Impact,Kif3a,Kif5c,L1cam,Stmn1,Lrp1,Map1b,Map2,Mapt,Nedd4,Nptx1,Ntrk2,Numb,Pafah1b1,Pak1,Ppp3ca,Ptpn11,Rab3a,Rock2,Atxn2,Syt3,Uchl1,Ugt8a,Ywhah,Coro1b,Pacsin1,Map2k1,Mapk8,Cspg5,Mink…
5_Member	GO Biological Processes	GO:0032990	cell part morphogenesis	-20.0837	-17.1324	110/718	11308,11658,11735,11785,11789,11816,11820,12215,12322,12323,12386,12387,12540,12552,12568,12704,12759,12891,13169,13175,13518,13690,13800,13823,13838,14265,14360,14457,14567,14609,14790,14810,15387,15452,15516,15519,15572,16202,16210,16568,16574,16728,16765,16971,17755,17756,17762,17999,18164,18212,18222,18472,18479,19055,19247,19339,19878,20239,20981,22223,22239,22629,23789,23969,26395,26419,298…	Abi1,Alcam,Ank3,Apbb1,Apc,Apoe,App,Bsg,Camk2a,Camk2b,Ctnna2,Ctnnb1,Cdc42,Cdh11,Cdk5,Cit,Clu,Cpne6,Dbnl,Dclk1,Dst,Eif4g2,Enah,Epb41l3,Epha4,Fmr1,Fyn,Gas7,Gdi1,Gja1,Grcc10,Grin1,Hnrnpk,Hprt,Hsp90ab1,Hsp90aa1,Elavl4,Ilk,Impact,Kif3a,Kif5c,L1cam,Stmn1,Lrp1,Map1b,Map2,Mapt,Nedd4,Nptx1,Ntrk2,Numb,Pafah1b1,Pak1,Ppp3ca,Ptpn11,Rab3a,Rock2,Atxn2,Syt3,Uchl1,Ugt8a,Ywhah,Coro1b,Pacsin1,Map2k1,Mapk8,Cspg5,Mink…
5_Member	GO Biological Processes	GO:0120039	plasma membrane bounded cell projection morphogenesis	-19.8945	-16.9644	107/691	11308,11658,11735,11785,11789,11816,11820,12215,12322,12323,12386,12387,12540,12552,12568,12704,12759,12891,13169,13175,13518,13690,13800,13823,13838,14265,14360,14457,14567,14609,14790,14810,15387,15452,15516,15519,15572,16202,16210,16568,16574,16728,16765,16971,17755,17756,17762,17999,18164,18212,18222,18472,18479,19055,19247,19339,19878,20239,20981,22223,22239,22629,23789,23969,26395,26419,509…	Abi1,Alcam,Ank3,Apbb1,Apc,Apoe,App,Bsg,Camk2a,Camk2b,Ctnna2,Ctnnb1,Cdc42,Cdh11,Cdk5,Cit,Clu,Cpne6,Dbnl,Dclk1,Dst,Eif4g2,Enah,Epb41l3,Epha4,Fmr1,Fyn,Gas7,Gdi1,Gja1,Grcc10,Grin1,Hnrnpk,Hprt,Hsp90ab1,Hsp90aa1,Elavl4,Ilk,Impact,Kif3a,Kif5c,L1cam,Stmn1,Lrp1,Map1b,Map2,Mapt,Nedd4,Nptx1,Ntrk2,Numb,Pafah1b1,Pak1,Ppp3ca,Ptpn11,Rab3a,Rock2,Atxn2,Syt3,Uchl1,Ugt8a,Ywhah,Coro1b,Pacsin1,Map2k1,Mapk8,Mink1,Rufy…
5_Member	GO Biological Processes	GO:0048812	neuron projection morphogenesis	-19.5765	-16.6858	105/677	11308,11658,11735,11785,11789,11816,11820,12215,12322,12323,12386,12387,12540,12552,12568,12704,12759,12891,13169,13175,13518,13690,13800,13823,13838,14265,14360,14457,14567,14609,14790,14810,15387,15452,15516,15519,15572,16202,16210,16568,16574,16728,16765,16971,17755,17756,17762,17999,18164,18212,18222,18472,18479,19055,19247,19339,19878,20239,20981,22223,22239,22629,23969,26395,26419,50932,528…	Abi1,Alcam,Ank3,Apbb1,Apc,Apoe,App,Bsg,Camk2a,Camk2b,Ctnna2,Ctnnb1,Cdc42,Cdh11,Cdk5,Cit,Clu,Cpne6,Dbnl,Dclk1,Dst,Eif4g2,Enah,Epb41l3,Epha4,Fmr1,Fyn,Gas7,Gdi1,Gja1,Grcc10,Grin1,Hnrnpk,Hprt,Hsp90ab1,Hsp90aa1,Elavl4,Ilk,Impact,Kif3a,Kif5c,L1cam,Stmn1,Lrp1,Map1b,Map2,Mapt,Nedd4,Nptx1,Ntrk2,Numb,Pafah1b1,Pak1,Ppp3ca,Ptpn11,Rab3a,Rock2,Atxn2,Syt3,Uchl1,Ugt8a,Ywhah,Pacsin1,Map2k1,Mapk8,Mink1,Rufy3,Capri…
5_Member	GO Biological Processes	GO:0031344	regulation of cell projection organization	-17.7272	-14.9717	111/781	11651,11785,11789,11816,11840,11848,11881,12323,12386,12492,12540,12568,12704,12891,13169,13196,13627,13660,13690,13829,13838,14265,14360,14567,14810,14812,14815,14824,14828,15182,15387,15507,15519,15572,16202,16438,16728,16852,16971,17755,17756,17758,17762,17999,18189,18212,18222,18472,18479,18483,18643,19055,19122,19229,19230,19317,19385,19684,20614,20720,20981,21770,22629,23789,23969,26395,521…	Akt1,Apbb1,Apc,Apoe,Arf1,Rhoa,Arsb,Camk2b,Ctnna2,Scarb2,Cdc42,Cdk5,Cit,Cpne6,Dbnl,Asap1,Eef1a1,Ehd1,Eif4g2,Dmtn,Epha4,Fmr1,Fyn,Gdi1,Grin1,Grin2b,Nr3c1,Grn,Hspa5,Hdac2,Hnrnpk,Hspb1,Hsp90aa1,Elavl4,Ilk,Itpr1,L1cam,Lgals1,Lrp1,Map1b,Map2,Map4,Mapt,Nedd4,Nrxn1,Ntrk2,Numb,Pafah1b1,Pak1,Palm,Pfn1,Ppp3ca,Prnp,Ptk2b,Twf1,Qk,Ranbp1,Rdx,Snap25,Serpine2,Syt3,Ppp2r5d,Ywhah,Coro1b,Pacsin1,Map2k1,Camk1,Rufy3,A…
5_Member	GO Biological Processes	GO:0120035	regulation of plasma membrane bounded cell projection organization	-17.651	-14.9172	110/772	11651,11785,11789,11816,11840,11848,11881,12323,12386,12492,12540,12568,12704,12891,13169,13196,13627,13660,13690,13829,13838,14265,14360,14567,14810,14812,14815,14824,14828,15182,15387,15507,15519,15572,16202,16438,16728,16852,16971,17755,17756,17758,17762,17999,18189,18212,18222,18472,18479,18483,18643,19055,19122,19229,19230,19317,19385,19684,20614,20720,20981,21770,22629,23789,23969,26395,521…	Akt1,Apbb1,Apc,Apoe,Arf1,Rhoa,Arsb,Camk2b,Ctnna2,Scarb2,Cdc42,Cdk5,Cit,Cpne6,Dbnl,Asap1,Eef1a1,Ehd1,Eif4g2,Dmtn,Epha4,Fmr1,Fyn,Gdi1,Grin1,Grin2b,Nr3c1,Grn,Hspa5,Hdac2,Hnrnpk,Hspb1,Hsp90aa1,Elavl4,Ilk,Itpr1,L1cam,Lgals1,Lrp1,Map1b,Map2,Map4,Mapt,Nedd4,Nrxn1,Ntrk2,Numb,Pafah1b1,Pak1,Palm,Pfn1,Ppp3ca,Prnp,Ptk2b,Twf1,Qk,Ranbp1,Rdx,Snap25,Serpine2,Syt3,Ppp2r5d,Ywhah,Coro1b,Pacsin1,Map2k1,Camk1,Rufy3,A…
5_Member	GO Biological Processes	GO:0048813	dendrite morphogenesis	-17.2924	-14.5714	46/178	11308,12322,12323,12386,12540,12568,12704,13169,13175,13838,14265,14360,14810,15452,15572,16202,17999,18222,18472,19055,19878,22629,26419,50932,53872,53972,56013,56637,64009,71974,73178,74006,76089,76454,77480,83814,103967,108100,216344,216831,218194,223254,243725,381921,382253,665113	Abi1,Camk2a,Camk2b,Ctnna2,Cdc42,Cdk5,Cit,Dbnl,Dclk1,Epha4,Fmr1,Fyn,Grin1,Hprt,Elavl4,Ilk,Nedd4,Numb,Pafah1b1,Ppp3ca,Rock2,Ywhah,Mapk8,Mink1,Caprin1,Ngef,Srcin1,Gsk3b,Syne1,Prmt3,Wasl,Dnm1l,Rapgef2,Fbxo31,Kidins220,Nedd4l,Dnm3,Baiap2,Rab21,Arhgap44,Phactr1,Farp1,Ppp1r9a,Taok2,Cdkl5,Tnik
5_Member	GO Biological Processes	GO:0010975	regulation of neuron projection development	-17.1945	-14.4862	93/603	11651,11785,11816,11840,11848,11881,12323,12386,12492,12568,12704,12891,13169,13196,13627,13660,13690,13838,14265,14360,14567,14810,14815,14824,14828,15182,15387,15507,15572,16202,16438,16728,16852,16971,17755,17756,17762,17999,18212,18222,18472,18479,18483,19055,19229,19230,19317,19385,20614,20720,20981,21770,22629,23969,26395,52163,52822,52906,53872,53972,54198,56013,56637,59041,64009,68585,706…	Akt1,Apbb1,Apoe,Arf1,Rhoa,Arsb,Camk2b,Ctnna2,Scarb2,Cdk5,Cit,Cpne6,Dbnl,Asap1,Eef1a1,Ehd1,Eif4g2,Epha4,Fmr1,Fyn,Gdi1,Grin1,Nr3c1,Grn,Hspa5,Hdac2,Hnrnpk,Hspb1,Elavl4,Ilk,Itpr1,L1cam,Lgals1,Lrp1,Map1b,Map2,Mapt,Nedd4,Ntrk2,Numb,Pafah1b1,Pak1,Palm,Ppp3ca,Ptk2b,Twf1,Qk,Ranbp1,Snap25,Serpine2,Syt3,Ppp2r5d,Ywhah,Pacsin1,Map2k1,Camk1,Rufy3,Ahi1,Caprin1,Ngef,Snx3,Srcin1,Gsk3b,Stk25,Syne1,Rtn4,Ube2v2,Dnm1…
5_Member	GO Biological Processes	GO:0010976	positive regulation of neuron projection development	-16.5227	-13.8831	67/362	11785,11816,11840,11881,12323,12492,12891,13169,13627,13660,13690,13838,14265,14360,14567,14815,14824,14828,15387,15507,15572,16202,16438,16728,16971,17755,17762,18212,18222,18472,18479,18483,19229,19230,19317,19385,20720,20981,21770,23969,26395,52163,52822,52906,53872,54198,56637,59041,68585,70620,74006,76089,76454,77480,80987,83814,108100,216344,216739,223255,227541,232906,234593,240058,242274,…	Apbb1,Apoe,Arf1,Arsb,Camk2b,Scarb2,Cpne6,Dbnl,Eef1a1,Ehd1,Eif4g2,Epha4,Fmr1,Fyn,Gdi1,Nr3c1,Grn,Hspa5,Hnrnpk,Hspb1,Elavl4,Ilk,Itpr1,L1cam,Lrp1,Map1b,Mapt,Ntrk2,Numb,Pafah1b1,Pak1,Palm,Ptk2b,Twf1,Qk,Ranbp1,Serpine2,Syt3,Ppp2r5d,Pacsin1,Map2k1,Camk1,Rufy3,Ahi1,Caprin1,Snx3,Gsk3b,Stk25,Rtn4,Ube2v2,Dnm1l,Rapgef2,Fbxo31,Kidins220,Nckipsd,Nedd4l,Baiap2,Rab21,Acsl6,Stk24,Camk1d,Arhgap35,Ndrg4,Cpne5,Lrrc7…
5_Member	GO Biological Processes	GO:0031346	positive regulation of cell projection organization	-15.9878	-13.3886	77/466	11785,11789,11816,11840,11881,12323,12492,12540,12891,13169,13627,13660,13690,13838,14265,14360,14567,14810,14815,14824,14828,15387,15507,15519,15572,16202,16438,16728,16971,17755,17762,18212,18222,18472,18479,18483,18643,19229,19230,19317,19385,20720,20981,21770,23789,23969,26395,52163,52822,52906,53872,54198,56637,59041,68585,70620,73178,74006,76089,76454,77480,80987,83814,101314,103967,108100,…	Apbb1,Apc,Apoe,Arf1,Arsb,Camk2b,Scarb2,Cdc42,Cpne6,Dbnl,Eef1a1,Ehd1,Eif4g2,Epha4,Fmr1,Fyn,Gdi1,Grin1,Nr3c1,Grn,Hspa5,Hnrnpk,Hspb1,Hsp90aa1,Elavl4,Ilk,Itpr1,L1cam,Lrp1,Map1b,Mapt,Ntrk2,Numb,Pafah1b1,Pak1,Palm,Pfn1,Ptk2b,Twf1,Qk,Ranbp1,Serpine2,Syt3,Ppp2r5d,Coro1b,Pacsin1,Map2k1,Camk1,Rufy3,Ahi1,Caprin1,Snx3,Gsk3b,Stk25,Rtn4,Ube2v2,Wasl,Dnm1l,Rapgef2,Fbxo31,Kidins220,Nckipsd,Nedd4l,Brk1,Dnm3,Baiap2…
5_Member	GO Biological Processes	GO:0022604	regulation of cell morphogenesis	-15.1244	-12.6429	81/523	11674,11750,11806,11816,11848,11852,12323,12540,12568,12704,12891,13169,13690,13823,13829,13838,14265,14360,14457,14567,14810,15212,15387,16202,16568,16728,16971,17698,17755,17756,17762,17886,17999,18212,18222,18472,18479,18483,19055,19229,19684,20981,22629,23789,23837,26395,29873,52822,53872,53972,56013,56637,59041,60595,64009,67938,68585,71960,74006,76089,76454,76499,77579,77767,83814,103967,10…	Aldoa,Anxa7,Apoa1,Apoe,Rhoa,Rhob,Camk2b,Cdc42,Cdk5,Cit,Cpne6,Dbnl,Eif4g2,Epb41l3,Dmtn,Epha4,Fmr1,Fyn,Gas7,Gdi1,Grin1,Hexb,Hnrnpk,Ilk,Kif3a,L1cam,Lrp1,Msn,Map1b,Map2,Mapt,Myh9,Nedd4,Ntrk2,Numb,Pafah1b1,Pak1,Palm,Ppp3ca,Ptk2b,Rdx,Syt3,Ywhah,Coro1b,Cfdp1,Map2k1,Cspg5,Rufy3,Caprin1,Ngef,Srcin1,Gsk3b,Stk25,Actn4,Syne1,Myl12b,Rtn4,Myh14,Dnm1l,Rapgef2,Fbxo31,Clasp2,Myh10,Ermn,Nedd4l,Dnm3,Baiap2,Rcc2,Fln…
5_Member	GO Biological Processes	GO:0048667	cell morphogenesis involved in neuron differentiation	-15.094	-12.6218	91/628	11308,11658,11735,11785,11789,11816,11820,12215,12322,12323,12386,12540,12552,12568,12704,13169,13175,13518,13690,13800,13838,14265,14360,14567,14790,14810,15452,15516,15519,15572,16202,16568,16574,16728,16765,16971,17755,17756,17762,17999,18164,18212,18222,18472,18479,19055,19247,19339,19878,22223,22629,26395,26419,50932,52822,53872,53972,56013,56637,59041,64009,68193,68585,71974,73178,73991,740…	Abi1,Alcam,Ank3,Apbb1,Apc,Apoe,App,Bsg,Camk2a,Camk2b,Ctnna2,Cdc42,Cdh11,Cdk5,Cit,Dbnl,Dclk1,Dst,Eif4g2,Enah,Epha4,Fmr1,Fyn,Gdi1,Grcc10,Grin1,Hprt,Hsp90ab1,Hsp90aa1,Elavl4,Ilk,Kif3a,Kif5c,L1cam,Stmn1,Lrp1,Map1b,Map2,Mapt,Nedd4,Nptx1,Ntrk2,Numb,Pafah1b1,Pak1,Ppp3ca,Ptpn11,Rab3a,Rock2,Uchl1,Ywhah,Map2k1,Mapk8,Mink1,Rufy3,Caprin1,Ngef,Srcin1,Gsk3b,Stk25,Syne1,Rpl24,Rtn4,Prmt3,Wasl,Atl1,Dnm1l,Rapgef2,…
5_Member	GO Biological Processes	GO:0050773	regulation of dendrite development	-14.5708	-12.138	44/191	11816,11840,11848,12323,12568,12704,13169,13196,13690,13838,14265,14810,14815,14824,15182,15387,15572,16202,17999,18212,18222,18472,18483,19055,22629,23969,52163,53872,53972,56013,56637,64009,74006,76089,76454,83814,103967,108100,216344,216831,227541,243725,382253,665113	Apoe,Arf1,Rhoa,Camk2b,Cdk5,Cit,Dbnl,Asap1,Eif4g2,Epha4,Fmr1,Grin1,Nr3c1,Grn,Hdac2,Hnrnpk,Elavl4,Ilk,Nedd4,Ntrk2,Numb,Pafah1b1,Palm,Ppp3ca,Ywhah,Pacsin1,Camk1,Caprin1,Ngef,Srcin1,Gsk3b,Syne1,Dnm1l,Rapgef2,Fbxo31,Nedd4l,Dnm3,Baiap2,Rab21,Arhgap44,Camk1d,Ppp1r9a,Cdkl5,Tnik
5_Member	GO Biological Processes	GO:0045664	regulation of neuron differentiation	-14.007	-11.6297	102/776	11651,11785,11816,11820,11840,11848,11881,12323,12386,12492,12568,12704,12891,13169,13196,13209,13627,13660,13684,13690,13838,14265,14360,14567,14810,14815,14824,14828,15182,15387,15507,15572,16202,16210,16438,16728,16852,16971,17755,17756,17762,17999,18212,18222,18472,18479,18483,19055,19229,19230,19317,19385,20614,20720,20981,21770,22628,22629,23969,26395,26419,28000,52163,52822,52906,53872,539…	Akt1,Apbb1,Apoe,App,Arf1,Rhoa,Arsb,Camk2b,Ctnna2,Scarb2,Cdk5,Cit,Cpne6,Dbnl,Asap1,Ddx6,Eef1a1,Ehd1,Eif4e,Eif4g2,Epha4,Fmr1,Fyn,Gdi1,Grin1,Nr3c1,Grn,Hspa5,Hdac2,Hnrnpk,Hspb1,Elavl4,Ilk,Impact,Itpr1,L1cam,Lgals1,Lrp1,Map1b,Map2,Mapt,Nedd4,Ntrk2,Numb,Pafah1b1,Pak1,Palm,Ppp3ca,Ptk2b,Twf1,Qk,Ranbp1,Snap25,Serpine2,Syt3,Ppp2r5d,Ywhag,Ywhah,Pacsin1,Map2k1,Mapk8,Prpf19,Camk1,Rufy3,Ahi1,Caprin1,Ngef,Snx3,…
5_Member	GO Biological Processes	GO:0045666	positive regulation of neuron differentiation	-13.6827	-11.3388	72/461	11785,11816,11840,11848,11881,12323,12492,12891,13169,13627,13660,13690,13838,14265,14360,14567,14815,14824,14828,15387,15507,15572,16202,16210,16438,16728,16971,17755,17762,18212,18222,18472,18479,18483,19229,19230,19317,19385,20720,20981,21770,23969,26395,28000,52163,52822,52906,53872,54198,56637,59041,68585,69807,70620,74006,76089,76454,77480,80987,83814,108100,208643,216344,216739,223255,2275…	Apbb1,Apoe,Arf1,Rhoa,Arsb,Camk2b,Scarb2,Cpne6,Dbnl,Eef1a1,Ehd1,Eif4g2,Epha4,Fmr1,Fyn,Gdi1,Nr3c1,Grn,Hspa5,Hnrnpk,Hspb1,Elavl4,Ilk,Impact,Itpr1,L1cam,Lrp1,Map1b,Mapt,Ntrk2,Numb,Pafah1b1,Pak1,Palm,Ptk2b,Twf1,Qk,Ranbp1,Serpine2,Syt3,Ppp2r5d,Pacsin1,Map2k1,Prpf19,Camk1,Rufy3,Ahi1,Caprin1,Snx3,Gsk3b,Stk25,Rtn4,Trim32,Ube2v2,Dnm1l,Rapgef2,Fbxo31,Kidins220,Nckipsd,Nedd4l,Baiap2,Eif4g1,Rab21,Acsl6,Stk24,…
5_Member	GO Biological Processes	GO:0050769	positive regulation of neurogenesis	-13.0392	-10.7787	82/580	11785,11816,11840,11848,11881,12323,12387,12492,12891,13169,13627,13660,13690,13838,14265,14360,14567,14810,14815,14824,14828,15182,15387,15507,15572,16202,16210,16438,16728,16971,17755,17762,18212,18222,18472,18479,18483,19047,19229,19230,19317,19385,19744,20720,20981,21770,22041,23969,26395,26419,28000,51886,52163,52822,52906,53872,54198,56637,59041,68585,69807,70620,74006,76089,76454,77480,809…	Apbb1,Apoe,Arf1,Rhoa,Arsb,Camk2b,Ctnnb1,Scarb2,Cpne6,Dbnl,Eef1a1,Ehd1,Eif4g2,Epha4,Fmr1,Fyn,Gdi1,Grin1,Nr3c1,Grn,Hspa5,Hdac2,Hnrnpk,Hspb1,Elavl4,Ilk,Impact,Itpr1,L1cam,Lrp1,Map1b,Mapt,Ntrk2,Numb,Pafah1b1,Pak1,Palm,Ppp1cc,Ptk2b,Twf1,Qk,Ranbp1,Rheb,Serpine2,Syt3,Ppp2r5d,Trf,Pacsin1,Map2k1,Mapk8,Prpf19,Fubp1,Camk1,Rufy3,Ahi1,Caprin1,Snx3,Gsk3b,Stk25,Rtn4,Trim32,Ube2v2,Dnm1l,Rapgef2,Fbxo31,Kidins220,…
5_Member	GO Biological Processes	GO:0010720	positive regulation of cell development	-12.5186	-10.3269	88/659	11785,11806,11816,11840,11848,11881,12323,12387,12492,12891,13169,13627,13660,13690,13829,13838,14265,14360,14567,14810,14815,14824,14828,15182,15387,15507,15572,16202,16210,16438,16728,16971,17755,17762,18212,18222,18472,18479,18483,18671,19047,19229,19230,19317,19385,19744,20720,20981,21770,22041,23969,26395,26419,28000,29873,51886,52163,52822,52906,53817,53872,54198,54411,56637,59041,68585,698…	Apbb1,Apoa1,Apoe,Arf1,Rhoa,Arsb,Camk2b,Ctnnb1,Scarb2,Cpne6,Dbnl,Eef1a1,Ehd1,Eif4g2,Dmtn,Epha4,Fmr1,Fyn,Gdi1,Grin1,Nr3c1,Grn,Hspa5,Hdac2,Hnrnpk,Hspb1,Elavl4,Ilk,Impact,Itpr1,L1cam,Lrp1,Map1b,Mapt,Ntrk2,Numb,Pafah1b1,Pak1,Palm,Abcb1a,Ppp1cc,Ptk2b,Twf1,Qk,Ranbp1,Rheb,Serpine2,Syt3,Ppp2r5d,Trf,Pacsin1,Map2k1,Mapk8,Prpf19,Cspg5,Fubp1,Camk1,Rufy3,Ahi1,Ddx39b,Caprin1,Snx3,Atp6ap1,Gsk3b,Stk25,Rtn4,Trim32…
5_Member	GO Biological Processes	GO:0051962	positive regulation of nervous system development	-11.1687	-9.0866	84/651	11785,11816,11840,11848,11881,12323,12387,12492,12891,13169,13627,13660,13690,13838,14265,14360,14567,14810,14815,14824,14828,15182,15387,15507,15572,16202,16210,16438,16728,16971,17755,17762,18189,18212,18222,18472,18479,18483,19047,19229,19230,19317,19385,19744,20720,20981,21770,22041,23969,26395,26419,28000,51886,52163,52822,52906,53872,54198,56637,59041,68585,69807,70620,74006,76089,76454,774…	Apbb1,Apoe,Arf1,Rhoa,Arsb,Camk2b,Ctnnb1,Scarb2,Cpne6,Dbnl,Eef1a1,Ehd1,Eif4g2,Epha4,Fmr1,Fyn,Gdi1,Grin1,Nr3c1,Grn,Hspa5,Hdac2,Hnrnpk,Hspb1,Elavl4,Ilk,Impact,Itpr1,L1cam,Lrp1,Map1b,Mapt,Nrxn1,Ntrk2,Numb,Pafah1b1,Pak1,Palm,Ppp1cc,Ptk2b,Twf1,Qk,Ranbp1,Rheb,Serpine2,Syt3,Ppp2r5d,Trf,Pacsin1,Map2k1,Mapk8,Prpf19,Fubp1,Camk1,Rufy3,Ahi1,Caprin1,Snx3,Gsk3b,Stk25,Rtn4,Trim32,Ube2v2,Dnm1l,Rapgef2,Fbxo31,Kidi…
5_Member	GO Biological Processes	GO:0048814	regulation of dendrite morphogenesis	-10.9608	-8.89877	29/114	12323,12568,12704,13169,13838,14265,14810,16202,17999,18222,18472,19055,22629,53872,53972,56013,56637,64009,74006,76089,76454,83814,103967,108100,216344,216831,243725,382253,665113	Camk2b,Cdk5,Cit,Dbnl,Epha4,Fmr1,Grin1,Ilk,Nedd4,Numb,Pafah1b1,Ppp3ca,Ywhah,Caprin1,Ngef,Srcin1,Gsk3b,Syne1,Dnm1l,Rapgef2,Fbxo31,Nedd4l,Dnm3,Baiap2,Rab21,Arhgap44,Ppp1r9a,Cdkl5,Tnik
5_Member	GO Biological Processes	GO:0010769	regulation of cell morphogenesis involved in differentiation	-9.56067	-7.60054	52/343	11806,11816,12323,12568,12704,13169,13690,13829,13838,14265,14567,14810,16202,16728,16971,17755,17756,17762,17999,18212,18222,18472,18479,19055,22629,26395,29873,52822,53872,53972,56013,56637,59041,60595,64009,68585,74006,76089,76454,76499,83814,103967,108100,108911,192176,216344,216831,232906,243725,272381,382253,665113	Apoa1,Apoe,Camk2b,Cdk5,Cit,Dbnl,Eif4g2,Dmtn,Epha4,Fmr1,Gdi1,Grin1,Ilk,L1cam,Lrp1,Map1b,Map2,Mapt,Nedd4,Ntrk2,Numb,Pafah1b1,Pak1,Ppp3ca,Ywhah,Map2k1,Cspg5,Rufy3,Caprin1,Ngef,Srcin1,Gsk3b,Stk25,Actn4,Syne1,Rtn4,Dnm1l,Rapgef2,Fbxo31,Clasp2,Nedd4l,Dnm3,Baiap2,Rcc2,Flna,Rab21,Arhgap44,Arhgap35,Ppp1r9a,Lrrc4b,Cdkl5,Tnik
5_Member	GO Biological Processes	GO:0061564	axon development	-7.12894	-5.36791	61/507	11658,11735,11785,11789,11806,11816,11820,12215,12386,12552,12568,13169,13175,13518,13690,13800,13838,14567,14790,14810,14824,15516,15519,16202,16568,16574,16728,16765,16971,17755,17756,17762,18164,18212,18222,18472,18479,19247,19339,22223,26395,52822,56637,59041,68193,68585,69807,73991,76499,76884,77579,80297,216344,223255,226251,229791,232906,272381,319504,381921,382253	Alcam,Ank3,Apbb1,Apc,Apoa1,Apoe,App,Bsg,Ctnna2,Cdh11,Cdk5,Dbnl,Dclk1,Dst,Eif4g2,Enah,Epha4,Gdi1,Grcc10,Grin1,Grn,Hsp90ab1,Hsp90aa1,Ilk,Kif3a,Kif5c,L1cam,Stmn1,Lrp1,Map1b,Map2,Mapt,Nptx1,Ntrk2,Numb,Pafah1b1,Pak1,Ptpn11,Rab3a,Uchl1,Map2k1,Rufy3,Gsk3b,Stk25,Rpl24,Rtn4,Trim32,Atl1,Clasp2,Cyfip2,Myh10,Sptbn4,Rab21,Stk24,Ablim1,Plppr4,Arhgap35,Lrrc4b,Nrcam,Taok2,Cdkl5
5_Member	GO Biological Processes	GO:0016049	cell growth	-6.94594	-5.20543	61/513	11625,11651,11785,11816,11820,11848,12387,12568,12576,12891,12955,12995,13169,13175,13205,13690,13823,14199,14489,14567,14609,14815,15193,15387,15516,15519,16202,16210,16728,16971,17755,17756,17762,18472,18479,19063,19229,20720,20981,22088,26398,51886,52822,53817,54725,56637,66508,68585,69807,76499,76884,83767,83814,208643,216344,217124,219158,234214,240058,245688,382253	Ahsg,Akt1,Apbb1,Apoe,App,Rhoa,Ctnnb1,Cdk5,Cdkn1b,Cpne6,Cryab,Csnk2a1,Dbnl,Dclk1,Ddx3x,Eif4g2,Epb41l3,Fhl1,Mtpn,Gdi1,Gja1,Nr3c1,Hdgfl2,Hnrnpk,Hsp90ab1,Hsp90aa1,Ilk,Impact,L1cam,Lrp1,Map1b,Map2,Mapt,Pafah1b1,Pak1,Ppt1,Ptk2b,Serpine2,Syt3,Tsg101,Map2k4,Fubp1,Rufy3,Ddx39b,Cadm1,Gsk3b,Lamtor1,Rtn4,Trim32,Clasp2,Cyfip2,Wasf1,Nedd4l,Eif4g1,Rab21,Ppp1r9b,Ccar2,Sorbs2,Cpne5,Rbbp7,Cdkl5
5_Member	GO Biological Processes	GO:0007409	axonogenesis	-6.81804	-5.10221	57/470	11658,11735,11785,11789,11816,11820,12215,12386,12552,12568,13169,13175,13518,13690,13800,13838,14567,14790,14810,15516,15519,16202,16568,16574,16728,16765,16971,17755,17756,17762,18164,18212,18222,18472,18479,19247,19339,22223,26395,52822,56637,59041,68193,68585,73991,76499,76884,77579,80297,216344,226251,229791,232906,272381,319504,381921,382253	Alcam,Ank3,Apbb1,Apc,Apoe,App,Bsg,Ctnna2,Cdh11,Cdk5,Dbnl,Dclk1,Dst,Eif4g2,Enah,Epha4,Gdi1,Grcc10,Grin1,Hsp90ab1,Hsp90aa1,Ilk,Kif3a,Kif5c,L1cam,Stmn1,Lrp1,Map1b,Map2,Mapt,Nptx1,Ntrk2,Numb,Pafah1b1,Pak1,Ptpn11,Rab3a,Uchl1,Map2k1,Rufy3,Gsk3b,Stk25,Rpl24,Rtn4,Atl1,Clasp2,Cyfip2,Myh10,Sptbn4,Rab21,Ablim1,Plppr4,Arhgap35,Lrrc4b,Nrcam,Taok2,Cdkl5
5_Member	GO Biological Processes	GO:1990138	neuron projection extension	-6.47363	-4.79643	31/194	11816,12387,12568,12891,13169,13175,13690,14567,15387,15516,15519,16202,16210,16728,16971,17755,17756,17762,18472,18479,20981,52822,56637,68585,76499,76884,83767,83814,216344,240058,382253	Apoe,Ctnnb1,Cdk5,Cpne6,Dbnl,Dclk1,Eif4g2,Gdi1,Hnrnpk,Hsp90ab1,Hsp90aa1,Ilk,Impact,L1cam,Lrp1,Map1b,Map2,Mapt,Pafah1b1,Pak1,Syt3,Rufy3,Gsk3b,Rtn4,Clasp2,Cyfip2,Wasf1,Nedd4l,Rab21,Cpne5,Cdkl5
5_Member	GO Biological Processes	GO:0010770	positive regulation of cell morphogenesis involved in differentiation	-6.42708	-4.75561	30/185	11806,11816,12323,13169,13690,13829,13838,14567,16202,16728,16971,17755,17762,18212,18222,18472,18479,26395,29873,52822,53872,56637,59041,68585,74006,76454,108100,192176,216344,382253	Apoa1,Apoe,Camk2b,Dbnl,Eif4g2,Dmtn,Epha4,Gdi1,Ilk,L1cam,Lrp1,Map1b,Mapt,Ntrk2,Numb,Pafah1b1,Pak1,Map2k1,Cspg5,Rufy3,Caprin1,Gsk3b,Stk25,Rtn4,Dnm1l,Fbxo31,Baiap2,Flna,Rab21,Cdkl5
5_Member	GO Biological Processes	GO:0030307	positive regulation of cell growth	-6.42306	-4.75273	31/195	11651,11816,11848,12891,12995,13169,13205,13690,14489,14567,14815,15193,15387,16202,16728,16971,17755,17762,18472,18479,19229,20981,52822,53817,56637,68585,69807,83814,208643,240058,382253	Akt1,Apoe,Rhoa,Cpne6,Csnk2a1,Dbnl,Ddx3x,Eif4g2,Mtpn,Gdi1,Nr3c1,Hdgfl2,Hnrnpk,Ilk,L1cam,Lrp1,Map1b,Mapt,Pafah1b1,Pak1,Ptk2b,Syt3,Rufy3,Ddx39b,Gsk3b,Rtn4,Trim32,Nedd4l,Eif4g1,Cpne5,Cdkl5
5_Member	GO Biological Processes	GO:0048588	developmental cell growth	-6.28643	-4.63174	37/260	11816,11820,12387,12568,12891,13169,13175,13690,14567,14815,15387,15516,15519,16202,16210,16728,16971,17755,17756,17762,18472,18479,20981,26398,51886,52822,53817,56637,68585,76499,76884,83767,83814,216344,234214,240058,382253	Apoe,App,Ctnnb1,Cdk5,Cpne6,Dbnl,Dclk1,Eif4g2,Gdi1,Nr3c1,Hnrnpk,Hsp90ab1,Hsp90aa1,Ilk,Impact,L1cam,Lrp1,Map1b,Map2,Mapt,Pafah1b1,Pak1,Syt3,Map2k4,Fubp1,Rufy3,Ddx39b,Gsk3b,Rtn4,Clasp2,Cyfip2,Wasf1,Nedd4l,Rab21,Sorbs2,Cpne5,Cdkl5
5_Member	GO Biological Processes	GO:0045773	positive regulation of axon extension	-5.52574	-3.96414	14/56	11816,13169,13690,14567,16202,16728,16971,17755,17762,18472,18479,52822,56637,382253	Apoe,Dbnl,Eif4g2,Gdi1,Ilk,L1cam,Lrp1,Map1b,Mapt,Pafah1b1,Pak1,Rufy3,Gsk3b,Cdkl5
5_Member	GO Biological Processes	GO:0008361	regulation of cell size	-5.2971	-3.76569	30/209	11651,11750,11816,11848,12568,12729,13169,13690,14489,14567,15516,15519,16202,16728,16971,17755,17756,17762,18472,18479,19684,52822,56637,68576,68585,76499,108155,216344,380711,382253	Akt1,Anxa7,Apoe,Rhoa,Cdk5,Clns1a,Dbnl,Eif4g2,Mtpn,Gdi1,Hsp90ab1,Hsp90aa1,Ilk,L1cam,Lrp1,Map1b,Map2,Mapt,Pafah1b1,Pak1,Rdx,Rufy3,Gsk3b,Lamtor5,Rtn4,Clasp2,Ogt,Rab21,Rap1gap2,Cdkl5
5_Member	GO Biological Processes	GO:0001558	regulation of cell growth	-5.15525	-3.64084	49/431	11625,11651,11785,11816,11848,12568,12576,12891,12955,12995,13169,13205,13690,13823,14199,14489,14567,14609,14815,15193,15387,16202,16728,16971,17755,17756,17762,18472,18479,19063,19229,20720,20981,22088,52822,53817,56637,66508,68585,69807,76499,83814,208643,216344,217124,219158,240058,245688,382253	Ahsg,Akt1,Apbb1,Apoe,Rhoa,Cdk5,Cdkn1b,Cpne6,Cryab,Csnk2a1,Dbnl,Ddx3x,Eif4g2,Epb41l3,Fhl1,Mtpn,Gdi1,Gja1,Nr3c1,Hdgfl2,Hnrnpk,Ilk,L1cam,Lrp1,Map1b,Map2,Mapt,Pafah1b1,Pak1,Ppt1,Ptk2b,Serpine2,Syt3,Tsg101,Rufy3,Ddx39b,Gsk3b,Lamtor1,Rtn4,Trim32,Clasp2,Nedd4l,Eif4g1,Rab21,Ppp1r9b,Ccar2,Cpne5,Rbbp7,Cdkl5
5_Member	GO Biological Processes	GO:0045927	positive regulation of growth	-4.9267	-3.43623	38/308	11651,11816,11848,12891,12995,13169,13205,13690,14489,14567,14815,15193,15387,16202,16728,16971,17755,17762,17938,18472,18479,19035,19229,20981,22393,26413,52822,52906,53817,56637,68585,68606,69807,80297,83814,208643,240058,382253	Akt1,Apoe,Rhoa,Cpne6,Csnk2a1,Dbnl,Ddx3x,Eif4g2,Mtpn,Gdi1,Nr3c1,Hdgfl2,Hnrnpk,Ilk,L1cam,Lrp1,Map1b,Mapt,Naca,Pafah1b1,Pak1,Ppib,Ptk2b,Syt3,Wfs1,Mapk1,Rufy3,Ahi1,Ddx39b,Gsk3b,Rtn4,Ppm1f,Trim32,Sptbn4,Nedd4l,Eif4g1,Cpne5,Cdkl5
5_Member	GO Biological Processes	GO:0048675	axon extension	-4.76601	-3.30178	22/138	11816,12568,13169,13175,13690,14567,15516,15519,16202,16728,16971,17755,17756,17762,18472,18479,52822,56637,68585,76499,216344,382253	Apoe,Cdk5,Dbnl,Dclk1,Eif4g2,Gdi1,Hsp90ab1,Hsp90aa1,Ilk,L1cam,Lrp1,Map1b,Map2,Mapt,Pafah1b1,Pak1,Rufy3,Gsk3b,Rtn4,Clasp2,Rab21,Cdkl5
5_Member	GO Biological Processes	GO:0060560	developmental growth involved in morphogenesis	-4.65998	-3.21105	34/270	11816,11820,12387,12568,12891,13169,13175,13690,14567,15387,15516,15519,16202,16210,16728,16971,17755,17756,17762,18472,18479,20981,21849,52822,54725,56637,68585,76499,76884,83767,83814,216344,240058,382253	Apoe,App,Ctnnb1,Cdk5,Cpne6,Dbnl,Dclk1,Eif4g2,Gdi1,Hnrnpk,Hsp90ab1,Hsp90aa1,Ilk,Impact,L1cam,Lrp1,Map1b,Map2,Mapt,Pafah1b1,Pak1,Syt3,Trim28,Rufy3,Cadm1,Gsk3b,Rtn4,Clasp2,Cyfip2,Wasf1,Nedd4l,Rab21,Cpne5,Cdkl5
5_Member	GO Biological Processes	GO:0050772	positive regulation of axonogenesis	-4.61448	-3.17233	18/102	11816,13169,13690,14567,16202,16728,16971,17755,17762,18212,18472,18479,26395,52822,56637,59041,68585,382253	Apoe,Dbnl,Eif4g2,Gdi1,Ilk,L1cam,Lrp1,Map1b,Mapt,Ntrk2,Pafah1b1,Pak1,Map2k1,Rufy3,Gsk3b,Stk25,Rtn4,Cdkl5
5_Member	GO Biological Processes	GO:0030516	regulation of axon extension	-4.52956	-3.0954	19/113	11816,12568,13169,13690,14567,16202,16728,16971,17755,17756,17762,18472,18479,52822,56637,68585,76499,216344,382253	Apoe,Cdk5,Dbnl,Eif4g2,Gdi1,Ilk,L1cam,Lrp1,Map1b,Map2,Mapt,Pafah1b1,Pak1,Rufy3,Gsk3b,Rtn4,Clasp2,Rab21,Cdkl5
5_Member	GO Biological Processes	GO:0040008	regulation of growth	-4.21392	-2.81353	68/717	11625,11651,11785,11789,11816,11820,11848,12568,12576,12891,12955,12995,13169,13205,13690,13823,14199,14489,14567,14609,14683,14815,15182,15193,15387,16202,16728,16971,17755,17756,17762,17938,18472,18479,18751,18984,19035,19063,19229,20239,20720,20981,21881,22088,22393,26413,29873,52822,52906,53817,56505,56637,66508,68585,68606,69807,76499,80297,83814,102247,208643,216344,217124,219158,224105,240…	Ahsg,Akt1,Apbb1,Apc,Apoe,App,Rhoa,Cdk5,Cdkn1b,Cpne6,Cryab,Csnk2a1,Dbnl,Ddx3x,Eif4g2,Epb41l3,Fhl1,Mtpn,Gdi1,Gja1,Gnas,Nr3c1,Hdac2,Hdgfl2,Hnrnpk,Ilk,L1cam,Lrp1,Map1b,Map2,Mapt,Naca,Pafah1b1,Pak1,Prkcb,Por,Ppib,Ppt1,Ptk2b,Atxn2,Serpine2,Syt3,Tkt,Tsg101,Wfs1,Mapk1,Cspg5,Rufy3,Ahi1,Ddx39b,Ruvbl1,Gsk3b,Lamtor1,Rtn4,Ppm1f,Trim32,Clasp2,Sptbn4,Nedd4l,Gpat4,Eif4g1,Rab21,Ppp1r9b,Ccar2,Pak2,Cpne5,Rbbp7,Cdkl5
5_Member	GO Biological Processes	GO:0048639	positive regulation of developmental growth	-3.84413	-2.4866	27/214	11651,11816,12891,13169,13690,14567,14815,15387,16202,16728,16971,17755,17762,17938,18472,18479,19035,20981,26413,52822,53817,56637,68585,80297,83814,240058,382253	Akt1,Apoe,Cpne6,Dbnl,Eif4g2,Gdi1,Nr3c1,Hnrnpk,Ilk,L1cam,Lrp1,Map1b,Mapt,Naca,Pafah1b1,Pak1,Ppib,Syt3,Mapk1,Rufy3,Ddx39b,Gsk3b,Rtn4,Sptbn4,Nedd4l,Cpne5,Cdkl5
5_Member	GO Biological Processes	GO:0061387	regulation of extent of cell growth	-3.82258	-2.46946	19/127	11816,12568,13169,13690,14567,16202,16728,16971,17755,17756,17762,18472,18479,52822,56637,68585,76499,216344,382253	Apoe,Cdk5,Dbnl,Eif4g2,Gdi1,Ilk,L1cam,Lrp1,Map1b,Map2,Mapt,Pafah1b1,Pak1,Rufy3,Gsk3b,Rtn4,Clasp2,Rab21,Cdkl5
5_Member	GO Biological Processes	GO:0050770	regulation of axonogenesis	-3.76141	-2.41697	26/205	11816,12568,13169,13690,13838,14567,14810,16202,16728,16971,17755,17756,17762,18212,18472,18479,26395,52822,56637,59041,68585,76499,216344,232906,272381,382253	Apoe,Cdk5,Dbnl,Eif4g2,Epha4,Gdi1,Grin1,Ilk,L1cam,Lrp1,Map1b,Map2,Mapt,Ntrk2,Pafah1b1,Pak1,Map2k1,Rufy3,Gsk3b,Stk25,Rtn4,Clasp2,Rab21,Arhgap35,Lrrc4b,Cdkl5
5_Member	GO Biological Processes	GO:0048638	regulation of developmental growth	-3.13406	-1.90157	40/401	11651,11789,11816,11820,12568,12576,12891,13169,13690,14567,14609,14683,14815,15182,15387,16202,16728,16971,17755,17756,17762,17938,18472,18479,18984,19035,20239,20981,26413,52822,53817,56637,68585,76499,80297,83814,102247,216344,240058,382253	Akt1,Apc,Apoe,App,Cdk5,Cdkn1b,Cpne6,Dbnl,Eif4g2,Gdi1,Gja1,Gnas,Nr3c1,Hdac2,Hnrnpk,Ilk,L1cam,Lrp1,Map1b,Map2,Mapt,Naca,Pafah1b1,Pak1,Por,Ppib,Atxn2,Syt3,Mapk1,Rufy3,Ddx39b,Gsk3b,Rtn4,Clasp2,Sptbn4,Nedd4l,Gpat4,Rab21,Cpne5,Cdkl5
5_Member	GO Biological Processes	GO:0048589	developmental growth	-2.86456	-1.67475	67/787	11651,11784,11789,11816,11820,12306,12387,12527,12568,12576,12891,13169,13175,13690,14232,14567,14571,14609,14683,14815,15182,15387,15516,15519,16202,16210,16728,16971,17755,17756,17762,17938,18472,18479,18746,18984,19035,19084,19156,19247,20239,20981,21849,22384,26398,26413,28000,29876,51886,52822,53817,54725,56637,67561,68585,70661,76499,76884,80297,83767,83814,94229,102247,216344,234214,240058…	Akt1,Apba2,Apc,Apoe,App,Anxa2,Ctnnb1,Cd9,Cdk5,Cdkn1b,Cpne6,Dbnl,Dclk1,Eif4g2,Fkbp8,Gdi1,Gpd2,Gja1,Gnas,Nr3c1,Hdac2,Hnrnpk,Hsp90ab1,Hsp90aa1,Ilk,Impact,L1cam,Lrp1,Map1b,Map2,Mapt,Naca,Pafah1b1,Pak1,Pkm,Por,Ppib,Prkar1a,Psap,Ptpn11,Atxn2,Syt3,Trim28,Eif4h,Map2k4,Mapk1,Prpf19,Clic4,Fubp1,Rufy3,Ddx39b,Cadm1,Gsk3b,Wdr48,Rtn4,Sik3,Clasp2,Cyfip2,Sptbn4,Wasf1,Nedd4l,Slc4a10,Gpat4,Rab21,Sorbs2,Cpne5,Cdkl5
6_Summary	GO Biological Processes	GO:0044257	cellular protein catabolic process	-23.5167	-20.2643	119/741	11651,11816,12306,12334,12387,12759,12995,13030,13039,13194,13838,14265,14479,14828,15516,15519,16784,16971,17463,17698,17999,18002,18521,18571,18747,18752,19053,19063,19166,19170,19172,19175,19184,19185,19188,19229,19349,19359,19684,20316,20479,21402,21762,22027,22088,22123,22210,22218,22223,22224,22230,22258,22393,23997,26419,26440,26441,26442,26444,26554,26572,28000,52551,54473,54609,56207,564…	Akt1,Apoe,Anxa2,Capn2,Ctnnb1,Clu,Csnk2a1,Ctsb,Ctsl,Ddb1,Epha4,Fmr1,Usp15,Hspa5,Hsp90ab1,Hsp90aa1,Lamp2,Lrp1,Psmd7,Msn,Nedd4,Nedd8,Pcbp2,Pdcd6ip,Prkaca,Prkcg,Ppp2cb,Ppt1,Psma2,Psmb1,Psmb4,Psmb6,Psmc5,Psmd4,Psme2,Ptk2b,Rab7,Rad23b,Rdx,Sdf2,Vps4b,Skp1a,Psmd2,Hsp90b1,Tsg101,Psmd3,Ube2b,Sumo1,Uchl1,Usp10,Ufd1,Usp4,Wfs1,Psmd13,Mapk8,Psma1,Psma4,Psma5,Psma7,Cul3,Cops3,Prpf19,Sgta,Tollip,Ubqln2,Uchl5,Stu…
6_Member	GO Biological Processes	GO:0044257	cellular protein catabolic process	-23.5167	-20.2643	119/741	11651,11816,12306,12334,12387,12759,12995,13030,13039,13194,13838,14265,14479,14828,15516,15519,16784,16971,17463,17698,17999,18002,18521,18571,18747,18752,19053,19063,19166,19170,19172,19175,19184,19185,19188,19229,19349,19359,19684,20316,20479,21402,21762,22027,22088,22123,22210,22218,22223,22224,22230,22258,22393,23997,26419,26440,26441,26442,26444,26554,26572,28000,52551,54473,54609,56207,564…	Akt1,Apoe,Anxa2,Capn2,Ctnnb1,Clu,Csnk2a1,Ctsb,Ctsl,Ddb1,Epha4,Fmr1,Usp15,Hspa5,Hsp90ab1,Hsp90aa1,Lamp2,Lrp1,Psmd7,Msn,Nedd4,Nedd8,Pcbp2,Pdcd6ip,Prkaca,Prkcg,Ppp2cb,Ppt1,Psma2,Psmb1,Psmb4,Psmb6,Psmc5,Psmd4,Psme2,Ptk2b,Rab7,Rad23b,Rdx,Sdf2,Vps4b,Skp1a,Psmd2,Hsp90b1,Tsg101,Psmd3,Ube2b,Sumo1,Uchl1,Usp10,Ufd1,Usp4,Wfs1,Psmd13,Mapk8,Psma1,Psma4,Psma5,Psma7,Cul3,Cops3,Prpf19,Sgta,Tollip,Ubqln2,Uchl5,Stu…
6_Member	GO Biological Processes	GO:0051603	proteolysis involved in cellular protein catabolic process	-20.6057	-17.6086	109/697	11651,11816,12334,12387,12759,12995,13030,13039,13194,13838,14265,14479,14828,15516,17463,17999,18002,18521,18571,18747,18752,19053,19166,19170,19172,19175,19184,19185,19188,19229,19359,20316,20479,21402,21762,22027,22088,22123,22210,22218,22223,22224,22230,22258,22393,23997,26419,26440,26441,26442,26444,26554,26572,28000,52551,54473,54609,56207,56424,56637,56736,57296,58799,59007,59025,59029,639…	Akt1,Apoe,Capn2,Ctnnb1,Clu,Csnk2a1,Ctsb,Ctsl,Ddb1,Epha4,Fmr1,Usp15,Hspa5,Hsp90ab1,Psmd7,Nedd4,Nedd8,Pcbp2,Pdcd6ip,Prkaca,Prkcg,Ppp2cb,Psma2,Psmb1,Psmb4,Psmb6,Psmc5,Psmd4,Psme2,Ptk2b,Rad23b,Sdf2,Vps4b,Skp1a,Psmd2,Hsp90b1,Tsg101,Psmd3,Ube2b,Sumo1,Uchl1,Usp10,Ufd1,Usp4,Wfs1,Psmd13,Mapk8,Psma1,Psma4,Psma5,Psma7,Cul3,Cops3,Prpf19,Sgta,Tollip,Ubqln2,Uchl5,Stub1,Gsk3b,Rnf14,Psmd8,Crbn,Ngly1,Usp14,Psmd14…
6_Member	KEGG Pathway	mmu03050	Proteasome	-18.5815	-15.7605	25/46	17463,19166,19170,19172,19175,19179,19182,19184,19185,19188,21762,22123,23996,23997,26440,26441,26442,26444,57296,59029,66413,66997,67089,69077,70247	Psmd7,Psma2,Psmb1,Psmb4,Psmb6,Psmc1,Psmc3,Psmc5,Psmd4,Psme2,Psmd2,Psmd3,Psmc4,Psmd13,Psma1,Psma4,Psma5,Psma7,Psmd8,Psmd14,Psmd6,Psmd12,Psmc6,Psmd11,Psmd1
6_Member	GO Biological Processes	GO:0019941	modification-dependent protein catabolic process	-17.1341	-14.438	92/594	11651,12387,12759,12995,13194,14479,14828,15516,17463,17999,18002,18521,19053,19166,19170,19172,19175,19184,19185,19229,19359,20479,21402,21762,22027,22088,22123,22210,22218,22223,22224,22230,22258,22393,23997,26419,26440,26441,26442,26444,26554,26572,52551,54473,54609,56207,56424,56637,56736,57296,58799,59025,59029,63958,65019,66105,66413,66753,66861,66881,66914,66997,67025,67089,67812,67923,690…	Akt1,Ctnnb1,Clu,Csnk2a1,Ddb1,Usp15,Hspa5,Hsp90ab1,Psmd7,Nedd4,Nedd8,Pcbp2,Ppp2cb,Psma2,Psmb1,Psmb4,Psmb6,Psmc5,Psmd4,Ptk2b,Rad23b,Vps4b,Skp1a,Psmd2,Hsp90b1,Tsg101,Psmd3,Ube2b,Sumo1,Uchl1,Usp10,Ufd1,Usp4,Wfs1,Psmd13,Mapk8,Psma1,Psma4,Psma5,Psma7,Cul3,Cops3,Sgta,Tollip,Ubqln2,Uchl5,Stub1,Gsk3b,Rnf14,Psmd8,Crbn,Usp14,Psmd14,Ube4b,Rpl23,Ube2d3,Psmd6,Erlec1,Dnajc10,Pcyox1,Vps28,Psmd12,Rpl11,Psmc6,Ubxn…
6_Member	GO Biological Processes	GO:0043632	modification-dependent macromolecule catabolic process	-16.6555	-13.9941	92/604	11651,12387,12759,12995,13194,14479,14828,15516,17463,17999,18002,18521,19053,19166,19170,19172,19175,19184,19185,19229,19359,20479,21402,21762,22027,22088,22123,22210,22218,22223,22224,22230,22258,22393,23997,26419,26440,26441,26442,26444,26554,26572,52551,54473,54609,56207,56424,56637,56736,57296,58799,59025,59029,63958,65019,66105,66413,66753,66861,66881,66914,66997,67025,67089,67812,67923,690…	Akt1,Ctnnb1,Clu,Csnk2a1,Ddb1,Usp15,Hspa5,Hsp90ab1,Psmd7,Nedd4,Nedd8,Pcbp2,Ppp2cb,Psma2,Psmb1,Psmb4,Psmb6,Psmc5,Psmd4,Ptk2b,Rad23b,Vps4b,Skp1a,Psmd2,Hsp90b1,Tsg101,Psmd3,Ube2b,Sumo1,Uchl1,Usp10,Ufd1,Usp4,Wfs1,Psmd13,Mapk8,Psma1,Psma4,Psma5,Psma7,Cul3,Cops3,Sgta,Tollip,Ubqln2,Uchl5,Stub1,Gsk3b,Rnf14,Psmd8,Crbn,Usp14,Psmd14,Ube4b,Rpl23,Ube2d3,Psmd6,Erlec1,Dnajc10,Pcyox1,Vps28,Psmd12,Rpl11,Psmc6,Ubxn…
6_Member	Reactome Gene Sets	R-MMU-68827	CDT1 association with the CDC6:ORC:origin complex	-16.5902	-13.9399	26/58	17463,19166,19170,19172,19175,19179,19182,19184,19185,19188,21762,22123,23996,23997,26440,26441,26442,26444,57296,59029,66413,66997,67089,69077,70247,78294	Psmd7,Psma2,Psmb1,Psmb4,Psmb6,Psmc1,Psmc3,Psmc5,Psmd4,Psme2,Psmd2,Psmd3,Psmc4,Psmd13,Psma1,Psma4,Psma5,Psma7,Psmd8,Psmd14,Psmd6,Psmd12,Psmc6,Psmd11,Psmd1,Rps27a
6_Member	GO Biological Processes	GO:0010498	proteasomal protein catabolic process	-15.8367	-13.2919	76/459	11651,11816,12387,12759,13194,14265,14828,15516,17463,17999,18521,18747,18752,19053,19166,19170,19172,19175,19184,19185,19188,19359,20316,21402,21762,22027,22210,22218,22230,22393,26419,26440,26441,26442,26444,26554,28000,52551,54609,56207,56424,56637,56736,57296,58799,59025,59029,63958,66105,66413,66530,66753,66861,66997,67025,67089,67812,70247,70620,71472,71745,76454,76577,80890,83814,93687,937…	Akt1,Apoe,Ctnnb1,Clu,Ddb1,Fmr1,Hspa5,Hsp90ab1,Psmd7,Nedd4,Pcbp2,Prkaca,Prkcg,Ppp2cb,Psma2,Psmb1,Psmb4,Psmb6,Psmc5,Psmd4,Psme2,Rad23b,Sdf2,Skp1a,Psmd2,Hsp90b1,Ube2b,Sumo1,Ufd1,Wfs1,Mapk8,Psma1,Psma4,Psma5,Psma7,Cul3,Prpf19,Sgta,Ubqln2,Uchl5,Stub1,Gsk3b,Rnf14,Psmd8,Crbn,Usp14,Psmd14,Ube4b,Ube2d3,Psmd6,Ubxn6,Erlec1,Dnajc10,Psmd12,Rpl11,Psmc6,Ubxn4,Psmd1,Ube2v2,Usp19,Cul2,Fbxo31,Faf2,Trim2,Nedd4l,Csn…
6_Member	GO Biological Processes	GO:0006511	ubiquitin-dependent protein catabolic process	-15.7445	-13.2164	88/582	11651,12387,12759,12995,13194,14479,14828,15516,17463,17999,18521,19053,19166,19170,19172,19175,19184,19185,19229,19359,20479,21402,21762,22027,22088,22123,22210,22218,22223,22224,22230,22258,22393,23997,26419,26440,26441,26442,26444,26554,26572,52551,54473,54609,56207,56424,56637,56736,57296,58799,59025,59029,63958,65019,66105,66413,66753,66861,66914,66997,67025,67089,67812,67923,69077,69116,698…	Akt1,Ctnnb1,Clu,Csnk2a1,Ddb1,Usp15,Hspa5,Hsp90ab1,Psmd7,Nedd4,Pcbp2,Ppp2cb,Psma2,Psmb1,Psmb4,Psmb6,Psmc5,Psmd4,Ptk2b,Rad23b,Vps4b,Skp1a,Psmd2,Hsp90b1,Tsg101,Psmd3,Ube2b,Sumo1,Uchl1,Usp10,Ufd1,Usp4,Wfs1,Psmd13,Mapk8,Psma1,Psma4,Psma5,Psma7,Cul3,Cops3,Sgta,Tollip,Ubqln2,Uchl5,Stub1,Gsk3b,Rnf14,Psmd8,Crbn,Usp14,Psmd14,Ube4b,Rpl23,Ube2d3,Psmd6,Erlec1,Dnajc10,Vps28,Psmd12,Rpl11,Psmc6,Ubxn4,Eloc,Psmd11…
6_Member	Reactome Gene Sets	R-MMU-5689603	UCH proteinases	-15.7082	-13.1882	32/96	15161,17463,18002,19166,19170,19172,19175,19179,19182,19184,19185,19188,21762,22123,22223,23996,23997,26440,26441,26442,26444,56207,56505,57296,59029,66413,66997,67089,69077,70247,78294,108155	Hcfc1,Psmd7,Nedd8,Psma2,Psmb1,Psmb4,Psmb6,Psmc1,Psmc3,Psmc5,Psmd4,Psme2,Psmd2,Psmd3,Uchl1,Psmc4,Psmd13,Psma1,Psma4,Psma5,Psma7,Uchl5,Ruvbl1,Psmd8,Psmd14,Psmd6,Psmd12,Psmc6,Psmd11,Psmd1,Rps27a,Ogt
6_Member	Reactome Gene Sets	R-MMU-174084	Autodegradation of Cdh1 by Cdh1:APC/C	-15.506	-13.0095	26/63	17463,19166,19170,19172,19175,19179,19182,19184,19185,19188,21762,22123,23996,23997,26440,26441,26442,26444,57296,59029,66413,66997,67089,69077,70247,78294	Psmd7,Psma2,Psmb1,Psmb4,Psmb6,Psmc1,Psmc3,Psmc5,Psmd4,Psme2,Psmd2,Psmd3,Psmc4,Psmd13,Psma1,Psma4,Psma5,Psma7,Psmd8,Psmd14,Psmd6,Psmd12,Psmc6,Psmd11,Psmd1,Rps27a
6_Member	Reactome Gene Sets	R-MMU-5688426	Deubiquitination	-14.771	-12.318	51/246	11848,14232,14479,15161,17463,18002,19166,19170,19172,19175,19179,19182,19184,19185,19188,19359,21762,22123,22223,22224,22230,22258,23996,23997,26440,26441,26442,26444,56207,56505,57296,59025,59029,59040,66413,66997,67089,67561,69077,70247,70527,71472,78294,84092,107260,108155,108645,109689,217057,236733,269523	Rhoa,Fkbp8,Usp15,Hcfc1,Psmd7,Nedd8,Psma2,Psmb1,Psmb4,Psmb6,Psmc1,Psmc3,Psmc5,Psmd4,Psme2,Rad23b,Psmd2,Psmd3,Uchl1,Usp10,Ufd1,Usp4,Psmc4,Psmd13,Psma1,Psma4,Psma5,Psma7,Uchl5,Ruvbl1,Psmd8,Usp14,Psmd14,Rhot1,Psmd6,Psmd12,Psmc6,Wdr48,Psmd11,Psmd1,Stambp,Usp19,Rps27a,Usp8,Otub1,Ogt,Mat2b,Arrb1,Ptrh2,Usp11,Vcp
6_Member	Reactome Gene Sets	R-MMU-68867	Assembly of the pre-replicative complex	-14.7256	-12.2861	26/67	17463,19166,19170,19172,19175,19179,19182,19184,19185,19188,21762,22123,23996,23997,26440,26441,26442,26444,57296,59029,66413,66997,67089,69077,70247,78294	Psmd7,Psma2,Psmb1,Psmb4,Psmb6,Psmc1,Psmc3,Psmc5,Psmd4,Psme2,Psmd2,Psmd3,Psmc4,Psmd13,Psma1,Psma4,Psma5,Psma7,Psmd8,Psmd14,Psmd6,Psmd12,Psmc6,Psmd11,Psmd1,Rps27a
6_Member	Reactome Gene Sets	R-MMU-1640170	Cell Cycle	-14.2971	-11.8836	82/551	12237,12576,13424,13426,15516,15519,16563,17463,18221,18472,18747,18751,19046,19047,19052,19053,19166,19170,19172,19175,19179,19182,19184,19185,19188,19386,19387,19646,21402,21762,21770,22123,22218,22628,22629,22631,23996,23997,26370,26413,26417,26440,26441,26442,26444,27223,51788,51792,52696,53598,54130,56430,56505,57296,57321,59029,66413,66679,66997,67089,69077,69654,70231,70247,70620,71978,725…	Bub3,Cdkn1b,Dync1h1,Dync1i1,Hsp90ab1,Hsp90aa1,Kif2a,Psmd7,Nudc,Pafah1b1,Prkaca,Prkcb,Ppp1cb,Ppp1cc,Ppp2ca,Ppp2cb,Psma2,Psmb1,Psmb4,Psmb6,Psmc1,Psmc3,Psmc5,Psmd4,Psme2,Ranbp2,Rangap1,Rbbp4,Skp1a,Psmd2,Ppp2r5d,Psmd3,Sumo1,Ywhag,Ywhah,Ywhaz,Psmc4,Psmd13,Cetn2,Mapk1,Mapk3,Psma1,Psma4,Psma5,Psma7,Trp53bp1,H2afz,Ppp2r1a,Zwint,Dctn3,Actr1a,Clip1,Ruvbl1,Psmd8,Terf2ip,Psmd14,Psmd6,Rae1,Psmd12,Psmc6,Psmd11…
6_Member	Reactome Gene Sets	R-MMU-5689880	Ub-specific processing proteases	-14.0551	-11.672	42/181	14232,14479,17463,19166,19170,19172,19175,19179,19182,19184,19185,19188,21762,22123,22224,22230,22258,23996,23997,26440,26441,26442,26444,56505,57296,59025,59029,59040,66413,66997,67089,67561,69077,70247,71472,78294,84092,107260,108645,109689,217057,236733	Fkbp8,Usp15,Psmd7,Psma2,Psmb1,Psmb4,Psmb6,Psmc1,Psmc3,Psmc5,Psmd4,Psme2,Psmd2,Psmd3,Usp10,Ufd1,Usp4,Psmc4,Psmd13,Psma1,Psma4,Psma5,Psma7,Ruvbl1,Psmd8,Usp14,Psmd14,Rhot1,Psmd6,Psmd12,Psmc6,Wdr48,Psmd11,Psmd1,Usp19,Rps27a,Usp8,Otub1,Mat2b,Arrb1,Ptrh2,Usp11
6_Member	Reactome Gene Sets	R-MMU-174143	APC/C-mediated degradation of cell cycle proteins	-13.5085	-11.1956	27/80	12237,17463,19166,19170,19172,19175,19179,19182,19184,19185,19188,21762,22123,23996,23997,26440,26441,26442,26444,57296,59029,66413,66997,67089,69077,70247,78294	Bub3,Psmd7,Psma2,Psmb1,Psmb4,Psmb6,Psmc1,Psmc3,Psmc5,Psmd4,Psme2,Psmd2,Psmd3,Psmc4,Psmd13,Psma1,Psma4,Psma5,Psma7,Psmd8,Psmd14,Psmd6,Psmd12,Psmc6,Psmd11,Psmd1,Rps27a
6_Member	Reactome Gene Sets	R-MMU-453276	Regulation of mitotic cell cycle	-13.5085	-11.1956	27/80	12237,17463,19166,19170,19172,19175,19179,19182,19184,19185,19188,21762,22123,23996,23997,26440,26441,26442,26444,57296,59029,66413,66997,67089,69077,70247,78294	Bub3,Psmd7,Psma2,Psmb1,Psmb4,Psmb6,Psmc1,Psmc3,Psmc5,Psmd4,Psme2,Psmd2,Psmd3,Psmc4,Psmd13,Psma1,Psma4,Psma5,Psma7,Psmd8,Psmd14,Psmd6,Psmd12,Psmc6,Psmd11,Psmd1,Rps27a
6_Member	GO Biological Processes	GO:0043161	proteasome-mediated ubiquitin-dependent protein catabolic process	-13.4843	-11.1764	65/395	11651,12387,12759,13194,14828,15516,17463,17999,18521,19053,19166,19170,19172,19175,19184,19185,19359,21402,21762,22027,22210,22218,22393,26419,26440,26441,26442,26444,26554,52551,54609,56207,56424,56637,56736,57296,58799,59025,59029,63958,66105,66413,66753,66861,66997,67025,67089,67812,70247,70620,71472,71745,76454,76577,80890,83814,93687,99375,108155,109689,213990,214931,219158,225896,269523	Akt1,Ctnnb1,Clu,Ddb1,Hspa5,Hsp90ab1,Psmd7,Nedd4,Pcbp2,Ppp2cb,Psma2,Psmb1,Psmb4,Psmb6,Psmc5,Psmd4,Rad23b,Skp1a,Psmd2,Hsp90b1,Ube2b,Sumo1,Wfs1,Mapk8,Psma1,Psma4,Psma5,Psma7,Cul3,Sgta,Ubqln2,Uchl5,Stub1,Gsk3b,Rnf14,Psmd8,Crbn,Usp14,Psmd14,Ube4b,Ube2d3,Psmd6,Erlec1,Dnajc10,Psmd12,Rpl11,Psmc6,Ubxn4,Psmd1,Ube2v2,Usp19,Cul2,Fbxo31,Faf2,Trim2,Nedd4l,Csnk1a1,Cul4a,Ogt,Arrb1,Agap3,Fbxl16,Ccar2,Ubxn1,Vcp
6_Member	Reactome Gene Sets	R-MMU-69278	Cell Cycle, Mitotic	-12.7108	-10.4998	73/492	12237,12576,13424,13426,15516,15519,16563,17463,18221,18472,18747,18751,19046,19047,19052,19053,19166,19170,19172,19175,19179,19182,19184,19185,19188,19386,19387,19646,21402,21762,21770,22123,22628,23996,23997,26370,26413,26417,26440,26441,26442,26444,51788,51792,52696,53598,54130,56430,57296,59029,66413,66679,66997,67089,69077,69654,70231,70247,71978,72590,74237,75786,76308,76499,76707,78294,100…	Bub3,Cdkn1b,Dync1h1,Dync1i1,Hsp90ab1,Hsp90aa1,Kif2a,Psmd7,Nudc,Pafah1b1,Prkaca,Prkcb,Ppp1cb,Ppp1cc,Ppp2ca,Ppp2cb,Psma2,Psmb1,Psmb4,Psmb6,Psmc1,Psmc3,Psmc5,Psmd4,Psme2,Ranbp2,Rangap1,Rbbp4,Skp1a,Psmd2,Ppp2r5d,Psmd3,Ywhag,Psmc4,Psmd13,Cetn2,Mapk1,Mapk3,Psma1,Psma4,Psma5,Psma7,H2afz,Ppp2r1a,Zwint,Dctn3,Actr1a,Clip1,Psmd8,Psmd14,Psmd6,Rae1,Psmd12,Psmc6,Psmd11,Dctn2,Gorasp2,Psmd1,Ppp2r2a,Ppme1,Tubgcp2…
6_Member	Reactome Gene Sets	R-MMU-69002	DNA Replication Pre-Initiation	-12.3076	-10.1452	26/82	17463,19166,19170,19172,19175,19179,19182,19184,19185,19188,21762,22123,23996,23997,26440,26441,26442,26444,57296,59029,66413,66997,67089,69077,70247,78294	Psmd7,Psma2,Psmb1,Psmb4,Psmb6,Psmc1,Psmc3,Psmc5,Psmd4,Psme2,Psmd2,Psmd3,Psmc4,Psmd13,Psma1,Psma4,Psma5,Psma7,Psmd8,Psmd14,Psmd6,Psmd12,Psmc6,Psmd11,Psmd1,Rps27a
6_Member	Reactome Gene Sets	R-MMU-8951664	Neddylation	-11.7087	-9.60551	43/219	13194,17463,18002,19166,19170,19172,19175,19179,19182,19184,19185,19188,21402,21762,22123,22192,23996,23997,26440,26441,26442,26444,26554,26572,26894,57296,59029,66105,66413,66997,67089,67673,67923,69077,70247,71745,71902,76454,78294,99375,108679,214931,245688	Ddb1,Psmd7,Nedd8,Psma2,Psmb1,Psmb4,Psmb6,Psmc1,Psmc3,Psmc5,Psmd4,Psme2,Skp1a,Psmd2,Psmd3,Ube2m,Psmc4,Psmd13,Psma1,Psma4,Psma5,Psma7,Cul3,Cops3,Cops7a,Psmd8,Psmd14,Ube2d3,Psmd6,Psmd12,Psmc6,Elob,Eloc,Psmd11,Psmd1,Cul2,Cand1,Fbxo31,Rps27a,Cul4a,Cops8,Fbxl16,Rbbp7
6_Member	KEGG Pathway	mmu05169	Epstein-Barr virus infection	-8.74676	-6.84655	38/220	11651,12576,12914,12995,13001,15007,15182,15481,15507,17463,17999,18036,18747,19179,19182,19184,19185,19384,21762,22123,22628,22629,22631,23996,23997,26398,26400,26414,26419,56463,56637,57296,59029,66413,66997,67089,69077,70247	Akt1,Cdkn1b,Crebbp,Csnk2a1,Csnk2b,H2-Q10,Hdac2,Hspa8,Hspb1,Psmd7,Nedd4,Nfkbib,Prkaca,Psmc1,Psmc3,Psmc5,Psmd4,Ran,Psmd2,Psmd3,Ywhag,Ywhah,Ywhaz,Psmc4,Psmd13,Map2k4,Map2k7,Mapk10,Mapk8,Snd1,Gsk3b,Psmd8,Psmd14,Psmd6,Psmd12,Psmc6,Psmd11,Psmd1
6_Member	Reactome Gene Sets	R-MMU-69306	DNA Replication	-8.70347	-6.8071	27/123	17463,19166,19170,19172,19175,19179,19182,19184,19185,19188,21402,21762,22123,23996,23997,26440,26441,26442,26444,57296,59029,66413,66997,67089,69077,70247,78294	Psmd7,Psma2,Psmb1,Psmb4,Psmb6,Psmc1,Psmc3,Psmc5,Psmd4,Psme2,Skp1a,Psmd2,Psmd3,Psmc4,Psmd13,Psma1,Psma4,Psma5,Psma7,Psmd8,Psmd14,Psmd6,Psmd12,Psmc6,Psmd11,Psmd1,Rps27a
6_Member	GO Biological Processes	GO:0010499	proteasomal ubiquitin-independent protein catabolic process	-4.36695	-2.95025	8/24	19166,19170,19172,19175,26440,26441,26442,26444	Psma2,Psmb1,Psmb4,Psmb6,Psma1,Psma4,Psma5,Psma7
7_Summary	Reactome Gene Sets	R-MMU-6798695	Neutrophil degranulation	-23.256	-20.045	96/523	11625,11674,11676,11848,11881,11886,12283,12306,12331,12359,12461,12469,13001,13010,13030,13033,13169,13205,13424,13627,13629,14319,14387,14569,14667,14751,14824,15007,15212,15369,15481,15516,15519,16211,16480,16498,16784,16993,17463,18475,18746,18813,19156,19166,19170,19182,19330,19339,19342,19344,19346,19349,20195,20614,20719,21762,21968,22123,22139,23918,23997,26413,26442,26949,30960,53328,544…	Ahsg,Aldoa,Aldoc,Rhoa,Arsb,Asah1,Cab39,Anxa2,Cap1,Cat,Cct2,Cct8,Csnk2b,Cst3,Ctsb,Ctsd,Dbnl,Ddx3x,Dync1h1,Eef1a1,Eef2,Fth1,Gaa,Gdi2,Gm2a,Gpi1,Grn,H2-Q10,Hexb,Hmox2,Hspa8,Hsp90ab1,Hsp90aa1,Kpnb1,Jup,Kcnab2,Lamp2,Lta4h,Psmd7,Pafah1b2,Pkm,Pa2g4,Psap,Psma2,Psmb1,Psmc3,Rab18,Rab3a,Rab4b,Rab5b,Rab6a,Rab7,S100a11,Snap25,Serpinb6a,Psmd2,Tom1,Psmd3,Ttr,Impdh2,Psmd13,Mapk1,Psma5,Vat1,Vapa,Pgrmc1,Tollip,Actr…
7_Member	Reactome Gene Sets	R-MMU-6798695	Neutrophil degranulation	-23.256	-20.045	96/523	11625,11674,11676,11848,11881,11886,12283,12306,12331,12359,12461,12469,13001,13010,13030,13033,13169,13205,13424,13627,13629,14319,14387,14569,14667,14751,14824,15007,15212,15369,15481,15516,15519,16211,16480,16498,16784,16993,17463,18475,18746,18813,19156,19166,19170,19182,19330,19339,19342,19344,19346,19349,20195,20614,20719,21762,21968,22123,22139,23918,23997,26413,26442,26949,30960,53328,544…	Ahsg,Aldoa,Aldoc,Rhoa,Arsb,Asah1,Cab39,Anxa2,Cap1,Cat,Cct2,Cct8,Csnk2b,Cst3,Ctsb,Ctsd,Dbnl,Ddx3x,Dync1h1,Eef1a1,Eef2,Fth1,Gaa,Gdi2,Gm2a,Gpi1,Grn,H2-Q10,Hexb,Hmox2,Hspa8,Hsp90ab1,Hsp90aa1,Kpnb1,Jup,Kcnab2,Lamp2,Lta4h,Psmd7,Pafah1b2,Pkm,Pa2g4,Psap,Psma2,Psmb1,Psmc3,Rab18,Rab3a,Rab4b,Rab5b,Rab6a,Rab7,S100a11,Snap25,Serpinb6a,Psmd2,Tom1,Psmd3,Ttr,Impdh2,Psmd13,Mapk1,Psma5,Vat1,Vapa,Pgrmc1,Tollip,Actr…
8_Summary	GO Biological Processes	GO:0043254	regulation of protein complex assembly	-22.5384	-19.4321	87/452	11657,11789,11816,11840,11848,12386,12387,12576,12759,12955,13169,13196,13205,13494,13829,13854,14228,14489,14544,14784,15161,15519,16210,16765,16784,17698,17755,17756,17762,17886,17957,18479,18643,18754,19042,19182,19184,19229,19230,19247,19339,19684,20024,20239,20362,21916,22218,22375,23789,23881,23996,26419,27041,50876,54418,56327,56424,56430,56637,58799,63985,65114,67089,69017,71732,71902,731…	Alb,Apc,Apoe,Arf1,Rhoa,Ctnna2,Ctnnb1,Cdkn1b,Clu,Cryab,Dbnl,Asap1,Ddx3x,Drg1,Dmtn,Epn1,Fkbp4,Mtpn,Gda,Grb2,Hcfc1,Hsp90aa1,Impact,Stmn1,Lamp2,Msn,Map1b,Map2,Mapt,Myh9,Napb,Pak1,Pfn1,Prkce,Ppm1a,Psmc3,Psmc5,Ptk2b,Twf1,Ptpn11,Rab3a,Rdx,Sub1,Atxn2,Sept8,Tmod1,Sumo1,Wars,Coro1b,G3bp2,Psmc4,Mapk8,G3bp1,Tmod2,Fmn2,Arl2,Stub1,Clip1,Gsk3b,Crbn,Gmfb,Vps35,Psmc6,Prrt2,Vps11,Cand1,Wasl,Atat1,Dnm1l,Arpc5l,Clas…
8_Member	GO Biological Processes	GO:0043254	regulation of protein complex assembly	-22.5384	-19.4321	87/452	11657,11789,11816,11840,11848,12386,12387,12576,12759,12955,13169,13196,13205,13494,13829,13854,14228,14489,14544,14784,15161,15519,16210,16765,16784,17698,17755,17756,17762,17886,17957,18479,18643,18754,19042,19182,19184,19229,19230,19247,19339,19684,20024,20239,20362,21916,22218,22375,23789,23881,23996,26419,27041,50876,54418,56327,56424,56430,56637,58799,63985,65114,67089,69017,71732,71902,731…	Alb,Apc,Apoe,Arf1,Rhoa,Ctnna2,Ctnnb1,Cdkn1b,Clu,Cryab,Dbnl,Asap1,Ddx3x,Drg1,Dmtn,Epn1,Fkbp4,Mtpn,Gda,Grb2,Hcfc1,Hsp90aa1,Impact,Stmn1,Lamp2,Msn,Map1b,Map2,Mapt,Myh9,Napb,Pak1,Pfn1,Prkce,Ppm1a,Psmc3,Psmc5,Ptk2b,Twf1,Ptpn11,Rab3a,Rdx,Sub1,Atxn2,Sept8,Tmod1,Sumo1,Wars,Coro1b,G3bp2,Psmc4,Mapk8,G3bp1,Tmod2,Fmn2,Arl2,Stub1,Clip1,Gsk3b,Crbn,Gmfb,Vps35,Psmc6,Prrt2,Vps11,Cand1,Wasl,Atat1,Dnm1l,Arpc5l,Clas…
8_Member	GO Biological Processes	GO:0097435	supramolecular fiber organization	-19.2858	-16.4137	105/683	11308,11789,11806,11816,11820,11840,11848,11852,12306,12331,12386,12406,12540,12576,12632,12704,12759,12955,13007,13010,13169,13424,13494,13518,13800,13829,14228,14457,14489,14544,14784,15182,15481,15516,16202,16211,16765,17118,17755,17756,17762,17886,18472,18479,18643,18754,19084,19229,19230,19684,19878,20262,20411,20971,21916,22027,22041,22793,23789,23969,26419,26554,50876,52822,54418,56327,563…	Abi1,Apc,Apoa1,Apoe,App,Arf1,Rhoa,Rhob,Anxa2,Cap1,Ctnna2,Serpinh1,Cdc42,Cdkn1b,Cfl2,Cit,Clu,Cryab,Csrp1,Cst3,Dbnl,Dync1h1,Drg1,Dst,Enah,Dmtn,Fkbp4,Gas7,Mtpn,Gda,Grb2,Hdac2,Hspa8,Hsp90ab1,Ilk,Kpnb1,Stmn1,Marcks,Map1b,Map2,Mapt,Myh9,Pafah1b1,Pak1,Pfn1,Prkce,Prkar1a,Ptk2b,Twf1,Rdx,Rock2,Stmn3,Sorbs1,Sdc4,Tmod1,Hsp90b1,Trf,Zyx,Coro1b,Pacsin1,Mapk8,Cul3,Tmod2,Rufy3,Fmn2,Arl2,Chp1,Clip1,Dstn,Actn4,Gmfb…
8_Member	GO Biological Processes	GO:0051493	regulation of cytoskeleton organization	-17.8784	-15.0732	88/539	11789,11806,11840,11848,11852,12334,12386,12387,12540,12576,12632,12704,13039,13169,13424,13494,13518,13829,14228,14489,14544,14677,14784,15182,15505,16202,16765,16971,17755,17756,17762,17886,18472,18479,18484,18571,18643,18754,19229,19230,19385,19684,19878,20262,20479,20971,21916,23789,26413,26417,26419,50876,51810,54418,56327,56430,56431,56637,63985,66679,68606,73178,74192,75608,76499,76707,769…	Apc,Apoa1,Arf1,Rhoa,Rhob,Capn2,Ctnna2,Ctnnb1,Cdc42,Cdkn1b,Cfl2,Cit,Ctsl,Dbnl,Dync1h1,Drg1,Dst,Dmtn,Fkbp4,Mtpn,Gda,Gnai1,Grb2,Hdac2,Hsph1,Ilk,Stmn1,Lrp1,Map1b,Map2,Mapt,Myh9,Pafah1b1,Pak1,Pam,Pdcd6ip,Pfn1,Prkce,Ptk2b,Twf1,Ranbp1,Rdx,Rock2,Stmn3,Vps4b,Sdc4,Tmod1,Coro1b,Mapk1,Mapk3,Mapk8,Tmod2,Hnrnpu,Fmn2,Arl2,Clip1,Dstn,Gsk3b,Gmfb,Rae1,Ppm1f,Wasl,Arpc5l,Chmp4b,Clasp2,Clasp1,Chmp5,Limch1,Wasf1,Mapre…
8_Member	GO Biological Processes	GO:0030029	actin filament-based process	-17.8017	-15.0117	108/747	11308,11785,11806,11840,11848,11852,12293,12331,12386,12540,12568,12632,12704,13007,13039,13169,13800,13823,13829,14248,14457,14489,14784,15182,16202,16480,16765,16971,17118,17886,17904,17918,18125,18472,18479,18484,18571,18643,18754,19084,19229,19230,19384,19684,19878,20411,20971,21894,21916,22027,22041,22218,22793,23789,23969,26554,50876,50932,52822,54126,54418,56431,60595,63985,64652,67252,686…	Abi1,Apbb1,Apoa1,Arf1,Rhoa,Rhob,Cacna2d1,Cap1,Ctnna2,Cdc42,Cdk5,Cfl2,Cit,Csrp1,Ctsl,Dbnl,Enah,Epb41l3,Dmtn,Flii,Gas7,Mtpn,Grb2,Hdac2,Ilk,Jup,Stmn1,Lrp1,Marcks,Myh9,Myl6,Myo5a,Nos1,Pafah1b1,Pak1,Pam,Pdcd6ip,Pfn1,Prkce,Prkar1a,Ptk2b,Twf1,Ran,Rdx,Rock2,Sorbs1,Sdc4,Tln1,Tmod1,Hsp90b1,Trf,Sumo1,Zyx,Coro1b,Pacsin1,Cul3,Tmod2,Mink1,Rufy3,Arhgef7,Fmn2,Dstn,Actn4,Gmfb,Nisch,Cap2,Ppm1f,Trim32,Arhgap26,Myh1…
8_Member	GO Biological Processes	GO:0030036	actin cytoskeleton organization	-17.7344	-14.9717	100/664	11308,11806,11840,11848,11852,12331,12386,12540,12568,12632,12704,13007,13039,13169,13800,13823,13829,14248,14457,14489,14784,15182,16202,16765,16971,17118,17886,18472,18479,18484,18571,18643,18754,19084,19229,19230,19384,19684,19878,20411,20971,21894,21916,22027,22041,22793,23789,23969,26554,50876,50932,52822,54126,54418,56431,60595,63985,64652,67252,68606,69807,71302,71960,71994,73178,74192,764…	Abi1,Apoa1,Arf1,Rhoa,Rhob,Cap1,Ctnna2,Cdc42,Cdk5,Cfl2,Cit,Csrp1,Ctsl,Dbnl,Enah,Epb41l3,Dmtn,Flii,Gas7,Mtpn,Grb2,Hdac2,Ilk,Stmn1,Lrp1,Marcks,Myh9,Pafah1b1,Pak1,Pam,Pdcd6ip,Pfn1,Prkce,Prkar1a,Ptk2b,Twf1,Ran,Rdx,Rock2,Sorbs1,Sdc4,Tln1,Tmod1,Hsp90b1,Trf,Zyx,Coro1b,Pacsin1,Cul3,Tmod2,Mink1,Rufy3,Arhgef7,Fmn2,Dstn,Actn4,Gmfb,Nisch,Cap2,Ppm1f,Trim32,Arhgap26,Myh14,Cnn3,Wasl,Arpc5l,Daam2,Clasp2,Clasp1,Li…
8_Member	GO Biological Processes	GO:1902903	regulation of supramolecular fiber organization	-15.6013	-13.0893	64/349	11789,11806,11816,11820,11840,11848,12386,12576,12632,12704,12759,12955,13169,13494,13829,14228,14489,14544,14784,15182,15481,16765,17755,17756,17762,17886,18479,18643,18754,19229,19230,19684,19878,20971,21916,23789,26419,50876,54418,56327,56430,56431,63985,68606,73178,74192,76499,76707,77569,83767,100732,101314,101706,104027,108100,110380,192176,216965,227634,229589,232906,243725,277468,320472	Apc,Apoa1,Apoe,App,Arf1,Rhoa,Ctnna2,Cdkn1b,Cfl2,Cit,Clu,Cryab,Dbnl,Drg1,Dmtn,Fkbp4,Mtpn,Gda,Grb2,Hdac2,Hspa8,Stmn1,Map1b,Map2,Mapt,Myh9,Pak1,Pfn1,Prkce,Ptk2b,Twf1,Rdx,Rock2,Sdc4,Tmod1,Coro1b,Mapk8,Tmod2,Fmn2,Arl2,Clip1,Dstn,Gmfb,Ppm1f,Wasl,Arpc5l,Clasp2,Clasp1,Limch1,Wasf1,Mapre3,Brk1,Numa1,Synpo,Baiap2,Shroom2,Flna,Taok1,Camsap1,Prune1,Arhgap35,Ppp1r9a,Slc39a12,Ppm1e
8_Member	GO Biological Processes	GO:0051258	protein polymerization	-13.9355	-11.564	53/275	11789,11840,11848,12386,12576,13169,13494,13829,14161,14228,14457,14489,14544,14784,15519,16765,17755,17756,17762,17886,18479,18643,18754,19229,19230,19684,21916,23789,26419,50876,54418,56327,56430,63985,73178,74006,74192,74237,75786,76499,76707,83767,99571,100732,101314,101706,108100,110135,227634,229589,243725,277468,625249	Apc,Arf1,Rhoa,Ctnna2,Cdkn1b,Dbnl,Drg1,Dmtn,Fga,Fkbp4,Gas7,Mtpn,Gda,Grb2,Hsp90aa1,Stmn1,Map1b,Map2,Mapt,Myh9,Pak1,Pfn1,Prkce,Ptk2b,Twf1,Rdx,Tmod1,Coro1b,Mapk8,Tmod2,Fmn2,Arl2,Clip1,Gmfb,Wasl,Dnm1l,Arpc5l,Tubgcp2,Ckap5,Clasp2,Clasp1,Wasf1,Fgg,Mapre3,Brk1,Numa1,Baiap2,Fgb,Camsap1,Prune1,Ppp1r9a,Slc39a12,Gpx4
8_Member	GO Biological Processes	GO:0007015	actin filament organization	-13.6345	-11.296	66/402	11308,11806,11840,11848,11852,12331,12386,12540,12632,12704,13169,13800,13829,14457,14489,14784,16765,17118,17886,18479,18643,18754,19229,19230,19684,19878,20411,20971,21916,22027,22041,22793,23789,23969,26554,50876,52822,54418,56431,60595,63985,67252,68606,73178,74192,76499,76707,77569,77579,77767,78885,83767,101314,102866,104027,108100,109689,110380,192176,217124,218194,232906,234214,243725,320…	Abi1,Apoa1,Arf1,Rhoa,Rhob,Cap1,Ctnna2,Cdc42,Cfl2,Cit,Dbnl,Enah,Dmtn,Gas7,Mtpn,Grb2,Stmn1,Marcks,Myh9,Pak1,Pfn1,Prkce,Ptk2b,Twf1,Rdx,Rock2,Sorbs1,Sdc4,Tmod1,Hsp90b1,Trf,Zyx,Coro1b,Pacsin1,Cul3,Tmod2,Rufy3,Fmn2,Dstn,Actn4,Gmfb,Cap2,Ppm1f,Wasl,Arpc5l,Clasp2,Clasp1,Limch1,Myh10,Ermn,Coro7,Wasf1,Brk1,Pls3,Synpo,Baiap2,Arrb1,Shroom2,Flna,Ppp1r9b,Phactr1,Arhgap35,Sorbs2,Ppp1r9a,Ppm1e,Pakap
8_Member	GO Biological Processes	GO:0010638	positive regulation of organelle organization	-13.3117	-11.0135	84/595	11789,11806,11840,11848,12306,12323,12386,12387,12461,12462,12464,12465,12466,12468,12469,12539,12576,12632,13196,13424,13494,14265,14544,14784,14824,17698,17755,17762,18125,18479,18571,18643,18754,19229,19385,19878,20479,20971,20981,21454,21849,22210,23789,23881,26400,26413,26417,26419,26554,27041,51810,54418,54525,56327,56430,56431,56637,63985,65114,66317,68606,69017,69605,71514,73178,74006,741…	Apc,Apoa1,Arf1,Rhoa,Anxa2,Camk2b,Ctnna2,Ctnnb1,Cct2,Cct3,Cct4,Cct5,Cct6a,Cct7,Cct8,Cdc37,Cdkn1b,Cfl2,Asap1,Dync1h1,Drg1,Fmr1,Gda,Grb2,Grn,Msn,Map1b,Mapt,Nos1,Pak1,Pdcd6ip,Pfn1,Prkce,Ptk2b,Ranbp1,Rock2,Vps4b,Sdc4,Syt3,Tcp1,Trim28,Ube2b,Coro1b,G3bp2,Map2k7,Mapk1,Mapk3,Mapk8,Cul3,G3bp1,Hnrnpu,Fmn2,Syt7,Arl2,Clip1,Dstn,Gsk3b,Gmfb,Vps35,Wdr61,Ppm1f,Prrt2,Lnpk,Sfpq,Wasl,Dnm1l,Arpc5l,Limch1,Wasf1,Ube2n,…
8_Member	GO Biological Processes	GO:0044089	positive regulation of cellular component biogenesis	-12.7201	-10.5051	77/534	11789,11806,11840,11848,12386,12387,12540,12576,12652,12759,13196,13424,13494,13854,14265,14544,14784,15519,17698,17755,17762,18189,18212,18479,18483,18571,18643,18754,19182,19184,19229,19349,19878,20024,20479,20971,22088,22218,22375,23789,23881,23996,26419,27041,54418,56327,56424,56430,56637,63985,67089,67674,68606,70620,71902,73178,73242,74192,76499,76707,77569,83767,98732,101314,101706,103967,…	Apc,Apoa1,Arf1,Rhoa,Ctnna2,Ctnnb1,Cdc42,Cdkn1b,Chga,Clu,Asap1,Dync1h1,Drg1,Epn1,Fmr1,Gda,Grb2,Hsp90aa1,Msn,Map1b,Mapt,Nrxn1,Ntrk2,Pak1,Palm,Pdcd6ip,Pfn1,Prkce,Psmc3,Psmc5,Ptk2b,Rab7,Rock2,Sub1,Vps4b,Sdc4,Tsg101,Sumo1,Wars,Coro1b,G3bp2,Psmc4,Mapk8,G3bp1,Fmn2,Arl2,Stub1,Clip1,Gsk3b,Gmfb,Psmc6,Trmt112,Ppm1f,Ube2v2,Cand1,Wasl,Atat1,Arpc5l,Clasp2,Clasp1,Limch1,Wasf1,Rab3gap2,Brk1,Numa1,Dnm3,Synpo,Baia…
8_Member	GO Biological Processes	GO:0032271	regulation of protein polymerization	-12.5477	-10.3522	44/216	11789,11840,11848,12386,12576,13169,13494,13829,14228,14489,14544,14784,15519,16765,17755,17756,17762,17886,18479,18643,18754,19229,19230,19684,21916,23789,26419,50876,54418,56327,56430,63985,73178,74192,76499,83767,100732,101314,101706,108100,227634,229589,243725,277468	Apc,Arf1,Rhoa,Ctnna2,Cdkn1b,Dbnl,Drg1,Dmtn,Fkbp4,Mtpn,Gda,Grb2,Hsp90aa1,Stmn1,Map1b,Map2,Mapt,Myh9,Pak1,Pfn1,Prkce,Ptk2b,Twf1,Rdx,Tmod1,Coro1b,Mapk8,Tmod2,Fmn2,Arl2,Clip1,Gmfb,Wasl,Arpc5l,Clasp2,Wasf1,Mapre3,Brk1,Numa1,Baiap2,Camsap1,Prune1,Ppp1r9a,Slc39a12
8_Member	GO Biological Processes	GO:0031334	positive regulation of protein complex assembly	-12.2839	-10.1249	47/246	11789,11840,11848,12386,12387,12576,12759,13196,13494,13854,14544,14784,15519,17698,17755,17762,18479,18643,18754,19182,19184,19229,20024,22218,22375,23789,23881,23996,26419,27041,54418,56327,56424,56430,56637,63985,67089,71902,73178,73242,74192,83767,101314,101706,108100,208643,269523	Apc,Arf1,Rhoa,Ctnna2,Ctnnb1,Cdkn1b,Clu,Asap1,Drg1,Epn1,Gda,Grb2,Hsp90aa1,Msn,Map1b,Mapt,Pak1,Pfn1,Prkce,Psmc3,Psmc5,Ptk2b,Sub1,Sumo1,Wars,Coro1b,G3bp2,Psmc4,Mapk8,G3bp1,Fmn2,Arl2,Stub1,Clip1,Gsk3b,Gmfb,Psmc6,Cand1,Wasl,Atat1,Arpc5l,Wasf1,Brk1,Numa1,Baiap2,Eif4g1,Vcp
8_Member	GO Biological Processes	GO:0051495	positive regulation of cytoskeleton organization	-9.98935	-8.00413	40/218	11789,11806,11840,11848,12386,12576,12632,13424,13494,14544,14784,17755,17762,18479,18643,18754,19229,19385,19878,20479,20971,23789,26419,54418,56327,56430,56431,63985,68606,73178,74192,77569,83767,101314,101706,104027,108100,192176,192197,320472	Apc,Apoa1,Arf1,Rhoa,Ctnna2,Cdkn1b,Cfl2,Dync1h1,Drg1,Gda,Grb2,Map1b,Mapt,Pak1,Pfn1,Prkce,Ptk2b,Ranbp1,Rock2,Vps4b,Sdc4,Coro1b,Mapk8,Fmn2,Arl2,Clip1,Dstn,Gmfb,Ppm1f,Wasl,Arpc5l,Limch1,Wasf1,Brk1,Numa1,Synpo,Baiap2,Flna,Bcas3,Ppm1e
8_Member	GO Biological Processes	GO:0032535	regulation of cellular component size	-9.89872	-7.92048	58/398	11651,11750,11773,11816,11840,11848,12386,12568,12632,12704,12729,13169,13690,13829,14489,14567,14784,15441,15516,15519,16202,16728,16971,17755,17756,17762,17886,18472,18479,18643,18754,19229,19230,19684,21916,23789,50876,52822,54418,56431,56637,63985,68576,68585,73178,74192,76499,83767,101314,108100,108155,110380,216344,232906,243725,271457,380711,382253	Akt1,Anxa7,Ap2m1,Apoe,Arf1,Rhoa,Ctnna2,Cdk5,Cfl2,Cit,Clns1a,Dbnl,Eif4g2,Dmtn,Mtpn,Gdi1,Grb2,Hp1bp3,Hsp90ab1,Hsp90aa1,Ilk,L1cam,Lrp1,Map1b,Map2,Mapt,Myh9,Pafah1b1,Pak1,Pfn1,Prkce,Ptk2b,Twf1,Rdx,Tmod1,Coro1b,Tmod2,Rufy3,Fmn2,Dstn,Gsk3b,Gmfb,Lamtor5,Rtn4,Wasl,Arpc5l,Clasp2,Wasf1,Brk1,Baiap2,Ogt,Shroom2,Rab21,Arhgap35,Ppp1r9a,Rab5a,Rap1gap2,Cdkl5
8_Member	GO Biological Processes	GO:1902905	positive regulation of supramolecular fiber organization	-9.72036	-7.75127	37/195	11789,11806,11820,11840,11848,12386,12576,12632,13494,14544,14784,17755,17762,18479,18643,18754,19229,19878,20971,23789,26419,54418,56327,56430,56431,63985,68606,73178,74192,77569,83767,101314,101706,104027,108100,192176,320472	Apc,Apoa1,App,Arf1,Rhoa,Ctnna2,Cdkn1b,Cfl2,Drg1,Gda,Grb2,Map1b,Mapt,Pak1,Pfn1,Prkce,Ptk2b,Rock2,Sdc4,Coro1b,Mapk8,Fmn2,Arl2,Clip1,Dstn,Gmfb,Ppm1f,Wasl,Arpc5l,Limch1,Wasf1,Brk1,Numa1,Synpo,Baiap2,Flna,Ppm1e
8_Member	GO Biological Processes	GO:0032956	regulation of actin cytoskeleton organization	-9.46807	-7.51453	52/345	11806,11840,11848,11852,12386,12540,12632,12704,13039,13169,13829,14489,14784,15182,16202,16765,16971,17886,18479,18484,18643,18754,19229,19230,19684,19878,20971,21916,23789,50876,54418,56431,63985,68606,73178,74192,76499,76707,77569,83767,101314,104027,108100,110380,192176,192197,216831,216965,232906,243725,320472,381921	Apoa1,Arf1,Rhoa,Rhob,Ctnna2,Cdc42,Cfl2,Cit,Ctsl,Dbnl,Dmtn,Mtpn,Grb2,Hdac2,Ilk,Stmn1,Lrp1,Myh9,Pak1,Pam,Pfn1,Prkce,Ptk2b,Twf1,Rdx,Rock2,Sdc4,Tmod1,Coro1b,Tmod2,Fmn2,Dstn,Gmfb,Ppm1f,Wasl,Arpc5l,Clasp2,Clasp1,Limch1,Wasf1,Brk1,Synpo,Baiap2,Shroom2,Flna,Bcas3,Arhgap44,Taok1,Arhgap35,Ppp1r9a,Ppm1e,Taok2
8_Member	GO Biological Processes	GO:0032970	regulation of actin filament-based process	-9.20551	-7.26909	56/393	11806,11840,11848,11852,11938,12386,12540,12632,12704,13039,13169,13829,14489,14784,15182,16202,16480,16765,16971,17886,18125,18479,18484,18643,18754,19229,19230,19684,19878,20971,21916,22218,23789,50876,54418,56431,63985,68606,73178,74192,76499,76707,77569,83767,101314,104027,108100,110380,192176,192197,216831,216965,232906,243725,320472,381921	Apoa1,Arf1,Rhoa,Rhob,Atp2a2,Ctnna2,Cdc42,Cfl2,Cit,Ctsl,Dbnl,Dmtn,Mtpn,Grb2,Hdac2,Ilk,Jup,Stmn1,Lrp1,Myh9,Nos1,Pak1,Pam,Pfn1,Prkce,Ptk2b,Twf1,Rdx,Rock2,Sdc4,Tmod1,Sumo1,Coro1b,Tmod2,Fmn2,Dstn,Gmfb,Ppm1f,Wasl,Arpc5l,Clasp2,Clasp1,Limch1,Wasf1,Brk1,Synpo,Baiap2,Shroom2,Flna,Bcas3,Arhgap44,Taok1,Arhgap35,Ppp1r9a,Ppm1e,Taok2
8_Member	GO Biological Processes	GO:0032273	positive regulation of protein polymerization	-8.54033	-6.65716	27/125	11789,11840,11848,12386,12576,13494,14544,14784,15519,17755,17762,18479,18643,18754,19229,23789,26419,54418,56327,56430,63985,73178,74192,83767,101314,101706,108100	Apc,Arf1,Rhoa,Ctnna2,Cdkn1b,Drg1,Gda,Grb2,Hsp90aa1,Map1b,Mapt,Pak1,Pfn1,Prkce,Ptk2b,Coro1b,Mapk8,Fmn2,Arl2,Clip1,Gmfb,Wasl,Arpc5l,Wasf1,Brk1,Numa1,Baiap2
8_Member	GO Biological Processes	GO:0110053	regulation of actin filament organization	-8.37757	-6.49993	41/256	11806,11840,11848,12386,12632,12704,13169,13829,14489,14784,16765,17886,18479,18643,18754,19229,19230,19684,19878,20971,21916,23789,50876,54418,56431,63985,68606,73178,74192,76499,76707,77569,83767,101314,104027,108100,110380,192176,232906,243725,320472	Apoa1,Arf1,Rhoa,Ctnna2,Cfl2,Cit,Dbnl,Dmtn,Mtpn,Grb2,Stmn1,Myh9,Pak1,Pfn1,Prkce,Ptk2b,Twf1,Rdx,Rock2,Sdc4,Tmod1,Coro1b,Tmod2,Fmn2,Dstn,Gmfb,Ppm1f,Wasl,Arpc5l,Clasp2,Clasp1,Limch1,Wasf1,Brk1,Synpo,Baiap2,Shroom2,Flna,Arhgap35,Ppp1r9a,Ppm1e
8_Member	GO Biological Processes	GO:0090066	regulation of anatomical structure size	-7.97825	-6.13916	68/562	11651,11750,11773,11816,11840,11848,12386,12568,12632,12652,12704,12729,13169,13690,13829,14161,14489,14567,14609,14784,15441,15516,15519,16202,16728,16971,17755,17756,17762,17886,18125,18472,18479,18643,18754,19229,19230,19684,19878,20541,21916,23789,26395,50876,52822,54418,56431,56637,63985,68576,68585,73178,74192,76499,83767,99571,101314,108100,108155,110135,110355,110380,216344,232906,243725,…	Akt1,Anxa7,Ap2m1,Apoe,Arf1,Rhoa,Ctnna2,Cdk5,Cfl2,Chga,Cit,Clns1a,Dbnl,Eif4g2,Dmtn,Fga,Mtpn,Gdi1,Gja1,Grb2,Hp1bp3,Hsp90ab1,Hsp90aa1,Ilk,L1cam,Lrp1,Map1b,Map2,Mapt,Myh9,Nos1,Pafah1b1,Pak1,Pfn1,Prkce,Ptk2b,Twf1,Rdx,Rock2,Slc8a1,Tmod1,Coro1b,Map2k1,Tmod2,Rufy3,Fmn2,Dstn,Gsk3b,Gmfb,Lamtor5,Rtn4,Wasl,Arpc5l,Clasp2,Wasf1,Fgg,Brk1,Baiap2,Ogt,Fgb,Grk2,Shroom2,Rab21,Arhgap35,Ppp1r9a,Rab5a,Rap1gap2,Cdkl5
8_Member	GO Biological Processes	GO:0008154	actin polymerization or depolymerization	-7.60601	-5.80386	34/202	11308,11840,11848,12331,12386,12632,12704,13169,13800,13829,14457,14489,14784,17886,18643,18754,19229,19230,19684,21916,23789,50876,54418,56431,63985,67252,73178,74192,83767,101314,108100,110380,232906,243725	Abi1,Arf1,Rhoa,Cap1,Ctnna2,Cfl2,Cit,Dbnl,Enah,Dmtn,Gas7,Mtpn,Grb2,Myh9,Pfn1,Prkce,Ptk2b,Twf1,Rdx,Tmod1,Coro1b,Tmod2,Fmn2,Dstn,Gmfb,Cap2,Wasl,Arpc5l,Wasf1,Brk1,Baiap2,Shroom2,Arhgap35,Ppp1r9a
8_Member	GO Biological Processes	GO:0008064	regulation of actin polymerization or depolymerization	-6.33103	-4.67193	29/177	11840,11848,12386,12632,12704,13169,13829,14489,14784,17886,18643,18754,19229,19230,19684,21916,23789,50876,54418,56431,63985,73178,74192,83767,101314,108100,110380,232906,243725	Arf1,Rhoa,Ctnna2,Cfl2,Cit,Dbnl,Dmtn,Mtpn,Grb2,Myh9,Pfn1,Prkce,Ptk2b,Twf1,Rdx,Tmod1,Coro1b,Tmod2,Fmn2,Dstn,Gmfb,Wasl,Arpc5l,Wasf1,Brk1,Baiap2,Shroom2,Arhgap35,Ppp1r9a
8_Member	GO Biological Processes	GO:0030832	regulation of actin filament length	-6.17446	-4.54101	29/180	11840,11848,12386,12632,12704,13169,13829,14489,14784,17886,18643,18754,19229,19230,19684,21916,23789,50876,54418,56431,63985,73178,74192,83767,101314,108100,110380,232906,243725	Arf1,Rhoa,Ctnna2,Cfl2,Cit,Dbnl,Dmtn,Mtpn,Grb2,Myh9,Pfn1,Prkce,Ptk2b,Twf1,Rdx,Tmod1,Coro1b,Tmod2,Fmn2,Dstn,Gmfb,Wasl,Arpc5l,Wasf1,Brk1,Baiap2,Shroom2,Arhgap35,Ppp1r9a
8_Member	GO Biological Processes	GO:0030833	regulation of actin filament polymerization	-4.68464	-3.2309	24/160	11840,11848,12386,13169,13829,14489,14784,17886,18643,18754,19229,19230,19684,21916,23789,50876,54418,63985,73178,74192,83767,101314,108100,243725	Arf1,Rhoa,Ctnna2,Dbnl,Dmtn,Mtpn,Grb2,Myh9,Pfn1,Prkce,Ptk2b,Twf1,Rdx,Tmod1,Coro1b,Tmod2,Fmn2,Gmfb,Wasl,Arpc5l,Wasf1,Brk1,Baiap2,Ppp1r9a
8_Member	GO Biological Processes	GO:0030041	actin filament polymerization	-4.48568	-3.05566	25/175	11840,11848,12386,13169,13829,14457,14489,14784,17886,18643,18754,19229,19230,19684,21916,23789,50876,54418,63985,73178,74192,83767,101314,108100,243725	Arf1,Rhoa,Ctnna2,Dbnl,Dmtn,Gas7,Mtpn,Grb2,Myh9,Pfn1,Prkce,Ptk2b,Twf1,Rdx,Tmod1,Coro1b,Tmod2,Fmn2,Gmfb,Wasl,Arpc5l,Wasf1,Brk1,Baiap2,Ppp1r9a
8_Member	GO Biological Processes	GO:0030838	positive regulation of actin filament polymerization	-3.55135	-2.24016	15/92	11840,11848,12386,14784,18643,18754,19229,23789,54418,63985,73178,74192,83767,101314,108100	Arf1,Rhoa,Ctnna2,Grb2,Pfn1,Prkce,Ptk2b,Coro1b,Fmn2,Gmfb,Wasl,Arpc5l,Wasf1,Brk1,Baiap2
9_Summary	GO Biological Processes	GO:0006457	protein folding	-21.9505	-18.9023	48/153	11632,12330,12461,12462,12464,12465,12466,12468,12469,12539,12759,12955,14228,14824,14827,14828,15481,15502,15505,15507,15516,15519,15526,18221,18415,19035,19298,19386,21454,22027,50527,52551,56351,56354,56424,56612,63958,66861,67035,67072,67738,67943,68816,70356,83945,93684,209586,230866,11785,11806,13838,14682,15161,16784,18643,22210,22218,22393,29810,56398,65019,67025,67955,68585,71472,74838,1…	Aip,Canx,Cct2,Cct3,Cct4,Cct5,Cct6a,Cct7,Cct8,Cdc37,Clu,Cryab,Fkbp4,Grn,Pdia3,Hspa5,Hspa8,Dnaja1,Hsph1,Hspb1,Hsp90ab1,Hsp90aa1,Hspa9,Nudc,Hspa4l,Ppib,Pex19,Ranbp2,Tcp1,Hsp90b1,Ero1l,Sgta,Ptges3,Dnajc7,Stub1,Pfdn5,Ube4b,Dnajc10,Dnajb4,Cdc37l1,Ppid,Mesd,Ppil1,St13,Dnaja3,Selenof,Nudcd3,Emc1,Apbb1,Apoa1,Epha4,Gnaq,Hcfc1,Lamp2,Pfn1,Ube2b,Sumo1,Wfs1,Bag3,Chp1,Rpl23,Rpl11,Sugt1,Rtn4,Usp19,Naa15,Flna,Mtm…
9_Member	GO Biological Processes	GO:0006457	protein folding	-21.9505	-18.9023	48/153	11632,12330,12461,12462,12464,12465,12466,12468,12469,12539,12759,12955,14228,14824,14827,14828,15481,15502,15505,15507,15516,15519,15526,18221,18415,19035,19298,19386,21454,22027,50527,52551,56351,56354,56424,56612,63958,66861,67035,67072,67738,67943,68816,70356,83945,93684,209586,230866	Aip,Canx,Cct2,Cct3,Cct4,Cct5,Cct6a,Cct7,Cct8,Cdc37,Clu,Cryab,Fkbp4,Grn,Pdia3,Hspa5,Hspa8,Dnaja1,Hsph1,Hspb1,Hsp90ab1,Hsp90aa1,Hspa9,Nudc,Hspa4l,Ppib,Pex19,Ranbp2,Tcp1,Hsp90b1,Ero1l,Sgta,Ptges3,Dnajc7,Stub1,Pfdn5,Ube4b,Dnajc10,Dnajb4,Cdc37l1,Ppid,Mesd,Ppil1,St13,Dnaja3,Selenof,Nudcd3,Emc1
9_Member	GO Biological Processes	GO:0050821	protein stabilization	-13.7239	-11.3746	40/169	11785,11806,12461,12462,12464,12465,12466,12468,12469,12539,12759,12955,13838,14682,14824,15161,15519,16784,18643,19035,19298,21454,22210,22218,22393,29810,56351,56398,65019,67025,67072,67955,68585,71472,74838,83945,192176,210376,226407,269774	Apbb1,Apoa1,Cct2,Cct3,Cct4,Cct5,Cct6a,Cct7,Cct8,Cdc37,Clu,Cryab,Epha4,Gnaq,Grn,Hcfc1,Hsp90aa1,Lamp2,Pfn1,Ppib,Pex19,Tcp1,Ube2b,Sumo1,Wfs1,Bag3,Ptges3,Chp1,Rpl23,Rpl11,Cdc37l1,Sugt1,Rtn4,Usp19,Naa15,Dnaja3,Flna,Mtmr9,Rab3gap1,Aak1
9_Member	GO Biological Processes	GO:0031647	regulation of protein stability	-13.2701	-10.9768	52/276	11785,11806,12461,12462,12464,12465,12466,12468,12469,12539,12759,12914,12955,13838,14682,14824,15161,15481,15519,16784,18643,19035,19122,19298,20362,21454,22210,22218,22258,22393,26554,29810,56351,56398,56424,65019,65114,67025,67072,67955,68585,71472,74838,83814,83945,84092,192176,210376,219158,226407,230908,269774	Apbb1,Apoa1,Cct2,Cct3,Cct4,Cct5,Cct6a,Cct7,Cct8,Cdc37,Clu,Crebbp,Cryab,Epha4,Gnaq,Grn,Hcfc1,Hspa8,Hsp90aa1,Lamp2,Pfn1,Ppib,Prnp,Pex19,Sept8,Tcp1,Ube2b,Sumo1,Usp4,Wfs1,Cul3,Bag3,Ptges3,Chp1,Stub1,Rpl23,Vps35,Rpl11,Cdc37l1,Sugt1,Rtn4,Usp19,Naa15,Nedd4l,Dnaja3,Usp8,Flna,Mtmr9,Ccar2,Rab3gap1,Tardbp,Aak1
10_Summary	GO Biological Processes	GO:0050808	synapse organization	-21.2629	-18.2409	85/453	11735,11785,11816,11820,11840,11843,11848,12262,12298,12323,12386,12387,12540,12568,13169,13838,14265,14360,14394,14395,14810,14811,14812,15387,15481,16728,17762,17918,17920,17988,17999,18164,18189,18190,18212,18222,18472,18479,18483,18643,19122,19339,19744,19878,19894,20411,22631,26875,29811,52163,53328,53872,53972,54126,54645,54725,56013,56637,56747,65114,67943,70620,71974,73178,73340,74006,756…	Ank3,Apbb1,Apoe,App,Arf1,Arf4,Rhoa,C1qc,Cacnb4,Camk2b,Ctnna2,Ctnnb1,Cdc42,Cdk5,Dbnl,Epha4,Fmr1,Fyn,Gabra1,Gabra2,Grin1,Grin2a,Grin2b,Hnrnpk,Hspa8,L1cam,Mapt,Myo5a,Myo6,Ndrg1,Nedd4,Nptx1,Nrxn1,Nrxn2,Ntrk2,Numb,Pafah1b1,Pak1,Palm,Pfn1,Prnp,Rab3a,Rheb,Rock2,Rph3a,Sorbs1,Ywhaz,Pclo,Ndrg2,Camk1,Pgrmc1,Caprin1,Ngef,Arhgef7,Gripap1,Cadm1,Srcin1,Gsk3b,Sez6l,Vps35,Mesd,Ube2v2,Prmt3,Wasl,Nptxr,Dnm1l,Chmp4b…
10_Member	GO Biological Processes	GO:0050808	synapse organization	-21.2629	-18.2409	85/453	11735,11785,11816,11820,11840,11843,11848,12262,12298,12323,12386,12387,12540,12568,13169,13838,14265,14360,14394,14395,14810,14811,14812,15387,15481,16728,17762,17918,17920,17988,17999,18164,18189,18190,18212,18222,18472,18479,18483,18643,19122,19339,19744,19878,19894,20411,22631,26875,29811,52163,53328,53872,53972,54126,54645,54725,56013,56637,56747,65114,67943,70620,71974,73178,73340,74006,756…	Ank3,Apbb1,Apoe,App,Arf1,Arf4,Rhoa,C1qc,Cacnb4,Camk2b,Ctnna2,Ctnnb1,Cdc42,Cdk5,Dbnl,Epha4,Fmr1,Fyn,Gabra1,Gabra2,Grin1,Grin2a,Grin2b,Hnrnpk,Hspa8,L1cam,Mapt,Myo5a,Myo6,Ndrg1,Nedd4,Nptx1,Nrxn1,Nrxn2,Ntrk2,Numb,Pafah1b1,Pak1,Palm,Pfn1,Prnp,Rab3a,Rheb,Rock2,Rph3a,Sorbs1,Ywhaz,Pclo,Ndrg2,Camk1,Pgrmc1,Caprin1,Ngef,Arhgef7,Gripap1,Cadm1,Srcin1,Gsk3b,Sez6l,Vps35,Mesd,Ube2v2,Prmt3,Wasl,Nptxr,Dnm1l,Chmp4b…
10_Member	GO Biological Processes	GO:0099173	postsynapse organization	-18.5853	-15.7605	50/195	11816,11840,11843,12323,12540,12568,13169,13838,14360,14810,14811,14812,15387,15481,17988,18164,18189,18190,18222,18472,19122,19744,19878,19894,20411,29811,53872,53972,54126,54725,56013,65114,67943,71974,73178,73340,74006,75608,77579,83945,103967,108100,216831,223254,234214,243725,245684,272381,319504,382253	Apoe,Arf1,Arf4,Camk2b,Cdc42,Cdk5,Dbnl,Epha4,Fyn,Grin1,Grin2a,Grin2b,Hnrnpk,Hspa8,Ndrg1,Nptx1,Nrxn1,Nrxn2,Numb,Pafah1b1,Prnp,Rheb,Rock2,Rph3a,Sorbs1,Ndrg2,Caprin1,Ngef,Arhgef7,Cadm1,Srcin1,Vps35,Mesd,Prmt3,Wasl,Nptxr,Dnm1l,Chmp4b,Myh10,Dnaja3,Dnm3,Baiap2,Arhgap44,Farp1,Sorbs2,Ppp1r9a,Cnksr2,Lrrc4b,Nrcam,Cdkl5
10_Member	GO Biological Processes	GO:0050807	regulation of synapse organization	-13.8768	-11.5165	52/267	11816,11820,11843,11848,12323,12386,12540,12568,13169,13838,14265,14360,14810,14812,15387,15481,17999,18164,18189,18212,18222,18472,19122,19744,20411,22631,52163,53328,53872,53972,54645,56013,56637,65114,67943,70620,73340,74006,75608,77579,103967,108100,208643,216831,223254,234214,235604,243725,269523,272381,319504,382253	Apoe,App,Arf4,Rhoa,Camk2b,Ctnna2,Cdc42,Cdk5,Dbnl,Epha4,Fmr1,Fyn,Grin1,Grin2b,Hnrnpk,Hspa8,Nedd4,Nptx1,Nrxn1,Ntrk2,Numb,Pafah1b1,Prnp,Rheb,Sorbs1,Ywhaz,Camk1,Pgrmc1,Caprin1,Ngef,Gripap1,Srcin1,Gsk3b,Vps35,Mesd,Ube2v2,Nptxr,Dnm1l,Chmp4b,Myh10,Dnm3,Baiap2,Eif4g1,Arhgap44,Farp1,Sorbs2,Camkv,Ppp1r9a,Vcp,Lrrc4b,Nrcam,Cdkl5
10_Member	GO Biological Processes	GO:0050803	regulation of synapse structure or activity	-13.8002	-11.4454	53/277	11816,11820,11843,11848,12323,12386,12540,12568,13169,13429,13838,14265,14360,14810,14812,15387,15481,17999,18164,18189,18212,18222,18472,19122,19744,20411,22631,52163,53328,53872,53972,54645,56013,56637,65114,67943,70620,73340,74006,75608,77579,103967,108100,208643,216831,223254,234214,235604,243725,269523,272381,319504,382253	Apoe,App,Arf4,Rhoa,Camk2b,Ctnna2,Cdc42,Cdk5,Dbnl,Dnm1,Epha4,Fmr1,Fyn,Grin1,Grin2b,Hnrnpk,Hspa8,Nedd4,Nptx1,Nrxn1,Ntrk2,Numb,Pafah1b1,Prnp,Rheb,Sorbs1,Ywhaz,Camk1,Pgrmc1,Caprin1,Ngef,Gripap1,Srcin1,Gsk3b,Vps35,Mesd,Ube2v2,Nptxr,Dnm1l,Chmp4b,Myh10,Dnm3,Baiap2,Eif4g1,Arhgap44,Farp1,Sorbs2,Camkv,Ppp1r9a,Vcp,Lrrc4b,Nrcam,Cdkl5
10_Member	GO Biological Processes	GO:0099175	regulation of postsynapse organization	-13.5508	-11.2226	34/126	11816,11843,12323,12568,13169,13838,14360,14810,14812,15387,15481,18164,18189,18222,18472,19122,19744,20411,53872,53972,56013,65114,67943,73340,74006,75608,103967,108100,216831,234214,243725,272381,319504,382253	Apoe,Arf4,Camk2b,Cdk5,Dbnl,Epha4,Fyn,Grin1,Grin2b,Hnrnpk,Hspa8,Nptx1,Nrxn1,Numb,Pafah1b1,Prnp,Rheb,Sorbs1,Caprin1,Ngef,Srcin1,Vps35,Mesd,Nptxr,Dnm1l,Chmp4b,Dnm3,Baiap2,Arhgap44,Sorbs2,Ppp1r9a,Lrrc4b,Nrcam,Cdkl5
10_Member	GO Biological Processes	GO:0060996	dendritic spine development	-13.2046	-10.9207	33/122	11816,11840,11843,12322,12323,12540,12568,13169,13196,13690,13838,14265,14815,14824,15182,15387,18472,18479,18483,52163,53872,53972,56013,71974,73178,74006,103967,108100,216831,216963,224105,243725,382253	Apoe,Arf1,Arf4,Camk2a,Camk2b,Cdc42,Cdk5,Dbnl,Asap1,Eif4g2,Epha4,Fmr1,Nr3c1,Grn,Hdac2,Hnrnpk,Pafah1b1,Pak1,Palm,Camk1,Caprin1,Ngef,Srcin1,Prmt3,Wasl,Dnm1l,Dnm3,Baiap2,Arhgap44,Git1,Pak2,Ppp1r9a,Cdkl5
10_Member	GO Biological Processes	GO:0106027	neuron projection organization	-10.6863	-8.64871	27/102	11816,11820,11840,12323,12540,12568,13169,13838,14360,14810,14811,14812,18472,19122,19894,53872,53972,56013,56637,65114,71974,73178,74006,103967,108100,216831,243725	Apoe,App,Arf1,Camk2b,Cdc42,Cdk5,Dbnl,Epha4,Fyn,Grin1,Grin2a,Grin2b,Pafah1b1,Prnp,Rph3a,Caprin1,Ngef,Srcin1,Gsk3b,Vps35,Prmt3,Wasl,Dnm1l,Dnm3,Baiap2,Arhgap44,Ppp1r9a
10_Member	GO Biological Processes	GO:0060998	regulation of dendritic spine development	-10.2136	-8.21165	25/92	11816,11840,12323,12568,13169,13196,13690,13838,14265,14815,14824,15182,15387,18472,18483,52163,53872,53972,56013,74006,103967,108100,216831,243725,382253	Apoe,Arf1,Camk2b,Cdk5,Dbnl,Asap1,Eif4g2,Epha4,Fmr1,Nr3c1,Grn,Hdac2,Hnrnpk,Pafah1b1,Palm,Camk1,Caprin1,Ngef,Srcin1,Dnm1l,Dnm3,Baiap2,Arhgap44,Ppp1r9a,Cdkl5
10_Member	GO Biological Processes	GO:0097061	dendritic spine organization	-9.99254	-8.00496	25/94	11816,11840,12323,12540,12568,13169,13838,14360,14810,14811,14812,18472,19122,19894,53872,53972,56013,65114,71974,73178,74006,103967,108100,216831,243725	Apoe,Arf1,Camk2b,Cdc42,Cdk5,Dbnl,Epha4,Fyn,Grin1,Grin2a,Grin2b,Pafah1b1,Prnp,Rph3a,Caprin1,Ngef,Srcin1,Vps35,Prmt3,Wasl,Dnm1l,Dnm3,Baiap2,Arhgap44,Ppp1r9a
10_Member	GO Biological Processes	GO:1900006	positive regulation of dendrite development	-7.92169	-6.08967	24/108	11816,11840,12323,13169,13690,13838,14265,14815,14824,15387,15572,16202,18222,18472,18483,23969,52163,53872,74006,76454,108100,216344,243725,382253	Apoe,Arf1,Camk2b,Dbnl,Eif4g2,Epha4,Fmr1,Nr3c1,Grn,Hnrnpk,Elavl4,Ilk,Numb,Pafah1b1,Palm,Pacsin1,Camk1,Caprin1,Dnm1l,Fbxo31,Baiap2,Rab21,Ppp1r9a,Cdkl5
10_Member	GO Biological Processes	GO:0060999	positive regulation of dendritic spine development	-7.10421	-5.34736	17/63	11816,11840,12323,13169,13690,14265,14815,14824,15387,18472,18483,52163,53872,74006,108100,243725,382253	Apoe,Arf1,Camk2b,Dbnl,Eif4g2,Fmr1,Nr3c1,Grn,Hnrnpk,Pafah1b1,Palm,Camk1,Caprin1,Dnm1l,Baiap2,Ppp1r9a,Cdkl5
10_Member	GO Biological Processes	GO:0060997	dendritic spine morphogenesis	-5.75542	-4.17328	16/69	12323,12540,12568,13169,13838,18472,53872,53972,56013,71974,73178,74006,103967,108100,216831,243725	Camk2b,Cdc42,Cdk5,Dbnl,Epha4,Pafah1b1,Caprin1,Ngef,Srcin1,Prmt3,Wasl,Dnm1l,Dnm3,Baiap2,Arhgap44,Ppp1r9a
10_Member	GO Biological Processes	GO:0061001	regulation of dendritic spine morphogenesis	-5.27473	-3.74743	13/51	12323,12568,13169,13838,18472,53872,53972,56013,74006,103967,108100,216831,243725	Camk2b,Cdk5,Dbnl,Epha4,Pafah1b1,Caprin1,Ngef,Srcin1,Dnm1l,Dnm3,Baiap2,Arhgap44,Ppp1r9a
10_Member	GO Biological Processes	GO:0050775	positive regulation of dendrite morphogenesis	-4.18641	-2.79376	12/55	12323,13169,13838,16202,18222,18472,53872,74006,76454,108100,216344,382253	Camk2b,Dbnl,Epha4,Ilk,Numb,Pafah1b1,Caprin1,Dnm1l,Fbxo31,Baiap2,Rab21,Cdkl5
10_Member	GO Biological Processes	GO:0061003	positive regulation of dendritic spine morphogenesis	-2.38855	-1.2921	6/27	12323,13169,18472,53872,74006,108100	Camk2b,Dbnl,Pafah1b1,Caprin1,Dnm1l,Baiap2
11_Summary	GO Biological Processes	GO:0072657	protein localization to membrane	-19.74	-16.83	92/544	11651,11735,11773,11776,11816,12215,12306,12322,12323,12325,12568,12876,12889,12995,13823,13829,14360,14567,14810,14811,14812,14828,15444,15519,15525,16480,16971,17918,18164,18189,18190,18195,18222,18412,18479,18483,18607,19122,19298,19326,19339,19684,19878,20280,20334,20411,20614,23969,26395,26414,27643,30055,52250,52551,53310,53328,53612,54645,56350,56430,56637,65114,66661,67295,67826,67943,702…	Akt1,Ank3,Ap2m1,Ap3d1,Apoe,Bsg,Anxa2,Camk2a,Camk2b,Camk2g,Cdk5,Cpe,Cplx1,Csnk2a1,Epb41l3,Dmtn,Fyn,Gdi1,Grin1,Grin2a,Grin2b,Hspa5,Hpca,Hsp90aa1,Hspa4,Jup,Lrp1,Myo5a,Nptx1,Nrxn1,Nrxn2,Nsf,Numb,Sqstm1,Pak1,Palm,Pdpk1,Prnp,Pex19,Rab11b,Rab3a,Rdx,Rock2,Scp2,Sec23a,Sorbs1,Snap25,Pacsin1,Map2k1,Mapk10,Ubl4a,Timm13,Reep1,Sgta,Dlg3,Pgrmc1,Vti1b,Gripap1,Arl3,Clip1,Gsk3b,Vps35,Srp72,Rab3c,Snap47,Mesd,Gorasp…
11_Member	GO Biological Processes	GO:0072657	protein localization to membrane	-19.74	-16.83	92/544	11651,11735,11773,11776,11816,12215,12306,12322,12323,12325,12568,12876,12889,12995,13823,13829,14360,14567,14810,14811,14812,14828,15444,15519,15525,16480,16971,17918,18164,18189,18190,18195,18222,18412,18479,18483,18607,19122,19298,19326,19339,19684,19878,20280,20334,20411,20614,23969,26395,26414,27643,30055,52250,52551,53310,53328,53612,54645,56350,56430,56637,65114,66661,67295,67826,67943,702…	Akt1,Ank3,Ap2m1,Ap3d1,Apoe,Bsg,Anxa2,Camk2a,Camk2b,Camk2g,Cdk5,Cpe,Cplx1,Csnk2a1,Epb41l3,Dmtn,Fyn,Gdi1,Grin1,Grin2a,Grin2b,Hspa5,Hpca,Hsp90aa1,Hspa4,Jup,Lrp1,Myo5a,Nptx1,Nrxn1,Nrxn2,Nsf,Numb,Sqstm1,Pak1,Palm,Pdpk1,Prnp,Pex19,Rab11b,Rab3a,Rdx,Rock2,Scp2,Sec23a,Sorbs1,Snap25,Pacsin1,Map2k1,Mapk10,Ubl4a,Timm13,Reep1,Sgta,Dlg3,Pgrmc1,Vti1b,Gripap1,Arl3,Clip1,Gsk3b,Vps35,Srp72,Rab3c,Snap47,Mesd,Gorasp…
11_Member	GO Biological Processes	GO:1990778	protein localization to cell periphery	-15.9206	-13.3403	64/344	11651,11735,11773,12215,12306,12322,12323,12325,12568,12889,12995,13823,14677,14810,14811,16480,16971,17918,18164,18189,18195,18222,18412,18483,18607,19122,19339,19684,19878,20280,20334,20411,20614,23969,26395,26414,53328,53612,54645,56350,56430,56637,65114,67295,67826,70231,72621,72993,73340,76089,76499,80297,80334,101706,106039,192176,213760,216831,216963,217124,234678,242274,665113,668212	Akt1,Ank3,Ap2m1,Bsg,Anxa2,Camk2a,Camk2b,Camk2g,Cdk5,Cplx1,Csnk2a1,Epb41l3,Gnai1,Grin1,Grin2a,Jup,Lrp1,Myo5a,Nptx1,Nrxn1,Nsf,Numb,Sqstm1,Palm,Pdpk1,Prnp,Rab3a,Rdx,Rock2,Scp2,Sec23a,Sorbs1,Snap25,Pacsin1,Map2k1,Mapk10,Pgrmc1,Vti1b,Gripap1,Arl3,Clip1,Gsk3b,Vps35,Rab3c,Snap47,Gorasp2,Pdzd11,Appl1,Nptxr,Rapgef2,Clasp2,Sptbn4,Kcnip4,Numa1,Gga1,Flna,Prepl,Arhgap44,Git1,Ppp1r9b,D230025D16Rik,Lrrc7,Tnik,E…
11_Member	GO Biological Processes	GO:0072659	protein localization to plasma membrane	-10.8131	-8.75933	48/279	11651,11735,11773,12215,12306,12322,12323,12325,12568,12995,13823,16480,16971,17918,18189,18195,18222,18412,18483,18607,19122,19339,19684,19878,20280,20334,20411,23969,53328,53612,54645,65114,67295,70231,72993,76089,76499,80297,80334,106039,192176,213760,216831,217124,234678,242274,665113,668212	Akt1,Ank3,Ap2m1,Bsg,Anxa2,Camk2a,Camk2b,Camk2g,Cdk5,Csnk2a1,Epb41l3,Jup,Lrp1,Myo5a,Nrxn1,Nsf,Numb,Sqstm1,Palm,Pdpk1,Prnp,Rab3a,Rdx,Rock2,Scp2,Sec23a,Sorbs1,Pacsin1,Pgrmc1,Vti1b,Gripap1,Vps35,Rab3c,Gorasp2,Appl1,Rapgef2,Clasp2,Sptbn4,Kcnip4,Gga1,Flna,Prepl,Arhgap44,Ppp1r9b,D230025D16Rik,Lrrc7,Tnik,Efr3b
11_Member	GO Biological Processes	GO:1905475	regulation of protein localization to membrane	-7.92045	-6.08967	33/187	11651,11735,11773,12322,12323,12325,12568,12995,13829,14360,14567,15444,16971,17918,18189,18222,18412,18479,18607,19122,20411,26395,53328,53612,54645,56637,67943,72993,108155,216831,217124,234214,665113	Akt1,Ank3,Ap2m1,Camk2a,Camk2b,Camk2g,Cdk5,Csnk2a1,Dmtn,Fyn,Gdi1,Hpca,Lrp1,Myo5a,Nrxn1,Numb,Sqstm1,Pak1,Pdpk1,Prnp,Sorbs1,Map2k1,Pgrmc1,Vti1b,Gripap1,Gsk3b,Mesd,Appl1,Ogt,Arhgap44,Ppp1r9b,Sorbs2,Tnik
11_Member	GO Biological Processes	GO:1904375	regulation of protein localization to cell periphery	-7.23421	-5.4647	26/134	11651,11773,12322,12323,12325,12568,12995,14677,16971,17918,18189,18222,18412,18607,19122,20411,26395,53328,53612,54645,56637,72993,101706,216831,217124,665113	Akt1,Ap2m1,Camk2a,Camk2b,Camk2g,Cdk5,Csnk2a1,Gnai1,Lrp1,Myo5a,Nrxn1,Numb,Sqstm1,Pdpk1,Prnp,Sorbs1,Map2k1,Pgrmc1,Vti1b,Gripap1,Gsk3b,Appl1,Numa1,Arhgap44,Ppp1r9b,Tnik
11_Member	GO Biological Processes	GO:1903076	regulation of protein localization to plasma membrane	-5.91633	-4.31522	21/109	11651,11773,12322,12323,12325,12568,12995,16971,17918,18189,18222,18412,18607,19122,20411,53328,53612,54645,72993,216831,217124	Akt1,Ap2m1,Camk2a,Camk2b,Camk2g,Cdk5,Csnk2a1,Lrp1,Myo5a,Nrxn1,Numb,Sqstm1,Pdpk1,Prnp,Sorbs1,Pgrmc1,Vti1b,Gripap1,Appl1,Arhgap44,Ppp1r9b
11_Member	GO Biological Processes	GO:1905477	positive regulation of protein localization to membrane	-3.50073	-2.20113	16/103	11651,11735,12568,14360,15444,16971,17918,18189,18412,18479,18607,19122,20411,53328,67943,217124	Akt1,Ank3,Cdk5,Fyn,Hpca,Lrp1,Myo5a,Nrxn1,Sqstm1,Pak1,Pdpk1,Prnp,Sorbs1,Pgrmc1,Mesd,Ppp1r9b
11_Member	GO Biological Processes	GO:1904377	positive regulation of protein localization to cell periphery	-3.39486	-2.11854	12/66	11651,14677,16971,17918,18189,18412,18607,19122,20411,53328,101706,217124	Akt1,Gnai1,Lrp1,Myo5a,Nrxn1,Sqstm1,Pdpk1,Prnp,Sorbs1,Pgrmc1,Numa1,Ppp1r9b
11_Member	GO Biological Processes	GO:1903078	positive regulation of protein localization to plasma membrane	-2.67972	-1.5277	10/59	11651,16971,17918,18189,18412,18607,19122,20411,53328,217124	Akt1,Lrp1,Myo5a,Nrxn1,Sqstm1,Pdpk1,Prnp,Sorbs1,Pgrmc1,Ppp1r9b
12_Summary	GO Biological Processes	GO:0016050	vesicle organization	-16.3699	-13.7408	55/259	11773,11774,11776,11840,12306,12889,12890,13429,18412,18472,18571,19339,19344,19349,20334,20362,20479,20614,20661,20720,20971,20981,22088,22317,26554,30960,53612,54198,54525,56041,56491,66251,66508,67474,67826,67898,68365,68581,69017,71732,73178,77038,80743,84092,84095,99371,99683,102058,103967,104015,110380,218811,241727,271457,360013,11651,11735,11750,11816,11848,11938,12322,12527,12759,13196,1…	Ap2m1,Ap3b1,Ap3d1,Arf1,Anxa2,Cplx1,Cplx2,Dnm1,Sqstm1,Pafah1b1,Pdcd6ip,Rab3a,Rab5b,Rab7,Sec23a,Sept8,Vps4b,Snap25,Sort1,Serpine2,Sdc4,Syt3,Tsg101,Vamp1,Cul3,Vapa,Vti1b,Snx3,Syt7,Uso1,Vapb,Arfgap3,Lamtor1,Snap29,Snap47,Pef1,Rab14,Tmed10,Prrt2,Vps11,Wasl,Arfgap2,Vps16,Usp8,Pi4k2a,Arfgef2,Sec24b,Exoc8,Dnm3,Synj1,Shroom2,Sec24c,Snph,Rab5a,Myo18a,Akt1,Ank3,Anxa7,Apoe,Rhoa,Atp2a2,Camk2a,Cd9,Clu,Asap1,Ep…
12_Member	GO Biological Processes	GO:0016050	vesicle organization	-16.3699	-13.7408	55/259	11773,11774,11776,11840,12306,12889,12890,13429,18412,18472,18571,19339,19344,19349,20334,20362,20479,20614,20661,20720,20971,20981,22088,22317,26554,30960,53612,54198,54525,56041,56491,66251,66508,67474,67826,67898,68365,68581,69017,71732,73178,77038,80743,84092,84095,99371,99683,102058,103967,104015,110380,218811,241727,271457,360013	Ap2m1,Ap3b1,Ap3d1,Arf1,Anxa2,Cplx1,Cplx2,Dnm1,Sqstm1,Pafah1b1,Pdcd6ip,Rab3a,Rab5b,Rab7,Sec23a,Sept8,Vps4b,Snap25,Sort1,Serpine2,Sdc4,Syt3,Tsg101,Vamp1,Cul3,Vapa,Vti1b,Snx3,Syt7,Uso1,Vapb,Arfgap3,Lamtor1,Snap29,Snap47,Pef1,Rab14,Tmed10,Prrt2,Vps11,Wasl,Arfgap2,Vps16,Usp8,Pi4k2a,Arfgef2,Sec24b,Exoc8,Dnm3,Synj1,Shroom2,Sec24c,Snph,Rab5a,Myo18a
12_Member	GO Biological Processes	GO:0061024	membrane organization	-10.6477	-8.61806	94/783	11651,11735,11750,11773,11774,11776,11816,11840,11848,11938,12306,12322,12527,12759,12889,12890,13196,13429,13823,15481,15519,15525,17886,17988,18189,18190,18472,18571,18671,19063,19156,19339,19349,20334,20362,20411,20479,20614,20981,22317,23969,26414,26554,27643,30055,30960,52250,52551,53612,54198,54525,54645,56041,56298,56398,56430,56491,56637,59040,65114,66098,66251,67474,67826,67898,67943,685…	Akt1,Ank3,Anxa7,Ap2m1,Ap3b1,Ap3d1,Apoe,Arf1,Rhoa,Atp2a2,Anxa2,Camk2a,Cd9,Clu,Cplx1,Cplx2,Asap1,Dnm1,Epb41l3,Hspa8,Hsp90aa1,Hspa4,Myh9,Ndrg1,Nrxn1,Nrxn2,Pafah1b1,Pdcd6ip,Abcb1a,Ppt1,Psap,Rab3a,Rab7,Sec23a,Sept8,Sorbs1,Vps4b,Snap25,Syt3,Vamp1,Pacsin1,Mapk10,Cul3,Ubl4a,Timm13,Vapa,Reep1,Sgta,Vti1b,Snx3,Syt7,Gripap1,Uso1,Atl2,Chp1,Clip1,Vapb,Gsk3b,Rhot1,Vps35,Chchd6,Arfgap3,Snap29,Snap47,Pef1,Mesd,Tm…
13_Summary	GO Biological Processes	GO:0042176	regulation of protein catabolic process	-16.0976	-13.4787	68/378	11651,11789,11816,12306,12759,12995,13010,13121,13194,13838,14265,14360,14609,14811,15516,15519,16971,17698,17999,18195,18747,18752,19052,19188,19229,19349,19359,19684,20720,21762,22123,22218,26419,52551,54198,54418,54609,55988,56207,56424,56440,56637,56736,59025,59029,65019,65114,66753,66914,67025,69807,70247,70620,71472,71732,83814,84092,93687,93739,99375,106039,108155,192176,208092,219158,2249…	Akt1,Apc,Apoe,Anxa2,Clu,Csnk2a1,Cst3,Cyp51,Ddb1,Epha4,Fmr1,Fyn,Gja1,Grin2a,Hsp90ab1,Hsp90aa1,Lrp1,Msn,Nedd4,Nsf,Prkaca,Prkcg,Ppp2ca,Psme2,Ptk2b,Rab7,Rad23b,Rdx,Serpine2,Psmd2,Psmd3,Sumo1,Mapk8,Sgta,Snx3,Fmn2,Ubqln2,Snx12,Uchl5,Stub1,Snx1,Gsk3b,Rnf14,Usp14,Psmd14,Rpl23,Vps35,Erlec1,Vps28,Rpl11,Trim32,Psmd1,Ube2v2,Usp19,Vps11,Nedd4l,Usp8,Csnk1a1,Gabarapl2,Cul4a,Gga1,Ogt,Flna,Chmp6,Ccar2,Dlgap1,Ubxn…
13_Member	GO Biological Processes	GO:0042176	regulation of protein catabolic process	-16.0976	-13.4787	68/378	11651,11789,11816,12306,12759,12995,13010,13121,13194,13838,14265,14360,14609,14811,15516,15519,16971,17698,17999,18195,18747,18752,19052,19188,19229,19349,19359,19684,20720,21762,22123,22218,26419,52551,54198,54418,54609,55988,56207,56424,56440,56637,56736,59025,59029,65019,65114,66753,66914,67025,69807,70247,70620,71472,71732,83814,84092,93687,93739,99375,106039,108155,192176,208092,219158,2249…	Akt1,Apc,Apoe,Anxa2,Clu,Csnk2a1,Cst3,Cyp51,Ddb1,Epha4,Fmr1,Fyn,Gja1,Grin2a,Hsp90ab1,Hsp90aa1,Lrp1,Msn,Nedd4,Nsf,Prkaca,Prkcg,Ppp2ca,Psme2,Ptk2b,Rab7,Rad23b,Rdx,Serpine2,Psmd2,Psmd3,Sumo1,Mapk8,Sgta,Snx3,Fmn2,Ubqln2,Snx12,Uchl5,Stub1,Snx1,Gsk3b,Rnf14,Usp14,Psmd14,Rpl23,Vps35,Erlec1,Vps28,Rpl11,Trim32,Psmd1,Ube2v2,Usp19,Vps11,Nedd4l,Usp8,Csnk1a1,Gabarapl2,Cul4a,Gga1,Ogt,Flna,Chmp6,Ccar2,Dlgap1,Ubxn…
13_Member	GO Biological Processes	GO:0031329	regulation of cellular catabolic process	-12.4322	-10.2517	91/695	11651,11808,11816,11820,12306,12492,12539,12759,12894,12995,13010,13211,13690,13838,14265,15381,15516,15519,15572,16549,16971,17698,17762,17876,18458,18475,18747,18752,19045,19046,19188,19229,19317,19359,19684,19704,19878,22218,22224,22608,23879,26395,26417,26419,29810,51810,52551,54609,56207,56403,56424,56637,56736,59025,59029,59092,65019,65114,66753,67025,67412,67839,70620,71472,71732,72416,731…	Akt1,Apoa4,Apoe,App,Anxa2,Scarb2,Cdc37,Clu,Cpt1a,Csnk2a1,Cst3,Dhx9,Eif4g2,Epha4,Fmr1,Hnrnpc,Hsp90ab1,Hsp90aa1,Elavl4,Khsrp,Lrp1,Msn,Mapt,Myef2,Pabpc1,Pafah1b2,Prkaca,Prkcg,Ppp1ca,Ppp1cb,Psme2,Ptk2b,Qk,Rad23b,Rdx,Upf1,Rock2,Sumo1,Usp10,Ybx1,Fxr2,Map2k1,Mapk3,Mapk8,Bag3,Hnrnpu,Sgta,Ubqln2,Uchl5,Syncrip,Stub1,Gsk3b,Rnf14,Usp14,Psmd14,Pcbp4,Rpl23,Vps35,Erlec1,Rpl11,Soga3,Gpsm1,Ube2v2,Usp19,Vps11,Lrpp…
13_Member	GO Biological Processes	GO:1903362	regulation of cellular protein catabolic process	-9.29178	-7.35082	41/239	11651,11816,12306,12759,12995,13838,14265,15516,15519,16971,17698,18747,18752,19188,19229,19359,19684,22218,26419,52551,54609,56207,56424,56637,56736,59025,59029,65019,65114,66753,67025,70620,71472,71732,93687,93739,108155,219158,224997,225896,269523	Akt1,Apoe,Anxa2,Clu,Csnk2a1,Epha4,Fmr1,Hsp90ab1,Hsp90aa1,Lrp1,Msn,Prkaca,Prkcg,Psme2,Ptk2b,Rad23b,Rdx,Sumo1,Mapk8,Sgta,Ubqln2,Uchl5,Stub1,Gsk3b,Rnf14,Usp14,Psmd14,Rpl23,Vps35,Erlec1,Rpl11,Ube2v2,Usp19,Vps11,Csnk1a1,Gabarapl2,Ogt,Ccar2,Dlgap1,Ubxn1,Vcp
13_Member	GO Biological Processes	GO:0009896	positive regulation of catabolic process	-8.06332	-6.21576	56/422	11651,11789,11808,11816,11820,12539,12759,12894,12995,13194,14265,14609,15519,16549,16971,17698,17999,18195,18458,18475,18754,19229,19317,19349,19684,19704,19878,22218,26395,26417,26419,29810,52551,54609,56424,56440,56637,56736,65114,66914,67839,69807,70620,71732,73158,74326,83814,93687,98732,99375,106039,117150,213541,216963,226407,269523	Akt1,Apc,Apoa4,Apoe,App,Cdc37,Clu,Cpt1a,Csnk2a1,Ddb1,Fmr1,Gja1,Hsp90aa1,Khsrp,Lrp1,Msn,Nedd4,Nsf,Pabpc1,Pafah1b2,Prkce,Ptk2b,Qk,Rab7,Rdx,Upf1,Rock2,Sumo1,Map2k1,Mapk3,Mapk8,Bag3,Sgta,Ubqln2,Stub1,Snx1,Gsk3b,Rnf14,Vps35,Vps28,Gpsm1,Trim32,Ube2v2,Vps11,Larp1,Hnrnpr,Nedd4l,Csnk1a1,Rab3gap2,Cul4a,Gga1,Pip4k2c,Ythdf2,Git1,Rab3gap1,Vcp
13_Member	GO Biological Processes	GO:1903050	regulation of proteolysis involved in cellular protein catabolic process	-7.28273	-5.5089	34/208	11651,11816,12759,12995,13838,14265,15516,18747,18752,19188,19229,19359,22218,26419,52551,54609,56207,56424,56637,56736,59025,59029,65019,66753,67025,70620,71472,93687,93739,108155,219158,224997,225896,269523	Akt1,Apoe,Clu,Csnk2a1,Epha4,Fmr1,Hsp90ab1,Prkaca,Prkcg,Psme2,Ptk2b,Rad23b,Sumo1,Mapk8,Sgta,Ubqln2,Uchl5,Stub1,Gsk3b,Rnf14,Usp14,Psmd14,Rpl23,Erlec1,Rpl11,Ube2v2,Usp19,Csnk1a1,Gabarapl2,Ogt,Ccar2,Dlgap1,Ubxn1,Vcp
13_Member	GO Biological Processes	GO:0045732	positive regulation of protein catabolic process	-7.17825	-5.413	34/210	11651,11789,11816,12759,12995,13194,14265,14609,15519,16971,17698,17999,18195,19229,19349,19684,22218,26419,52551,54609,56424,56440,56637,56736,65114,66914,69807,70620,71732,83814,93687,99375,106039,269523	Akt1,Apc,Apoe,Clu,Csnk2a1,Ddb1,Fmr1,Gja1,Hsp90aa1,Lrp1,Msn,Nedd4,Nsf,Ptk2b,Rab7,Rdx,Sumo1,Mapk8,Sgta,Ubqln2,Stub1,Snx1,Gsk3b,Rnf14,Vps35,Vps28,Trim32,Ube2v2,Vps11,Nedd4l,Csnk1a1,Cul4a,Gga1,Vcp
13_Member	GO Biological Processes	GO:0061136	regulation of proteasomal protein catabolic process	-6.80254	-5.09048	30/178	11651,11816,12759,14265,15516,18747,18752,19188,19359,22218,26419,52551,54609,56207,56424,56637,56736,59025,59029,66753,67025,70620,71472,93687,93739,108155,219158,224997,225896,269523	Akt1,Apoe,Clu,Fmr1,Hsp90ab1,Prkaca,Prkcg,Psme2,Rad23b,Sumo1,Mapk8,Sgta,Ubqln2,Uchl5,Stub1,Gsk3b,Rnf14,Usp14,Psmd14,Erlec1,Rpl11,Ube2v2,Usp19,Csnk1a1,Gabarapl2,Ogt,Ccar2,Dlgap1,Ubxn1,Vcp
13_Member	GO Biological Processes	GO:0031331	positive regulation of cellular catabolic process	-4.92387	-3.43491	42/355	11651,11808,11816,11820,12539,12759,12894,14265,15519,16549,16971,17698,18458,18475,19229,19317,19684,19704,19878,22218,26395,26417,26419,29810,52551,54609,56424,56637,56736,65114,67839,70620,71732,73158,74326,93687,98732,117150,213541,216963,226407,269523	Akt1,Apoa4,Apoe,App,Cdc37,Clu,Cpt1a,Fmr1,Hsp90aa1,Khsrp,Lrp1,Msn,Pabpc1,Pafah1b2,Ptk2b,Qk,Rdx,Upf1,Rock2,Sumo1,Map2k1,Mapk3,Mapk8,Bag3,Sgta,Ubqln2,Stub1,Gsk3b,Rnf14,Vps35,Gpsm1,Ube2v2,Vps11,Larp1,Hnrnpr,Csnk1a1,Rab3gap2,Pip4k2c,Ythdf2,Git1,Rab3gap1,Vcp
13_Member	GO Biological Processes	GO:2000058	regulation of ubiquitin-dependent protein catabolic process	-4.71988	-3.26198	23/149	11651,12759,12995,15516,19229,19359,22218,26419,52551,54609,56207,56424,56637,56736,59025,65019,67025,70620,93687,108155,219158,225896,269523	Akt1,Clu,Csnk2a1,Hsp90ab1,Ptk2b,Rad23b,Sumo1,Mapk8,Sgta,Ubqln2,Uchl5,Stub1,Gsk3b,Rnf14,Usp14,Rpl23,Rpl11,Ube2v2,Csnk1a1,Ogt,Ccar2,Ubxn1,Vcp
13_Member	GO Biological Processes	GO:0032434	regulation of proteasomal ubiquitin-dependent protein catabolic process	-4.51662	-3.08443	20/123	11651,12759,15516,19359,22218,26419,52551,54609,56207,56424,56637,56736,59025,67025,70620,93687,108155,219158,225896,269523	Akt1,Clu,Hsp90ab1,Rad23b,Sumo1,Mapk8,Sgta,Ubqln2,Uchl5,Stub1,Gsk3b,Rnf14,Usp14,Rpl11,Ube2v2,Csnk1a1,Ogt,Ccar2,Ubxn1,Vcp
13_Member	GO Biological Processes	GO:1903364	positive regulation of cellular protein catabolic process	-4.4148	-2.99171	21/135	11651,11816,12759,14265,15519,16971,17698,19229,19684,22218,26419,52551,54609,56424,56637,56736,65114,70620,71732,93687,269523	Akt1,Apoe,Clu,Fmr1,Hsp90aa1,Lrp1,Msn,Ptk2b,Rdx,Sumo1,Mapk8,Sgta,Ubqln2,Stub1,Gsk3b,Rnf14,Vps35,Ube2v2,Vps11,Csnk1a1,Vcp
13_Member	GO Biological Processes	GO:0032436	positive regulation of proteasomal ubiquitin-dependent protein catabolic process	-2.49774	-1.376	12/83	11651,12759,22218,26419,52551,54609,56424,56637,56736,70620,93687,269523	Akt1,Clu,Sumo1,Mapk8,Sgta,Ubqln2,Stub1,Gsk3b,Rnf14,Ube2v2,Csnk1a1,Vcp
13_Member	GO Biological Processes	GO:2000060	positive regulation of ubiquitin-dependent protein catabolic process	-2.48766	-1.36753	13/94	11651,12759,19229,22218,26419,52551,54609,56424,56637,56736,70620,93687,269523	Akt1,Clu,Ptk2b,Sumo1,Mapk8,Sgta,Ubqln2,Stub1,Gsk3b,Rnf14,Ube2v2,Csnk1a1,Vcp
13_Member	GO Biological Processes	GO:1901800	positive regulation of proteasomal protein catabolic process	-2.14673	-1.09873	13/103	11651,12759,14265,22218,26419,52551,54609,56424,56637,56736,70620,93687,269523	Akt1,Clu,Fmr1,Sumo1,Mapk8,Sgta,Ubqln2,Stub1,Gsk3b,Rnf14,Ube2v2,Csnk1a1,Vcp
13_Member	GO Biological Processes	GO:1903052	positive regulation of proteolysis involved in cellular protein catabolic process	-2.10085	-1.0633	14/116	11651,12759,14265,19229,22218,26419,52551,54609,56424,56637,56736,70620,93687,269523	Akt1,Clu,Fmr1,Ptk2b,Sumo1,Mapk8,Sgta,Ubqln2,Stub1,Gsk3b,Rnf14,Ube2v2,Csnk1a1,Vcp
14_Summary	GO Biological Processes	GO:0006518	peptide metabolic process	-16.0623	-13.4533	108/789	11428,11651,11803,11816,11820,12759,12876,13205,13211,13494,13495,13627,13628,13629,13665,13669,13681,13682,13684,13690,13838,14109,14265,14651,14852,14862,14866,15115,15388,15481,15572,16201,16210,16341,16549,16784,16785,16993,17975,18484,18813,19045,19122,19155,19229,19317,19652,19704,19878,19941,20218,20226,20394,20918,22375,22384,23879,24015,26413,26417,26905,27367,27370,27979,29810,53817,538…	Aco1,Akt1,Aplp1,Apoe,App,Clu,Cpe,Ddx3x,Dhx9,Drg1,Drg2,Eef1a1,Eef1a2,Eef2,Eif2s1,Eif3a,Eif4a1,Eif4a2,Eif4e,Eif4g2,Epha4,Fau,Fmr1,Hagh,Gspt1,Gstm1,Gstm5,Hars,Hnrnpl,Hspa8,Elavl4,Ilf3,Impact,Eif3e,Khsrp,Lamp2,Rpsa,Lta4h,Ncl,Pam,Pa2g4,Ppp1ca,Prnp,Npepps,Ptk2b,Qk,Rbm3,Upf1,Rock2,Rpl26,Khdrbs1,Sars,Scg5,Eif1,Wars,Eif4h,Fxr2,Abce1,Mapk1,Mapk3,Eif2s3x,Rpl3,Rps26,Eif3b,Bag3,Ddx39b,Caprin1,Eif3i,Eif3d,Rplp…
14_Member	GO Biological Processes	GO:0006518	peptide metabolic process	-16.0623	-13.4533	108/789	11428,11651,11803,11816,11820,12759,12876,13205,13211,13494,13495,13627,13628,13629,13665,13669,13681,13682,13684,13690,13838,14109,14265,14651,14852,14862,14866,15115,15388,15481,15572,16201,16210,16341,16549,16784,16785,16993,17975,18484,18813,19045,19122,19155,19229,19317,19652,19704,19878,19941,20218,20226,20394,20918,22375,22384,23879,24015,26413,26417,26905,27367,27370,27979,29810,53817,538…	Aco1,Akt1,Aplp1,Apoe,App,Clu,Cpe,Ddx3x,Dhx9,Drg1,Drg2,Eef1a1,Eef1a2,Eef2,Eif2s1,Eif3a,Eif4a1,Eif4a2,Eif4e,Eif4g2,Epha4,Fau,Fmr1,Hagh,Gspt1,Gstm1,Gstm5,Hars,Hnrnpl,Hspa8,Elavl4,Ilf3,Impact,Eif3e,Khsrp,Lamp2,Rpsa,Lta4h,Ncl,Pam,Pa2g4,Ppp1ca,Prnp,Npepps,Ptk2b,Qk,Rbm3,Upf1,Rock2,Rpl26,Khdrbs1,Sars,Scg5,Eif1,Wars,Eif4h,Fxr2,Abce1,Mapk1,Mapk3,Eif2s3x,Rpl3,Rps26,Eif3b,Bag3,Ddx39b,Caprin1,Eif3i,Eif3d,Rplp…
14_Member	GO Biological Processes	GO:0006412	translation	-14.7346	-12.2884	89/615	11428,11651,11803,11820,13205,13211,13494,13495,13627,13628,13629,13665,13669,13681,13682,13684,13690,14109,14265,14852,15115,15388,15572,16201,16210,16341,16549,16785,17975,18813,19045,19229,19317,19652,19704,19878,19941,20218,20226,20918,22375,22384,23879,24015,26413,26417,26905,27367,27370,27979,53817,53872,54709,55944,56040,56347,56403,56541,65019,66085,66235,66590,66656,67025,67186,68135,681…	Aco1,Akt1,Aplp1,App,Ddx3x,Dhx9,Drg1,Drg2,Eef1a1,Eef1a2,Eef2,Eif2s1,Eif3a,Eif4a1,Eif4a2,Eif4e,Eif4g2,Fau,Fmr1,Gspt1,Hars,Hnrnpl,Elavl4,Ilf3,Impact,Eif3e,Khsrp,Rpsa,Ncl,Pa2g4,Ppp1ca,Ptk2b,Qk,Rbm3,Upf1,Rock2,Rpl26,Khdrbs1,Sars,Eif1,Wars,Eif4h,Fxr2,Abce1,Mapk1,Mapk3,Eif2s3x,Rpl3,Rps26,Eif3b,Ddx39b,Caprin1,Eif3i,Eif3d,Rplp1,Eif3c,Syncrip,Habp4,Rpl23,Eif3f,Eif1ax,Farsa,Eef1d,Rpl11,Rplp2,Eif3h,Rpl24,Lrp…
14_Member	GO Biological Processes	GO:0043043	peptide biosynthetic process	-14.2565	-11.8554	90/637	11428,11651,11803,11820,13205,13211,13494,13495,13627,13628,13629,13665,13669,13681,13682,13684,13690,14109,14265,14651,14852,15115,15388,15572,16201,16210,16341,16549,16785,17975,18813,19045,19229,19317,19652,19704,19878,19941,20218,20226,20918,22375,22384,23879,24015,26413,26417,26905,27367,27370,27979,53817,53872,54709,55944,56040,56347,56403,56541,65019,66085,66235,66590,66656,67025,67186,681…	Aco1,Akt1,Aplp1,App,Ddx3x,Dhx9,Drg1,Drg2,Eef1a1,Eef1a2,Eef2,Eif2s1,Eif3a,Eif4a1,Eif4a2,Eif4e,Eif4g2,Fau,Fmr1,Hagh,Gspt1,Hars,Hnrnpl,Elavl4,Ilf3,Impact,Eif3e,Khsrp,Rpsa,Ncl,Pa2g4,Ppp1ca,Ptk2b,Qk,Rbm3,Upf1,Rock2,Rpl26,Khdrbs1,Sars,Eif1,Wars,Eif4h,Fxr2,Abce1,Mapk1,Mapk3,Eif2s3x,Rpl3,Rps26,Eif3b,Ddx39b,Caprin1,Eif3i,Eif3d,Rplp1,Eif3c,Syncrip,Habp4,Rpl23,Eif3f,Eif1ax,Farsa,Eef1d,Rpl11,Rplp2,Eif3h,Rpl2…
14_Member	GO Biological Processes	GO:0034248	regulation of cellular amide metabolic process	-12.5597	-10.3604	62/383	11428,11651,11803,11816,11820,12759,13205,13211,13629,13665,13684,13690,13838,14265,15388,15572,16201,16210,16341,16549,17975,18604,18813,19045,19122,19229,19317,19652,19704,19878,19941,20218,23879,26413,26417,26905,27979,53817,53872,55944,56040,56347,56403,56541,68581,72416,73158,73826,74326,107508,110954,192170,208643,213541,217869,224742,229317,231659,233744,234734,270086,276770	Aco1,Akt1,Aplp1,Apoe,App,Clu,Ddx3x,Dhx9,Eef2,Eif2s1,Eif4e,Eif4g2,Epha4,Fmr1,Hnrnpl,Elavl4,Ilf3,Impact,Eif3e,Khsrp,Ncl,Pdk2,Pa2g4,Ppp1ca,Prnp,Ptk2b,Qk,Rbm3,Upf1,Rock2,Rpl26,Khdrbs1,Fxr2,Mapk1,Mapk3,Eif2s3x,Eif3b,Ddx39b,Caprin1,Eif3d,Rplp1,Eif3c,Syncrip,Habp4,Tmed10,Lrpprc,Larp1,Poldip3,Hnrnpr,Eprs,Rpl10,Eif4a3,Eif4g1,Ythdf2,Eif5,Abcf1,Eif2a,Gcn1,Spon1,Aars,Ogfod1,Eif5a
14_Member	GO Biological Processes	GO:0043604	amide biosynthetic process	-12.3774	-10.2005	95/742	11428,11651,11803,11820,11886,13205,13211,13494,13495,13627,13628,13629,13665,13669,13681,13682,13684,13690,14081,14109,14265,14651,14852,15115,15388,15572,16201,16210,16341,16549,16785,17975,18604,18813,19045,19229,19317,19652,19704,19878,19941,20218,20226,20918,22375,22384,23879,24015,26413,26417,26905,27367,27370,27979,53817,53872,54709,55944,56040,56347,56403,56541,65019,66085,66235,66590,666…	Aco1,Akt1,Aplp1,App,Asah1,Ddx3x,Dhx9,Drg1,Drg2,Eef1a1,Eef1a2,Eef2,Eif2s1,Eif3a,Eif4a1,Eif4a2,Eif4e,Eif4g2,Acsl1,Fau,Fmr1,Hagh,Gspt1,Hars,Hnrnpl,Elavl4,Ilf3,Impact,Eif3e,Khsrp,Rpsa,Ncl,Pdk2,Pa2g4,Ppp1ca,Ptk2b,Qk,Rbm3,Upf1,Rock2,Rpl26,Khdrbs1,Sars,Eif1,Wars,Eif4h,Fxr2,Abce1,Mapk1,Mapk3,Eif2s3x,Rpl3,Rps26,Eif3b,Ddx39b,Caprin1,Eif3i,Eif3d,Rplp1,Eif3c,Syncrip,Habp4,Rpl23,Eif3f,Eif1ax,Farsa,Eef1d,Rpl11…
14_Member	GO Biological Processes	GO:0006417	regulation of translation	-11.5636	-9.46349	55/333	11428,11651,11803,11820,13205,13211,13629,13665,13684,13690,14265,15388,15572,16201,16210,16341,16549,17975,18813,19045,19229,19317,19652,19704,19878,19941,20218,23879,26413,26417,26905,27979,53817,53872,55944,56040,56347,56403,56541,72416,73158,73826,74326,107508,110954,192170,208643,213541,217869,224742,229317,231659,234734,270086,276770	Aco1,Akt1,Aplp1,App,Ddx3x,Dhx9,Eef2,Eif2s1,Eif4e,Eif4g2,Fmr1,Hnrnpl,Elavl4,Ilf3,Impact,Eif3e,Khsrp,Ncl,Pa2g4,Ppp1ca,Ptk2b,Qk,Rbm3,Upf1,Rock2,Rpl26,Khdrbs1,Fxr2,Mapk1,Mapk3,Eif2s3x,Eif3b,Ddx39b,Caprin1,Eif3d,Rplp1,Eif3c,Syncrip,Habp4,Lrpprc,Larp1,Poldip3,Hnrnpr,Eprs,Rpl10,Eif4a3,Eif4g1,Ythdf2,Eif5,Abcf1,Eif2a,Gcn1,Aars,Ogfod1,Eif5a
14_Member	GO Biological Processes	GO:0010608	posttranscriptional regulation of gene expression	-10.7993	-8.74835	70/505	11428,11651,11803,11820,12539,13205,13207,13211,13629,13665,13684,13690,14265,15381,15388,15572,16201,16210,16341,16549,17184,17876,17975,18813,19045,19055,19229,19317,19652,19704,19878,19941,20218,22608,23879,26395,26413,26417,26905,27979,51810,53817,53872,55944,56040,56347,56403,56541,59092,68219,72416,73158,73826,74326,76936,77134,107508,110954,192170,208643,213541,217869,224742,229317,230753,…	Aco1,Akt1,Aplp1,App,Cdc37,Ddx3x,Ddx5,Dhx9,Eef2,Eif2s1,Eif4e,Eif4g2,Fmr1,Hnrnpc,Hnrnpl,Elavl4,Ilf3,Impact,Eif3e,Khsrp,Matr3,Myef2,Ncl,Pa2g4,Ppp1ca,Ppp3ca,Ptk2b,Qk,Rbm3,Upf1,Rock2,Rpl26,Khdrbs1,Ybx1,Fxr2,Map2k1,Mapk1,Mapk3,Eif2s3x,Eif3b,Hnrnpu,Ddx39b,Caprin1,Eif3d,Rplp1,Eif3c,Syncrip,Habp4,Pcbp4,Nudt21,Lrpprc,Larp1,Poldip3,Hnrnpr,Hnrnpm,Hnrnpa0,Eprs,Rpl10,Eif4a3,Eif4g1,Ythdf2,Eif5,Abcf1,Eif2a,Thrap…
14_Member	GO Biological Processes	GO:0034250	positive regulation of cellular amide metabolic process	-8.37776	-6.49993	29/144	11820,12759,13205,13211,13629,13690,13838,14265,15388,16210,16341,19229,19652,19878,19941,20218,23879,26413,26417,26905,53817,55944,56347,56541,73826,192170,213541,224742,276770	App,Clu,Ddx3x,Dhx9,Eef2,Eif4g2,Epha4,Fmr1,Hnrnpl,Impact,Eif3e,Ptk2b,Rbm3,Rock2,Rpl26,Khdrbs1,Fxr2,Mapk1,Mapk3,Eif2s3x,Ddx39b,Eif3d,Eif3c,Habp4,Poldip3,Eif4a3,Ythdf2,Abcf1,Eif5a
14_Member	GO Biological Processes	GO:0045727	positive regulation of translation	-7.62287	-5.81642	25/120	13205,13211,13629,13690,14265,15388,16210,16341,19229,19652,19941,20218,23879,26413,26417,26905,53817,55944,56347,56541,73826,192170,213541,224742,276770	Ddx3x,Dhx9,Eef2,Eif4g2,Fmr1,Hnrnpl,Impact,Eif3e,Ptk2b,Rbm3,Rpl26,Khdrbs1,Fxr2,Mapk1,Mapk3,Eif2s3x,Ddx39b,Eif3d,Eif3c,Habp4,Poldip3,Eif4a3,Ythdf2,Abcf1,Eif5a
15_Summary	GO Biological Processes	GO:0051668	localization within membrane	-15.7454	-13.2164	45/186	11773,11776,11816,12322,12568,12889,13429,14812,15444,16574,17920,17999,18164,18189,18190,18222,18479,19058,20334,20411,20614,23969,26395,26414,53310,54645,56430,56637,64009,65114,67826,67943,67979,73340,83945,99683,103967,104015,192176,216831,216963,218811,234214,242274,665113,59079,14810,14811,15507,16593,17762,26875,108100,224997,14228,19384,20823,24015,51810,53817,56350,66679,69823,71514,7317…	Ap2m1,Ap3d1,Apoe,Camk2a,Cdk5,Cplx1,Dnm1,Grin2b,Hpca,Kif5c,Myo6,Nedd4,Nptx1,Nrxn1,Nrxn2,Numb,Pak1,Ppp3r1,Sec23a,Sorbs1,Snap25,Pacsin1,Map2k1,Mapk10,Dlg3,Gripap1,Clip1,Gsk3b,Syne1,Vps35,Snap47,Mesd,Atad1,Nptxr,Dnaja3,Sec24b,Dnm3,Synj1,Flna,Arhgap44,Git1,Sec24c,Sorbs2,Lrrc7,Tnik,Erbin,Grin1,Grin2a,Hspb1,Klc1,Mapt,Pclo,Baiap2,Dlgap1,Fkbp4,Ran,Ssb,Abce1,Hnrnpu,Ddx39b,Arl3,Rae1,Fyttd1,Sfpq,Wasl,Poldip3…
15_Member	GO Biological Processes	GO:0051668	localization within membrane	-15.7454	-13.2164	45/186	11773,11776,11816,12322,12568,12889,13429,14812,15444,16574,17920,17999,18164,18189,18190,18222,18479,19058,20334,20411,20614,23969,26395,26414,53310,54645,56430,56637,64009,65114,67826,67943,67979,73340,83945,99683,103967,104015,192176,216831,216963,218811,234214,242274,665113	Ap2m1,Ap3d1,Apoe,Camk2a,Cdk5,Cplx1,Dnm1,Grin2b,Hpca,Kif5c,Myo6,Nedd4,Nptx1,Nrxn1,Nrxn2,Numb,Pak1,Ppp3r1,Sec23a,Sorbs1,Snap25,Pacsin1,Map2k1,Mapk10,Dlg3,Gripap1,Clip1,Gsk3b,Syne1,Vps35,Snap47,Mesd,Atad1,Nptxr,Dnaja3,Sec24b,Dnm3,Synj1,Flna,Arhgap44,Git1,Sec24c,Sorbs2,Lrrc7,Tnik
15_Member	GO Biological Processes	GO:0099072	regulation of postsynaptic membrane neurotransmitter receptor levels	-13.0379	-10.7787	29/96	11773,12322,12889,13429,15444,17920,17999,18164,18222,19058,20614,23969,26395,26414,53310,54645,56637,59079,64009,65114,67826,67979,73340,103967,104015,216831,216963,242274,665113	Ap2m1,Camk2a,Cplx1,Dnm1,Hpca,Myo6,Nedd4,Nptx1,Numb,Ppp3r1,Snap25,Pacsin1,Map2k1,Mapk10,Dlg3,Gripap1,Gsk3b,Erbin,Syne1,Vps35,Snap47,Atad1,Nptxr,Dnm3,Synj1,Arhgap44,Git1,Lrrc7,Tnik
15_Member	GO Biological Processes	GO:0035418	protein localization to synapse	-12.777	-10.5499	27/85	12322,12568,12889,14810,14811,15507,16574,16593,17762,18164,18189,18190,20614,26395,26414,26875,54645,56637,65114,67826,73340,108100,216831,216963,224997,242274,665113	Camk2a,Cdk5,Cplx1,Grin1,Grin2a,Hspb1,Kif5c,Klc1,Mapt,Nptx1,Nrxn1,Nrxn2,Snap25,Map2k1,Mapk10,Pclo,Gripap1,Gsk3b,Vps35,Snap47,Nptxr,Baiap2,Arhgap44,Git1,Dlgap1,Lrrc7,Tnik
15_Member	GO Biological Processes	GO:0031503	protein-containing complex localization	-10.9223	-8.86308	45/249	11773,11776,12322,12889,13429,14228,15444,16574,17920,17999,18164,18189,18222,19058,19384,20614,20823,23969,24015,26395,26414,51810,53310,53817,54645,56350,56637,64009,65114,66679,67826,67979,69823,71514,73178,73340,73826,103967,104015,108911,216831,216963,242274,276770,665113	Ap2m1,Ap3d1,Camk2a,Cplx1,Dnm1,Fkbp4,Hpca,Kif5c,Myo6,Nedd4,Nptx1,Nrxn1,Numb,Ppp3r1,Ran,Snap25,Ssb,Pacsin1,Abce1,Map2k1,Mapk10,Hnrnpu,Dlg3,Ddx39b,Gripap1,Arl3,Gsk3b,Syne1,Vps35,Rae1,Snap47,Atad1,Fyttd1,Sfpq,Wasl,Nptxr,Poldip3,Dnm3,Synj1,Rcc2,Arhgap44,Git1,Lrrc7,Eif5a,Tnik
15_Member	GO Biological Processes	GO:1903539	protein localization to postsynaptic membrane	-8.08191	-6.23091	17/55	12322,12889,14810,14811,18164,20614,26395,26414,54645,56637,65114,67826,73340,216831,216963,242274,665113	Camk2a,Cplx1,Grin1,Grin2a,Nptx1,Snap25,Map2k1,Mapk10,Gripap1,Gsk3b,Vps35,Snap47,Nptxr,Arhgap44,Git1,Lrrc7,Tnik
15_Member	GO Biological Processes	GO:0097120	receptor localization to synapse	-7.02843	-5.2771	18/71	12322,12889,16574,18164,18189,20614,26395,26414,53310,54645,56637,65114,67826,73340,216831,216963,242274,665113	Camk2a,Cplx1,Kif5c,Nptx1,Nrxn1,Snap25,Map2k1,Mapk10,Dlg3,Gripap1,Gsk3b,Vps35,Snap47,Nptxr,Arhgap44,Git1,Lrrc7,Tnik
15_Member	GO Biological Processes	GO:1902473	regulation of protein localization to synapse	-3.24201	-1.99123	7/26	12322,17762,26395,54645,56637,216831,665113	Camk2a,Mapt,Map2k1,Gripap1,Gsk3b,Arhgap44,Tnik
15_Member	GO Biological Processes	GO:0099633	protein localization to postsynaptic specialization membrane	-2.84059	-1.65787	7/30	12322,18164,26395,56637,73340,216963,665113	Camk2a,Nptx1,Map2k1,Gsk3b,Nptxr,Git1,Tnik
15_Member	GO Biological Processes	GO:0099645	neurotransmitter receptor localization to postsynaptic specialization membrane	-2.84059	-1.65787	7/30	12322,18164,26395,56637,73340,216963,665113	Camk2a,Nptx1,Map2k1,Gsk3b,Nptxr,Git1,Tnik
15_Member	GO Biological Processes	GO:1902683	regulation of receptor localization to synapse	-2.6655	-1.51554	6/24	12322,26395,54645,56637,216831,665113	Camk2a,Map2k1,Gripap1,Gsk3b,Arhgap44,Tnik
16_Summary	GO Biological Processes	GO:0008380	RNA splicing	-15.1858	-12.6968	65/365	12729,13207,13211,13992,14265,15381,15382,15387,15388,15481,16549,18458,19317,19652,19826,20218,20384,20624,20638,20901,22258,22608,22668,24010,27370,28000,28088,50783,51810,53607,53610,53817,56195,56215,56403,56541,56758,59013,59092,66125,66395,66637,66978,67040,67332,67465,67959,68816,70248,71514,72692,75956,76936,101739,104721,105559,108121,170791,192159,192170,219158,230753,230908,319322,3195…	Clns1a,Ddx5,Dhx9,Khdrbs3,Fmr1,Hnrnpc,Hnrnpa1,Hnrnpk,Hnrnpl,Hspa8,Khsrp,Pabpc1,Qk,Rbm3,Rnps1,Khdrbs1,Srsf5,Eftud2,Snrpb,Strap,Usp4,Ybx1,Sf1,Ik,Rps26,Prpf19,Rtcb,Lsm4,Hnrnpu,Snrpa,Nono,Ddx39b,Ptbp2,Acin1,Syncrip,Habp4,Mbnl1,Hnrnph1,Pcbp4,Sf3b5,Ahnak,Tsen15,Luc7l,Ddx17,Snrpd3,Sf3a1,Puf60,Ppil1,Dazap1,Sfpq,Hnrnpll,Srrm2,Hnrnpm,Psip1,Ddx1,Mbnl2,U2af1,Rbm39,Prpf8,Eif4a3,Ccar2,Thrap3,Tardbp,Sf3b2,Celf5,…
16_Member	GO Biological Processes	GO:0008380	RNA splicing	-15.1858	-12.6968	65/365	12729,13207,13211,13992,14265,15381,15382,15387,15388,15481,16549,18458,19317,19652,19826,20218,20384,20624,20638,20901,22258,22608,22668,24010,27370,28000,28088,50783,51810,53607,53610,53817,56195,56215,56403,56541,56758,59013,59092,66125,66395,66637,66978,67040,67332,67465,67959,68816,70248,71514,72692,75956,76936,101739,104721,105559,108121,170791,192159,192170,219158,230753,230908,319322,3195…	Clns1a,Ddx5,Dhx9,Khdrbs3,Fmr1,Hnrnpc,Hnrnpa1,Hnrnpk,Hnrnpl,Hspa8,Khsrp,Pabpc1,Qk,Rbm3,Rnps1,Khdrbs1,Srsf5,Eftud2,Snrpb,Strap,Usp4,Ybx1,Sf1,Ik,Rps26,Prpf19,Rtcb,Lsm4,Hnrnpu,Snrpa,Nono,Ddx39b,Ptbp2,Acin1,Syncrip,Habp4,Mbnl1,Hnrnph1,Pcbp4,Sf3b5,Ahnak,Tsen15,Luc7l,Ddx17,Snrpd3,Sf3a1,Puf60,Ppil1,Dazap1,Sfpq,Hnrnpll,Srrm2,Hnrnpm,Psip1,Ddx1,Mbnl2,U2af1,Rbm39,Prpf8,Eif4a3,Ccar2,Thrap3,Tardbp,Sf3b2,Celf5
16_Member	GO Biological Processes	GO:0006397	mRNA processing	-14.2835	-11.8762	72/449	11803,11820,12729,13207,13211,13992,14265,15381,15382,15387,15388,15481,16549,18458,18747,19317,19652,19826,20218,20384,20624,20638,20901,22258,22608,22668,23983,24010,28000,50783,51810,53607,53610,53817,56195,56215,56403,56541,56758,59013,59092,66125,66637,66978,67040,67332,67465,67897,67959,68219,68816,70248,71514,72692,74157,75956,76936,101739,104721,105559,108121,170791,192159,192170,219158,2…	Aplp1,App,Clns1a,Ddx5,Dhx9,Khdrbs3,Fmr1,Hnrnpc,Hnrnpa1,Hnrnpk,Hnrnpl,Hspa8,Khsrp,Pabpc1,Prkaca,Qk,Rbm3,Rnps1,Khdrbs1,Srsf5,Eftud2,Snrpb,Strap,Usp4,Ybx1,Sf1,Pcbp1,Ik,Prpf19,Lsm4,Hnrnpu,Snrpa,Nono,Ddx39b,Ptbp2,Acin1,Syncrip,Habp4,Mbnl1,Hnrnph1,Pcbp4,Sf3b5,Tsen15,Luc7l,Ddx17,Snrpd3,Sf3a1,Rnmt,Puf60,Nudt21,Ppil1,Dazap1,Sfpq,Hnrnpll,Cmtr1,Srrm2,Hnrnpm,Psip1,Ddx1,Mbnl2,U2af1,Rbm39,Prpf8,Eif4a3,Ccar2,Th…
16_Member	GO Biological Processes	GO:0016071	mRNA metabolic process	-12.8983	-10.6545	87/638	11803,11820,12729,13207,13211,13992,14265,14852,15381,15382,15387,15388,15481,15572,16341,16549,17876,18458,18747,19317,19652,19704,19826,19878,20218,20384,20624,20638,20823,20901,22258,22608,22668,23879,23983,24010,28000,50783,51810,53607,53610,53817,56195,56215,56403,56541,56758,59013,59092,66125,66637,66656,66978,67040,67332,67465,67897,67959,68219,68816,70248,71514,72692,73158,74157,74326,759…	Aplp1,App,Clns1a,Ddx5,Dhx9,Khdrbs3,Fmr1,Gspt1,Hnrnpc,Hnrnpa1,Hnrnpk,Hnrnpl,Hspa8,Elavl4,Eif3e,Khsrp,Myef2,Pabpc1,Prkaca,Qk,Rbm3,Upf1,Rnps1,Rock2,Khdrbs1,Srsf5,Eftud2,Snrpb,Ssb,Strap,Usp4,Ybx1,Sf1,Fxr2,Pcbp1,Ik,Prpf19,Lsm4,Hnrnpu,Snrpa,Nono,Ddx39b,Ptbp2,Acin1,Syncrip,Habp4,Mbnl1,Hnrnph1,Pcbp4,Sf3b5,Tsen15,Eef1d,Luc7l,Ddx17,Snrpd3,Sf3a1,Rnmt,Puf60,Nudt21,Ppil1,Dazap1,Sfpq,Hnrnpll,Larp1,Cmtr1,Hnrnpr…
16_Member	Reactome Gene Sets	R-MMU-8953854	Metabolism of RNA	-12.5994	-10.3923	74/505	11651,11737,13209,13211,13681,13682,13684,14852,15381,15382,15387,15388,15481,15507,16549,16785,17975,18458,18521,19052,19386,19704,19826,19941,20384,20624,20638,22608,22631,23983,27367,27370,28000,50783,51792,51810,53607,53817,56040,59013,65019,66125,66317,66511,66679,67025,67186,67332,67465,67897,67959,68193,68219,68816,69823,71978,72047,73826,74326,75705,75956,76936,77134,78294,108121,110954,1…	Akt1,Anp32a,Ddx6,Dhx9,Eif4a1,Eif4a2,Eif4e,Gspt1,Hnrnpc,Hnrnpa1,Hnrnpk,Hnrnpl,Hspa8,Hspb1,Khsrp,Rpsa,Ncl,Pabpc1,Pcbp2,Ppp2ca,Ranbp2,Upf1,Rnps1,Rpl26,Srsf5,Eftud2,Snrpb,Ybx1,Ywhaz,Pcbp1,Rpl3,Rps26,Prpf19,Lsm4,Ppp2r1a,Hnrnpu,Snrpa,Ddx39b,Rplp1,Hnrnph1,Rpl23,Sf3b5,Wdr61,Chtop,Rae1,Rpl11,Rplp2,Snrpd3,Sf3a1,Rnmt,Puf60,Rpl24,Nudt21,Ppil1,Fyttd1,Ppp2r2a,Ddx42,Poldip3,Hnrnpr,Eif4b,Srrm2,Hnrnpm,Hnrnpa0,Rps…
16_Member	GO Biological Processes	GO:0000375	RNA splicing, via transesterification reactions	-10.9999	-8.935	46/257	12729,13207,13211,13992,14265,15381,15382,15387,15388,15481,19652,19826,20218,20384,20624,20638,20901,22258,22668,24010,28000,50783,51810,53607,53817,56195,56215,56758,59092,66125,66978,67040,67332,67465,68816,70248,71514,76936,101739,105559,108121,192159,192170,230753,319322,319586	Clns1a,Ddx5,Dhx9,Khdrbs3,Fmr1,Hnrnpc,Hnrnpa1,Hnrnpk,Hnrnpl,Hspa8,Rbm3,Rnps1,Khdrbs1,Srsf5,Eftud2,Snrpb,Strap,Usp4,Sf1,Ik,Prpf19,Lsm4,Hnrnpu,Snrpa,Ddx39b,Ptbp2,Acin1,Mbnl1,Pcbp4,Sf3b5,Luc7l,Ddx17,Snrpd3,Sf3a1,Ppil1,Dazap1,Sfpq,Hnrnpm,Psip1,Mbnl2,U2af1,Prpf8,Eif4a3,Thrap3,Sf3b2,Celf5
16_Member	GO Biological Processes	GO:0000377	RNA splicing, via transesterification reactions with bulged adenosine as nucleophile	-10.9999	-8.935	46/257	12729,13207,13211,13992,14265,15381,15382,15387,15388,15481,19652,19826,20218,20384,20624,20638,20901,22258,22668,24010,28000,50783,51810,53607,53817,56195,56215,56758,59092,66125,66978,67040,67332,67465,68816,70248,71514,76936,101739,105559,108121,192159,192170,230753,319322,319586	Clns1a,Ddx5,Dhx9,Khdrbs3,Fmr1,Hnrnpc,Hnrnpa1,Hnrnpk,Hnrnpl,Hspa8,Rbm3,Rnps1,Khdrbs1,Srsf5,Eftud2,Snrpb,Strap,Usp4,Sf1,Ik,Prpf19,Lsm4,Hnrnpu,Snrpa,Ddx39b,Ptbp2,Acin1,Mbnl1,Pcbp4,Sf3b5,Luc7l,Ddx17,Snrpd3,Sf3a1,Ppil1,Dazap1,Sfpq,Hnrnpm,Psip1,Mbnl2,U2af1,Prpf8,Eif4a3,Thrap3,Sf3b2,Celf5
16_Member	GO Biological Processes	GO:0000398	mRNA splicing, via spliceosome	-10.9999	-8.935	46/257	12729,13207,13211,13992,14265,15381,15382,15387,15388,15481,19652,19826,20218,20384,20624,20638,20901,22258,22668,24010,28000,50783,51810,53607,53817,56195,56215,56758,59092,66125,66978,67040,67332,67465,68816,70248,71514,76936,101739,105559,108121,192159,192170,230753,319322,319586	Clns1a,Ddx5,Dhx9,Khdrbs3,Fmr1,Hnrnpc,Hnrnpa1,Hnrnpk,Hnrnpl,Hspa8,Rbm3,Rnps1,Khdrbs1,Srsf5,Eftud2,Snrpb,Strap,Usp4,Sf1,Ik,Prpf19,Lsm4,Hnrnpu,Snrpa,Ddx39b,Ptbp2,Acin1,Mbnl1,Pcbp4,Sf3b5,Luc7l,Ddx17,Snrpd3,Sf3a1,Ppil1,Dazap1,Sfpq,Hnrnpm,Psip1,Mbnl2,U2af1,Prpf8,Eif4a3,Thrap3,Sf3b2,Celf5
16_Member	Reactome Gene Sets	R-MMU-72203	Processing of Capped Intron-Containing Pre-mRNA	-10.5128	-8.48827	42/228	13211,13684,15381,15382,15387,15388,15481,18521,19386,19826,20384,20624,20638,22608,23983,28000,50783,51810,53607,53817,59013,66125,66511,66679,67332,67465,67959,68219,68816,69823,72047,73826,74326,75956,76936,77134,108121,192159,192170,233908,269061,319322	Dhx9,Eif4e,Hnrnpc,Hnrnpa1,Hnrnpk,Hnrnpl,Hspa8,Pcbp2,Ranbp2,Rnps1,Srsf5,Eftud2,Snrpb,Ybx1,Pcbp1,Prpf19,Lsm4,Hnrnpu,Snrpa,Ddx39b,Hnrnph1,Sf3b5,Chtop,Rae1,Snrpd3,Sf3a1,Puf60,Nudt21,Ppil1,Fyttd1,Ddx42,Poldip3,Hnrnpr,Srrm2,Hnrnpm,Hnrnpa0,U2af1,Prpf8,Eif4a3,Fus,Cpsf7,Sf3b2
16_Member	Reactome Gene Sets	R-MMU-72163	mRNA Splicing - Major Pathway	-10.1031	-8.11078	35/172	13211,15381,15382,15387,15388,15481,18521,19826,20384,20624,20638,22608,23983,28000,50783,51810,53607,59013,66125,67332,67465,67959,68219,68816,72047,74326,75956,76936,77134,108121,192159,192170,233908,269061,319322	Dhx9,Hnrnpc,Hnrnpa1,Hnrnpk,Hnrnpl,Hspa8,Pcbp2,Rnps1,Srsf5,Eftud2,Snrpb,Ybx1,Pcbp1,Prpf19,Lsm4,Hnrnpu,Snrpa,Hnrnph1,Sf3b5,Snrpd3,Sf3a1,Puf60,Nudt21,Ppil1,Ddx42,Hnrnpr,Srrm2,Hnrnpm,Hnrnpa0,U2af1,Prpf8,Eif4a3,Fus,Cpsf7,Sf3b2
16_Member	Reactome Gene Sets	R-MMU-72172	mRNA Splicing	-9.67172	-7.70489	35/178	13211,15381,15382,15387,15388,15481,18521,19826,20384,20624,20638,22608,23983,28000,50783,51810,53607,59013,66125,67332,67465,67959,68219,68816,72047,74326,75956,76936,77134,108121,192159,192170,233908,269061,319322	Dhx9,Hnrnpc,Hnrnpa1,Hnrnpk,Hnrnpl,Hspa8,Pcbp2,Rnps1,Srsf5,Eftud2,Snrpb,Ybx1,Pcbp1,Prpf19,Lsm4,Hnrnpu,Snrpa,Hnrnph1,Sf3b5,Snrpd3,Sf3a1,Puf60,Nudt21,Ppil1,Ddx42,Hnrnpr,Srrm2,Hnrnpm,Hnrnpa0,U2af1,Prpf8,Eif4a3,Fus,Cpsf7,Sf3b2
16_Member	GO Biological Processes	GO:0043484	regulation of RNA splicing	-7.42895	-5.64191	27/140	13207,13992,14265,15387,15388,15481,19652,19826,20218,20384,27370,28000,51810,56195,56215,56541,56758,59013,59092,66395,67040,70248,72692,105559,192170,230753,319586	Ddx5,Khdrbs3,Fmr1,Hnrnpk,Hnrnpl,Hspa8,Rbm3,Rnps1,Khdrbs1,Srsf5,Rps26,Prpf19,Hnrnpu,Ptbp2,Acin1,Habp4,Mbnl1,Hnrnph1,Pcbp4,Ahnak,Ddx17,Dazap1,Hnrnpll,Mbnl2,Eif4a3,Thrap3,Celf5
16_Member	KEGG Pathway	mmu03040	Spliceosome	-7.30335	-5.52517	26/133	13207,15381,15382,15387,15481,20384,20624,20638,23983,28000,50783,51810,53607,53817,56215,66125,67332,67465,67959,68816,72047,76936,108121,192159,192170,319322	Ddx5,Hnrnpc,Hnrnpa1,Hnrnpk,Hspa8,Srsf5,Eftud2,Snrpb,Pcbp1,Prpf19,Lsm4,Hnrnpu,Snrpa,Ddx39b,Acin1,Sf3b5,Snrpd3,Sf3a1,Puf60,Ppil1,Ddx42,Hnrnpm,U2af1,Prpf8,Eif4a3,Sf3b2
16_Member	GO Biological Processes	GO:0048024	regulation of mRNA splicing, via spliceosome	-6.12502	-4.49588	21/106	13207,13992,14265,15387,15388,15481,19652,19826,20218,20384,28000,51810,56215,56758,59092,67040,70248,105559,192170,230753,319586	Ddx5,Khdrbs3,Fmr1,Hnrnpk,Hnrnpl,Hspa8,Rbm3,Rnps1,Khdrbs1,Srsf5,Prpf19,Hnrnpu,Acin1,Mbnl1,Pcbp4,Ddx17,Dazap1,Mbnl2,Eif4a3,Thrap3,Celf5
16_Member	GO Biological Processes	GO:0050684	regulation of mRNA processing	-5.96648	-4.35754	25/145	13207,13211,13992,14265,15387,15388,15481,19652,19826,20218,20384,28000,51810,56215,56758,59092,67040,68219,70248,105559,192170,230753,269061,319586,432508	Ddx5,Dhx9,Khdrbs3,Fmr1,Hnrnpk,Hnrnpl,Hspa8,Rbm3,Rnps1,Khdrbs1,Srsf5,Prpf19,Hnrnpu,Acin1,Mbnl1,Pcbp4,Ddx17,Nudt21,Dazap1,Mbnl2,Eif4a3,Thrap3,Cpsf7,Celf5,Cpsf6
16_Member	GO Biological Processes	GO:0000380	alternative mRNA splicing, via spliceosome	-5.17092	-3.65413	16/76	13207,13211,14265,15382,15388,19826,20218,20384,51810,56758,67040,71514,76936,105559,230753,319586	Ddx5,Dhx9,Fmr1,Hnrnpa1,Hnrnpl,Rnps1,Khdrbs1,Srsf5,Hnrnpu,Mbnl1,Ddx17,Sfpq,Hnrnpm,Mbnl2,Thrap3,Celf5
16_Member	GO Biological Processes	GO:0000381	regulation of alternative mRNA splicing, via spliceosome	-3.52375	-2.22172	12/64	13207,14265,15388,19826,20218,20384,51810,56758,67040,105559,230753,319586	Ddx5,Fmr1,Hnrnpl,Rnps1,Khdrbs1,Srsf5,Hnrnpu,Mbnl1,Ddx17,Mbnl2,Thrap3,Celf5
17_Summary	GO Biological Processes	GO:0010256	endomembrane system organization	-14.5119	-12.092	66/386	11651,11735,11776,11938,12540,12704,12759,13196,13429,13823,17886,17988,18412,18472,19156,19330,19338,19339,19344,20168,20479,20720,22631,23969,26395,26413,26417,27643,52250,52551,54126,54198,54525,56041,56298,56491,59041,64009,66508,67878,68581,68585,69605,70231,71732,73178,73991,75608,76499,76707,77579,78885,84092,84095,93687,98732,99371,102058,104015,104303,108100,192197,226407,230908,271457,3…	Akt1,Ank3,Ap3d1,Atp2a2,Cdc42,Cit,Clu,Asap1,Dnm1,Epb41l3,Myh9,Ndrg1,Sqstm1,Pafah1b1,Psap,Rab18,Rab33b,Rab3a,Rab5b,Rtn3,Vps4b,Serpine2,Ywhaz,Pacsin1,Map2k1,Mapk1,Mapk3,Ubl4a,Reep1,Sgta,Arhgef7,Snx3,Syt7,Uso1,Atl2,Vapb,Stk25,Syne1,Lamtor1,Tmem33,Tmed10,Rtn4,Lnpk,Gorasp2,Vps11,Wasl,Atl1,Chmp4b,Clasp2,Clasp1,Myh10,Coro7,Usp8,Pi4k2a,Csnk1a1,Rab3gap2,Arfgef2,Exoc8,Synj1,Arl1,Baiap2,Bcas3,Rab3gap1,Tardbp…
17_Member	GO Biological Processes	GO:0010256	endomembrane system organization	-14.5119	-12.092	66/386	11651,11735,11776,11938,12540,12704,12759,13196,13429,13823,17886,17988,18412,18472,19156,19330,19338,19339,19344,20168,20479,20720,22631,23969,26395,26413,26417,27643,52250,52551,54126,54198,54525,56041,56298,56491,59041,64009,66508,67878,68581,68585,69605,70231,71732,73178,73991,75608,76499,76707,77579,78885,84092,84095,93687,98732,99371,102058,104015,104303,108100,192197,226407,230908,271457,3…	Akt1,Ank3,Ap3d1,Atp2a2,Cdc42,Cit,Clu,Asap1,Dnm1,Epb41l3,Myh9,Ndrg1,Sqstm1,Pafah1b1,Psap,Rab18,Rab33b,Rab3a,Rab5b,Rtn3,Vps4b,Serpine2,Ywhaz,Pacsin1,Map2k1,Mapk1,Mapk3,Ubl4a,Reep1,Sgta,Arhgef7,Snx3,Syt7,Uso1,Atl2,Vapb,Stk25,Syne1,Lamtor1,Tmem33,Tmed10,Rtn4,Lnpk,Gorasp2,Vps11,Wasl,Atl1,Chmp4b,Clasp2,Clasp1,Myh10,Coro7,Usp8,Pi4k2a,Csnk1a1,Rab3gap2,Arfgef2,Exoc8,Synj1,Arl1,Baiap2,Bcas3,Rab3gap1,Tardbp…
17_Member	GO Biological Processes	GO:0007030	Golgi organization	-5.72342	-4.14681	22/121	12540,12704,19338,22631,26395,26413,26417,54126,56041,56298,59041,64009,68581,70231,76499,76707,78885,84095,93687,104303,192197,360013	Cdc42,Cit,Rab33b,Ywhaz,Map2k1,Mapk1,Mapk3,Arhgef7,Uso1,Atl2,Stk25,Syne1,Tmed10,Gorasp2,Clasp2,Clasp1,Coro7,Pi4k2a,Csnk1a1,Arl1,Bcas3,Myo18a
18_Summary	Reactome Gene Sets	R-MMU-8953897	Cellular responses to external stimuli	-14.0949	-11.7043	68/413	12322,12323,12325,12359,12576,12955,13424,13426,13627,14228,14828,15481,15502,15505,15516,15519,15526,17750,18412,18415,19386,19646,19744,22428,26398,26400,26408,26413,26414,26417,26419,29810,50527,50932,51788,53598,54130,56351,56354,56444,57321,57436,59288,66105,66508,66679,66734,67443,67665,67673,67923,68196,68576,69654,70356,71745,75608,78294,93739,208092,219158,234663,235661,245688,245860,260…	Camk2a,Camk2b,Camk2g,Cat,Cdkn1b,Cryab,Dync1h1,Dync1i1,Eef1a1,Fkbp4,Hspa5,Hspa8,Dnaja1,Hsph1,Hsp90ab1,Hsp90aa1,Hspa9,Mt2,Sqstm1,Hspa4l,Ranbp2,Rbbp4,Rheb,Dctn6,Map2k4,Map2k7,Map3k5,Mapk1,Mapk10,Mapk3,Mapk8,Bag3,Ero1l,Mink1,H2afz,Dctn3,Actr1a,Ptges3,Dnajc7,Actr10,Terf2ip,Gabarapl1,Dctn5,Ube2d3,Lamtor1,Rae1,Map1lc3a,Map1lc3b,Dctn4,Elob,Eloc,Hsbp1,Lamtor5,Dctn2,St13,Cul2,Chmp4b,Rps27a,Gabarapl2,Chmp6,…
18_Member	Reactome Gene Sets	R-MMU-8953897	Cellular responses to external stimuli	-14.0949	-11.7043	68/413	12322,12323,12325,12359,12576,12955,13424,13426,13627,14228,14828,15481,15502,15505,15516,15519,15526,17750,18412,18415,19386,19646,19744,22428,26398,26400,26408,26413,26414,26417,26419,29810,50527,50932,51788,53598,54130,56351,56354,56444,57321,57436,59288,66105,66508,66679,66734,67443,67665,67673,67923,68196,68576,69654,70356,71745,75608,78294,93739,208092,219158,234663,235661,245688,245860,260…	Camk2a,Camk2b,Camk2g,Cat,Cdkn1b,Cryab,Dync1h1,Dync1i1,Eef1a1,Fkbp4,Hspa5,Hspa8,Dnaja1,Hsph1,Hsp90ab1,Hsp90aa1,Hspa9,Mt2,Sqstm1,Hspa4l,Ranbp2,Rbbp4,Rheb,Dctn6,Map2k4,Map2k7,Map3k5,Mapk1,Mapk10,Mapk3,Mapk8,Bag3,Ero1l,Mink1,H2afz,Dctn3,Actr1a,Ptges3,Dnajc7,Actr10,Terf2ip,Gabarapl1,Dctn5,Ube2d3,Lamtor1,Rae1,Map1lc3a,Map1lc3b,Dctn4,Elob,Eloc,Hsbp1,Lamtor5,Dctn2,St13,Cul2,Chmp4b,Rps27a,Gabarapl2,Chmp6,…
18_Member	Reactome Gene Sets	R-MMU-2262752	Cellular responses to stress	-11.9276	-9.80233	56/336	12322,12323,12325,12359,12576,12955,13424,13426,13627,14228,14828,15481,15502,15505,15516,15519,15526,18415,19386,19646,22428,26398,26400,26408,26413,26414,26417,26419,29810,50527,50932,51788,53598,54130,56351,56354,56444,57321,59288,66105,66679,67665,67673,67923,68196,69654,70356,71745,78294,219158,234663,235661,245688,260423,269523,665113	Camk2a,Camk2b,Camk2g,Cat,Cdkn1b,Cryab,Dync1h1,Dync1i1,Eef1a1,Fkbp4,Hspa5,Hspa8,Dnaja1,Hsph1,Hsp90ab1,Hsp90aa1,Hspa9,Hspa4l,Ranbp2,Rbbp4,Dctn6,Map2k4,Map2k7,Map3k5,Mapk1,Mapk10,Mapk3,Mapk8,Bag3,Ero1l,Mink1,H2afz,Dctn3,Actr1a,Ptges3,Dnajc7,Actr10,Terf2ip,Dctn5,Ube2d3,Rae1,Dctn4,Elob,Eloc,Hsbp1,Dctn2,St13,Cul2,Rps27a,Ccar2,Dync1li2,Dync1li1,Rbbp7,Hist1h3f,Vcp,Tnik
19_Summary	KEGG Pathway	mmu04141	Protein processing in endoplasmic reticulum	-13.9098	-11.5439	40/167	12282,12330,12334,12955,13665,14376,14827,14828,15481,15502,15505,15516,15519,18415,19359,20334,21402,22027,22230,22393,26400,26408,26414,26419,50527,54609,56424,59007,63958,66105,66530,66753,66861,67397,71853,81910,99683,103963,218811,269523,12759,16438,19053,19417,20316,52551,56491,56637,59025,66073,66155,66663,67089,67812,67878,70231,71472,72736,76577,225896	Hyou1,Canx,Capn2,Cryab,Eif2s1,Ganab,Pdia3,Hspa5,Hspa8,Dnaja1,Hsph1,Hsp90ab1,Hsp90aa1,Hspa4l,Rad23b,Sec23a,Skp1a,Hsp90b1,Ufd1,Wfs1,Map2k7,Map3k5,Mapk10,Mapk8,Ero1l,Ubqln2,Stub1,Ngly1,Ube4b,Ube2d3,Ubxn6,Erlec1,Dnajc10,Erp29,Pdia6,Rrbp1,Sec24b,Rpn1,Sec24c,Vcp,Clu,Itpr1,Ppp2cb,Rasgrf1,Sdf2,Sgta,Vapb,Gsk3b,Usp14,Txndc12,Ufc1,Uba5,Psmc6,Ubxn4,Tmem33,Gorasp2,Usp19,Tmx1,Faf2,Ubxn1
19_Member	KEGG Pathway	mmu04141	Protein processing in endoplasmic reticulum	-13.9098	-11.5439	40/167	12282,12330,12334,12955,13665,14376,14827,14828,15481,15502,15505,15516,15519,18415,19359,20334,21402,22027,22230,22393,26400,26408,26414,26419,50527,54609,56424,59007,63958,66105,66530,66753,66861,67397,71853,81910,99683,103963,218811,269523	Hyou1,Canx,Capn2,Cryab,Eif2s1,Ganab,Pdia3,Hspa5,Hspa8,Dnaja1,Hsph1,Hsp90ab1,Hsp90aa1,Hspa4l,Rad23b,Sec23a,Skp1a,Hsp90b1,Ufd1,Wfs1,Map2k7,Map3k5,Mapk10,Mapk8,Ero1l,Ubqln2,Stub1,Ngly1,Ube4b,Ube2d3,Ubxn6,Erlec1,Dnajc10,Erp29,Pdia6,Rrbp1,Sec24b,Rpn1,Sec24c,Vcp
19_Member	GO Biological Processes	GO:0034976	response to endoplasmic reticulum stress	-8.33996	-6.46415	39/237	12282,12330,12759,13665,14827,14828,16438,19053,19417,20316,22027,22230,22393,26408,50527,52551,54609,56424,56491,56637,59025,63958,66073,66155,66530,66663,66753,66861,67089,67397,67812,67878,70231,71472,71853,72736,76577,225896,269523	Hyou1,Canx,Clu,Eif2s1,Pdia3,Hspa5,Itpr1,Ppp2cb,Rasgrf1,Sdf2,Hsp90b1,Ufd1,Wfs1,Map3k5,Ero1l,Sgta,Ubqln2,Stub1,Vapb,Gsk3b,Usp14,Ube4b,Txndc12,Ufc1,Ubxn6,Uba5,Erlec1,Dnajc10,Psmc6,Erp29,Ubxn4,Tmem33,Gorasp2,Usp19,Pdia6,Tmx1,Faf2,Ubxn1,Vcp
19_Member	GO Biological Processes	GO:0036503	ERAD pathway	-5.52545	-3.96414	19/97	14828,20316,22027,22230,22393,52551,54609,56424,59025,63958,66530,66753,66861,67089,67812,71472,76577,225896,269523	Hspa5,Sdf2,Hsp90b1,Ufd1,Wfs1,Sgta,Ubqln2,Stub1,Usp14,Ube4b,Ubxn6,Erlec1,Dnajc10,Psmc6,Ubxn4,Usp19,Faf2,Ubxn1,Vcp
19_Member	GO Biological Processes	GO:0030433	ubiquitin-dependent ERAD pathway	-4.60442	-3.16293	15/75	14828,22027,22393,52551,54609,56424,59025,63958,66753,66861,67089,67812,71472,76577,269523	Hspa5,Hsp90b1,Wfs1,Sgta,Ubqln2,Stub1,Usp14,Ube4b,Erlec1,Dnajc10,Psmc6,Ubxn4,Usp19,Faf2,Vcp
20_Summary	GO Biological Processes	GO:0030100	regulation of endocytosis	-13.3446	-11.0416	54/293	11625,11773,11806,11816,11840,12306,12759,13429,13855,14265,15387,15444,15481,16568,16971,16976,17957,17999,18195,18222,18752,19055,19058,19063,19342,19344,20239,22041,22088,23969,52906,54198,54525,54609,55988,60595,64009,66914,67979,72685,72993,73178,74006,83814,104015,109689,109934,110279,216344,227541,241727,269774,271457,360013,12330,12331,12492,12527,13169,14784,17920,20614,22042,56440,83767…	Ahsg,Ap2m1,Apoa1,Apoe,Arf1,Anxa2,Clu,Dnm1,Epn2,Fmr1,Hnrnpk,Hpca,Hspa8,Kif3a,Lrp1,Lrpap1,Napb,Nedd4,Nsf,Numb,Prkcg,Ppp3ca,Ppp3r1,Ppt1,Rab4b,Rab5b,Atxn2,Trf,Tsg101,Pacsin1,Ahi1,Snx3,Syt7,Ubqln2,Snx12,Actn4,Syne1,Vps28,Atad1,Dnajc6,Appl1,Wasl,Dnm1l,Nedd4l,Synj1,Arrb1,Abr,Bcr,Rab21,Camk1d,Snph,Aak1,Rab5a,Myo18a,Canx,Cap1,Scarb2,Cd9,Dbnl,Grb2,Myo6,Snap25,Tfrc,Snx1,Wasf1,Dnm3,Grk2,Aplp1,App,Cdc42,Cdk5,…
20_Member	GO Biological Processes	GO:0030100	regulation of endocytosis	-13.3446	-11.0416	54/293	11625,11773,11806,11816,11840,12306,12759,13429,13855,14265,15387,15444,15481,16568,16971,16976,17957,17999,18195,18222,18752,19055,19058,19063,19342,19344,20239,22041,22088,23969,52906,54198,54525,54609,55988,60595,64009,66914,67979,72685,72993,73178,74006,83814,104015,109689,109934,110279,216344,227541,241727,269774,271457,360013	Ahsg,Ap2m1,Apoa1,Apoe,Arf1,Anxa2,Clu,Dnm1,Epn2,Fmr1,Hnrnpk,Hpca,Hspa8,Kif3a,Lrp1,Lrpap1,Napb,Nedd4,Nsf,Numb,Prkcg,Ppp3ca,Ppp3r1,Ppt1,Rab4b,Rab5b,Atxn2,Trf,Tsg101,Pacsin1,Ahi1,Snx3,Syt7,Ubqln2,Snx12,Actn4,Syne1,Vps28,Atad1,Dnajc6,Appl1,Wasl,Dnm1l,Nedd4l,Synj1,Arrb1,Abr,Bcr,Rab21,Camk1d,Snph,Aak1,Rab5a,Myo18a
20_Member	GO Biological Processes	GO:0006898	receptor-mediated endocytosis	-12.738	-10.5167	45/222	11773,11816,11840,12306,12330,12331,12492,12527,12759,13169,13429,14265,14784,15387,15444,16568,16971,16976,17920,17957,17999,18195,18222,19058,19063,20239,20614,22041,22042,23969,52906,54609,56440,64009,67979,72685,73178,83767,103967,104015,109689,110355,216344,269774,271457	Ap2m1,Apoe,Arf1,Anxa2,Canx,Cap1,Scarb2,Cd9,Clu,Dbnl,Dnm1,Fmr1,Grb2,Hnrnpk,Hpca,Kif3a,Lrp1,Lrpap1,Myo6,Napb,Nedd4,Nsf,Numb,Ppp3r1,Ppt1,Atxn2,Snap25,Trf,Tfrc,Pacsin1,Ahi1,Ubqln2,Snx1,Syne1,Atad1,Dnajc6,Wasl,Wasf1,Dnm3,Synj1,Arrb1,Grk2,Rab21,Aak1,Rab5a
20_Member	GO Biological Processes	GO:0048259	regulation of receptor-mediated endocytosis	-10.7161	-8.6732	28/109	11773,11840,12306,12759,14265,15387,15444,16568,16976,17957,17999,18195,18222,19058,19063,20239,22041,23969,52906,54609,64009,67979,72685,73178,104015,109689,216344,269774	Ap2m1,Arf1,Anxa2,Clu,Fmr1,Hnrnpk,Hpca,Kif3a,Lrpap1,Napb,Nedd4,Nsf,Numb,Ppp3r1,Ppt1,Atxn2,Trf,Pacsin1,Ahi1,Ubqln2,Syne1,Atad1,Dnajc6,Wasl,Synj1,Arrb1,Rab21,Aak1
20_Member	GO Biological Processes	GO:0006897	endocytosis	-10.4515	-8.43212	90/742	11625,11773,11803,11806,11816,11820,11840,12306,12330,12331,12492,12527,12540,12568,12759,13169,13429,13660,13854,13855,14265,14784,14824,15387,15444,15481,16568,16971,16976,17886,17920,17957,17975,17999,18195,18222,18752,19055,19058,19063,19326,19342,19344,19349,20239,20614,20661,22041,22042,22088,23969,26413,26417,52906,54198,54525,54609,55988,56440,60595,64009,66914,67602,67943,67979,68365,726…	Ahsg,Ap2m1,Aplp1,Apoa1,Apoe,App,Arf1,Anxa2,Canx,Cap1,Scarb2,Cd9,Cdc42,Cdk5,Clu,Dbnl,Dnm1,Ehd1,Epn1,Epn2,Fmr1,Grb2,Grn,Hnrnpk,Hpca,Hspa8,Kif3a,Lrp1,Lrpap1,Myh9,Myo6,Napb,Ncl,Nedd4,Nsf,Numb,Prkcg,Ppp3ca,Ppp3r1,Ppt1,Rab11b,Rab4b,Rab5b,Rab7,Atxn2,Snap25,Sort1,Trf,Tfrc,Tsg101,Pacsin1,Mapk1,Mapk3,Ahi1,Snx3,Syt7,Ubqln2,Snx12,Snx1,Actn4,Syne1,Vps28,Necap1,Mesd,Atad1,Rab14,Dnajc6,Appl1,Wasl,Dnm1l,Tusc2,Wa…
20_Member	GO Biological Processes	GO:0043112	receptor metabolic process	-9.65658	-7.69199	38/205	11773,11816,11840,12306,12527,12568,13429,14265,14784,15182,15387,15444,16976,17920,17957,17999,18195,18222,19058,19326,20239,20614,22042,23969,52906,54609,56440,64009,66508,67979,76959,99371,103967,104015,109689,110355,216963,271457	Ap2m1,Apoe,Arf1,Anxa2,Cd9,Cdk5,Dnm1,Fmr1,Grb2,Hdac2,Hnrnpk,Hpca,Lrpap1,Myo6,Napb,Nedd4,Nsf,Numb,Ppp3r1,Rab11b,Atxn2,Snap25,Tfrc,Pacsin1,Ahi1,Ubqln2,Snx1,Syne1,Lamtor1,Atad1,Chmp5,Arfgef2,Dnm3,Synj1,Arrb1,Grk2,Git1,Rab5a
20_Member	GO Biological Processes	GO:0031623	receptor internalization	-9.13046	-7.19613	28/126	11773,11840,12527,13429,14265,14784,15444,16976,17920,17957,17999,18195,18222,19058,20239,20614,22042,23969,52906,54609,56440,64009,67979,103967,104015,109689,110355,271457	Ap2m1,Arf1,Cd9,Dnm1,Fmr1,Grb2,Hpca,Lrpap1,Myo6,Napb,Nedd4,Nsf,Numb,Ppp3r1,Atxn2,Snap25,Tfrc,Pacsin1,Ahi1,Ubqln2,Snx1,Syne1,Atad1,Dnm3,Synj1,Arrb1,Grk2,Rab5a
20_Member	GO Biological Processes	GO:0045807	positive regulation of endocytosis	-8.67058	-6.77612	33/175	11625,11773,11806,11816,11840,12306,12759,13429,14265,15387,15481,16568,16971,19055,19063,22041,22088,52906,60595,64009,66914,67979,72993,73178,74006,83814,104015,109689,109934,110279,216344,227541,360013	Ahsg,Ap2m1,Apoa1,Apoe,Arf1,Anxa2,Clu,Dnm1,Fmr1,Hnrnpk,Hspa8,Kif3a,Lrp1,Ppp3ca,Ppt1,Trf,Tsg101,Ahi1,Actn4,Syne1,Vps28,Atad1,Appl1,Wasl,Dnm1l,Nedd4l,Synj1,Arrb1,Abr,Bcr,Rab21,Camk1d,Myo18a
20_Member	GO Biological Processes	GO:0002090	regulation of receptor internalization	-7.13115	-5.36872	18/70	11773,11840,14265,15444,16976,17957,17999,18195,18222,19058,20239,23969,52906,54609,64009,67979,104015,109689	Ap2m1,Arf1,Fmr1,Hpca,Lrpap1,Napb,Nedd4,Nsf,Numb,Ppp3r1,Atxn2,Pacsin1,Ahi1,Ubqln2,Syne1,Atad1,Synj1,Arrb1
20_Member	GO Biological Processes	GO:0098884	postsynaptic neurotransmitter receptor internalization	-7.11096	-5.35273	12/31	11773,13429,15444,17920,17999,18222,19058,23969,64009,67979,103967,104015	Ap2m1,Dnm1,Hpca,Myo6,Nedd4,Numb,Ppp3r1,Pacsin1,Syne1,Atad1,Dnm3,Synj1
20_Member	GO Biological Processes	GO:0140239	postsynaptic endocytosis	-7.11096	-5.35273	12/31	11773,13429,15444,17920,17999,18222,19058,23969,64009,67979,103967,104015	Ap2m1,Dnm1,Hpca,Myo6,Nedd4,Numb,Ppp3r1,Pacsin1,Syne1,Atad1,Dnm3,Synj1
20_Member	GO Biological Processes	GO:0099590	neurotransmitter receptor internalization	-6.90917	-5.17529	13/38	11773,13429,15444,17920,17999,18222,19058,20614,23969,64009,67979,103967,104015	Ap2m1,Dnm1,Hpca,Myo6,Nedd4,Numb,Ppp3r1,Snap25,Pacsin1,Syne1,Atad1,Dnm3,Synj1
20_Member	GO Biological Processes	GO:0048260	positive regulation of receptor-mediated endocytosis	-6.18738	-4.55199	15/57	11773,12306,12759,14265,15387,16568,19063,22041,52906,64009,67979,73178,104015,109689,216344	Ap2m1,Anxa2,Clu,Fmr1,Hnrnpk,Kif3a,Ppt1,Trf,Ahi1,Syne1,Atad1,Wasl,Synj1,Arrb1,Rab21
20_Member	GO Biological Processes	GO:0099149	regulation of postsynaptic neurotransmitter receptor internalization	-4.5202	-3.08735	8/23	15444,17999,18222,19058,23969,64009,67979,104015	Hpca,Nedd4,Numb,Ppp3r1,Pacsin1,Syne1,Atad1,Synj1

## Sheet: Table S5C_Function_Enrichment
Table S5C_Function_Enrichment of actively translating proteins in murine brain tissue by Metscape
GroupID	Category	Term	Description	LogP	Log(q-value)	InTerm_InList	Genes	Symbols
1_Summary	GO Molecular Functions	GO:0019904	protein domain specific binding	-25.7957	-22.1359	129/798	11308,11632,11773,11820,11840,11848,12301,12313,12387,12417,12466,12704,12876,12914,13001,13169,13194,13207,13209,13384,13429,13800,13838,13992,14232,14265,14360,14609,14683,14768,14784,14828,15182,15381,15387,15481,15502,15516,15519,16202,16211,16728,16784,17762,17886,17918,18195,18412,18571,18747,18754,19047,19052,19058,19084,19247,19317,19346,19384,19684,20218,20239,20262,20384,20614,21402,218…	Abi1,Aip,Ap2m1,App,Arf1,Rhoa,Cacybp,Calm1,Ctnnb1,Cbx3,Cct6a,Cit,Cpe,Crebbp,Csnk2b,Dbnl,Ddb1,Ddx5,Ddx6,Mpp3,Dnm1,Enah,Epha4,Khdrbs3,Fkbp8,Fmr1,Fyn,Gja1,Gnas,Lancl1,Grb2,Hspa5,Hdac2,Hnrnpc,Hnrnpk,Hspa8,Dnaja1,Hsp90ab1,Hsp90aa1,Ilk,Kpnb1,L1cam,Lamp2,Mapt,Myh9,Myo5a,Nsf,Sqstm1,Pdcd6ip,Prkaca,Prkce,Ppp1cc,Ppp2ca,Ppp3r1,Prkar1a,Ptpn11,Qk,Rab6a,Ran,Rdx,Khdrbs1,Atxn2,Stmn3,Srsf5,Snap25,Skp1a,Trim28,Tjp2,…
1_Member	GO Molecular Functions	GO:0019904	protein domain specific binding	-25.7957	-22.1359	129/798	11308,11632,11773,11820,11840,11848,12301,12313,12387,12417,12466,12704,12876,12914,13001,13169,13194,13207,13209,13384,13429,13800,13838,13992,14232,14265,14360,14609,14683,14768,14784,14828,15182,15381,15387,15481,15502,15516,15519,16202,16211,16728,16784,17762,17886,17918,18195,18412,18571,18747,18754,19047,19052,19058,19084,19247,19317,19346,19384,19684,20218,20239,20262,20384,20614,21402,218…	Abi1,Aip,Ap2m1,App,Arf1,Rhoa,Cacybp,Calm1,Ctnnb1,Cbx3,Cct6a,Cit,Cpe,Crebbp,Csnk2b,Dbnl,Ddb1,Ddx5,Ddx6,Mpp3,Dnm1,Enah,Epha4,Khdrbs3,Fkbp8,Fmr1,Fyn,Gja1,Gnas,Lancl1,Grb2,Hspa5,Hdac2,Hnrnpc,Hnrnpk,Hspa8,Dnaja1,Hsp90ab1,Hsp90aa1,Ilk,Kpnb1,L1cam,Lamp2,Mapt,Myh9,Myo5a,Nsf,Sqstm1,Pdcd6ip,Prkaca,Prkce,Ppp1cc,Ppp2ca,Ppp3r1,Prkar1a,Ptpn11,Qk,Rab6a,Ran,Rdx,Khdrbs1,Atxn2,Stmn3,Srsf5,Snap25,Skp1a,Trim28,Tjp2,…
2_Summary	GO Molecular Functions	GO:0051082	unfolded protein binding	-17.4278	-14.069	34/97	11632,12330,12406,12461,12462,12464,12465,12466,12468,12469,12539,12759,12955,14828,15481,15502,15516,15519,15526,18221,19035,20394,21454,22027,56351,56612,63958,66753,67035,67072,67738,70356,83945,209586	Aip,Canx,Serpinh1,Cct2,Cct3,Cct4,Cct5,Cct6a,Cct7,Cct8,Cdc37,Clu,Cryab,Hspa5,Hspa8,Dnaja1,Hsp90ab1,Hsp90aa1,Hspa9,Nudc,Ppib,Scg5,Tcp1,Hsp90b1,Ptges3,Pfdn5,Ube4b,Erlec1,Dnajb4,Cdc37l1,Ppid,St13,Dnaja3,Nudcd3
2_Member	GO Molecular Functions	GO:0051082	unfolded protein binding	-17.4278	-14.069	34/97	11632,12330,12406,12461,12462,12464,12465,12466,12468,12469,12539,12759,12955,14828,15481,15502,15516,15519,15526,18221,19035,20394,21454,22027,56351,56612,63958,66753,67035,67072,67738,70356,83945,209586	Aip,Canx,Serpinh1,Cct2,Cct3,Cct4,Cct5,Cct6a,Cct7,Cct8,Cdc37,Clu,Cryab,Hspa5,Hspa8,Dnaja1,Hsp90ab1,Hsp90aa1,Hspa9,Nudc,Ppib,Scg5,Tcp1,Hsp90b1,Ptges3,Pfdn5,Ube4b,Erlec1,Dnajb4,Cdc37l1,Ppid,St13,Dnaja3,Nudcd3
3_Summary	GO Molecular Functions	GO:0003729	mRNA binding	-14.7572	-11.6268	54/272	11428,12465,13205,13207,13209,13211,13627,13669,13690,14265,15381,15382,15387,15388,15519,15572,16201,16549,17876,17975,18458,19317,19652,19826,19941,20823,22099,22608,23879,23881,23983,27041,27370,51810,55944,56195,56403,59092,66870,66978,68219,69823,70248,72692,73158,74326,76936,77134,77579,192170,208643,230908,319586,432508	Aco1,Cct5,Ddx3x,Ddx5,Ddx6,Dhx9,Eef1a1,Eif3a,Eif4g2,Fmr1,Hnrnpc,Hnrnpa1,Hnrnpk,Hnrnpl,Hsp90aa1,Elavl4,Ilf3,Khsrp,Myef2,Ncl,Pabpc1,Qk,Rbm3,Rnps1,Rpl26,Ssb,Tsn,Ybx1,Fxr2,G3bp2,Pcbp1,G3bp1,Rps26,Hnrnpu,Eif3d,Ptbp2,Syncrip,Pcbp4,Serbp1,Luc7l,Nudt21,Fyttd1,Dazap1,Hnrnpll,Larp1,Hnrnpr,Hnrnpm,Hnrnpa0,Myh10,Eif4a3,Eif4g1,Tardbp,Celf5,Cpsf6
3_Member	GO Molecular Functions	GO:0003729	mRNA binding	-14.7572	-11.6268	54/272	11428,12465,13205,13207,13209,13211,13627,13669,13690,14265,15381,15382,15387,15388,15519,15572,16201,16549,17876,17975,18458,19317,19652,19826,19941,20823,22099,22608,23879,23881,23983,27041,27370,51810,55944,56195,56403,59092,66870,66978,68219,69823,70248,72692,73158,74326,76936,77134,77579,192170,208643,230908,319586,432508	Aco1,Cct5,Ddx3x,Ddx5,Ddx6,Dhx9,Eef1a1,Eif3a,Eif4g2,Fmr1,Hnrnpc,Hnrnpa1,Hnrnpk,Hnrnpl,Hsp90aa1,Elavl4,Ilf3,Khsrp,Myef2,Ncl,Pabpc1,Qk,Rbm3,Rnps1,Rpl26,Ssb,Tsn,Ybx1,Fxr2,G3bp2,Pcbp1,G3bp1,Rps26,Hnrnpu,Eif3d,Ptbp2,Syncrip,Pcbp4,Serbp1,Luc7l,Nudt21,Fyttd1,Dazap1,Hnrnpll,Larp1,Hnrnpr,Hnrnpm,Hnrnpa0,Myh10,Eif4a3,Eif4g1,Tardbp,Celf5,Cpsf6
3_Member	GO Molecular Functions	GO:0003730	mRNA 3'-UTR binding	-7.93717	-5.76483	22/92	12465,13207,14265,15381,15387,15388,15572,16201,16549,18458,19652,19826,23879,51810,59092,66870,68219,70248,73158,74326,77134,230908	Cct5,Ddx5,Fmr1,Hnrnpc,Hnrnpk,Hnrnpl,Elavl4,Ilf3,Khsrp,Pabpc1,Rbm3,Rnps1,Fxr2,Hnrnpu,Pcbp4,Serbp1,Nudt21,Dazap1,Larp1,Hnrnpr,Hnrnpa0,Tardbp
4_Summary	GO Molecular Functions	GO:0015631	tubulin binding	-14.6845	-11.6268	61/336	11789,12301,12465,12955,13426,13429,13494,13518,14265,14360,14609,14683,15505,16560,16563,16564,16568,16574,16593,16765,17755,17756,17758,17762,17988,18472,19060,19122,20262,26370,30960,52250,52589,54418,56350,56398,56430,56491,56527,66734,67166,67443,71994,72416,72993,74006,74237,75786,76499,76707,100732,101706,103967,108911,192197,213582,216965,227634,229589,231912,269713	Apc,Cacybp,Cct5,Cryab,Dync1i1,Dnm1,Drg1,Dst,Fmr1,Fyn,Gja1,Gnas,Hsph1,Kif1a,Kif2a,Kif21a,Kif3a,Kif5c,Klc1,Stmn1,Map1b,Map2,Map4,Mapt,Ndrg1,Pafah1b1,Ppp5c,Prnp,Stmn3,Cetn2,Vapa,Reep1,Ncald,Fmn2,Arl3,Chp1,Clip1,Vapb,Mast1,Map1lc3a,Arl8b,Map1lc3b,Cnn3,Lrpprc,Appl1,Dnm1l,Tubgcp2,Ckap5,Clasp2,Clasp1,Mapre3,Numa1,Dnm3,Rcc2,Bcas3,Map9,Taok1,Camsap1,Prune1,Katnal1,Clip2
4_Member	GO Molecular Functions	GO:0015631	tubulin binding	-14.6845	-11.6268	61/336	11789,12301,12465,12955,13426,13429,13494,13518,14265,14360,14609,14683,15505,16560,16563,16564,16568,16574,16593,16765,17755,17756,17758,17762,17988,18472,19060,19122,20262,26370,30960,52250,52589,54418,56350,56398,56430,56491,56527,66734,67166,67443,71994,72416,72993,74006,74237,75786,76499,76707,100732,101706,103967,108911,192197,213582,216965,227634,229589,231912,269713	Apc,Cacybp,Cct5,Cryab,Dync1i1,Dnm1,Drg1,Dst,Fmr1,Fyn,Gja1,Gnas,Hsph1,Kif1a,Kif2a,Kif21a,Kif3a,Kif5c,Klc1,Stmn1,Map1b,Map2,Map4,Mapt,Ndrg1,Pafah1b1,Ppp5c,Prnp,Stmn3,Cetn2,Vapa,Reep1,Ncald,Fmn2,Arl3,Chp1,Clip1,Vapb,Mast1,Map1lc3a,Arl8b,Map1lc3b,Cnn3,Lrpprc,Appl1,Dnm1l,Tubgcp2,Ckap5,Clasp2,Clasp1,Mapre3,Numa1,Dnm3,Rcc2,Bcas3,Map9,Taok1,Camsap1,Prune1,Katnal1,Clip2
4_Member	GO Molecular Functions	GO:0008017	microtubule binding	-11.5583	-9.1772	45/239	11789,12955,13426,13429,13494,13518,14265,16560,16563,16564,16568,16574,17755,17756,17758,17762,17988,18472,19060,19122,26370,30960,52250,54418,56350,56398,56430,56491,56527,66734,67443,71994,74006,74237,75786,76499,76707,100732,101706,103967,108911,213582,227634,231912,269713	Apc,Cryab,Dync1i1,Dnm1,Drg1,Dst,Fmr1,Kif1a,Kif2a,Kif21a,Kif3a,Kif5c,Map1b,Map2,Map4,Mapt,Ndrg1,Pafah1b1,Ppp5c,Prnp,Cetn2,Vapa,Reep1,Fmn2,Arl3,Chp1,Clip1,Vapb,Mast1,Map1lc3a,Map1lc3b,Cnn3,Dnm1l,Tubgcp2,Ckap5,Clasp2,Clasp1,Mapre3,Numa1,Dnm3,Rcc2,Map9,Camsap1,Katnal1,Clip2
5_Summary	GO Molecular Functions	GO:0019901	protein kinase binding	-14.2796	-11.3818	98/724	11651,11789,11848,11852,12298,12323,12387,12539,12540,12568,12576,13429,13627,13628,13629,13669,13838,14265,14609,14784,14811,14815,14862,15469,15507,15516,15519,16202,16480,16563,16706,17118,17698,17756,17762,17918,18195,18212,18412,18479,18484,18607,18611,18739,18747,18751,18754,18767,18798,19046,19052,19084,19085,19229,19247,19417,19744,20384,20411,20971,22375,22628,22631,26395,26398,26400,264…	Akt1,Apc,Rhoa,Rhob,Cacnb4,Camk2b,Ctnnb1,Cdc37,Cdc42,Cdk5,Cdkn1b,Dnm1,Eef1a1,Eef1a2,Eef2,Eif3a,Epha4,Fmr1,Gja1,Grb2,Grin2a,Nr3c1,Gstm1,Prmt1,Hspb1,Hsp90ab1,Hsp90aa1,Ilk,Jup,Kif2a,Ksr1,Marcks,Msn,Map2,Mapt,Myo5a,Nsf,Ntrk2,Sqstm1,Pak1,Pam,Pdpk1,Pea15a,Pitpnm1,Prkaca,Prkcb,Prkce,Pkia,Plcb4,Ppp1cb,Ppp2ca,Prkar1a,Prkar1b,Ptk2b,Ptpn11,Rasgrf1,Rheb,Srsf5,Sorbs1,Sdc4,Wars,Ywhag,Ywhaz,Map2k1,Map2k4,Map2k7,…
5_Member	GO Molecular Functions	GO:0019901	protein kinase binding	-14.2796	-11.3818	98/724	11651,11789,11848,11852,12298,12323,12387,12539,12540,12568,12576,13429,13627,13628,13629,13669,13838,14265,14609,14784,14811,14815,14862,15469,15507,15516,15519,16202,16480,16563,16706,17118,17698,17756,17762,17918,18195,18212,18412,18479,18484,18607,18611,18739,18747,18751,18754,18767,18798,19046,19052,19084,19085,19229,19247,19417,19744,20384,20411,20971,22375,22628,22631,26395,26398,26400,264…	Akt1,Apc,Rhoa,Rhob,Cacnb4,Camk2b,Ctnnb1,Cdc37,Cdc42,Cdk5,Cdkn1b,Dnm1,Eef1a1,Eef1a2,Eef2,Eif3a,Epha4,Fmr1,Gja1,Grb2,Grin2a,Nr3c1,Gstm1,Prmt1,Hspb1,Hsp90ab1,Hsp90aa1,Ilk,Jup,Kif2a,Ksr1,Marcks,Msn,Map2,Mapt,Myo5a,Nsf,Ntrk2,Sqstm1,Pak1,Pam,Pdpk1,Pea15a,Pitpnm1,Prkaca,Prkcb,Prkce,Pkia,Plcb4,Ppp1cb,Ppp2ca,Prkar1a,Prkar1b,Ptk2b,Ptpn11,Rasgrf1,Rheb,Srsf5,Sorbs1,Sdc4,Wars,Ywhag,Ywhaz,Map2k1,Map2k4,Map2k7,…
6_Summary	GO Molecular Functions	GO:0031625	ubiquitin protein ligase binding	-14.2635	-11.3818	57/306	11785,11789,12301,12461,12709,12759,14751,14828,15481,15502,15516,15519,15526,18002,18412,18521,18747,18813,19084,19229,19387,20411,21454,21849,22088,22210,22218,22223,22393,22631,26554,53310,54473,56424,56637,57436,65019,66105,66734,67025,67443,68585,70247,71472,71745,72416,74006,76577,78294,93739,93765,99375,109689,110355,225896,226646,269523	Apbb1,Apc,Cacybp,Cct2,Ckb,Clu,Gpi1,Hspa5,Hspa8,Dnaja1,Hsp90ab1,Hsp90aa1,Hspa9,Nedd8,Sqstm1,Pcbp2,Prkaca,Pa2g4,Prkar1a,Ptk2b,Rangap1,Sorbs1,Tcp1,Trim28,Tsg101,Ube2b,Sumo1,Uchl1,Wfs1,Ywhaz,Cul3,Dlg3,Tollip,Stub1,Gsk3b,Gabarapl1,Rpl23,Ube2d3,Map1lc3a,Rpl11,Map1lc3b,Rtn4,Psmd1,Usp19,Cul2,Lrpprc,Dnm1l,Faf2,Rps27a,Gabarapl2,Ube2n,Cul4a,Arrb1,Grk2,Ubxn1,Ndufs2,Vcp
6_Member	GO Molecular Functions	GO:0031625	ubiquitin protein ligase binding	-14.2635	-11.3818	57/306	11785,11789,12301,12461,12709,12759,14751,14828,15481,15502,15516,15519,15526,18002,18412,18521,18747,18813,19084,19229,19387,20411,21454,21849,22088,22210,22218,22223,22393,22631,26554,53310,54473,56424,56637,57436,65019,66105,66734,67025,67443,68585,70247,71472,71745,72416,74006,76577,78294,93739,93765,99375,109689,110355,225896,226646,269523	Apbb1,Apc,Cacybp,Cct2,Ckb,Clu,Gpi1,Hspa5,Hspa8,Dnaja1,Hsp90ab1,Hsp90aa1,Hspa9,Nedd8,Sqstm1,Pcbp2,Prkaca,Pa2g4,Prkar1a,Ptk2b,Rangap1,Sorbs1,Tcp1,Trim28,Tsg101,Ube2b,Sumo1,Uchl1,Wfs1,Ywhaz,Cul3,Dlg3,Tollip,Stub1,Gsk3b,Gabarapl1,Rpl23,Ube2d3,Map1lc3a,Rpl11,Map1lc3b,Rtn4,Psmd1,Usp19,Cul2,Lrpprc,Dnm1l,Faf2,Rps27a,Gabarapl2,Ube2n,Cul4a,Arrb1,Grk2,Ubxn1,Ndufs2,Vcp
6_Member	GO Molecular Functions	GO:0044389	ubiquitin-like protein ligase binding	-13.0914	-10.5845	57/325	11785,11789,12301,12461,12709,12759,14751,14828,15481,15502,15516,15519,15526,18002,18412,18521,18747,18813,19084,19229,19387,20411,21454,21849,22088,22210,22218,22223,22393,22631,26554,53310,54473,56424,56637,57436,65019,66105,66734,67025,67443,68585,70247,71472,71745,72416,74006,76577,78294,93739,93765,99375,109689,110355,225896,226646,269523	Apbb1,Apc,Cacybp,Cct2,Ckb,Clu,Gpi1,Hspa5,Hspa8,Dnaja1,Hsp90ab1,Hsp90aa1,Hspa9,Nedd8,Sqstm1,Pcbp2,Prkaca,Pa2g4,Prkar1a,Ptk2b,Rangap1,Sorbs1,Tcp1,Trim28,Tsg101,Ube2b,Sumo1,Uchl1,Wfs1,Ywhaz,Cul3,Dlg3,Tollip,Stub1,Gsk3b,Gabarapl1,Rpl23,Ube2d3,Map1lc3a,Rpl11,Map1lc3b,Rtn4,Psmd1,Usp19,Cul2,Lrpprc,Dnm1l,Faf2,Rps27a,Gabarapl2,Ube2n,Cul4a,Arrb1,Grk2,Ubxn1,Ndufs2,Vcp
7_Summary	GO Molecular Functions	GO:0008135	translation factor activity, RNA binding	-13.9795	-11.1648	27/77	13627,13628,13629,13665,13669,13681,13682,13684,13690,14852,16341,20918,22384,26905,27979,54709,55944,56347,66085,66235,66656,68135,75705,208643,217869,229317,276770	Eef1a1,Eef1a2,Eef2,Eif2s1,Eif3a,Eif4a1,Eif4a2,Eif4e,Eif4g2,Gspt1,Eif3e,Eif1,Eif4h,Eif2s3x,Eif3b,Eif3i,Eif3d,Eif3c,Eif3f,Eif1ax,Eef1d,Eif3h,Eif4b,Eif4g1,Eif5,Eif2a,Eif5a
7_Member	GO Molecular Functions	GO:0008135	translation factor activity, RNA binding	-13.9795	-11.1648	27/77	13627,13628,13629,13665,13669,13681,13682,13684,13690,14852,16341,20918,22384,26905,27979,54709,55944,56347,66085,66235,66656,68135,75705,208643,217869,229317,276770	Eef1a1,Eef1a2,Eef2,Eif2s1,Eif3a,Eif4a1,Eif4a2,Eif4e,Eif4g2,Gspt1,Eif3e,Eif1,Eif4h,Eif2s3x,Eif3b,Eif3i,Eif3d,Eif3c,Eif3f,Eif1ax,Eef1d,Eif3h,Eif4b,Eif4g1,Eif5,Eif2a,Eif5a
7_Member	GO Molecular Functions	GO:0003743	translation initiation factor activity	-13.4853	-10.9101	21/47	13665,13669,13681,13682,13684,13690,16341,20918,22384,26905,27979,54709,55944,56347,66085,66235,68135,75705,208643,217869,229317	Eif2s1,Eif3a,Eif4a1,Eif4a2,Eif4e,Eif4g2,Eif3e,Eif1,Eif4h,Eif2s3x,Eif3b,Eif3i,Eif3d,Eif3c,Eif3f,Eif1ax,Eif3h,Eif4b,Eif4g1,Eif5,Eif2a
8_Summary	GO Molecular Functions	GO:0032550	purine ribonucleoside binding	-13.756	-10.9993	62/361	11566,11840,11842,11843,11844,11848,11852,12540,13429,13494,13495,13627,13628,13629,13660,14228,14677,14682,14683,14852,15516,15519,18952,19139,19326,19330,19338,19339,19342,19344,19346,19349,19384,19744,20362,20624,26905,56298,56327,56350,56382,59040,67059,67166,67295,68203,68365,69721,73991,74006,76308,103967,104303,210146,213990,216344,217869,218639,232906,235661,270192,271457,60595,13205,1470…	Adss,Arf1,Arf3,Arf4,Arf5,Rhoa,Rhob,Cdc42,Dnm1,Drg1,Drg2,Eef1a1,Eef1a2,Eef2,Ehd1,Fkbp4,Gnai1,Gnaq,Gnas,Gspt1,Hsp90ab1,Hsp90aa1,Sept4,Prps1,Rab11b,Rab18,Rab33b,Rab3a,Rab4b,Rab5b,Rab6a,Rab7,Ran,Rheb,Sept8,Eftud2,Eif2s3x,Atl2,Arl2,Arl3,Rab9,Rhot1,Ola1,Arl8b,Rab3c,Diras2,Rab14,Nkiras1,Atl1,Dnm1l,Rab1b,Dnm3,Arl1,Irgq,Agap3,Rab21,Eif5,Arl15,Arhgap35,Dync1li1,Rab6b,Rab5a,Actn4,Ddx3x,Gng3,Mmut
8_Member	GO Molecular Functions	GO:0032550	purine ribonucleoside binding	-13.756	-10.9993	62/361	11566,11840,11842,11843,11844,11848,11852,12540,13429,13494,13495,13627,13628,13629,13660,14228,14677,14682,14683,14852,15516,15519,18952,19139,19326,19330,19338,19339,19342,19344,19346,19349,19384,19744,20362,20624,26905,56298,56327,56350,56382,59040,67059,67166,67295,68203,68365,69721,73991,74006,76308,103967,104303,210146,213990,216344,217869,218639,232906,235661,270192,271457	Adss,Arf1,Arf3,Arf4,Arf5,Rhoa,Rhob,Cdc42,Dnm1,Drg1,Drg2,Eef1a1,Eef1a2,Eef2,Ehd1,Fkbp4,Gnai1,Gnaq,Gnas,Gspt1,Hsp90ab1,Hsp90aa1,Sept4,Prps1,Rab11b,Rab18,Rab33b,Rab3a,Rab4b,Rab5b,Rab6a,Rab7,Ran,Rheb,Sept8,Eftud2,Eif2s3x,Atl2,Arl2,Arl3,Rab9,Rhot1,Ola1,Arl8b,Rab3c,Diras2,Rab14,Nkiras1,Atl1,Dnm1l,Rab1b,Dnm3,Arl1,Irgq,Agap3,Rab21,Eif5,Arl15,Arhgap35,Dync1li1,Rab6b,Rab5a
8_Member	GO Molecular Functions	GO:0001883	purine nucleoside binding	-13.53	-10.9101	62/365	11566,11840,11842,11843,11844,11848,11852,12540,13429,13494,13495,13627,13628,13629,13660,14228,14677,14682,14683,14852,15516,15519,18952,19139,19326,19330,19338,19339,19342,19344,19346,19349,19384,19744,20362,20624,26905,56298,56327,56350,56382,59040,67059,67166,67295,68203,68365,69721,73991,74006,76308,103967,104303,210146,213990,216344,217869,218639,232906,235661,270192,271457	Adss,Arf1,Arf3,Arf4,Arf5,Rhoa,Rhob,Cdc42,Dnm1,Drg1,Drg2,Eef1a1,Eef1a2,Eef2,Ehd1,Fkbp4,Gnai1,Gnaq,Gnas,Gspt1,Hsp90ab1,Hsp90aa1,Sept4,Prps1,Rab11b,Rab18,Rab33b,Rab3a,Rab4b,Rab5b,Rab6a,Rab7,Ran,Rheb,Sept8,Eftud2,Eif2s3x,Atl2,Arl2,Arl3,Rab9,Rhot1,Ola1,Arl8b,Rab3c,Diras2,Rab14,Nkiras1,Atl1,Dnm1l,Rab1b,Dnm3,Arl1,Irgq,Agap3,Rab21,Eif5,Arl15,Arhgap35,Dync1li1,Rab6b,Rab5a
8_Member	GO Molecular Functions	GO:0032549	ribonucleoside binding	-13.4741	-10.9101	62/366	11566,11840,11842,11843,11844,11848,11852,12540,13429,13494,13495,13627,13628,13629,13660,14228,14677,14682,14683,14852,15516,15519,18952,19139,19326,19330,19338,19339,19342,19344,19346,19349,19384,19744,20362,20624,26905,56298,56327,56350,56382,59040,67059,67166,67295,68203,68365,69721,73991,74006,76308,103967,104303,210146,213990,216344,217869,218639,232906,235661,270192,271457	Adss,Arf1,Arf3,Arf4,Arf5,Rhoa,Rhob,Cdc42,Dnm1,Drg1,Drg2,Eef1a1,Eef1a2,Eef2,Ehd1,Fkbp4,Gnai1,Gnaq,Gnas,Gspt1,Hsp90ab1,Hsp90aa1,Sept4,Prps1,Rab11b,Rab18,Rab33b,Rab3a,Rab4b,Rab5b,Rab6a,Rab7,Ran,Rheb,Sept8,Eftud2,Eif2s3x,Atl2,Arl2,Arl3,Rab9,Rhot1,Ola1,Arl8b,Rab3c,Diras2,Rab14,Nkiras1,Atl1,Dnm1l,Rab1b,Dnm3,Arl1,Irgq,Agap3,Rab21,Eif5,Arl15,Arhgap35,Dync1li1,Rab6b,Rab5a
8_Member	GO Molecular Functions	GO:0001882	nucleoside binding	-13.456	-10.9101	63/376	11566,11840,11842,11843,11844,11848,11852,12540,13429,13494,13495,13627,13628,13629,13660,14228,14677,14682,14683,14852,15516,15519,18952,19139,19326,19330,19338,19339,19342,19344,19346,19349,19384,19744,20362,20624,26905,56298,56327,56350,56382,59040,60595,67059,67166,67295,68203,68365,69721,73991,74006,76308,103967,104303,210146,213990,216344,217869,218639,232906,235661,270192,271457	Adss,Arf1,Arf3,Arf4,Arf5,Rhoa,Rhob,Cdc42,Dnm1,Drg1,Drg2,Eef1a1,Eef1a2,Eef2,Ehd1,Fkbp4,Gnai1,Gnaq,Gnas,Gspt1,Hsp90ab1,Hsp90aa1,Sept4,Prps1,Rab11b,Rab18,Rab33b,Rab3a,Rab4b,Rab5b,Rab6a,Rab7,Ran,Rheb,Sept8,Eftud2,Eif2s3x,Atl2,Arl2,Arl3,Rab9,Rhot1,Actn4,Ola1,Arl8b,Rab3c,Diras2,Rab14,Nkiras1,Atl1,Dnm1l,Rab1b,Dnm3,Arl1,Irgq,Agap3,Rab21,Eif5,Arl15,Arhgap35,Dync1li1,Rab6b,Rab5a
8_Member	GO Molecular Functions	GO:0005525	GTP binding	-13.0683	-10.5845	60/354	11566,11840,11842,11843,11844,11848,11852,12540,13429,13494,13495,13627,13628,13629,13660,14228,14677,14682,14683,14852,15516,15519,18952,19326,19330,19338,19339,19342,19344,19346,19349,19384,19744,20362,20624,26905,56298,56327,56350,56382,59040,67059,67166,67295,68203,68365,69721,73991,74006,76308,103967,104303,210146,213990,216344,217869,218639,232906,270192,271457	Adss,Arf1,Arf3,Arf4,Arf5,Rhoa,Rhob,Cdc42,Dnm1,Drg1,Drg2,Eef1a1,Eef1a2,Eef2,Ehd1,Fkbp4,Gnai1,Gnaq,Gnas,Gspt1,Hsp90ab1,Hsp90aa1,Sept4,Rab11b,Rab18,Rab33b,Rab3a,Rab4b,Rab5b,Rab6a,Rab7,Ran,Rheb,Sept8,Eftud2,Eif2s3x,Atl2,Arl2,Arl3,Rab9,Rhot1,Ola1,Arl8b,Rab3c,Diras2,Rab14,Nkiras1,Atl1,Dnm1l,Rab1b,Dnm3,Arl1,Irgq,Agap3,Rab21,Eif5,Arl15,Arhgap35,Rab6b,Rab5a
8_Member	GO Molecular Functions	GO:0019001	guanyl nucleotide binding	-12.8749	-10.4455	62/377	11566,11840,11842,11843,11844,11848,11852,12540,13429,13494,13495,13627,13628,13629,13660,14228,14677,14682,14683,14852,15516,15519,18952,19139,19326,19330,19338,19339,19342,19344,19346,19349,19384,19744,20362,20624,26905,56298,56327,56350,56382,59040,67059,67166,67295,68203,68365,69721,73991,74006,76308,103967,104303,210146,213990,216344,217869,218639,232906,235661,270192,271457	Adss,Arf1,Arf3,Arf4,Arf5,Rhoa,Rhob,Cdc42,Dnm1,Drg1,Drg2,Eef1a1,Eef1a2,Eef2,Ehd1,Fkbp4,Gnai1,Gnaq,Gnas,Gspt1,Hsp90ab1,Hsp90aa1,Sept4,Prps1,Rab11b,Rab18,Rab33b,Rab3a,Rab4b,Rab5b,Rab6a,Rab7,Ran,Rheb,Sept8,Eftud2,Eif2s3x,Atl2,Arl2,Arl3,Rab9,Rhot1,Ola1,Arl8b,Rab3c,Diras2,Rab14,Nkiras1,Atl1,Dnm1l,Rab1b,Dnm3,Arl1,Irgq,Agap3,Rab21,Eif5,Arl15,Arhgap35,Dync1li1,Rab6b,Rab5a
8_Member	GO Molecular Functions	GO:0032561	guanyl ribonucleotide binding	-12.8749	-10.4455	62/377	11566,11840,11842,11843,11844,11848,11852,12540,13429,13494,13495,13627,13628,13629,13660,14228,14677,14682,14683,14852,15516,15519,18952,19139,19326,19330,19338,19339,19342,19344,19346,19349,19384,19744,20362,20624,26905,56298,56327,56350,56382,59040,67059,67166,67295,68203,68365,69721,73991,74006,76308,103967,104303,210146,213990,216344,217869,218639,232906,235661,270192,271457	Adss,Arf1,Arf3,Arf4,Arf5,Rhoa,Rhob,Cdc42,Dnm1,Drg1,Drg2,Eef1a1,Eef1a2,Eef2,Ehd1,Fkbp4,Gnai1,Gnaq,Gnas,Gspt1,Hsp90ab1,Hsp90aa1,Sept4,Prps1,Rab11b,Rab18,Rab33b,Rab3a,Rab4b,Rab5b,Rab6a,Rab7,Ran,Rheb,Sept8,Eftud2,Eif2s3x,Atl2,Arl2,Arl3,Rab9,Rhot1,Ola1,Arl8b,Rab3c,Diras2,Rab14,Nkiras1,Atl1,Dnm1l,Rab1b,Dnm3,Arl1,Irgq,Agap3,Rab21,Eif5,Arl15,Arhgap35,Dync1li1,Rab6b,Rab5a
8_Member	GO Molecular Functions	GO:0003924	GTPase activity	-10.6779	-8.31914	49/291	11848,11852,12540,13205,13429,13494,13495,13627,13628,13629,14677,14682,14683,14704,14852,17850,18952,19326,19330,19338,19339,19342,19344,19346,19349,19384,19744,20362,20624,26905,56298,56327,56350,56382,59040,67295,68203,68365,69721,73991,74006,76308,103967,104303,213990,216344,232906,270192,271457	Rhoa,Rhob,Cdc42,Ddx3x,Dnm1,Drg1,Drg2,Eef1a1,Eef1a2,Eef2,Gnai1,Gnaq,Gnas,Gng3,Gspt1,Mmut,Sept4,Rab11b,Rab18,Rab33b,Rab3a,Rab4b,Rab5b,Rab6a,Rab7,Ran,Rheb,Sept8,Eftud2,Eif2s3x,Atl2,Arl2,Arl3,Rab9,Rhot1,Rab3c,Diras2,Rab14,Nkiras1,Atl1,Dnm1l,Rab1b,Dnm3,Arl1,Agap3,Rab21,Arhgap35,Rab6b,Rab5a
8_Member	GO Molecular Functions	GO:0019003	GDP binding	-7.93329	-5.76483	20/77	11840,11848,11852,14677,19139,19326,19330,19344,19349,19384,19744,56327,56350,56382,67166,68203,68365,216344,235661,271457	Arf1,Rhoa,Rhob,Gnai1,Prps1,Rab11b,Rab18,Rab5b,Rab7,Ran,Rheb,Arl2,Arl3,Rab9,Arl8b,Diras2,Rab14,Rab21,Dync1li1,Rab5a
9_Summary	GO Molecular Functions	GO:0043021	ribonucleoprotein complex binding	-13.6421	-10.9366	37/147	12995,13001,13205,13207,13211,13629,13665,14265,14828,15381,15387,15469,16210,16785,19045,19652,20638,20918,22384,24015,51810,56040,56347,56463,66661,67332,71974,73158,74838,75705,75786,192170,224742,229317,231659,276770,432508	Csnk2a1,Csnk2b,Ddx3x,Ddx5,Dhx9,Eef2,Eif2s1,Fmr1,Hspa5,Hnrnpc,Hnrnpk,Prmt1,Impact,Rpsa,Ppp1ca,Rbm3,Snrpb,Eif1,Eif4h,Abce1,Hnrnpu,Rplp1,Eif3c,Snd1,Srp72,Snrpd3,Prmt3,Larp1,Naa15,Eif4b,Ckap5,Eif4a3,Abcf1,Eif2a,Gcn1,Eif5a,Cpsf6
9_Member	GO Molecular Functions	GO:0043021	ribonucleoprotein complex binding	-13.6421	-10.9366	37/147	12995,13001,13205,13207,13211,13629,13665,14265,14828,15381,15387,15469,16210,16785,19045,19652,20638,20918,22384,24015,51810,56040,56347,56463,66661,67332,71974,73158,74838,75705,75786,192170,224742,229317,231659,276770,432508	Csnk2a1,Csnk2b,Ddx3x,Ddx5,Dhx9,Eef2,Eif2s1,Fmr1,Hspa5,Hnrnpc,Hnrnpk,Prmt1,Impact,Rpsa,Ppp1ca,Rbm3,Snrpb,Eif1,Eif4h,Abce1,Hnrnpu,Rplp1,Eif3c,Snd1,Srp72,Snrpd3,Prmt3,Larp1,Naa15,Eif4b,Ckap5,Eif4a3,Abcf1,Eif2a,Gcn1,Eif5a,Cpsf6
9_Member	GO Molecular Functions	GO:0043022	ribosome binding	-4.9692	-3.11555	14/62	13629,13665,14265,14828,16210,16785,56347,66661,71974,74838,224742,229317,231659,276770	Eef2,Eif2s1,Fmr1,Hspa5,Impact,Rpsa,Eif3c,Srp72,Prmt3,Naa15,Abcf1,Eif2a,Gcn1,Eif5a
10_Summary	GO Molecular Functions	GO:0003779	actin binding	-12.8161	-10.4116	67/428	12331,12385,12386,12632,13169,13518,13629,13800,13823,13829,14248,14457,15444,16210,17118,17698,17755,17756,17886,17918,17920,18643,18754,18810,19230,19684,21894,21916,22629,23789,26936,50876,51810,52589,54418,56370,56431,60595,63985,64009,67252,70549,71960,71994,73178,74192,76441,76499,77569,77579,77767,78885,80297,80743,83767,100169,102866,104027,110380,192176,217124,218194,218952,226251,239719…	Cap1,Ctnna1,Ctnna2,Cfl2,Dbnl,Dst,Eef2,Enah,Epb41l3,Dmtn,Flii,Gas7,Hpca,Impact,Marcks,Msn,Map1b,Map2,Myh9,Myo5a,Myo6,Pfn1,Prkce,Plec,Twf1,Rdx,Tln1,Tmod1,Ywhah,Coro1b,Mprip,Tmod2,Hnrnpu,Ncald,Fmn2,Tagln3,Dstn,Actn4,Gmfb,Syne1,Cap2,Tln2,Myh14,Cnn3,Wasl,Arpc5l,Daam2,Clasp2,Limch1,Myh10,Ermn,Coro7,Sptbn4,Vps16,Wasf1,Phactr4,Pls3,Synpo,Shroom2,Flna,Ppp1r9b,Phactr1,Fermt2,Ablim1,Mrtfb,Ppp1r9a,Myo18a
10_Member	GO Molecular Functions	GO:0003779	actin binding	-12.8161	-10.4116	67/428	12331,12385,12386,12632,13169,13518,13629,13800,13823,13829,14248,14457,15444,16210,17118,17698,17755,17756,17886,17918,17920,18643,18754,18810,19230,19684,21894,21916,22629,23789,26936,50876,51810,52589,54418,56370,56431,60595,63985,64009,67252,70549,71960,71994,73178,74192,76441,76499,77569,77579,77767,78885,80297,80743,83767,100169,102866,104027,110380,192176,217124,218194,218952,226251,239719…	Cap1,Ctnna1,Ctnna2,Cfl2,Dbnl,Dst,Eef2,Enah,Epb41l3,Dmtn,Flii,Gas7,Hpca,Impact,Marcks,Msn,Map1b,Map2,Myh9,Myo5a,Myo6,Pfn1,Prkce,Plec,Twf1,Rdx,Tln1,Tmod1,Ywhah,Coro1b,Mprip,Tmod2,Hnrnpu,Ncald,Fmn2,Tagln3,Dstn,Actn4,Gmfb,Syne1,Cap2,Tln2,Myh14,Cnn3,Wasl,Arpc5l,Daam2,Clasp2,Limch1,Myh10,Ermn,Coro7,Sptbn4,Vps16,Wasf1,Phactr4,Pls3,Synpo,Shroom2,Flna,Ppp1r9b,Phactr1,Fermt2,Ablim1,Mrtfb,Ppp1r9a,Myo18a
10_Member	GO Molecular Functions	GO:0051015	actin filament binding	-9.39477	-7.11516	37/200	12385,12386,12632,13169,13629,13829,14248,14457,17118,17886,17918,17920,19230,21894,21916,23789,56370,56431,60595,64009,70549,71960,73178,74192,76499,77579,77767,78885,80743,102866,110380,192176,217124,218952,226251,243725,360013	Ctnna1,Ctnna2,Cfl2,Dbnl,Eef2,Dmtn,Flii,Gas7,Marcks,Myh9,Myo5a,Myo6,Twf1,Tln1,Tmod1,Coro1b,Tagln3,Dstn,Actn4,Syne1,Tln2,Myh14,Wasl,Arpc5l,Clasp2,Myh10,Ermn,Coro7,Vps16,Pls3,Shroom2,Flna,Ppp1r9b,Fermt2,Ablim1,Ppp1r9a,Myo18a
11_Summary	GO Molecular Functions	GO:0051020	GTPase binding	-9.42419	-7.11516	68/519	11765,12306,13660,13806,14567,14569,15519,16211,16568,17918,17988,18195,18479,18643,18747,19349,19385,19386,19387,19417,19878,19894,22608,26395,53972,54126,54411,66508,66656,68051,68576,70572,71810,74006,76089,76441,76582,76795,83767,98732,99371,101314,101489,102058,106039,107508,108911,109934,110279,110750,111173,140580,192176,207227,208869,216831,216963,223254,223435,224105,226407,227800,233726…	Ap1g1,Anxa2,Ehd1,Eno1,Gdi1,Gdi2,Hsp90aa1,Kpnb1,Kif3a,Myo5a,Ndrg1,Nsf,Pak1,Pfn1,Prkaca,Rab7,Ranbp1,Ranbp2,Rangap1,Rasgrf1,Rock2,Rph3a,Ybx1,Map2k1,Ngef,Arhgef7,Atp6ap1,Lamtor1,Eef1d,Nutf2,Lamtor5,Ipo5,Ranbp3,Dnm1l,Rapgef2,Daam2,Ipo11,Tbc1d9b,Wasf1,Rab3gap2,Arfgef2,Brk1,Ric8a,Exoc8,Gga1,Eprs,Rcc2,Abr,Bcr,Cse1l,Erc1,Elmo1,Flna,Stxbp5l,Dock3,Arhgap44,Git1,Farp1,Trio,Pak2,Rab3gap1,Rabgap1,Ipo7,Psd3,Tnp…
11_Member	GO Molecular Functions	GO:0051020	GTPase binding	-9.42419	-7.11516	68/519	11765,12306,13660,13806,14567,14569,15519,16211,16568,17918,17988,18195,18479,18643,18747,19349,19385,19386,19387,19417,19878,19894,22608,26395,53972,54126,54411,66508,66656,68051,68576,70572,71810,74006,76089,76441,76582,76795,83767,98732,99371,101314,101489,102058,106039,107508,108911,109934,110279,110750,111173,140580,192176,207227,208869,216831,216963,223254,223435,224105,226407,227800,233726…	Ap1g1,Anxa2,Ehd1,Eno1,Gdi1,Gdi2,Hsp90aa1,Kpnb1,Kif3a,Myo5a,Ndrg1,Nsf,Pak1,Pfn1,Prkaca,Rab7,Ranbp1,Ranbp2,Rangap1,Rasgrf1,Rock2,Rph3a,Ybx1,Map2k1,Ngef,Arhgef7,Atp6ap1,Lamtor1,Eef1d,Nutf2,Lamtor5,Ipo5,Ranbp3,Dnm1l,Rapgef2,Daam2,Ipo11,Tbc1d9b,Wasf1,Rab3gap2,Arfgef2,Brk1,Ric8a,Exoc8,Gga1,Eprs,Rcc2,Abr,Bcr,Cse1l,Erc1,Elmo1,Flna,Stxbp5l,Dock3,Arhgap44,Git1,Farp1,Trio,Pak2,Rab3gap1,Rabgap1,Ipo7,Psd3,Tnp…
11_Member	GO Molecular Functions	GO:0031267	small GTPase binding	-7.51412	-5.37498	55/426	11765,12306,13660,14567,14569,16211,16568,17918,17988,18195,18479,18643,18747,19349,19385,19386,19387,19417,19878,19894,26395,53972,54126,54411,68051,70572,71810,74006,76089,76441,76582,76795,83767,98732,101314,102058,106039,108911,109934,110279,110750,111173,192176,207227,216831,216963,223254,223435,224105,226407,227800,233726,238799,320127,382253	Ap1g1,Anxa2,Ehd1,Gdi1,Gdi2,Kpnb1,Kif3a,Myo5a,Ndrg1,Nsf,Pak1,Pfn1,Prkaca,Rab7,Ranbp1,Ranbp2,Rangap1,Rasgrf1,Rock2,Rph3a,Map2k1,Ngef,Arhgef7,Atp6ap1,Nutf2,Ipo5,Ranbp3,Dnm1l,Rapgef2,Daam2,Ipo11,Tbc1d9b,Wasf1,Rab3gap2,Brk1,Exoc8,Gga1,Rcc2,Abr,Bcr,Cse1l,Erc1,Flna,Stxbp5l,Arhgap44,Git1,Farp1,Trio,Pak2,Rab3gap1,Rabgap1,Ipo7,Tnpo1,Dgki,Cdkl5
11_Member	GO Molecular Functions	GO:0017016	Ras GTPase binding	-7.24628	-5.13053	53/411	11765,12306,13660,14567,14569,16211,16568,17918,17988,18195,18479,18643,18747,19349,19385,19386,19387,19417,19878,19894,26395,53972,54126,54411,68051,70572,71810,74006,76089,76441,76582,76795,83767,98732,101314,102058,108911,109934,110279,110750,111173,192176,207227,216831,223254,223435,224105,226407,227800,233726,238799,320127,382253	Ap1g1,Anxa2,Ehd1,Gdi1,Gdi2,Kpnb1,Kif3a,Myo5a,Ndrg1,Nsf,Pak1,Pfn1,Prkaca,Rab7,Ranbp1,Ranbp2,Rangap1,Rasgrf1,Rock2,Rph3a,Map2k1,Ngef,Arhgef7,Atp6ap1,Nutf2,Ipo5,Ranbp3,Dnm1l,Rapgef2,Daam2,Ipo11,Tbc1d9b,Wasf1,Rab3gap2,Brk1,Exoc8,Rcc2,Abr,Bcr,Cse1l,Erc1,Flna,Stxbp5l,Arhgap44,Farp1,Trio,Pak2,Rab3gap1,Rabgap1,Ipo7,Tnpo1,Dgki,Cdkl5
11_Member	GO Molecular Functions	GO:0017137	Rab GTPase binding	-2.39701	-0.997257	19/166	11765,12306,13660,14567,14569,16568,17918,17988,18195,18747,19894,54411,74006,76795,98732,111173,207227,226407,227800	Ap1g1,Anxa2,Ehd1,Gdi1,Gdi2,Kif3a,Myo5a,Ndrg1,Nsf,Prkaca,Rph3a,Atp6ap1,Dnm1l,Tbc1d9b,Rab3gap2,Erc1,Stxbp5l,Rab3gap1,Rabgap1
12_Summary	GO Molecular Functions	GO:0031072	heat shock protein binding	-9.40553	-7.11516	30/139	11806,12539,12568,12576,13806,14228,14815,14828,15182,15387,15481,15502,15516,15526,16211,16706,17762,19060,22042,56351,56354,56424,66656,66861,67072,67738,70356,71472,83945,217737,11657,12492,12870,14824,19122,27643,29810,67035,67397,110135	Apoa1,Cdc37,Cdk5,Cdkn1b,Eno1,Fkbp4,Nr3c1,Hspa5,Hdac2,Hnrnpk,Hspa8,Dnaja1,Hsp90ab1,Hspa9,Kpnb1,Ksr1,Mapt,Ppp5c,Tfrc,Ptges3,Dnajc7,Stub1,Eef1d,Dnajc10,Cdc37l1,Ppid,St13,Usp19,Dnaja3,Ahsa1,Alb,Scarb2,Cp,Grn,Prnp,Ubl4a,Bag3,Dnajb4,Erp29,Fgb
12_Member	GO Molecular Functions	GO:0031072	heat shock protein binding	-9.40553	-7.11516	30/139	11806,12539,12568,12576,13806,14228,14815,14828,15182,15387,15481,15502,15516,15526,16211,16706,17762,19060,22042,56351,56354,56424,66656,66861,67072,67738,70356,71472,83945,217737	Apoa1,Cdc37,Cdk5,Cdkn1b,Eno1,Fkbp4,Nr3c1,Hspa5,Hdac2,Hnrnpk,Hspa8,Dnaja1,Hsp90ab1,Hspa9,Kpnb1,Ksr1,Mapt,Ppp5c,Tfrc,Ptges3,Dnajc7,Stub1,Eef1d,Dnajc10,Cdc37l1,Ppid,St13,Usp19,Dnaja3,Ahsa1
12_Member	GO Molecular Functions	GO:0051087	chaperone binding	-8.72728	-6.51461	24/99	11657,12492,12539,12576,12870,14824,15481,15502,15526,16706,17762,19122,22042,27643,29810,56351,56424,66861,67035,67072,67397,70356,110135,217737	Alb,Scarb2,Cdc37,Cdkn1b,Cp,Grn,Hspa8,Dnaja1,Hspa9,Ksr1,Mapt,Prnp,Tfrc,Ubl4a,Bag3,Ptges3,Stub1,Dnajc10,Dnajb4,Cdc37l1,Erp29,St13,Fgb,Ahsa1
12_Member	GO Molecular Functions	GO:0051879	Hsp90 protein binding	-5.02614	-3.15872	12/46	12539,12568,14815,16211,16706,17762,19060,56351,56424,67738,71472,217737	Cdc37,Cdk5,Nr3c1,Kpnb1,Ksr1,Mapt,Ppp5c,Ptges3,Stub1,Ppid,Usp19,Ahsa1
12_Member	GO Molecular Functions	GO:0030544	Hsp70 protein binding	-2.14428	-0.812842	8/49	12576,14815,15502,22042,56424,66861,70356,83945	Cdkn1b,Nr3c1,Dnaja1,Tfrc,Stub1,Dnajc10,St13,Dnaja3
13_Summary	GO Molecular Functions	GO:0008047	enzyme activator activity	-9.40329	-7.11516	62/453	11308,11806,11808,11816,11820,11840,12283,13196,13205,14567,14569,14667,14682,14683,15502,18607,18754,19188,19339,19346,19385,19386,19387,19414,20334,21770,24012,26395,56040,59029,66251,66861,67035,69780,71302,71810,74206,76089,76795,77038,98732,100169,101489,104303,109689,109934,110279,192197,207227,213990,216831,216963,216965,217737,224105,226407,227800,231801,232906,269523,270162,380711,15505,…	Abi1,Apoa1,Apoa4,Apoe,App,Arf1,Cab39,Asap1,Ddx3x,Gdi1,Gdi2,Gm2a,Gnaq,Gnas,Dnaja1,Pdpk1,Prkce,Psme2,Rab3a,Rab6a,Ranbp1,Ranbp2,Rangap1,Rasa3,Sec23a,Ppp2r5d,Rgs7,Map2k1,Rplp1,Psmd14,Arfgap3,Dnajc10,Dnajb4,Smap2,Arhgap26,Ranbp3,Sipa1l3,Rapgef2,Tbc1d9b,Arfgap2,Rab3gap2,Phactr4,Ric8a,Arl1,Arrb1,Abr,Bcr,Bcas3,Stxbp5l,Agap3,Arhgap44,Git1,Taok1,Ahsa1,Pak2,Rab3gap1,Rabgap1,Agfg2,Arhgap35,Vcp,Elmod1,Rap1gap…
13_Member	GO Molecular Functions	GO:0008047	enzyme activator activity	-9.40329	-7.11516	62/453	11308,11806,11808,11816,11820,11840,12283,13196,13205,14567,14569,14667,14682,14683,15502,18607,18754,19188,19339,19346,19385,19386,19387,19414,20334,21770,24012,26395,56040,59029,66251,66861,67035,69780,71302,71810,74206,76089,76795,77038,98732,100169,101489,104303,109689,109934,110279,192197,207227,213990,216831,216963,216965,217737,224105,226407,227800,231801,232906,269523,270162,380711	Abi1,Apoa1,Apoa4,Apoe,App,Arf1,Cab39,Asap1,Ddx3x,Gdi1,Gdi2,Gm2a,Gnaq,Gnas,Dnaja1,Pdpk1,Prkce,Psme2,Rab3a,Rab6a,Ranbp1,Ranbp2,Rangap1,Rasa3,Sec23a,Ppp2r5d,Rgs7,Map2k1,Rplp1,Psmd14,Arfgap3,Dnajc10,Dnajb4,Smap2,Arhgap26,Ranbp3,Sipa1l3,Rapgef2,Tbc1d9b,Arfgap2,Rab3gap2,Phactr4,Ric8a,Arl1,Arrb1,Abr,Bcr,Bcas3,Stxbp5l,Agap3,Arhgap44,Git1,Taok1,Ahsa1,Pak2,Rab3gap1,Rabgap1,Agfg2,Arhgap35,Vcp,Elmod1,Rap1gap2
13_Member	GO Molecular Functions	GO:0060589	nucleoside-triphosphatase regulator activity	-8.93207	-6.70361	46/295	13196,14567,14569,14682,15502,15505,18643,19339,19346,19385,19386,19387,19414,20334,24012,29810,66251,66861,67035,67839,69780,71302,71810,74206,76089,76795,77038,83945,98732,101489,109689,109934,110279,207227,213990,216831,216963,217737,217869,226407,227800,231801,232906,270162,320127,380711	Asap1,Gdi1,Gdi2,Gnaq,Dnaja1,Hsph1,Pfn1,Rab3a,Rab6a,Ranbp1,Ranbp2,Rangap1,Rasa3,Sec23a,Rgs7,Bag3,Arfgap3,Dnajc10,Dnajb4,Gpsm1,Smap2,Arhgap26,Ranbp3,Sipa1l3,Rapgef2,Tbc1d9b,Arfgap2,Dnaja3,Rab3gap2,Ric8a,Arrb1,Abr,Bcr,Stxbp5l,Agap3,Arhgap44,Git1,Ahsa1,Eif5,Rab3gap1,Rabgap1,Agfg2,Arhgap35,Elmod1,Dgki,Rap1gap2
13_Member	GO Molecular Functions	GO:0030695	GTPase regulator activity	-6.45606	-4.3983	37/256	13196,14567,14569,14682,19385,19386,19387,19414,20334,24012,66251,67839,69780,71302,71810,74206,76089,76795,77038,83945,98732,101489,109689,109934,110279,207227,213990,216831,216963,217869,226407,227800,231801,232906,270162,320127,380711	Asap1,Gdi1,Gdi2,Gnaq,Ranbp1,Ranbp2,Rangap1,Rasa3,Sec23a,Rgs7,Arfgap3,Gpsm1,Smap2,Arhgap26,Ranbp3,Sipa1l3,Rapgef2,Tbc1d9b,Arfgap2,Dnaja3,Rab3gap2,Ric8a,Arrb1,Abr,Bcr,Stxbp5l,Agap3,Arhgap44,Git1,Eif5,Rab3gap1,Rabgap1,Agfg2,Arhgap35,Elmod1,Dgki,Rap1gap2
13_Member	GO Molecular Functions	GO:0005096	GTPase activator activity	-5.38737	-3.45183	33/239	13196,14567,14569,14682,19385,19386,19387,19414,20334,24012,66251,69780,71302,71810,74206,76089,76795,77038,98732,101489,109689,109934,110279,207227,213990,216831,216963,226407,227800,231801,232906,270162,380711	Asap1,Gdi1,Gdi2,Gnaq,Ranbp1,Ranbp2,Rangap1,Rasa3,Sec23a,Rgs7,Arfgap3,Smap2,Arhgap26,Ranbp3,Sipa1l3,Rapgef2,Tbc1d9b,Arfgap2,Rab3gap2,Ric8a,Arrb1,Abr,Bcr,Stxbp5l,Agap3,Arhgap44,Git1,Rab3gap1,Rabgap1,Agfg2,Arhgap35,Elmod1,Rap1gap2
14_Summary	GO Molecular Functions	GO:0008022	protein C-terminus binding	-9.0343	-6.77242	40/234	11765,11938,12387,12539,13169,13429,16438,16648,16706,17975,17999,18195,18458,18642,19042,19047,19052,19053,19229,19339,19417,20239,20262,20479,21873,22218,26395,26400,53310,65106,72621,100732,101706,104015,170638,216965,217124,226562,242274,243725	Ap1g1,Atp2a2,Ctnnb1,Cdc37,Dbnl,Dnm1,Itpr1,Kpna3,Ksr1,Ncl,Nedd4,Nsf,Pabpc1,Pfkm,Ppm1a,Ppp1cc,Ppp2ca,Ppp2cb,Ptk2b,Rab3a,Rasgrf1,Atxn2,Stmn3,Vps4b,Tjp2,Sumo1,Map2k1,Map2k7,Dlg3,Arl6ip5,Pdzd11,Mapre3,Numa1,Synj1,Hpcal4,Taok1,Ppp1r9b,Prrc2c,Lrrc7,Ppp1r9a
14_Member	GO Molecular Functions	GO:0008022	protein C-terminus binding	-9.0343	-6.77242	40/234	11765,11938,12387,12539,13169,13429,16438,16648,16706,17975,17999,18195,18458,18642,19042,19047,19052,19053,19229,19339,19417,20239,20262,20479,21873,22218,26395,26400,53310,65106,72621,100732,101706,104015,170638,216965,217124,226562,242274,243725	Ap1g1,Atp2a2,Ctnnb1,Cdc37,Dbnl,Dnm1,Itpr1,Kpna3,Ksr1,Ncl,Nedd4,Nsf,Pabpc1,Pfkm,Ppm1a,Ppp1cc,Ppp2ca,Ppp2cb,Ptk2b,Rab3a,Rasgrf1,Atxn2,Stmn3,Vps4b,Tjp2,Sumo1,Map2k1,Map2k7,Dlg3,Arl6ip5,Pdzd11,Mapre3,Numa1,Synj1,Hpcal4,Taok1,Ppp1r9b,Prrc2c,Lrrc7,Ppp1r9a
15_Summary	GO Molecular Functions	GO:0035254	glutamate receptor binding	-8.96731	-6.72247	20/68	12313,12322,12330,12387,14360,14683,14810,14811,14812,17999,18195,18412,19122,19417,53310,56637,103967,233908,234678,242274	Calm1,Camk2a,Canx,Ctnnb1,Fyn,Gnas,Grin1,Grin2a,Grin2b,Nedd4,Nsf,Sqstm1,Prnp,Rasgrf1,Dlg3,Gsk3b,Dnm3,Fus,D230025D16Rik,Lrrc7
15_Member	GO Molecular Functions	GO:0035254	glutamate receptor binding	-8.96731	-6.72247	20/68	12313,12322,12330,12387,14360,14683,14810,14811,14812,17999,18195,18412,19122,19417,53310,56637,103967,233908,234678,242274	Calm1,Camk2a,Canx,Ctnnb1,Fyn,Gnas,Grin1,Grin2a,Grin2b,Nedd4,Nsf,Sqstm1,Prnp,Rasgrf1,Dlg3,Gsk3b,Dnm3,Fus,D230025D16Rik,Lrrc7
15_Member	GO Molecular Functions	GO:0035255	ionotropic glutamate receptor binding	-4.56767	-2.76249	11/43	12330,12387,14683,14812,17999,18195,18412,53310,56637,233908,242274	Canx,Ctnnb1,Gnas,Grin2b,Nedd4,Nsf,Sqstm1,Dlg3,Gsk3b,Fus,Lrrc7
16_Summary	GO Molecular Functions	GO:0019902	phosphatase binding	-8.06299	-5.86557	36/213	11651,11774,12387,12576,14265,14784,14810,15519,16438,16480,16568,17762,19045,19047,19052,19058,22027,26408,26413,26417,53310,54198,57321,71978,72590,73340,76497,80297,97387,100169,210376,217124,218194,243725,268980,269523	Akt1,Ap3b1,Ctnnb1,Cdkn1b,Fmr1,Grb2,Grin1,Hsp90aa1,Itpr1,Jup,Kif3a,Mapt,Ppp1ca,Ppp1cc,Ppp2ca,Ppp3r1,Hsp90b1,Map3k5,Mapk1,Mapk3,Dlg3,Snx3,Terf2ip,Ppp2r2a,Ppme1,Nptxr,Ppp1r11,Sptbn4,Strn4,Phactr4,Mtmr9,Ppp1r9b,Phactr1,Ppp1r9a,Strn,Vcp
16_Member	GO Molecular Functions	GO:0019902	phosphatase binding	-8.06299	-5.86557	36/213	11651,11774,12387,12576,14265,14784,14810,15519,16438,16480,16568,17762,19045,19047,19052,19058,22027,26408,26413,26417,53310,54198,57321,71978,72590,73340,76497,80297,97387,100169,210376,217124,218194,243725,268980,269523	Akt1,Ap3b1,Ctnnb1,Cdkn1b,Fmr1,Grb2,Grin1,Hsp90aa1,Itpr1,Jup,Kif3a,Mapt,Ppp1ca,Ppp1cc,Ppp2ca,Ppp3r1,Hsp90b1,Map3k5,Mapk1,Mapk3,Dlg3,Snx3,Terf2ip,Ppp2r2a,Ppme1,Nptxr,Ppp1r11,Sptbn4,Strn4,Phactr4,Mtmr9,Ppp1r9b,Phactr1,Ppp1r9a,Strn,Vcp
16_Member	GO Molecular Functions	GO:0019903	protein phosphatase binding	-7.50332	-5.37498	30/166	11651,11774,12387,12576,14265,14784,15519,16438,16480,16568,17762,19045,19047,19052,22027,26408,53310,54198,71978,72590,73340,76497,97387,100169,210376,217124,218194,243725,268980,269523	Akt1,Ap3b1,Ctnnb1,Cdkn1b,Fmr1,Grb2,Hsp90aa1,Itpr1,Jup,Kif3a,Mapt,Ppp1ca,Ppp1cc,Ppp2ca,Hsp90b1,Map3k5,Dlg3,Snx3,Ppp2r2a,Ppme1,Nptxr,Ppp1r11,Strn4,Phactr4,Mtmr9,Ppp1r9b,Phactr1,Ppp1r9a,Strn,Vcp
16_Member	GO Molecular Functions	GO:0051721	protein phosphatase 2A binding	-2.22556	-0.875372	7/38	11651,17762,19052,71978,72590,97387,268980	Akt1,Mapt,Ppp2ca,Ppp2r2a,Ppme1,Strn4,Strn
17_Summary	GO Molecular Functions	GO:0044325	ion channel binding	-7.70737	-5.5527	27/136	11735,11773,12313,12387,13854,14199,14265,14360,15516,15519,16498,18125,19042,19052,19122,20541,20614,22224,22629,22631,50997,60595,83814,109689,192176,217124,243725	Ank3,Ap2m1,Calm1,Ctnnb1,Epn1,Fhl1,Fmr1,Fyn,Hsp90ab1,Hsp90aa1,Kcnab2,Nos1,Ppm1a,Ppp2ca,Prnp,Slc8a1,Snap25,Usp10,Ywhah,Ywhaz,Mpp2,Actn4,Nedd4l,Arrb1,Flna,Ppp1r9b,Ppp1r9a
17_Member	GO Molecular Functions	GO:0044325	ion channel binding	-7.70737	-5.5527	27/136	11735,11773,12313,12387,13854,14199,14265,14360,15516,15519,16498,18125,19042,19052,19122,20541,20614,22224,22629,22631,50997,60595,83814,109689,192176,217124,243725	Ank3,Ap2m1,Calm1,Ctnnb1,Epn1,Fhl1,Fmr1,Fyn,Hsp90ab1,Hsp90aa1,Kcnab2,Nos1,Ppm1a,Ppp2ca,Prnp,Slc8a1,Snap25,Usp10,Ywhah,Ywhaz,Mpp2,Actn4,Nedd4l,Arrb1,Flna,Ppp1r9b,Ppp1r9a
18_Summary	GO Molecular Functions	GO:0051010	microtubule plus-end binding	-7.20572	-5.1022	9/16	11789,18472,56430,75786,76499,76707,100732,101706,269713,14265,22428,56637	Apc,Pafah1b1,Clip1,Ckap5,Clasp2,Clasp1,Mapre3,Numa1,Clip2,Fmr1,Dctn6,Gsk3b
18_Member	GO Molecular Functions	GO:0051010	microtubule plus-end binding	-7.20572	-5.1022	9/16	11789,18472,56430,75786,76499,76707,100732,101706,269713	Apc,Pafah1b1,Clip1,Ckap5,Clasp2,Clasp1,Mapre3,Numa1,Clip2
18_Member	GO Molecular Functions	GO:0070840	dynein complex binding	-2.76861	-1.25701	6/23	11789,14265,18472,22428,56637,101706	Apc,Fmr1,Pafah1b1,Dctn6,Gsk3b,Numa1
19_Summary	GO Molecular Functions	GO:0048156	tau protein binding	-7.04747	-4.95585	10/21	11785,11816,12759,14228,14360,15516,15519,19052,56637,71978	Apbb1,Apoe,Clu,Fkbp4,Fyn,Hsp90ab1,Hsp90aa1,Ppp2ca,Gsk3b,Ppp2r2a
19_Member	GO Molecular Functions	GO:0048156	tau protein binding	-7.04747	-4.95585	10/21	11785,11816,12759,14228,14360,15516,15519,19052,56637,71978	Apbb1,Apoe,Clu,Fkbp4,Fyn,Hsp90ab1,Hsp90aa1,Ppp2ca,Gsk3b,Ppp2r2a
20_Summary	GO Molecular Functions	GO:0004674	protein serine/threonine kinase activity	-6.89161	-4.81157	56/456	11651,12283,12322,12323,12325,12326,12568,12704,12995,13001,13175,16202,18479,18557,18604,18607,18747,18751,18752,18754,19229,19878,21969,26385,26395,26398,26400,26408,26413,26414,26417,26419,50932,52163,53416,56527,56637,59041,70661,70762,75607,93687,110279,110355,192292,216965,223255,223435,224105,227541,235604,237459,269774,381921,382253,665113,11534,12709,12715,13838,14360,14923,16706,18212,1…	Akt1,Cab39,Camk2a,Camk2b,Camk2g,Camk4,Cdk5,Cit,Csnk2a1,Csnk2b,Dclk1,Ilk,Pak1,Cdk18,Pdk2,Pdpk1,Prkaca,Prkcb,Prkcg,Prkce,Ptk2b,Rock2,Top1,Grk6,Map2k1,Map2k4,Map2k7,Map3k5,Mapk1,Mapk10,Mapk3,Mapk8,Mink1,Camk1,Stk39,Mast1,Gsk3b,Stk25,Sik3,Dclk2,Wnk2,Csnk1a1,Bcr,Grk2,Nrbp1,Taok1,Stk24,Trio,Pak2,Camk1d,Camkv,Cdk17,Aak1,Taok2,Cdkl5,Tnik,Adk,Ckb,Ckm,Epha4,Fyn,Guk1,Ksr1,Ntrk2,Pfkm,Pkm,Prps1,Twf1,Trim28,Na…
20_Member	GO Molecular Functions	GO:0004674	protein serine/threonine kinase activity	-6.89161	-4.81157	56/456	11651,12283,12322,12323,12325,12326,12568,12704,12995,13001,13175,16202,18479,18557,18604,18607,18747,18751,18752,18754,19229,19878,21969,26385,26395,26398,26400,26408,26413,26414,26417,26419,50932,52163,53416,56527,56637,59041,70661,70762,75607,93687,110279,110355,192292,216965,223255,223435,224105,227541,235604,237459,269774,381921,382253,665113	Akt1,Cab39,Camk2a,Camk2b,Camk2g,Camk4,Cdk5,Cit,Csnk2a1,Csnk2b,Dclk1,Ilk,Pak1,Cdk18,Pdk2,Pdpk1,Prkaca,Prkcb,Prkcg,Prkce,Ptk2b,Rock2,Top1,Grk6,Map2k1,Map2k4,Map2k7,Map3k5,Mapk1,Mapk10,Mapk3,Mapk8,Mink1,Camk1,Stk39,Mast1,Gsk3b,Stk25,Sik3,Dclk2,Wnk2,Csnk1a1,Bcr,Grk2,Nrbp1,Taok1,Stk24,Trio,Pak2,Camk1d,Camkv,Cdk17,Aak1,Taok2,Cdkl5,Tnik
20_Member	GO Molecular Functions	GO:0016301	kinase activity	-6.62011	-4.55135	81/772	11534,11651,12283,12322,12323,12325,12326,12568,12704,12709,12715,12995,13001,13175,13838,14360,14923,16202,16706,18212,18479,18557,18604,18607,18642,18746,18747,18751,18752,18754,19139,19229,19230,19878,21849,21969,26385,26395,26398,26400,26408,26413,26414,26417,26419,50932,52163,53416,56174,56421,56527,56637,59041,63828,70661,70762,71743,75607,84095,93687,110197,110279,110355,117150,192292,2161…	Adk,Akt1,Cab39,Camk2a,Camk2b,Camk2g,Camk4,Cdk5,Cit,Ckb,Ckm,Csnk2a1,Csnk2b,Dclk1,Epha4,Fyn,Guk1,Ilk,Ksr1,Ntrk2,Pak1,Cdk18,Pdk2,Pdpk1,Pfkm,Pkm,Prkaca,Prkcb,Prkcg,Prkce,Prps1,Ptk2b,Twf1,Rock2,Trim28,Top1,Grk6,Map2k1,Map2k4,Map2k7,Map3k5,Mapk1,Mapk10,Mapk3,Mapk8,Mink1,Camk1,Stk39,Nagk,Pfkp,Mast1,Gsk3b,Stk25,Fn3k,Sik3,Dclk2,Coasy,Wnk2,Pi4k2a,Csnk1a1,Dgkg,Bcr,Grk2,Pip4k2c,Nrbp1,Pdxk,Taok1,Ppp1r9b,Stk24…
20_Member	GO Molecular Functions	GO:0016773	phosphotransferase activity, alcohol group as acceptor	-6.23632	-4.19975	75/712	11534,11651,12283,12322,12323,12325,12326,12568,12704,12995,13001,13175,13838,14360,16202,16706,18212,18479,18557,18604,18607,18642,18746,18747,18751,18752,18754,19229,19230,19878,21849,21969,26385,26395,26398,26400,26408,26413,26414,26417,26419,50932,52163,53416,56174,56421,56527,56637,59041,70661,70762,71743,75607,84095,93687,110197,110279,110355,117150,192292,216134,216965,217124,223255,223435…	Adk,Akt1,Cab39,Camk2a,Camk2b,Camk2g,Camk4,Cdk5,Cit,Csnk2a1,Csnk2b,Dclk1,Epha4,Fyn,Ilk,Ksr1,Ntrk2,Pak1,Cdk18,Pdk2,Pdpk1,Pfkm,Pkm,Prkaca,Prkcb,Prkcg,Prkce,Ptk2b,Twf1,Rock2,Trim28,Top1,Grk6,Map2k1,Map2k4,Map2k7,Map3k5,Mapk1,Mapk10,Mapk3,Mapk8,Mink1,Camk1,Stk39,Nagk,Pfkp,Mast1,Gsk3b,Stk25,Sik3,Dclk2,Coasy,Wnk2,Pi4k2a,Csnk1a1,Dgkg,Bcr,Grk2,Pip4k2c,Nrbp1,Pdxk,Taok1,Ppp1r9b,Stk24,Trio,Pi4ka,Pak2,Camk1d,…
20_Member	GO Molecular Functions	GO:0004672	protein kinase activity	-5.01215	-3.15166	63/612	11651,12283,12322,12323,12325,12326,12568,12704,12995,13001,13175,13838,14360,16202,16706,18212,18479,18557,18604,18607,18747,18751,18752,18754,19229,19230,19878,21849,21969,26385,26395,26398,26400,26408,26413,26414,26417,26419,50932,52163,53416,56527,56637,59041,70661,70762,75607,93687,110279,110355,192292,216965,217124,223255,223435,224105,227541,235604,237459,269774,381921,382253,665113	Akt1,Cab39,Camk2a,Camk2b,Camk2g,Camk4,Cdk5,Cit,Csnk2a1,Csnk2b,Dclk1,Epha4,Fyn,Ilk,Ksr1,Ntrk2,Pak1,Cdk18,Pdk2,Pdpk1,Prkaca,Prkcb,Prkcg,Prkce,Ptk2b,Twf1,Rock2,Trim28,Top1,Grk6,Map2k1,Map2k4,Map2k7,Map3k5,Mapk1,Mapk10,Mapk3,Mapk8,Mink1,Camk1,Stk39,Mast1,Gsk3b,Stk25,Sik3,Dclk2,Wnk2,Csnk1a1,Bcr,Grk2,Nrbp1,Taok1,Ppp1r9b,Stk24,Trio,Pak2,Camk1d,Camkv,Cdk17,Aak1,Taok2,Cdkl5,Tnik

## Sheet: Table S5D MCODE
Table S5D Actively translating protein clusters identified by MCODE.
Network	Structure_Annotation
Input ID	GO:0098794|postsynapse|-38.3;GO:0030425|dendrite|-37.6;GO:0097447|dendritic tree|-37.5
Input ID_MCODE_ALL	GO:0014069|postsynaptic density|-12.0;GO:0032279|asymmetric synapse|-11.9;GO:0098984|neuron to neuron synapse|-11.6
Input ID_SUB1_MCODE_1	GO:0030425|dendrite|-11.6;GO:0097447|dendritic tree|-11.6;GO:0014069|postsynaptic density|-10.3
Input ID_SUB4_MCODE_2	GO:0030904|retromer complex|-12.2;CORUM:5574|Vps29-Vps35-Vps26a complex|-11.5;GO:0030906|retromer, cargo-selective complex|-11.5
Input ID_SUB2_MCODE_4	CORUM:2750|Gata1-Fog1-MeCP1 complex|-9.7;GO:0090545|CHD-type complex|-9.4;GO:0016581|NuRD complex|-9.4
Network	Pathway_Annotation
Input ID	GO:1903827|regulation of cellular protein localization|-26.6;GO:0044257|cellular protein catabolic process|-23.1;GO:0033365|protein localization to organelle|-20.6
Input ID_MCODE_ALL	mmu04720|Long-term potentiation|-9.5;mmu05010|Alzheimer's disease|-8.6;mmu04713|Circadian entrainment|-8.5
Input ID_SUB1_MCODE_1	mmu04720|Long-term potentiation|-11.5;R-MMU-5684996|MAPK1/MAPK3 signaling|-10.7;R-MMU-9607240|FLT3 Signaling|-10.5
Input ID_SUB4_MCODE_2	GO:0042147|retrograde transport, endosome to Golgi|-9.7;GO:0016482|cytosolic transport|-8.6;R-MMU-3238698|WNT ligand biogenesis and trafficking|-8.3
Input ID_SUB1_MCODE_3	GO:0034605|cellular response to heat|-7.5;GO:0009408|response to heat|-6.9;GO:0009266|response to temperature stimulus|-6.3
Input ID_SUB2_MCODE_4	R-MMU-6804758|Regulation of TP53 Activity through Acetylation|-8.6;R-MMU-8943724|Regulation of PTEN gene transcription|-8.1;R-MMU-73762|RNA Polymerase I Transcription Initiation|-8.1
Input ID_SUB5_MCODE_5	R-MMU-212436|Generic Transcription Pathway|-4.4
Network	Function_Annotation
Input ID	GO:0019904|protein domain specific binding|-26.6;GO:0019901|protein kinase binding|-23.6;GO:0031625|ubiquitin protein ligase binding|-17.7
Input ID_MCODE_ALL	GO:0050780|dopamine receptor binding|-9.9;GO:0001664|G protein-coupled receptor binding|-8.5;GO:0004972|NMDA glutamate receptor activity|-7.1
Input ID_SUB1_MCODE_1	GO:0050780|dopamine receptor binding|-8.8;GO:0004972|NMDA glutamate receptor activity|-8.0;GO:0035254|glutamate receptor binding|-7.0
Input ID_SUB1_MCODE_3	GO:0051087|chaperone binding|-7.0;GO:0031072|heat shock protein binding|-6.5;GO:0019904|protein domain specific binding|-4.2
